# Supplementary material for: Allele mining of seed-related genes reveals early movement, selection and adaptation of Asian rice landraces
Source: Research Square preprint supplement (doi:10.21203/rs.3.rs-6249167/v1), 2025-03-28
Supplement: Supplementary file 1 [file 00723d5a8ae3becaad0ab2b5.xlsx]

## Sheet: Table S1
Table S1. Excavated sites, estimated dates and cultures of the carbonated rice grains in the current study. (Excel file, with Chinese translation)
Archaeolgical sites	Abbreviation	考古遺址	Archaeological culture	考古文化	Estimated dates
Nankuanli East	NKLE	南關里東	Dapenkeng culture	大坌坑文化	~4800BP
Youhsienfang	YHF	右先方	Niuchouzi culture	牛稠仔文化	~3800 BP
Wuchiantsuo	WCT	五間厝	Niaosong culture	蔦松文化	~1400-500 BP
Huilaili	HLL	惠來里	Fanziyuen culture	番仔園文化	~1300 BP

## Sheet: Table S2
Table S2. Materials and their related information used in the study. Accession names, K value in structure analysis, region collected, BioProject (resequencing data in NCBI), culture mode, GPS information, allele types for each of the 14 genes are listed. (Excel file)
ID	Name	LAT	LON	K14	Type	Region	BioProject	primitive_mod	LGY3	GS3	qTGW3	qSW5	TGW6a	GW6a	Rc	GBSS	qSH1	qSH3	SH4	Cold1	Hd1
3K122	19	21.1278	82.8006	V8	Ind	India	PRJNA795890	T	Ref	Ref	Ref	0.95kb	Ref	Ref	del	Ref	Alt	Ref	Ref	T	WT
IRIS-11036	34	30.3958	69.3625	V9	Aus	Pakistan	PRJNA795890	T	Ref	3	Ref	WT	Ref	Ref	Rc	Ref	Alt	Ref	Ref	C	T13
IRIS-11037	421	30.3958	69.3625	V9	Aus	Pakistan	PRJNA795890	T	Ref	Ref	Ref	WT	Ref	Ref	Rc	Ref	Alt	qSH3	Ref	C	T13
9311	9311	#N/A	#N/A	V11	Ind	China	PRJNA514100	0	2	3	Ref	WT	Ref	1_2	del	Ref	Alt	Ref	Ref	T	T7
IRIS-11661	91-382	27.5119	90.4356	V2	Jap	Bhutan	PRJNA795890	T	Ref	3	Ref	1.2kb	Ref	Ref	del	Ref	Alt	Ref	Ref	A	WT
IRIS-12027	ACEH	3	98.3333	V11	Ind	Indonesia	PRJNA795890	T	Ref	2	Ref	WT	Ref	1_2	Rc	Ref	Alt	Ref	Ref	T	T13
IRIS-12014	ADANKARU	#N/A	#N/A	V8	Ind	Nigeria	PRJNA795890	T	Ref	3	Ref	WT	Ref	Ref	del	Ref	Alt	Ref	Ref	T	WT
3K193	AE WAWNG POO DOO	13.5289	99.8142	V4	Jap	Thailand	PRJNA795890	T	Ref	3	Ref	WT	Ref	Ref	del	Ref	Alt	Ref	Ref	T	WT
IRIS-10758	AEN METAN	-8.87194	121.811	V10	Jap	Indonesia	PRJNA795890	T	2	3	Ref	large	Ref	Ref	del	Ref	Alt	Ref	Ref	T	T13
IRIS-8922	AGAI 1	-3.29472	104.142	V8	Ind	Indonesia	PRJNA795890	T	Ref	Ref	Ref	WT	Ref	Ref	del	Ref	Alt	Ref	Ref	T	WT
IRIS-9423	AGUYOD	14.3333	120.833	V10	Jap	Philippines	PRJNA795890	T	2	2	Ref	1.2kb	Ref	Ref	del	Ref	Alt	Ref	Ref	T	T13
LR187	AiChuehChingYu	#N/A	#N/A	V13	Ind	Taiwan	PRJNA485658	Ming ching	Ref	2	Ref	0.95kb	Ref	1_2	del	Ref	Alt	Ref	Ref	T	T7
3K047	AI-NAN-TSAO 39	31.2167	121.45	V13	Ind	China	PRJNA795890	P	Ref	2	Ref	0.95kb	Ref	1_2	del	Ref	Alt	Ref	Ref	T	WT
UL082	Airaromu	#N/A	#N/A	V1	Jap	Taiwan	PRJNA485658	indigenous	Ref	3	Ref	1.2kb	Ref	Ref	del	glutinous	Alt	Ref	Ref	T	WT
LR186	AiTzuChung	#N/A	#N/A	V13	Ind	Taiwan	PRJNA485658	Ming ching	Ref	2	Ref	0.95kb	Ref	1_2	del	Ref	Alt	Ref	Ref	T	T7
IRIS-9723	AI-ZI-HUNG	#N/A	#N/A	V13	Ind	China	PRJNA795890	0	Ref	2	Ref	0.95kb	Ref	Ref	Rc	Ref	Alt	Ref	Ref	T	T3
3K042	ALAGUSAMBA	6.83194	81.0108	V8	Ind	Sri Lanka	PRJNA795890	T	Ref	Ref	Ref	0.95kb	Ref	Ref	Rc	Ref	Alt	qSH3	Ref	T	WT
IRIS-11330	ALAMINOS	17.9511	120.743	V12	Ind	Philippines	PRJNA795890	T	Ref	Ref	Ref	WT	Ref	1_2	del	Ref	Alt	Ref	Ref	T	WT
IRIS-11331	AMPIPIT	18.1775	120.695	V12	Ind	Philippines	PRJNA795890	T	Ref	Ref	Ref	WT	Ref	1_2	del	Ref	Alt	Ref	Ref	T	WT
IRIS-11624	ANADI white	28.2333	83.9833	V13	Ind	Nepal	PRJNA795890	T	Ref	2	Ref	0.95kb	2	1_2	del	Ref	Alt	Ref	Ref	T	WT
IRIS-10706	ANAK CHINA	2.03028	109.642	V11	Ind	Malaysia	PRJNA795890	T	Ref	Ref	Ref	WT	2	1_2	del	Ref	Alt	Ref	Ref	T	WT
IRIS-10707	ANAK DIDEK	2.03028	109.642	V11	Ind	Malaysia	PRJNA795890	T	2	Ref	Ref	0.95kb	Ref	1_2	del	Ref	Alt	Ref	Ref	T	WT
IRIS-10759	ANDEL	-7.49306	112.429	V7	Jap	Indonesia	PRJNA795890	T	Ref	3	Ref	0.95kb	Ref	Ref	del	Ref	Alt	Ref	Ref	A	T13
IRIS-11495	ANENOE	-9.82833	124.425	V10	Jap	Indonesia	PRJNA795890	T	2	2	Ref	WT	Ref	Ref	del	Ref	Alt	Ref	Ref	T	T13
IRIS-10898	ANG KANG KP	13.1	103.2	V12	Ind	Cambodia	PRJNA795890	T	Ref	3	Ref	WT	Ref	1_2	del	glutinous	Alt	Ref	Ref	T	WT
IRIS-9050	ANGKARONG	5.1	116.05	V10	Jap	Malaysia	PRJNA795890	T	Ref	2	Ref	1.2kb	Ref	Ref	del	Ref	Alt	Ref	Ref	T	T13
IRIS-8791	ARANG	#N/A	#N/A	V11	Ind	Indonesia	PRJNA795890	T	Ref	Ref	Ref	WT	Ref	1_2	del	Ref	Alt	Ref	Ref	T	T13
IRIS-10673	ARC 10843	25.5667	91.8833	V9	Aus	India	PRJNA795890	T	Ref	2	Ref	WT	Ref	1_2	Rc	Ref	Alt	qSH3	Ref	T	T13
IRIS-11277	ARC 15129	#N/A	#N/A	V9	Aus	India	PRJNA795890	0	2	2	Ref	WT	Ref	Ref	Rc	Ref	Alt	qSH3	Ref	T	WT
IRIS-12109	ARITH	10.9367	104.495	V12	Ind	Cambodia	PRJNA795890	T	Ref	Ref	Ref	WT	Ref	1_2	del	Ref	Alt	Ref	Ref	T	WT
IRIS-12147	Arng-kar Phar-ong	12.2497	105.966	V12	Ind	Cambodia	PRJNA795890	T	Ref	2	Ref	0.95kb	Ref	Ref	del	Ref	Alt	Ref	Ref	T	WT
IRIS-12148	Arn-sar Thngorn	11.1383	103.927	V12	Ind	Cambodia	PRJNA795890	T	Ref	3	Ref	WT	Ref	1_2	del	Ref	Alt	Ref	Ref	T	WT
3K155	ASE BAKKA LOMPO	-4.69	119.63	V12	Ind	Indonesia	PRJNA795890	T	Ref	Ref	Ref	0.95kb	2	1_2	del	Ref	Alt	Ref	Ref	T	WT
IRIS-10950	ASE PULU BOLONG	-2.69056	119.026	V7	Jap	Indonesia	PRJNA795890	T	Ref	3	Ref	0.95kb	Ref	1_2	del	Ref	Alt	Ref	Ref	T	T13
IRIS-11812	ASFALA	#N/A	#N/A	V12	Ind	Kenya	PRJNA795890	T	Ref	3	Ref	WT	Ref	1_2	del	Ref	Alt	Ref	Ref	T	WT
IRIS-8850	ASHMBER	24.5	90.3333	V8	Ind	Bangladesh	PRJNA795890	T	Ref	2	Ref	0.95kb	Ref	Ref	Rc	Ref	Alt	Ref	Ref	T	WT
IRIS-10760	ATJEH	1.24972	124.833	V11	Ind	Indonesia	PRJNA795890	T	2	Ref	Ref	WT	Ref	1_2	del	Ref	Alt	Ref	Ref	T	T13
IRIS-12142	ATT CHHMOUS	12.4094	106.756	V12	Ind	Cambodia	PRJNA795890	T	Ref	Ref	Ref	WT	Ref	1_2	del	Ref	Alt	Ref	Ref	T	WT
IRIS-11054	AUS 295	23.6117	90.3397	V9	Aus	Bangladesh	PRJNA795890	P	Ref	2	Ref	WT	Ref	Ref	Rc	Ref	Alt	qSH3	Ref	C	T13
IRIS-11056	AUS 301	23.6117	90.3397	V9	Aus	Bangladesh	PRJNA795890	P	Ref	2	Ref	WT	Ref	Ref	Rc	Ref	Alt	qSH3	Ref	T	T13
IRIS-11057	AUS 308	23.6117	90.3397	V9	Aus	Bangladesh	PRJNA795890	P	Ref	2	Ref	WT	Ref	Ref	Rc	Ref	Alt	qSH3	Ref	C	T13
Azucena	Azucena	#N/A	#N/A	V10	Jap	Philippines	PRJNA424001	0	Ref	3	Ref	WT	Ref	Ref	del	Ref	Alt	Ref	Ref	T	T13
IRIS-11895	BA TUC RAN	16.4728	106.661	V12	Ind	VietNam	PRJNA795890	T	Ref	Ref	Ref	0.95kb	Ref	1_2	del	Ref	Alt	Ref	Ref	T	WT
IRIS-12070	BABELIONG	5	116.833	V10	Jap	Malaysia	PRJNA795890	T	Ref	3	Ref	WT	Ref	Ref	del	Ref	Alt	Ref	Ref	T	T13
IRIS-10837	BACK KYUNG ZO	35.8592	127.336	V2	Jap	South Korea	PRJNA795890	T	Ref	Ref	Ref	1.2kb	Ref	Ref	del	Ref	Alt	Ref	Ref	A	WT
3K156	BADAL	23.6117	90.3397	V8	Ind	Bangladesh	PRJNA795890	T	Ref	2	Ref	0.95kb	Ref	1_2	del	Ref	Alt	Ref	Ref	T	WT
IRIS-9403	BADUIE	26.8511	83.4933	V8	Ind	India	PRJNA795890	T	Ref	Ref	Ref	WT	Ref	Ref	del	Ref	Alt	Ref	Ref	T	WT
IRIS-11704	BAHN DAENG	14.3492	100.559	V12	Ind	Thailand	PRJNA795890	T	Ref	Ref	Ref	WT	2	1_2	del	Ref	Alt	Ref	Ref	T	WT
IRIS-9117	BAJAR KUNING PAHIT	-3.1225	115.905	V11	Ind	Indonesia	PRJNA795890	T	Ref	Ref	Ref	WT	Ref	1_2	del	Ref	Alt	Ref	Ref	T	WT
IRIS-10761	BALIK SEMAH	-6.75	107.5	V7	Jap	Indonesia	PRJNA795890	T	Ref	3	Ref	large	Ref	Ref	del	Ref	Alt	Ref	Ref	A	WT
IRIS-8637	BALINGMI	27.2667	91.3667	V4	Jap	Bhutan	PRJNA795890	T	Ref	Ref	Ref	1.2kb	Ref	Ref	del	Ref	Alt	Ref	Ref	A	WT
IRIS-11496	BALU PRIA	-8.41528	117.239	V7	Jap	Indonesia	PRJNA795890	T	Ref	3	Ref	large	Ref	Ref	del	Ref	Alt	Ref	Ref	T	WT
IRIS-11020	BAMLA SUFFAID 320	30.3958	69.3625	V9	Aus	Pakistan	PRJNA795890	T	Ref	Ref	Ref	WT	Ref	1_2	Rc	Ref	Alt	qSH3	Ref	C	T13
IRIS-12323	BAN KEO	#N/A	#N/A	V4	Jap	Laos	PRJNA795890	T	Ref	3	2	1.2kb	Ref	Ref	del	glutinous	Alt	Ref	Ref	T	WT
UL092	Banadoion	#N/A	#N/A	V10	Jap	Taiwan	PRJNA485658	indigenous	Ref	2	Ref	1.2kb	Ref	Ref	del	Ref	Alt	Ref	Ref	A	T19
IRIS-10942	BANDANG BUNGKUAKLAN	-1.22333	100.448	V11	Ind	Indonesia	PRJNA795890	T	Ref	Ref	Ref	WT	Ref	1_2	del	Ref	Alt	Ref	Ref	T	WT
IRIS-10762	BANDI	0.70417	101.934	V11	Ind	Indonesia	PRJNA795890	T	2	Ref	Ref	0.95kb	2	1_2	del	Ref	Alt	Ref	Ref	T	T7
IRIS-11472	BANGBANG	16.5786	120.825	V12	Ind	Philippines	PRJNA795890	T	2	3	Ref	1.2kb	Ref	1_2	del	Ref	Alt	Ref	Ref	T	WT
IRIS-11561	BANGLA	27.2117	84.7378	V8	Ind	Nepal	PRJNA795890	T	Ref	3	Ref	WT	Ref	Ref	Rc	Ref	Alt	Ref	Ref	T	WT
IRIS-8988	BANIKAT	21.3333	79.4833	V8	Ind	India	PRJNA795890	T	Ref	2	Ref	WT	Ref	Ref	del	Ref	Alt	Ref	Ref	T	T20
IRIS-8626	BANJANG	2.47583	114.286	V10	Jap	Malaysia	PRJNA795890	T	Ref	2	Ref	large	Ref	Ref	del	Ref	Alt	Ref	Ref	A	T13
IRIS-11448	BARAMANJ	26.905	75.8011	V12	Ind	India	PRJNA795890	T	Ref	2	Ref	0.95kb	Ref	1_2	del	Ref	Alt	Ref	Ref	T	T13
IRIS-11454	BARI SUTAR	23.55	74.45	V9	Aus	India	PRJNA795890	T	Ref	Ref	Ref	WT	Ref	Ref	Rc	Ref	Alt	qSH3	Ref	C	T13
UL064	Baridon	#N/A	#N/A	V6	Ind	Taiwan	PRJNA485658	indigenous	Ref	Ref	Ref	0.95kb	Ref	1_2	del	glutinous	Ref	Ref	Ref	T	WT
IRIS-9384	BARIK KUDI	15.5839	73.8553	V8	Ind	India	PRJNA795890	T	2	Ref	Ref	WT	Ref	Ref	del	Ref	Alt	Ref	Ref	T	WT
IRIS-11997	BARUM	12.1019	105.228	V12	Ind	Cambodia	PRJNA795890	T	Ref	Ref	Ref	0.95kb	Ref	1_2	del	Ref	Alt	Ref	Ref	T	WT
IRIS-8963	BATHURI	22.75	91.6667	V9	Aus	Bangladesh	PRJNA795890	T	Ref	2	Ref	0.95kb	Ref	Ref	Rc	Ref	Alt	het	Ref	C	T13
IRIS-8312	BATU	5.28333	115.7	V11	Ind	Malaysia	PRJNA795890	T	Ref	Ref	Ref	0.95kb	Ref	1_2	del	Ref	Alt	Ref	Ref	T	WT
CX352	BD 007	#N/A	#N/A	V10	Jap	China	PRJNA795890	P	2	3	Ref	WT	Ref	Ref	del	glutinous	Alt	Ref	Ref	T	T13
IRIS-11024	BEGMI 135	30.3958	69.3625	V9	Aus	Pakistan	PRJNA795890	T	Ref	Ref	Ref	WT	Ref	Ref	Rc	Ref	Alt	qSH3	Ref	C	T13
3K077	BENA JHUPI	#N/A	#N/A	V9	Aus	India	PRJNA795890	0	Ref	2	Ref	WT	Ref	1_2	Rc	Ref	Alt	Ref	Ref	T	WT
IRIS-11674	BEUA KAE	16.8839	99.125	V12	Ind	Thailand	PRJNA795890	T	Ref	3	Ref	WT	Ref	Ref	del	Ref	Alt	Ref	Ref	T	WT
IRIS-8314	BEUREUM MEULIT	-6.75	107.5	V7	Jap	Indonesia	PRJNA795890	T	Ref	3	Ref	0.95kb	Ref	Ref	Rc	Ref	Alt	Ref	Ref	A	T13
IRIS-8321	BHADOIA 303	#N/A	#N/A	V9	Aus	Bangladesh	PRJNA795890	P	2	2	Ref	WT	Ref	Ref	Rc	Ref	Alt	qSH3	Ref	T	WT
IRIS-9067	BHOJON KOLPO	23.6117	90.3397	V8	Ind	Bangladesh	PRJNA795890	T	Ref	2	Ref	WT	Ref	Ref	Rc	Ref	Alt	Ref	Ref	T	WT
3K206	BHONDU PAREWA	21.1278	82.8006	V8	Ind	India	PRJNA795890	T	Ref	Ref	Ref	WT	Ref	Ref	del	Ref	Alt	Ref	Ref	T	WT
IRIS-11823	BHU BHUSI	21.1278	82.8006	V8	Ind	India	PRJNA795890	T	Ref	Ref	Ref	WT	Ref	1_2	del	Ref	Alt	Ref	Ref	T	WT
IRIS-9054	BIDAPIK	4.02694	96.6297	V11	Ind	Indonesia	PRJNA795890	T	Ref	Ref	Ref	0.95kb	Ref	1_2	del	Ref	Alt	Ref	Ref	T	WT
3K123	BIJULI BATI	26.9875	85.3269	V8	Ind	Nepal	PRJNA795890	T	Ref	Ref	Ref	0.95kb	Ref	Ref	Rc	Ref	Alt	Ref	Ref	T	WT
3K100	BIKYAT	9.96167	118.619	V10	Jap	Philippines	PRJNA795890	T	Ref	3	Ref	1.2kb	Ref	Ref	del	glutinous	Alt	Ref	Ref	T	T13
3K169	BINARITOS	9.58639	118.391	V10	Jap	Philippines	PRJNA795890	T	Ref	3	Ref	WT	Ref	Ref	del	Ref	Alt	Ref	Ref	A	T13
IRIS-11481	BINNAFUL	24.2917	89.41	V9	Aus	Bangladesh	PRJNA795890	T	Ref	2	Ref	WT	Ref	Ref	Rc	Ref	Alt	qSH3	Ref	C	T13
IRIS-11114	BIRUI SAIL	23.6117	90.3397	V8	Ind	Bangladesh	PRJNA795890	T	Ref	Ref	Ref	WT	Ref	1_2	Rc	Ref	Alt	Ref	Ref	T	WT
3K216	BLAU BLA	22.5	103.667	V2	Jap	VietNam	PRJNA795890	T	Ref	3	Ref	1.2kb	Ref	Ref	del	glutinous	Alt	Ref	Ref	A	WT
3K217	BLICCA	18.0522	121.43	V10	Jap	Philippines	PRJNA795890	T	2	3	Ref	WT	Ref	Ref	Rc	Ref	Alt	Ref	Ref	T	T13
IRIS-8431	BOCAO	17.75	121.25	V10	Jap	Philippines	PRJNA795890	T	Ref	3	Ref	large	Ref	Ref	del	Ref	Alt	Ref	Ref	T	T13
UL047	Bohai	#N/A	#N/A	V2	Jap	Taiwan	PRJNA485658	indigenous	2	3	Ref	1.2kb	Ref	Ref	del	Ref	Alt	Ref	Ref	A	T19
IRIS-9637	BONG BOI	16.4728	106.661	V12	Ind	VietNam	PRJNA795890	T	Ref	Ref	Ref	0.95kb	Ref	1_2	del	Ref	Alt	Ref	Ref	T	WT
IRIS-11482	BONGEZA	23.4828	90.0547	V9	Aus	Bangladesh	PRJNA795890	T	Ref	2	Ref	WT	Ref	Ref	Rc	Ref	Alt	qSH3	Ref	C	WT
3K207	BONGOLON	6.2	116.233	V11	Ind	Malaysia	PRJNA795890	T	Ref	Ref	Ref	0.95kb	Ref	1_2	del	Ref	Alt	Ref	Ref	T	WT
3K201	BOO MAE	6.53972	101.281	V11	Ind	Thailand	PRJNA795890	T	2	Ref	Ref	0.95kb	Ref	1_2	del	Ref	Alt	Ref	Ref	T	WT
IRIS-10979	BORA DIGA	23.6117	90.3397	V9	Aus	Bangladesh	PRJNA795890	T	Ref	2	Ref	WT	Ref	Ref	Rc	Ref	Alt	qSH3	Ref	C	WT
IRIS-11065	BORO 394	23.6117	90.3397	V9	Aus	Bangladesh	PRJNA795890	P	Ref	Ref	Ref	WT	Ref	Ref	Rc	Ref	Alt	qSH3	Ref	het	T13
IRIS-11063	BORO 70-2	23.6117	90.3397	V9	Aus	Bangladesh	PRJNA795890	P	Ref	Ref	Ref	WT	Ref	Ref	Rc	Ref	Alt	qSH3	Ref	C	T13
IRIS-11483	BOTESHSHORE	23.1753	90.2072	V9	Aus	Bangladesh	PRJNA795890	T	Ref	2	Ref	0.95kb	2	1_2	Rc	Ref	Alt	qSH3	Ref	C	T13
IRIS-11013	BOTESWAR 2	23.6117	90.3397	V9	Aus	Bangladesh	PRJNA795890	T	Ref	2	Ref	0.95kb	Ref	1_2	Rc	Ref	Alt	qSH3	Ref	C	T13
IRIS-10041	BOTOHAVANA MENA	#N/A	#N/A	V10	Jap	Madagascar	PRJNA795890	T	Ref	3	Ref	WT	Ref	Ref	del	Ref	Alt	Ref	Ref	T	T13
IRIS-9697	BOW SU SO	7.46667	99.6833	V11	Ind	Thailand	PRJNA795890	T	Ref	Ref	Ref	WT	Ref	1_2	del	Ref	Alt	Ref	Ref	T	WT
BR28	BR28	#N/A	#N/A	V11	Ind	Bangladesh	PRJNA485658	0	Ref	Ref	Ref	0.95kb	Ref	Ref	del	Ref	Alt	Ref	Ref	T	T7
3K170	BUAGKOG	7.10861	124.945	V10	Jap	Philippines	PRJNA795890	T	Ref	2	Ref	WT	Ref	Ref	del	Ref	Alt	Ref	Ref	T	T13
IRIS-8948	BUCAYAB	16.6767	120.49	V12	Ind	Philippines	PRJNA795890	T	Ref	Ref	Ref	0.95kb	Ref	1_2	del	Ref	Alt	Ref	Ref	T	WT
3K118	BUE GA WA	13.0394	101.492	V4	Jap	Thailand	PRJNA795890	T	Ref	3	Ref	1.2kb	Ref	Ref	del	Ref	Alt	Ref	Ref	T	WT
3K171	BUENG MONG LENG WE	13.5289	99.8142	V4	Jap	Thailand	PRJNA795890	T	Ref	Ref	Ref	WT	Ref	Ref	del	Ref	Alt	Ref	Ref	T	WT
IRIS-10699	BUJANG	2.03028	109.642	V11	Ind	Malaysia	PRJNA795890	T	Ref	Ref	Ref	0.95kb	Ref	1_2	del	Ref	Alt	Ref	Ref	T	WT
IRIS-11970	BUNTU DOMBA 1	-4.69	119.63	V10	Jap	Indonesia	PRJNA795890	T	2	3	Ref	WT	Ref	Ref	del	Ref	Alt	Ref	Ref	A	T13
3K218	BURI-BURING	9.58639	118.391	V10	Jap	Philippines	PRJNA795890	T	Ref	3	Ref	WT	Ref	Ref	del	Ref	Alt	Ref	Ref	A	T13
UL030	Burieuraozu	#N/A	#N/A	V2	Jap	Taiwan	PRJNA485658	indigenous	Ref	Ref	Ref	WT	Ref	Ref	del	Ref	Alt	Ref	Ref	A	WT
3K172	BUSIYETAN	16.2594	121.113	V10	Jap	Philippines	PRJNA795890	T	2	3	Ref	WT	Ref	Ref	del	Ref	Alt	Ref	Ref	A	T13
IRIS-12045	BUYAN	0.5	112	V10	Jap	Indonesia	PRJNA795890	T	Ref	3	Ref	WT	Ref	Ref	Rc	Ref	Alt	Ref	Ref	A	T13
IRIS-11946	BWANGA MOUI	#N/A	#N/A	V10	Jap	Burkina Faso	PRJNA795890	T	Ref	3	Ref	WT	Ref	Ref	del	Ref	Alt	Ref	Ref	T	T13
3K063	C 166-135	#N/A	#N/A	V11	Ind	Philippines	PRJNA795890	I	Ref	3	Ref	WT	Ref	Ref	del	Ref	Alt	Ref	Ref	T	T7
LR113	C 662083	23.87	123.46	V12	Ind	Taiwan	PRJNA485658	breeding	2	3	Ref	WT	Ref	1_2	del	Ref	Alt	Ref	Ref	T	T7
IRIS-11896	CA HIM	16.4728	106.661	V12	Ind	VietNam	PRJNA795890	T	2	3	Ref	0.95kb	Ref	1_2	del	Ref	Alt	Ref	Ref	T	WT
IRIS-11379	CADIDIT	10.6625	123.036	V10	Jap	Philippines	PRJNA795890	T	Ref	3	Ref	WT	Ref	Ref	del	glutinous	Alt	Ref	Ref	A	T13
3K208	CADUNG SO BLOC 1	#N/A	#N/A	V12	Ind	VietNam	PRJNA795890	T	Ref	2	Ref	0.95kb	Ref	1_2	del	Ref	Alt	Ref	Ref	T	WT
IRIS-9097	CANTIK PAUN	5.5	95.3333	V11	Ind	Indonesia	PRJNA795890	T	Ref	2	Ref	0.95kb	Ref	1_2	del	Ref	Alt	Ref	Ref	T	WT
IRIS-11380	CA-ONG	11.4144	125.141	V10	Jap	Philippines	PRJNA795890	T	Ref	Ref	Ref	1.2kb	Ref	Ref	del	Ref	Alt	Ref	Ref	het	T13
IRIS-11464	CARAWI	8.585	125.801	V10	Jap	Philippines	PRJNA795890	T	2	3	Ref	WT	Ref	Ref	del	Ref	Alt	Ref	Ref	A	T13
UL126	CD1	23.91	120.81	V1	Jap	Taiwan	PRJNA485658	indigenous	Ref	3	3	1.2kb	Ref	Ref	Rc	glutinous	Alt	Ref	Ref	A	WT
UL132	CD10	23.91	120.81	V1	Jap	Taiwan	PRJNA485658	indigenous	Ref	3	3	1.2kb	Ref	Ref	del	glutinous	Alt	Ref	Ref	A	WT
UL133	CD12	23.91	120.81	V1	Jap	Taiwan	PRJNA485658	indigenous	Ref	3	Ref	1.2kb	Ref	Ref	Rc	glutinous	Alt	Ref	Ref	T	WT
UL134	CD13	23.91	120.81	V1	Jap	Taiwan	PRJNA485658	indigenous	2	3	Ref	1.2kb	Ref	Ref	Rc	glutinous	Alt	Ref	Ref	T	WT
UL127	CD2	23.91	120.81	V1	Jap	Taiwan	PRJNA485658	indigenous	Ref	3	3	1.2kb	Ref	Ref	Rc	glutinous	Alt	Ref	Ref	A	WT
UL217	CD4	23.91	120.81	V1	Jap	Taiwan	PRJNA485658	indigenous	Ref	Ref	3	1.2kb	Ref	Ref	del	glutinous	Alt	Ref	Ref	A	WT
UL128	CD5	23.91	120.81	V6	Ind	Taiwan	PRJNA485658	indigenous	Ref	3	Ref	0.95kb	Ref	1_2	Rc	Ref	Alt	Ref	Ref	T	WT
UL129	CD7	23.91	120.81	V1	Jap	Taiwan	PRJNA485658	indigenous	Ref	3	Ref	1.2kb	Ref	Ref	Rc	glutinous	Alt	Ref	Ref	T	WT
UL130	CD8	23.91	120.81	V1	Jap	Taiwan	PRJNA485658	indigenous	Ref	3	Ref	1.2kb	Ref	Ref	Rc	glutinous	Alt	Ref	Ref	T	WT
UL131	CD9	23.91	120.81	V1	Jap	Taiwan	PRJNA485658	indigenous	Ref	3	3	1.2kb	Ref	Ref	del	glutinous	Alt	Ref	Ref	A	WT
IRIS-11182	CEMPO CINA	-2.69056	119.026	V11	Ind	Indonesia	PRJNA795890	T	2	Ref	Ref	WT	Ref	1_2	del	Ref	Alt	Ref	Ref	T	T13
IRIS-10997	CEMPO MANGGAR	-2.69056	119.026	V11	Ind	Indonesia	PRJNA795890	T	Ref	Ref	Ref	WT	Ref	1_2	del	Ref	Alt	Ref	Ref	T	T13
IRIS-10765	CERE KAWAT	-6.75	107.5	V7	Jap	Indonesia	PRJNA795890	T	2	3	Ref	0.95kb	Ref	Ref	del	Ref	Alt	Ref	Ref	T	WT
IRIS-12121	CHA LIENG	14.7456	106.954	V12	Ind	Laos	PRJNA795890	T	Ref	3	Ref	WT	Ref	Ref	del	Ref	Alt	Ref	Ref	T	WT
3K173	CHABLI CHABOL GLANG	13.0394	101.492	V4	Jap	Thailand	PRJNA795890	T	Ref	3	2	1.2kb	Ref	Ref	del	glutinous	Alt	Ref	Ref	T	WT
IRIS-11014	CHAKILA	24.5	90.3333	V9	Aus	Bangladesh	PRJNA795890	T	Ref	2	Ref	WT	Ref	1_2	Rc	Ref	Alt	qSH3	Ref	C	T13
IRIS-8854	CHAKOL	22.5	91.8333	V12	Ind	Bangladesh	PRJNA795890	T	Ref	Ref	Ref	0.95kb	Ref	Ref	del	Ref	Alt	Ref	Ref	T	WT
IRIS-10092	CHALBYEO	35.3	128.783	V2	Jap	South Korea	PRJNA795890	T	Ref	Ref	Ref	1.2kb	Ref	Ref	del	glutinous	Alt	Ref	Ref	A	WT
IRIS-10046	CHAMA	#N/A	#N/A	V8	Ind	Zambia	PRJNA795890	T	Ref	Ref	Ref	WT	Ref	1_2	del	Ref	Alt	Ref	Ref	T	T13
IRIS-10450	CHAN KU	35.86	104.166	V13	Ind	China	PRJNA795890	T	Ref	Ref	Ref	0.95kb	2	1_2	del	Ref	Alt	Ref	Ref	T	T7
IRIS-12036	CHAN LEUY	13.8511	106.155	V12	Ind	Cambodia	PRJNA795890	T	Ref	3	Ref	WT	Ref	Ref	del	Ref	Alt	Ref	Ref	T	WT
IRIS-9368	CHANDARHAT	23.25	89.3333	V9	Aus	Bangladesh	PRJNA795890	T	2	2	Ref	0.95kb	Ref	Ref	Rc	Ref	Alt	qSH3	Ref	C	T13
IRIS-9917	CHANDINA	7.87694	80.7	V8	Ind	Sri Lanka	PRJNA795890	T	Ref	Ref	Ref	0.95kb	Ref	Ref	del	Ref	Alt	Ref	Ref	T	WT
IRIS-10700	CHANTEK 145	2.03028	109.642	V11	Ind	Malaysia	PRJNA795890	T	Ref	Ref	Ref	large	Ref	1_2	del	Ref	Alt	Ref	Ref	T	WT
IRIS-11992	Chao lao soung	20.6117	101.947	V12	Ind	Laos	PRJNA795890	T	Ref	3	Ref	WT	Ref	1_2	del	Ref	Alt	Ref	Ref	T	WT
IRIS-11072	Chao lep nok	18.2803	103.861	V12	Ind	Laos	PRJNA795890	T	2	3	Ref	WT	2	1_2	del	Ref	Alt	Ref	Ref	T	WT
IRIS-12029	Chao meo	19.8833	102.133	V4	Jap	Laos	PRJNA795890	T	Ref	3	Ref	WT	Ref	Ref	del	Ref	Alt	Ref	Ref	T	T12
IRIS-12330	CHAO PEE	#N/A	#N/A	V4	Jap	Laos	PRJNA795890	T	Ref	3	Ref	WT	Ref	Ref	del	Ref	Alt	Ref	Ref	T	WT
IRIS-10652	Chao peuak deng	17.9628	102.614	V12	Ind	Laos	PRJNA795890	T	Ref	3	Ref	WT	Ref	Ref	del	Ref	Alt	Ref	Ref	T	WT
3K174	CHATAO	#N/A	#N/A	V10	Jap	Brazil	PRJNA795890	T	Ref	2	Ref	1.2kb	Ref	Ref	del	Ref	Alt	Ref	Ref	T	T13
IRIS-8466	CHAW GAM PRUED	8.41833	99.9633	V11	Ind	Thailand	PRJNA795890	T	Ref	3	Ref	WT	Ref	1_2	del	Ref	Alt	Ref	Ref	T	WT
IRIS-12005	CHE MAH	2.03028	109.642	V11	Ind	Malaysia	PRJNA795890	T	2	Ref	Ref	0.95kb	Ref	1_2	del	Ref	Alt	Ref	Ref	T	WT
IRIS-10093	CHEONJUDO	35.2094	128.538	V2	Jap	South Korea	PRJNA795890	T	2	Ref	Ref	1.2kb	Ref	Ref	del	Ref	Ref	Ref	Ref	A	WT
CN17	CHIANAN 17	23.87	123.46	V2	Jap	Taiwan	PRJNA485658	Modern variety	Ref	Ref	Ref	1.2kb	Ref	Ref	del	Ref	Alt	Ref	Ref	A	T19
CN8	CHIANAN 8	23.87	123.46	V2	Jap	Taiwan	PRJNA485658	Modern variety	Ref	Ref	Ref	1.2kb	Ref	Ref	del	Ref	Alt	Ref	Ref	A	T19
CNY280	Chianung Yu 280	23.87	123.46	V2	Jap	Taiwan	PRJNA485658	breeding	Ref	Ref	Ref	1.2kb	Ref	Ref	del	Ref	Alt	Ref	Ref	A	T19
LR117	CHIAYI-WU-KO	23.87	123.46	V13	Ind	Taiwan	PRJNA485658	Ming ching	Ref	2	Ref	0.95kb	Ref	1_2	del	Ref	Alt	Ref	Ref	T	T3
3K101	CHIH SHEN LI	35.86	104.166	V13	Ind	China	PRJNA795890	T	Ref	Ref	Ref	0.95kb	2	1_2	del	Ref	Alt	Ref	Ref	T	T3
LR118	CHING-CHUNG	#N/A	#N/A	V6	Ind	Taiwan	PRJNA485658	Ming ching	Ref	Ref	Ref	0.95kb	Ref	1_2	del	Ref	Alt	Ref	Ref	T	WT
LR241	ching-kao-an	#N/A	#N/A	V6	Ind	Taiwan	PRJNA485658	Ming ching	Ref	Ref	Ref	0.95kb	Ref	1_2	del	Ref	Alt	Ref	Ref	T	WT
LR175	ChingKuoChan	#N/A	#N/A	V13	Ind	Taiwan	PRJNA623980	Ming ching	Ref	2	Ref	0.95kb	Ref	1_2	del	Ref	Alt	Ref	Ref	T	T3
LR119	CHING-LIU	#N/A	#N/A	V6	Ind	Taiwan	PRJNA485658	Ming ching	Ref	Ref	Ref	0.95kb	Ref	1_2	del	Ref	Alt	Ref	Ref	T	WT
LR192	Ching-Yu-Chu	#N/A	#N/A	V6	Ind	Taiwan	PRJNA485658	Ming ching	Ref	Ref	Ref	0.95kb	Ref	1_2	del	Ref	Alt	Ref	Ref	T	WT
IRIS-10071	CHIYODA WASE	34.7839	134.375	V5	Jap	Japan	PRJNA795890	T	2	Ref	Ref	1.2kb	Ref	Ref	del	Ref	Alt	Ref	Ref	T	WT
IRIS-11991	CHON	20.4919	101.889	V12	Ind	Laos	PRJNA795890	T	Ref	3	Ref	WT	Ref	1_2	del	Ref	Alt	Ref	Ref	T	WT
UL055	ChuanNo2	#N/A	#N/A	V4	Jap	Taiwan	PRJNA485658	indigenous	2	3	Ref	WT	Ref	Ref	del	Ref	Alt	Ref	Ref	A	WT
UL056	ChuanNo3	#N/A	#N/A	V4	Jap	Taiwan	PRJNA485658	indigenous	2	3	Ref	WT	Ref	Ref	del	Ref	Alt	Ref	Ref	A	WT
UL057	ChuanNo4	#N/A	#N/A	V4	Jap	Taiwan	PRJNA373799	indigenous	Ref	3	Ref	WT	Ref	Ref	del	glutinous	Alt	Ref	Ref	A	WT
IRIS-11737	CHUNDI	21.2997	80.9294	V9	Aus	India	PRJNA795890	T	Ref	Ref	Ref	0.95kb	Ref	1_2	Rc	Ref	Alt	Ref	Ref	T	T13
3K102	CHUNG YI	#N/A	#N/A	V2	Jap	China	PRJNA795890	T	Ref	Ref	Ref	1.2kb	Ref	Ref	del	Ref	Alt	Ref	Ref	A	WT
IRIS-9422	CHUNGUR BALI	25.1167	92.0833	V9	Aus	Bangladesh	PRJNA795890	T	1	Ref	Ref	WT	Ref	1_2	Rc	Ref	Alt	qSH3	Ref	T	T13
LR018	Chu-Tzu	#N/A	#N/A	V6	Ind	Taiwan	PRJNA485658	Ming ching	Ref	Ref	Ref	0.95kb	Ref	1_2	del	Ref	Alt	Ref	Ref	T	WT
IRIS-11311	CICIH KAPUK	-8.455	115.072	V7	Jap	Indonesia	PRJNA795890	T	Ref	Ref	Ref	large	Ref	Ref	del	Ref	Alt	Ref	Ref	T	T13
3K050	CRILLO LA FRIA	#N/A	#N/A	V13	Ind	Venezuela	PRJNA795890	P	Ref	Ref	Ref	0.95kb	2	Ref	del	Ref	Alt	Ref	Ref	T	T3
UL144	CSred	23.91	120.81	V6	Ind	Taiwan	PRJNA485658	indigenous	Ref	3	Ref	0.95kb	Ref	1_2	Rc	Ref	Ref	Ref	Ref	T	WT
IRIS-8514	DAA MANSA	#N/A	#N/A	V11	Ind	Ghana	PRJNA795890	T	2	3	Ref	0.95kb	Ref	1_2	del	Ref	Alt	Ref	Ref	T	T7
IRIS-10059	DACHEONGBYEO	#N/A	#N/A	V2	Jap	South Korea	PRJNA795890	0	2	Ref	Ref	1.2kb	Ref	Ref	del	Ref	Alt	Ref	Ref	T	WT
IRIS-9529	DAGPA BARA	27.5	91.7333	V4	Jap	Bhutan	PRJNA795890	T	Ref	Ref	Ref	1.2kb	Ref	Ref	Rc	Ref	Alt	Ref	Ref	A	WT
3K119	DAGPA MRAS	27.6667	91.1667	V4	Jap	Bhutan	PRJNA795890	T	Ref	Ref	Ref	WT	Ref	Ref	Rc	Ref	Alt	Ref	Ref	A	WT
IRIS-8643	DAJA	-1.37556	113.29	V11	Ind	Indonesia	PRJNA795890	T	Ref	Ref	Ref	0.95kb	Ref	1_2	del	Ref	Alt	Ref	Ref	T	WT
3K113	DAM	13.0394	101.492	V4	Jap	Thailand	PRJNA795890	T	Ref	3	Ref	WT	Ref	Ref	Rc	Ref	Alt	Ref	Ref	T	WT
IRIS-12152	Damm-noeb Thngorn	13.5719	102.917	V12	Ind	Cambodia	PRJNA795890	T	Ref	3	Ref	WT	Ref	1_2	del	glutinous	Alt	Ref	Ref	T	WT
IRIS-11998	DAMNOEUB KAUN KHMOM	11.4306	105.778	V12	Ind	Cambodia	PRJNA795890	T	Ref	Ref	Ref	0.95kb	Ref	1_2	del	glutinous	Alt	Ref	Ref	T	WT
3K157	DAMNOEUB KHSE SAUT	11.41	105.331	V12	Ind	Cambodia	PRJNA795890	T	Ref	2	Ref	0.95kb	2	1_2	del	glutinous	Alt	Ref	Ref	T	WT
IRIS-12151	DAMNOEUB KRACHAK SESS	11.0581	104.707	V12	Ind	Cambodia	PRJNA795890	T	Ref	3	Ref	WT	Ref	1_2	del	Ref	Alt	Ref	Ref	T	WT
3K203	DAMNOEUB POR HING	11.41	105.331	V12	Ind	Cambodia	PRJNA795890	T	Ref	2	Ref	0.95kb	2	1_2	del	glutinous	Alt	Ref	Ref	T	WT
3K158	DAMNOEUB THPOIL HING	11.41	105.331	V12	Ind	Cambodia	PRJNA795890	T	Ref	Ref	Ref	WT	Ref	1_2	del	Ref	Alt	Ref	Ref	T	WT
IRIS-9610	DANGAR	23.6667	73	V9	Aus	India	PRJNA795890	T	Ref	Ref	Ref	WT	Ref	Ref	Rc	Ref	Alt	qSH3	Ref	C	WT
IRIS-10079	DANGO MOCHI	34.7839	134.375	V5	Jap	Japan	PRJNA795890	T	Ref	Ref	Ref	1.2kb	Ref	Ref	del	het	Alt	Ref	Ref	T	WT
IRIS-11700	DAW NOK KAEN	18.145	100.141	V12	Ind	Thailand	PRJNA795890	T	Ref	3	Ref	0.95kb	Ref	Ref	del	glutinous	Alt	Ref	Ref	T	WT
IRIS-11705	DAWK PUD KHAO	18.145	100.141	V12	Ind	Thailand	PRJNA795890	T	Ref	3	Ref	0.95kb	Ref	Ref	del	glutinous	Alt	Ref	Ref	T	WT
3K124	DAYRON MARANGRAS	9.44611	118.393	V10	Jap	Philippines	PRJNA795890	T	2	2	Ref	WT	Ref	Ref	del	Ref	Alt	Ref	Ref	T	T13
IRIS-11689	DECHANGBYEO	#N/A	#N/A	V2	Jap	South Korea	PRJNA795890	0	Ref	Ref	Ref	1.2kb	Ref	Ref	del	Ref	Ref	Ref	Ref	A	WT
LR171	Dee-Geo-Woo-Gen	#N/A	#N/A	V13	Ind	Taiwan	PRJNA485658	Ming ching	Ref	2	Ref	0.95kb	Ref	1_2	del	Ref	Alt	Ref	Ref	T	T7
3K220	DEO-KITAN	16.9736	121.236	V7	Jap	Philippines	PRJNA795890	T	Ref	3	Ref	0.95kb	Ref	Ref	del	glutinous	Alt	Ref	Ref	A	T13
IRIS-11671	DERAWA	28.3667	81.4097	V8	Ind	Nepal	PRJNA795890	T	Ref	Ref	Ref	WT	Ref	Ref	del	Ref	Alt	Ref	Ref	T	WT
IRIS-11025	DHAN 263	30.3958	69.3625	V9	Aus	Pakistan	PRJNA795890	T	Ref	2	Ref	WT	Ref	1_2	Rc	Ref	Alt	qSH3	Ref	C	WT
IRIS-8530	DHANE BURWA	21.1278	82.8006	V8	Ind	India	PRJNA795890	T	Ref	2	Ref	0.95kb	Ref	Ref	del	Ref	Alt	Ref	Ref	C	WT
IRIS-11824	DHANIYA PHOOL	21.1278	82.8006	V8	Ind	India	PRJNA795890	T	Ref	Ref	Ref	0.95kb	Ref	Ref	del	Ref	Alt	Ref	Ref	T	WT
IRIS-11525	DIAMBARANG	#N/A	#N/A	V12	Ind	Guinea-Bissau	PRJNA795890	T	2	3	Ref	WT	Ref	Ref	del	Ref	Alt	Ref	Ref	T	WT
IRIS-11196	DICULA	15.9906	120.142	V11	Ind	Philippines	PRJNA795890	T	Ref	Ref	Ref	0.95kb	Ref	1_2	del	Ref	Alt	Ref	Ref	T	WT
IRIS-11918	DILBAKSH	24.25	81.0833	V8	Ind	India	PRJNA795890	T	Ref	Ref	Ref	0.95kb	Ref	1_2	del	Ref	Alt	Ref	Ref	T	WT
IRIS-11334	DINGRAS	18.1775	120.695	V12	Ind	Philippines	PRJNA795890	T	Ref	Ref	Ref	WT	Ref	1_2	del	Ref	Alt	Ref	Ref	T	WT
IRIS-11465	DINORADO	13.6953	123.275	V10	Jap	Philippines	PRJNA795890	T	Ref	2	Ref	WT	Ref	Ref	Rc	Ref	Alt	Ref	Ref	T	T13
IRIS-11723	DISSIGBE	#N/A	#N/A	V8	Ind	Guinea	PRJNA795890	T	Ref	3	Ref	WT	Ref	Ref	del	Ref	Alt	Ref	Ref	T	WT
IRIS-10593	DJ47	23.6117	90.3397	V9	Aus	Bangladesh	PRJNA795890	P	Ref	2	Ref	large	Ref	Ref	Rc	Ref	Alt	qSH3	Ref	C	T13
IRIS-10766	DJALAWARA	-6.75	107.5	V7	Jap	Indonesia	PRJNA795890	T	2	3	Ref	large	Ref	Ref	het	Ref	Alt	Ref	Ref	A	WT
IRIS-10767	DJANGGOT	-4.94778	104.852	V7	Jap	Indonesia	PRJNA795890	T	Ref	3	Ref	large	Ref	Ref	del	Ref	Alt	Ref	Ref	A	WT
IRIS-12334	Do khaw	19.3194	101.69	V12	Ind	Laos	PRJNA795890	T	2	3	Ref	0.95kb	Ref	Ref	del	glutinous	Alt	Ref	Ref	T	WT
IRIS-12336	DO LEUANG	20.9497	101.721	V4	Jap	Laos	PRJNA795890	T	2	3	Ref	1.2kb	Ref	Ref	del	glutinous	Alt	Ref	Ref	T	T12
IRIS-12193	Do Nouan	17.7908	105.081	V12	Ind	Laos	PRJNA795890	T	Ref	2	Ref	0.95kb	Ref	Ref	del	glutinous	Alt	Ref	Ref	T	WT
IRIS-12015	DOGON IRI	#N/A	#N/A	V8	Ind	Nigeria	PRJNA795890	T	Ref	Ref	Ref	WT	Ref	Ref	Rc	Ref	Alt	Ref	Ref	C	WT
IRIS-12337	Dok hien noi	20.4511	101.981	V4	Jap	Laos	PRJNA795890	T	2	3	2	1.2kb	Ref	Ref	Rc	Ref	Alt	Ref	Ref	T	T12
IRIS-12258	Don	21.4933	101.83	V4	Jap	Laos	PRJNA795890	T	Ref	3	Ref	1.2kb	Ref	Ref	del	het	Alt	Ref	Ref	T	T12
IRIS-11796	DU GEN CHUAN	#N/A	#N/A	V13	Ind	China	PRJNA795890	0	Ref	Ref	Ref	WT	2	Ref	Rc	Ref	Alt	Ref	Ref	T	T3
IRIS-11908	DUAN SHEN ZI	#N/A	#N/A	V2	Jap	China	PRJNA795890	0	Ref	3	Ref	1.2kb	Ref	Ref	Rc	glutinous	Alt	Ref	Ref	A	WT
3K015	DUBRAJ	23.2497	87.85	V8	Ind	India	PRJNA795890	0	Ref	2	Ref	WT	Ref	1_2	Rc	Ref	Alt	Ref	Ref	T	WT
3K159	DUDA MONOR	23.6117	90.3397	V8	Ind	Bangladesh	PRJNA795890	T	Ref	Ref	Ref	WT	Ref	1	Rc	Ref	Alt	Ref	Ref	T	WT
IRIS-8796	DUDH KADAR	23.9833	80.3333	V8	Ind	India	PRJNA795890	T	Ref	Ref	Ref	WT	Ref	Ref	del	Ref	Alt	Ref	Ref	T	T20
IRIS-10984	DUDHSAR	23.6117	90.3397	V8	Ind	Bangladesh	PRJNA795890	T	Ref	Ref	Ref	0.95kb	Ref	1_2	het	Ref	Alt	Ref	Ref	T	WT
3K054	DUDRE	26.6164	74.2667	V8	Ind	India	PRJNA795890	0	Ref	Ref	Ref	0.95kb	Ref	Ref	Rc	Ref	Alt	Ref	Ref	T	WT
3K205	DUNA-AL	16.7706	121.096	V10	Jap	Philippines	PRJNA795890	T	Ref	3	Ref	WT	Ref	Ref	del	Ref	Alt	Ref	Ref	A	T13
IRIS-10605	DV86	23.6117	90.3397	V9	Aus	Bangladesh	PRJNA795890	P	Ref	2	Ref	WT	Ref	Ref	Rc	Ref	Alt	qSH3	Ref	C	T13
3K066	E ZI 100	#N/A	#N/A	V12	Ind	China	PRJNA795890	0	Ref	3	Ref	0.95kb	Ref	1_2	del	Ref	Alt	Ref	Ref	T	T13
3K048	E ZI 32	#N/A	#N/A	V13	Ind	China	PRJNA795890	0	Ref	3	Ref	WT	2	1_2	del	Ref	Alt	Ref	Ref	T	WT
3K078	Ea dam hang dok	18.2803	103.861	V12	Ind	Laos	PRJNA795890	T	Ref	3	Ref	0.95kb	Ref	Ref	del	glutinous	Alt	Ref	Ref	T	WT
IRIS-12260	Ea khaw ngan	15.9006	105.921	V12	Ind	Laos	PRJNA795890	T	Ref	3	Ref	0.95kb	Ref	Ref	del	glutinous	Alt	Ref	Ref	T	WT
IRIS-12194	EA POUAK	14.7456	106.954	V12	Ind	Laos	PRJNA795890	T	Ref	3	Ref	0.95kb	Ref	Ref	del	glutinous	Alt	Ref	Ref	T	WT
IRIS-11083	Ea tia	16.5006	105.75	V12	Ind	Laos	PRJNA795890	T	Ref	2	Ref	0.95kb	Ref	1_2	del	glutinous	Alt	Ref	Ref	T	WT
IRIS-12261	Ea tom	18.0342	102.595	V12	Ind	Laos	PRJNA795890	T	Ref	3	Ref	WT	Ref	Ref	del	glutinous	Alt	Ref	Ref	T	WT
LR019	EarlyFrost1	#N/A	#N/A	V6	Ind	Taiwan	PRJNA373799	Ming ching	Ref	Ref	Ref	0.95kb	Ref	1_2	del	Ref	Alt	Ref	Ref	T	T7
IRIS-8980	E-DAW HAWM	16.4325	103.507	V12	Ind	Thailand	PRJNA795890	T	Ref	3	Ref	0.95kb	Ref	Ref	del	glutinous	Alt	Ref	Ref	T	WT
IRIS-11484	EJALI	23.7272	89.5436	V9	Aus	Bangladesh	PRJNA795890	T	Ref	2	Ref	WT	2	Ref	Rc	Ref	Alt	qSH3	Ref	T	WT
IRIS-12286	EKAYIN SAW	17	97	V12	Ind	Myanmar	PRJNA795890	T	Ref	3	Ref	WT	Ref	Ref	del	Ref	Alt	Ref	Ref	T	WT
IRIS-12292	EMAHTAKYAN	12.4294	98.6075	V12	Ind	Myanmar	PRJNA795890	T	Ref	3	Ref	0.95kb	Ref	Ref	del	Ref	Alt	Ref	Ref	T	WT
3K064	E-MOOM	15.8019	104.139	V12	Ind	Thailand	PRJNA795890	T	Ref	3	Ref	0.95kb	Ref	Ref	del	glutinous	Alt	Ref	Ref	T	WT
IRIS-11677	E-NAWN KHAO	15.2292	105.855	V12	Ind	Thailand	PRJNA795890	T	Ref	3	Ref	WT	Ref	1_2	del	glutinous	Alt	Ref	Ref	T	WT
3K065	E-PLUAK	15.9717	102.622	V12	Ind	Thailand	PRJNA795890	T	Ref	3	Ref	0.95kb	Ref	Ref	del	glutinous	Alt	Ref	Ref	T	WT
IRIS-8571	ES021	#N/A	#N/A	V12	Ind	Tanzania	PRJNA795890	T	2	3	Ref	WT	Ref	1_2	del	Ref	Alt	Ref	Ref	T	WT
3K111	E-WAWNG	13.5289	99.8142	V4	Jap	Thailand	PRJNA795890	T	Ref	3	Ref	WT	Ref	Ref	del	Ref	Alt	Ref	Ref	T	WT
IRIS-10109	EX EBOKOZURU	#N/A	#N/A	V11	Ind	Nigeria	PRJNA795890	T	2	3	Ref	WT	2	1_2	del	Ref	Alt	Ref	Ref	T	WT
IRIS-10047	EX MARABA-GURUKU	#N/A	#N/A	V13	Ind	Nigeria	PRJNA795890	T	Ref	2	Ref	0.95kb	Ref	1_2	del	Ref	Alt	Ref	Ref	T	T7
IRIS-8909	FAYA MOSHI	#N/A	#N/A	V12	Ind	Tanzania	PRJNA795890	T	Ref	3	Ref	WT	Ref	1_2	del	Ref	Alt	Ref	Ref	T	WT
IRIS-11551	FELEGBASEH	#N/A	#N/A	V11	Ind	Sierra Leone	PRJNA795890	T	Ref	2	Ref	WT	Ref	1_2	Rc	Ref	Alt	Ref	Ref	T	WT
LR105	Feng Tsai Chut	#N/A	#N/A	V13	Ind	Taiwan	PRJNA485658	Ming ching	Ref	2	Ref	0.95kb	Ref	Ref	del	glutinous	Alt	Ref	Ref	T	T13
LR014	fluffy	#N/A	#N/A	V6	Ind	Taiwan	PRJNA373799	Ming ching	Ref	Ref	Ref	0.95kb	Ref	1_2	del	Ref	Alt	Ref	Ref	T	WT
IRIS-11434	FORTUNA BLANCO	#N/A	#N/A	V10	Jap	Colombia	PRJNA795890	T	2	Ref	Ref	WT	Ref	Ref	del	Ref	Alt	Ref	Ref	T	WT
IRIS-11526	FOSSA	#N/A	#N/A	V10	Jap	Cote dIvoire	PRJNA795890	T	2	3	Ref	WT	Ref	Ref	del	Ref	Alt	Ref	Ref	T	T13
IRIS-12018	FRENSI GBOI	#N/A	#N/A	V10	Jap	Sierra Leone	PRJNA795890	T	Ref	3	Ref	WT	Ref	Ref	del	Ref	Alt	Ref	Ref	T	T13
LR111	Fu-Tou-O-Luan-Chu	#N/A	#N/A	V9	Aus	Taiwan	PRJNA485658	Ming ching	Ref	2	Ref	0.95kb	Ref	1_2	Rc	Ref	Alt	qSH3	Ref	C	T13
IRIS-10768	GADABUNG	-3.1225	115.905	V11	Ind	Indonesia	PRJNA795890	T	Ref	3	Ref	0.95kb	Ref	1_2	del	Ref	Alt	Ref	Ref	T	WT
3K067	GAEW DAENG	13.0394	101.492	V12	Ind	Thailand	PRJNA795890	0	Ref	2	Ref	0.95kb	Ref	Ref	del	glutinous	Alt	Ref	Ref	T	WT
IRIS-10124	GALSAEGSSAL SHAREI	37.75	126.3	V2	Jap	South Korea	PRJNA795890	P	Ref	Ref	Ref	1.2kb	Ref	Ref	Rc	Ref	Alt	Ref	Ref	A	WT
IRIS-11635	GAM PERNG	18.7236	98.885	V12	Ind	Thailand	PRJNA795890	T	2	Ref	Ref	0.95kb	Ref	1_2	del	glutinous	Alt	Ref	Ref	T	WT
3K160	GANDAMANA	-2.69056	119.026	V7	Jap	Indonesia	PRJNA795890	T	Ref	3	Ref	WT	Ref	Ref	del	Ref	Alt	Ref	Ref	A	WT
IRIS-11321	GANDHISAIL	23.7786	90.3378	V12	Ind	Bangladesh	PRJNA795890	T	Ref	Ref	Ref	WT	Ref	1_2	Rc	Ref	Alt	Ref	Ref	T	WT
IRIS-7883	GANIGI	-0.5275	120.044	V10	Jap	Indonesia	PRJNA795890	T	2	3	Ref	1.2kb	Ref	Ref	del	Ref	Alt	Ref	Ref	T	T13
IRIS-10178	GAO JIAO BAI	#N/A	#N/A	V13	Ind	China	PRJNA795890	0	Ref	2	Ref	0.95kb	2	Ref	Rc	Ref	Alt	Ref	Ref	T	T13
IRIS-12033	GAO JIAO HONG	#N/A	#N/A	V13	Ind	China	PRJNA795890	0	Ref	2	Ref	0.95kb	Ref	1_2	Rc	Ref	Alt	Ref	Ref	T	T7
IRIS-11679	GASET BOW	16.4439	100.348	V12	Ind	Thailand	PRJNA795890	T	Ref	3	Ref	WT	Ref	Ref	del	Ref	Alt	Ref	Ref	T	WT
IRIS-10094	GAWICHAL	35.1667	128.683	V5	Jap	South Korea	PRJNA795890	T	Ref	Ref	Ref	1.2kb	Ref	Ref	del	glutinous	Alt	Ref	Ref	T	WT
GD_W01	GD_W01	#N/A	#N/A	V6	Ind	China	PRJNA295802	weedy rice	Ref	3	Ref	WT	Ref	Ref	del	Ref	Alt	Ref	Ref	T	T7
GD_W03	GD_W03	#N/A	#N/A	V6	Ind	China	PRJNA295802	weedy rice	Ref	Ref	Ref	0.95kb	Ref	1_2	Rc	Ref	Alt	Ref	SH4	T	WT
GD_W04	GD_W04	#N/A	#N/A	V6	Ind	China	PRJNA295802	weedy rice	Ref	2	Ref	0.95kb	Ref	1_2	Rc	Ref	Alt	Ref	SH4	T	T7
GD_W05	GD_W05	#N/A	#N/A	V13	Ind	China	PRJNA295802	weedy rice	Ref	2	Ref	0.95kb	Ref	1_2	Rc	Ref	Alt	Ref	SH4	T	T7
GD_W07	GD_W07	#N/A	#N/A	V6	Ind	China	PRJNA295802	weedy rice	Ref	2	Ref	WT	Ref	Ref	Rc	Ref	Alt	Ref	SH4	T	T7
GD_W08	GD_W08	#N/A	#N/A	V6	Ind	China	PRJNA295802	weedy rice	Ref	Ref	Ref	WT	Ref	Ref	Rc	Ref	Alt	Ref	Ref	T	T7
GD_W09	GD_W09	#N/A	#N/A	V6	Ind	China	PRJNA295802	weedy rice	Ref	Ref	Ref	0.95kb	Ref	1_2	Rc	Ref	Alt	Ref	SH4	T	T7
GD_W10	GD_W10	#N/A	#N/A	V6	Ind	China	PRJNA295802	weedy rice	Ref	2	Ref	0.95kb	Ref	1_2	Rc	Ref	Alt	Ref	SH4	T	T7
GD_W11	GD_W11	#N/A	#N/A	V6	Ind	China	PRJNA295802	weedy rice	Ref	2	Ref	0.95kb	Ref	1_2	Rc	Ref	Alt	Ref	SH4	T	T7
GD_W12	GD_W12	#N/A	#N/A	V6	Ind	China	PRJNA295802	weedy rice	Ref	2	Ref	0.95kb	Ref	1_2	Rc	Ref	Alt	Ref	SH4	T	T7
GD_W13	GD_W13	#N/A	#N/A	V6	Ind	China	PRJNA295802	weedy rice	Ref	2	Ref	0.95kb	Ref	1_2	Rc	Ref	Alt	Ref	SH4	T	T7
GD_W14	GD_W14	#N/A	#N/A	V6	Ind	China	PRJNA295802	weedy rice	Ref	2	Ref	0.95kb	Ref	1_2	Rc	Ref	Alt	Ref	SH4	T	T7
GD_W15	GD_W15	#N/A	#N/A	V6	Ind	China	PRJNA295802	weedy rice	Ref	2	Ref	0.95kb	Ref	Ref	Rc	Ref	Alt	Ref	Ref	T	T7
GD_W16	GD_W16	#N/A	#N/A	V6	Ind	China	PRJNA295802	weedy rice	Ref	2	Ref	WT	Ref	1_2	Rc	Ref	Alt	Ref	Ref	T	T7
GD_W17	GD_W17	#N/A	#N/A	V6	Ind	China	PRJNA295802	weedy rice	Ref	3	Ref	WT	Ref	Ref	Rc	Ref	Alt	Ref	Ref	T	T7
GD_W18	GD_W18	#N/A	#N/A	V6	Ind	China	PRJNA295802	weedy rice	Ref	3	Ref	WT	Ref	1_2	del	Ref	Alt	Ref	Ref	T	T7
GD_W19	GD_W19	#N/A	#N/A	V6	Ind	China	PRJNA295802	weedy rice	Ref	2	Ref	0.95kb	Ref	1_2	Rc	Ref	Alt	Ref	SH4	T	T7
GD_W20	GD_W20	#N/A	#N/A	V6	Ind	China	PRJNA295802	weedy rice	Ref	2	Ref	WT	Ref	Ref	Rc	Ref	Alt	Ref	SH4	T	T7
GD_W21	GD_W21	#N/A	#N/A	V6	Ind	China	PRJNA295802	weedy rice	Ref	2	Ref	WT	Ref	Ref	Rc	Ref	Alt	Ref	SH4	T	T7
GD_W22	GD_W22	#N/A	#N/A	V14	Ind	China	PRJNA295802	weedy rice	Ref	Ref	Ref	0.95kb	2	Ref	Rc	Ref	Alt	Ref	Ref	T	WT
GD_W23	GD_W23	#N/A	#N/A	V6	Ind	China	PRJNA295802	weedy rice	Ref	2	Ref	0.95kb	Ref	Ref	Rc	Ref	Alt	Ref	Ref	T	T7
GD_W24	GD_W24	#N/A	#N/A	V6	Ind	China	PRJNA295802	weedy rice	Ref	2	Ref	WT	Ref	Ref	Rc	Ref	Alt	Ref	SH4	T	T7
GD_W25	GD_W25	#N/A	#N/A	V6	Ind	China	PRJNA295802	weedy rice	Ref	2	Ref	0.95kb	Ref	Ref	Rc	Ref	Alt	Ref	SH4	T	T7
GD_W26	GD_W26	#N/A	#N/A	V6	Ind	China	PRJNA295802	weedy rice	Ref	Ref	Ref	WT	Ref	Ref	Rc	Ref	Alt	Ref	SH4	T	T7
GD_W27	GD_W27	#N/A	#N/A	V6	Ind	China	PRJNA295802	weedy rice	Ref	2	Ref	0.95kb	Ref	Ref	Rc	Ref	Alt	Ref	SH4	T	T7
GD_W28	GD_W28	#N/A	#N/A	V6	Ind	China	PRJNA295802	weedy rice	Ref	2	Ref	0.95kb	Ref	1_2	Rc	Ref	Alt	Ref	SH4	T	T7
GD_W29	GD_W29	#N/A	#N/A	V6	Ind	China	PRJNA295802	weedy rice	Ref	2	Ref	0.95kb	Ref	1_2	Rc	Ref	Alt	Ref	SH4	T	T7
IRIS-11929	GILINGAN MARANGRAS	9.44611	118.393	V10	Jap	Philippines	PRJNA795890	T	Ref	2	Ref	WT	Ref	Ref	del	Ref	Alt	Ref	Ref	A	T13
3K175	GINATOS	10.7183	122.549	V10	Jap	Philippines	PRJNA795890	T	2	2	Ref	1.2kb	Ref	Ref	del	Ref	Alt	Ref	Ref	T	T13
3K039	GLAM	18.7439	99.7231	V12	Ind	Thailand	PRJNA795890	T	Ref	Ref	Ref	0.95kb	Ref	Ref	del	glutinous	Alt	Ref	Ref	T	WT
IRIS-10985	GOBOL SAIL	23.6117	90.3397	V8	Ind	Bangladesh	PRJNA795890	T	Ref	Ref	Ref	WT	Ref	1_2	del	Ref	Alt	Ref	Ref	T	WT
IRIS-9929	GOBYERNO	17.6972	121.406	V10	Jap	Philippines	PRJNA795890	T	Ref	2	Ref	1.2kb	Ref	Ref	del	Ref	Alt	Ref	Ref	T	T13
IRIS-11203	GOCHIAGARI	25.9	89.0333	V8	Ind	Bangladesh	PRJNA795890	T	Ref	Ref	Ref	WT	Ref	Ref	del	Ref	Alt	Ref	Ref	T	WT
IRIS-10722	GODAWEL	6.7	80.3833	V10	Jap	Sri Lanka	PRJNA795890	T	2	2	Ref	large	Ref	Ref	Rc	Ref	Alt	Ref	Ref	T	T13
IRIS-7885	GOGO	-8.455	115.072	V10	Jap	Indonesia	PRJNA795890	T	2	Ref	Ref	large	Ref	Ref	del	het	Alt	Ref	Ref	T	T13
IRIS-10771	GOGO RAJAPAN	-8.87194	121.811	V11	Jap	Indonesia	PRJNA795890	T	Ref	3	Ref	0.95kb	Ref	1_2	het	Ref	Alt	Ref	Ref	T	WT
IRIS-9851	GOGOWIERIE	#N/A	#N/A	V10	Jap	Surinam	PRJNA795890	T	Ref	3	Ref	WT	Ref	1_2	del	Ref	Alt	Ref	Ref	T	T13
IRIS-9139	GOJOL GORIA	23.6117	90.3397	V8	Ind	Bangladesh	PRJNA795890	T	Ref	Ref	Ref	WT	Ref	1_2	del	Ref	Alt	Ref	Ref	T	WT
3K068	GOJOT	-6.96889	110.124	V11	Ind	Indonesia	PRJNA795890	T	2	Ref	Ref	0.95kb	2	1_2	del	Ref	Alt	Ref	Ref	T	T13
IRIS-11527	GOLO	#N/A	#N/A	V10	Jap	Cote dIvoire	PRJNA795890	T	Ref	3	Ref	1.2kb	Ref	Ref	del	Ref	Alt	Ref	Ref	T	T13
IRIS-11557	GORIA	23.6117	90.3397	V9	Aus	Bangladesh	PRJNA795890	T	Ref	2	Ref	WT	Ref	1_2	Rc	Ref	Alt	qSH3	Ref	T	T13
IRIS-11965	GUANG XUAN LIU HAO	23.7489	108.302	V13	Ind	China	PRJNA795890	T	Ref	2	Ref	WT	2	1_2	del	Ref	Alt	Ref	Ref	T	WT
IRIS-9409	GUMPANGAR	#N/A	#N/A	V11	Ind	Malaysia	PRJNA795890	T	Ref	3	Ref	WT	Ref	Ref	del	Ref	Alt	Ref	Ref	T	WT
IRIS-10196	GUO DI HEI	#N/A	#N/A	V10	Jap	China	PRJNA795890	0	Ref	3	Ref	WT	Ref	Ref	del	Ref	Alt	Ref	Ref	A	T13
IRIS-11120	GURULEY	26.9331	89.95	V8	Ind	Bhutan	PRJNA795890	T	Ref	Ref	Ref	0.95kb	Ref	1_2	del	Ref	Alt	Ref	Ref	T	WT
UL048	Gurusu	#N/A	#N/A	V4	Jap	Taiwan	PRJNA485658	indigenous	2	3	Ref	WT	Ref	Ref	del	Ref	Alt	Ref	Ref	A	WT
IRIS-12003	GYEONGSAN 1	#N/A	#N/A	V2	Jap	South Korea	PRJNA795890	P	Ref	Ref	Ref	1.2kb	Ref	Ref	Rc	Ref	Alt	Ref	Ref	A	WT
UL052	HabunNo1	#N/A	#N/A	V6	Ind	Taiwan	PRJNA485658	indigenous	2	Ref	Ref	0.95kb	Ref	1_2	del	Ref	Alt	Ref	Ref	T	WT
IRIS-12342	Hai na	20.2289	101.56	V4	Jap	Laos	PRJNA795890	T	2	3	2	1.2kb	Ref	Ref	del	glutinous	Alt	Ref	Ref	T	WT
UL038	Haifugoya	#N/A	#N/A	V2	Jap	Taiwan	PRJNA485658	indigenous	2	Ref	Ref	1.2kb	Ref	Ref	del	Ref	Alt	Ref	Ref	A	WT
3K161	HAJI HARUN 38	2.03028	109.642	V12	Ind	Malaysia	PRJNA795890	T	Ref	3	Ref	WT	Ref	1_2	del	Ref	Alt	Ref	Ref	T	WT
IRIS-10986	HALDI JAON	23.6117	90.3397	V8	Ind	Bangladesh	PRJNA795890	T	Ref	Ref	Ref	0.95kb	Ref	1_2	del	Ref	Alt	Ref	Ref	T	WT
IRIS-10721	HALSUDU HEENATI	8.31667	80.4167	V8	Ind	Sri Lanka	PRJNA795890	T	2	Ref	Ref	0.95kb	Ref	Ref	del	Ref	Alt	Ref	Ref	T	WT
IRIS-11015	HANPA	23.6117	90.3397	V9	Aus	Bangladesh	PRJNA795890	T	Ref	2	Ref	WT	Ref	1_2	Rc	Ref	Alt	qSH3	Ref	C	T13
LR191	Han-Tai-Chu	#N/A	#N/A	V6	Ind	Taiwan	PRJNA485658	Ming ching	Ref	Ref	Ref	0.95kb	Ref	1_2	del	Ref	Alt	Ref	Ref	T	WT
LR190	Han-Yeh-Ko-Tzu	#N/A	#N/A	V6	Ind	Taiwan	PRJNA485658	Ming ching	Ref	Ref	Ref	0.95kb	Ref	1_2	del	Ref	Alt	Ref	Ref	T	T7
CX367	Haogelao	#N/A	#N/A	V10	Jap	China	PRJNA795890	P	Ref	3	Ref	WT	Ref	Ref	het	Ref	Alt	het	Ref	het	T13
IRIS-10773	HAWARA DJEDAH	-1.22333	100.448	V7	Jap	Indonesia	PRJNA795890	T	Ref	3	Ref	large	Ref	Ref	Rc	Ref	Alt	Ref	Ref	A	T13
IRIS-8674	HAWM KRUA	17.0056	99.8264	V12	Ind	Thailand	PRJNA795890	T	Ref	3	Ref	WT	Ref	1_2	del	Ref	Alt	Ref	Ref	T	WT
IRIS-8722	HAWM TOONG	16.4325	103.507	V12	Ind	Thailand	PRJNA795890	T	Ref	3	Ref	0.95kb	Ref	Ref	del	glutinous	Alt	Ref	Ref	T	WT
LR198	He No	#N/A	#N/A	V13	Ind	Taiwan	PRJNA485658	Ming ching	Ref	3	Ref	WT	2	Ref	del	glutinous	Alt	Ref	Ref	T	T3
LR128	Hei Mi Chan	#N/A	#N/A	V13	Ind	China	PRJNA485658	P	Ref	3	Ref	0.95kb	Ref	Ref	del	Ref	Alt	Ref	Ref	T	WT
LR184	HeiChan	#N/A	#N/A	V6	Ind	Taiwan	PRJNA623980	Ming ching	Ref	2	Ref	0.95kb	Ref	1_2	Rc	Ref	Alt	Ref	Ref	T	WT
IRIS-11741	HERATH BANDA	6.61639	80.1164	V8	Ind	Sri Lanka	PRJNA795890	T	Ref	Ref	Ref	WT	Ref	Ref	Rc	Ref	Alt	Ref	Ref	T	WT
IRIS-9974	HEUKSANJO	35.8592	127.336	V2	Jap	South Korea	PRJNA795890	T	Ref	Ref	Ref	1.2kb	Ref	Ref	del	Ref	Alt	Ref	Ref	A	WT
IRIS-11112	HIJOL DIGA	23.6117	90.3397	V9	Aus	Bangladesh	PRJNA795890	T	Ref	2	Ref	WT	Ref	Ref	Rc	Ref	Alt	qSH3	Ref	C	WT
IRIS-10080	HIRAKAWA OKUTE	34.7839	134.375	V5	Jap	Japan	PRJNA795890	T	2	Ref	Ref	1.2kb	Ref	Ref	del	het	Alt	Ref	Ref	T	WT
IRIS-12128	Hma gneng	16.3831	105.258	V12	Ind	Laos	PRJNA795890	T	2	3	Ref	WT	Ref	1_2	del	Ref	Alt	Ref	Ref	T	WT
IRIS-10020	HODARAWALA	6.57472	80.1339	V9	Aus	Sri Lanka	PRJNA795890	T	Ref	Ref	Ref	WT	Ref	1_2	Rc	Ref	Alt	Ref	Ref	C	WT
IRIS-10824	HOING CANTEL	-2.69056	119.026	V11	Ind	Indonesia	PRJNA795890	T	2	3	Ref	WT	Ref	1_2	del	Ref	Alt	Ref	Ref	T	T13
IRIS-9617	HOLDI GIRA	23.6117	90.3397	V12	Ind	Bangladesh	PRJNA795890	T	Ref	2	Ref	0.95kb	Ref	1_2	Rc	Ref	Alt	Ref	Ref	T	WT
IRIS-8721	HOLOI BASH	22.3667	90.35	V9	Aus	Bangladesh	PRJNA795890	T	Ref	2	Ref	WT	Ref	Ref	Rc	Ref	Alt	qSH3	Ref	C	T13
IRIS-11909	HONG MI JIU GONG JI	#N/A	#N/A	V13	Ind	China	PRJNA795890	0	Ref	2	Ref	0.95kb	2	Ref	Rc	Ref	Alt	Ref	Ref	T	WT
IRIS-11575	HONG PI NUO	#N/A	#N/A	V2	Jap	China	PRJNA795890	0	Ref	Ref	Ref	1.2kb	Ref	Ref	Rc	Ref	Alt	Ref	Ref	A	WT
CX383	Hongza	#N/A	#N/A	V2	Jap	China	PRJNA795890	P	Ref	Ref	Ref	1.2kb	Ref	Ref	del	Ref	het	Ref	Ref	A	T19
UL022	Hopotsutaiyaru	#N/A	#N/A	V6	Ind	Taiwan	PRJNA485658	indigenous	Ref	Ref	Ref	0.95kb	Ref	1_2	del	glutinous	Ref	Ref	Ref	T	WT
UL240	HSIANG TSENF TAO	#N/A	#N/A	V5	Jap	Taiwan	PRJNA485658	Ming ching	Ref	Ref	Ref	1.2kb	Ref	Ref	del	glutinous	Alt	Ref	Ref	T	WT
HC56	Hsinchu 56	23.71	120.94	V2	Jap	Taiwan	PRJNA485658	Modern variety	Ref	Ref	Ref	1.2kb	Ref	Ref	del	Ref	Alt	Ref	Ref	A	T19
LR122	HSINCHU AI CHIO CHIENG	23.71	120.94	V13	Ind	Taiwan	PRJNA485658	Ming ching	Ref	2	Ref	0.95kb	Ref	1_2	del	Ref	Alt	Ref	Ref	T	T3
LR185	HsinChuLiuChan	#N/A	#N/A	V13	Ind	Taiwan	PRJNA623980	Ming ching	Ref	Ref	Ref	0.95kb	Ref	Ref	del	Ref	Alt	Ref	Ref	T	T7
LR194	Hsin-Chung	#N/A	#N/A	V13	Ind	Taiwan	PRJNA485658	Ming ching	Ref	Ref	Ref	0.95kb	2	1_2	del	Ref	Alt	Ref	Ref	T	T7
UL140	Hsing-mei1	23.91	120.81	V1	Jap	Taiwan	PRJNA485658	indigenous	Ref	3	3	1.2kb	Ref	Ref	Rc	glutinous	Alt	Ref	Ref	A	WT
UL141	Hsing-mei2	23.91	120.81	V1	Jap	Taiwan	PRJNA485658	indigenous	Ref	3	3	1.2kb	Ref	Ref	Rc	glutinous	Alt	Ref	Ref	A	WT
UL142	Hsing-mei5	23.91	120.81	V6	Ind	Taiwan	PRJNA485658	indigenous	2	3	Ref	0.95kb	Ref	1_2	Rc	Ref	Alt	Ref	Ref	T	WT
UL143	Hsing-mei9	23.91	120.81	V4	Jap	Taiwan	PRJNA485658	indigenous	Ref	3	Ref	WT	Ref	Ref	del	glutinous	Alt	Ref	Ref	A	WT
HNY34	Hsinnungyu 34	23.71	120.94	V2	Jap	Taiwan	PRJNA485658	breeding	Ref	Ref	Ref	1.2kb	Ref	Ref	del	Ref	Alt	Ref	Ref	A	T19
LR120	HSIN-TAO-YUAN-CHING-YU	24.99	121.16	V13	Ind	Taiwan	PRJNA485658	Ming ching	Ref	Ref	Ref	0.95kb	Ref	1_2	del	Ref	Alt	Ref	Ref	T	WT
IRIS-10224	HUA LI ZAO	#N/A	#N/A	V13	Ind	China	PRJNA795890	0	Ref	2	Ref	0.95kb	2	Ref	Rc	Ref	Alt	Ref	Ref	T	T13
UL118	Hualen123	23.93	121.56	V6	Ind	Taiwan	PRJNA485658	indigenous	Ref	3	Ref	WT	Ref	1_2	del	glutinous	Ref	Ref	Ref	T	T3
UL106	Hualen13	23.93	121.56	V1	Jap	Taiwan	PRJNA485658	indigenous	Ref	3	3	1.2kb	Ref	Ref	del	glutinous	Alt	Ref	Ref	A	WT
UL107	Hualen20	23.93	121.56	V1	Jap	Taiwan	PRJNA485658	indigenous	Ref	3	3	1.2kb	Ref	Ref	del	Ref	Alt	Ref	Ref	A	WT
UL108	Hualen27	23.93	121.56	V1	Jap	Taiwan	PRJNA485658	indigenous	Ref	3	Ref	1.2kb	Ref	Ref	del	het	Alt	Ref	Ref	A	WT
UL119	Hualien124	23.93	121.56	V6	Ind	Taiwan	PRJNA485658	indigenous	Ref	3	Ref	0.95kb	Ref	1_2	del	glutinous	Alt	Ref	Ref	T	T7
UL120	Hualien125	23.93	121.56	V13	Ind	Taiwan	PRJNA485658	indigenous	Ref	2	Ref	WT	Ref	1_2	Rc	Ref	Alt	Ref	Ref	T	T7
UL121	Hualien126	23.93	121.56	V1	Jap	Taiwan	PRJNA485658	indigenous	Ref	3	Ref	1.2kb	Ref	Ref	Rc	glutinous	Alt	Ref	Ref	A	WT
UL220	Hualien129-2	23.93	121.56	V6	Ind	Taiwan	PRJNA485658	indigenous	Ref	3	Ref	0.95kb	Ref	1_2	del	glutinous	Alt	Ref	Ref	T	WT
UL202	Hualien133	23.93	121.56	V6	admix	Taiwan	PRJNA485658	indigenous	Ref	3	Ref	WT	Ref	Ref	Rc	het	Alt	Ref	het	T	WT
UL199	Hualien137	23.93	121.56	V1	Jap	Taiwan	PRJNA485658	indigenous	Ref	3	Ref	1.2kb	Ref	Ref	Rc	glutinous	Alt	Ref	Ref	T	WT
UL207	Hualien25	23.93	121.56	V1	Jap	Taiwan	PRJNA485658	indigenous	Ref	3	Ref	1.2kb	Ref	Ref	del	glutinous	Alt	Ref	Ref	A	WT
UL109	Hualien33	23.93	121.56	V1	Jap	Taiwan	PRJNA485658	indigenous	Ref	3	Ref	1.2kb	Ref	Ref	del	glutinous	Alt	Ref	Ref	A	WT
UL209	Hualien36	23.93	121.56	V1	Jap	Taiwan	PRJNA485658	indigenous	Ref	3	Ref	1.2kb	Ref	Ref	del	glutinous	Alt	Ref	Ref	A	WT
UL211	Hualien4	23.93	121.56	V1	Jap	Taiwan	PRJNA485658	indigenous	Ref	3	3	1.2kb	Ref	Ref	del	glutinous	Alt	Ref	Ref	A	WT
UL110	Hualien40	23.93	121.56	V13	Ind	Taiwan	PRJNA485658	indigenous	Ref	2	Ref	0.95kb	2	1_2	Rc	Ref	Alt	Ref	Ref	T	T3
UL218	Hualien41	23.93	121.56	V2	Jap	Taiwan	PRJNA485658	indigenous	Ref	Ref	Ref	1.2kb	Ref	Ref	Rc	Ref	Alt	Ref	Ref	A	WT
UL212	Hualien46	23.93	121.56	V1	Jap	Taiwan	PRJNA485658	indigenous	2	3	3	1.2kb	Ref	Ref	del	glutinous	Alt	Ref	Ref	A	WT
UL219	Hualien47	23.93	121.56	V1	Jap	Taiwan	PRJNA485658	indigenous	Ref	3	3	1.2kb	Ref	Ref	del	glutinous	Alt	Ref	Ref	A	WT
UL111	Hualien49	23.93	121.56	V1	Jap	Taiwan	PRJNA485658	indigenous	Ref	3	Ref	1.2kb	Ref	Ref	Rc	glutinous	Alt	Ref	Ref	T	WT
UL112	Hualien52	23.93	121.56	V1	Jap	Taiwan	PRJNA485658	indigenous	Ref	3	Ref	1.2kb	Ref	Ref	Rc	glutinous	Alt	Ref	Ref	T	WT
UL113	Hualien60	23.93	121.56	V1	Jap	Taiwan	PRJNA485658	indigenous	Ref	3	Ref	1.2kb	Ref	Ref	Rc	glutinous	Alt	Ref	Ref	A	WT
UL105	Hualien7	23.93	121.56	V1	admix	Taiwan	PRJNA485658	indigenous	Ref	3	Ref	1.2kb	Ref	Ref	del	glutinous	Alt	Ref	Ref	A	WT
UL114	Hualien71	23.93	121.56	V6	Ind	Taiwan	PRJNA485658	indigenous	Ref	3	Ref	0.95kb	Ref	1_2	Rc	Ref	Alt	Ref	Ref	T	WT
UL115	Hualien79	23.93	121.56	V6	Ind	Taiwan	PRJNA485658	indigenous	Ref	3	Ref	0.95kb	Ref	1_2	Rc	Ref	Alt	Ref	Ref	T	WT
UL116	Hualien81	23.93	121.56	V6	Ind	Taiwan	PRJNA485658	indigenous	Ref	3	Ref	0.95kb	Ref	1_2	Rc	Ref	Alt	Ref	Ref	T	WT
UL117	Hualien82	23.93	121.56	V1	Jap	Taiwan	PRJNA485658	indigenous	Ref	3	Ref	1.2kb	Ref	Ref	Rc	glutinous	Alt	Ref	Ref	A	WT
UL215	Hualien89	23.93	121.56	V4	Jap	Taiwan	PRJNA485658	indigenous	Ref	3	Ref	1.2kb	Ref	Ref	del	Ref	Alt	Ref	Ref	A	WT
LR174	Hua-Lou	#N/A	#N/A	V6	Ind	Taiwan	PRJNA485658	Ming ching	Ref	Ref	Ref	0.95kb	Ref	1_2	del	Ref	Alt	Ref	Ref	T	WT
CX88	Huanyangnian	#N/A	#N/A	V14	Ind	China	PRJNA795890	P	Ref	Ref	Ref	0.95kb	Ref	1_2	Rc	Ref	Alt	Ref	Ref	T	T7
IRIS-9886	HUK ZO	35.8592	127.336	V2	Jap	South Korea	PRJNA795890	T	Ref	Ref	Ref	1.2kb	Ref	Ref	del	Ref	Alt	Ref	Ref	A	WT
IRIS-9379	HWANGJO	35.8592	127.336	V2	Jap	South Korea	PRJNA795890	T	Ref	Ref	Ref	1.2kb	Ref	Ref	del	Ref	Alt	Ref	Ref	A	WT
3K016	I 814	28.3908	84.1225	V13	Ind	Nepal	PRJNA795890	0	Ref	Ref	Ref	0.95kb	2	1_2	del	Ref	Alt	Ref	Ref	T	WT
IRIS-11914	IB11	#N/A	#N/A	V8	Ind	Burundi	PRJNA795890	T	Ref	3	Ref	WT	Ref	Ref	del	Ref	Alt	qSH3	Ref	C	WT
IRIS-11494	IC25690	28.2389	94.0694	V4	Jap	India	PRJNA795890	T	2	Ref	Ref	1.2kb	Ref	Ref	del	Ref	Alt	Ref	Ref	T	WT
IRIS-8978	IE MATA CICEM	5.05	95.3667	V11	Ind	Indonesia	PRJNA795890	T	Ref	Ref	Ref	WT	Ref	1_2	del	Ref	Alt	Ref	Ref	T	WT
IRIS-10577	IFUGAO RICE	17.0636	120.965	V10	Jap	Philippines	PRJNA795890	T	2	3	Ref	large	Ref	Ref	Rc	Ref	Alt	Ref	Ref	A	T13
3K176	IKOGAN	9.44611	118.393	V10	Jap	Philippines	PRJNA795890	T	2	2	Ref	1.2kb	Ref	Ref	del	Ref	Alt	Ref	Ref	T	T13
LR011	IKungPao	#N/A	#N/A	V13	Ind	Taiwan	PRJNA485658	Ming ching	Ref	2	Ref	0.95kb	Ref	1_2	del	Ref	Alt	Ref	Ref	T	T3
UL104	INAGUaromaticgluteous	#N/A	#N/A	V1	Jap	Taiwan	PRJNA485658	indigenous	Ref	Ref	3	1.2kb	Ref	Ref	del	glutinous	Alt	Ref	Ref	A	WT
IRIS-10829	INAMBOG	9.44611	118.393	V10	Jap	Philippines	PRJNA795890	T	2	2	Ref	WT	Ref	Ref	del	Ref	Alt	Ref	Ref	T	T13
3K090	INANUPAN	16.5214	120.423	V8	Ind	Philippines	PRJNA795890	T	Ref	Ref	Ref	0.95kb	Ref	Ref	Rc	Ref	Alt	Ref	Ref	T	WT
3K221	INAPORAONAN	9.91667	118.717	V10	Jap	Philippines	PRJNA795890	T	2	2	Ref	WT	Ref	Ref	del	Ref	Alt	Ref	Ref	T	T13
IRIS-11395	INDO NO 13075	-7.49306	112.429	V11	Ind	Indonesia	PRJNA795890	T	2	Ref	Ref	WT	2	1_2	del	Ref	Alt	Ref	Ref	T	WT
IRIS-10844	INDO NO 7505	-2.69056	119.026	V11	Ind	Indonesia	PRJNA795890	I	Ref	Ref	Ref	0.95kb	2	1_2	del	Ref	Alt	Ref	Ref	T	T13
IRIS-9405	INGSA BELANAK	-8.455	115.072	V7	Jap	Indonesia	PRJNA795890	T	Ref	Ref	Ref	large	Ref	Ref	del	Ref	Alt	Ref	Ref	T	T13
3K120	INITLOG DALAG	14.25	120.75	V10	Jap	Philippines	PRJNA795890	T	Ref	5	Ref	1.2kb	Ref	Ref	del	Ref	Alt	Ref	Ref	T	T13
3K017	INPONG	16.3831	105.258	V12	Ind	Laos	PRJNA795890	T	Ref	2	Ref	0.95kb	Ref	Ref	del	glutinous	Alt	Ref	Ref	T	WT
3K018	IR 19058-107-1	#N/A	#N/A	V6	Ind	Philippines	PRJNA795890	I	Ref	Ref	Ref	WT	Ref	1_2	del	Ref	Alt	Ref	Ref	T	T7
3K019	IR 19661-364-1-2-3	#N/A	#N/A	V12	Ind	Philippines	PRJNA795890	I	Ref	3	Ref	WT	2	1_2	del	Ref	Alt	Ref	Ref	T	T7
3K003	IR 2307-247-2-2-3	#N/A	#N/A	V6	Ind	Philippines	PRJNA795890	I	Ref	3	Ref	WT	Ref	1_2	del	Ref	Alt	Ref	Ref	T	T7
3K009	IR 42	#N/A	#N/A	V8	Ind	Philippines	PRJNA795890	I	2	Ref	Ref	WT	Ref	1_2	del	Ref	Alt	Ref	Ref	T	T7
CX403	IR 64 A	#N/A	#N/A	V8	Ind	Philippines	PRJNA795890	I	Ref	3	Ref	WT	Ref	1_2	del	Ref	Alt	Ref	Ref	T	T13
CX230	IR 64-IL	#N/A	#N/A	V11	Ind	Philippines	PRJNA795890	I	Ref	3	Ref	WT	Ref	1_2	del	Ref	Alt	Ref	Ref	T	T13
IR24	IR24	#N/A	#N/A	V6	Ind	Philippines	PRJNA656900	0	Ref	3	Ref	WT	Ref	1_2	del	Ref	Alt	Ref	Ref	T	WT
IR64	IR64	#N/A	#N/A	V6	Ind	Philippines	PRJNA299530	0	Ref	3	Ref	WT	Ref	1_2	del	Ref	Alt	Ref	Ref	T	T13
IR8	IR8	#N/A	#N/A	V13	Ind	Philippines	PRJNA208420	0	Ref	3	Ref	0.95kb	Ref	1_2	del	Ref	Alt	Ref	Ref	T	T7
3K192	IREQUIN	12.3539	121.108	V2	Jap	Philippines	PRJNA795890	T	2	Ref	Ref	1.2kb	Ref	Ref	del	glutinous	Alt	Ref	Ref	A	WT
IRIS-9922	IRI 339	#N/A	#N/A	V8	Ind	South Korea	PRJNA795890	I	Ref	Ref	Ref	1.2kb	Ref	1_2	del	Ref	Alt	Ref	Ref	T	T7
IRIS-8410	JABOR SAIL	25.15	89.3833	V9	Aus	Bangladesh	PRJNA795890	T	2	2	Ref	WT	Ref	1_2	Rc	Ref	Alt	qSH3	Ref	C	T13
IRIS-10065	JAERAERYUKDO	35.8592	127.336	V5	Jap	South Korea	PRJNA795890	T	2	Ref	Ref	1.2kb	Ref	Ref	del	Ref	Alt	Ref	Ref	T	WT
IRIS-8252	JAGLI BORO	23.6117	90.3397	V9	Aus	Bangladesh	PRJNA795890	T	Ref	2	Ref	WT	Ref	Ref	het	Ref	Alt	qSH3	Ref	C	T13
IRIS-9449	JAMBALI	28.3	67.2167	V9	Aus	Pakistan	PRJNA795890	T	Ref	Ref	Ref	WT	Ref	Ref	Rc	Ref	Alt	het	Ref	T	T13
IRIS-8815	JANA	27.45	89.4667	V4	Jap	Bhutan	PRJNA795890	T	Ref	Ref	Ref	WT	Ref	Ref	Rc	Ref	Alt	Ref	Ref	A	WT
IRIS-9251	JANDA LAOR	0.86361	109.894	V11	Ind	Indonesia	PRJNA795890	T	Ref	Ref	Ref	0.95kb	Ref	1_2	del	Ref	Alt	Ref	Ref	T	WT
IRIS-11327	JAO HAWN MAE JAN	16	103	V12	Ind	Thailand	PRJNA795890	T	2	3	Ref	WT	Ref	1_2	del	Ref	Alt	Ref	Ref	T	WT
IRIS-11530	JAO KHAO	13.0394	101.492	V12	Ind	Thailand	PRJNA795890	T	2	3	Ref	WT	Ref	Ref	del	Ref	Alt	Ref	Ref	T	WT
IRIS-8679	JAO LEUANG	13.5289	99.8142	V12	Ind	Thailand	PRJNA795890	T	Ref	3	Ref	WT	Ref	1_2	del	Ref	Alt	Ref	Ref	T	WT
IRIS-10702	JAROM EMAS	2.03028	109.642	V11	Ind	Malaysia	PRJNA795890	T	2	3	Ref	large	Ref	1_2	del	Ref	Alt	Ref	Ref	T	WT
IRIS-11322	JASURE AUS	24	89.3331	V9	Aus	Bangladesh	PRJNA795890	T	Ref	2	Ref	0.95kb	2	Ref	Rc	Ref	Alt	qSH3	Ref	C	T13
IRIS-10951	JENDA ABANG	1.83278	98.7569	V11	Ind	Indonesia	PRJNA795890	T	2	Ref	Ref	WT	2	1_2	del	Ref	Alt	Ref	Ref	T	WT
IRIS-10067	JEONBUKGUNGWEONNA	35.8592	127.336	V5	Jap	South Korea	PRJNA795890	T	Ref	Ref	Ref	1.2kb	Ref	Ref	del	glutinous	Alt	Ref	Ref	T	WT
IRIS-9887	JEUK DO	35.8592	127.336	V2	Jap	South Korea	PRJNA795890	T	Ref	Ref	Ref	1.2kb	Ref	Ref	del	Ref	Alt	Ref	Ref	A	WT
IRIS-9262	JHODI BIRUN	23.6117	90.3397	V12	Ind	Bangladesh	PRJNA795890	T	Ref	2	Ref	WT	2	1_2	del	Ref	Alt	Ref	Ref	T	WT
IRIS-11027	JHONA 101	30.3958	69.3625	V9	Aus	Pakistan	PRJNA795890	T	Ref	2	Ref	WT	Ref	Ref	Rc	Ref	Alt	qSH3	Ref	C	T13
IRIS-11323	JHORA	22.7	90.3667	V9	Aus	Bangladesh	PRJNA795890	T	Ref	2	Ref	WT	Ref	1_2	Rc	Ref	Alt	qSH3	Ref	C	T13
IRIS-10981	JHUL DIGA	23.6117	90.3397	V9	Aus	Bangladesh	PRJNA795890	T	Ref	2	Ref	WT	Ref	Ref	Rc	Ref	Alt	qSH3	Ref	T	WT
IRIS-11802	JIE CAO ZHAN	#N/A	#N/A	V13	Ind	China	PRJNA795890	0	Ref	Ref	Ref	WT	2	1_2	Rc	Ref	Alt	Ref	Ref	T	T7
CX329	Jinchuanyihao	#N/A	#N/A	V2	Jap	China	PRJNA795890	P	2	Ref	Ref	1.2kb	Ref	Ref	del	Ref	Ref	Ref	Ref	A	WT
CX389	Jinyuan 85	#N/A	#N/A	V2	Jap	China	PRJNA795890	P	Ref	Ref	Ref	0.95kb	Ref	Ref	del	Ref	Ref	Ref	Ref	A	WT
IRIS-9698	JO SANG DAE YA	40.3017	127.432	V2	Jap	North Korea	PRJNA795890	T	Ref	Ref	Ref	1.2kb	Ref	Ref	del	Ref	Ref	Ref	Ref	A	T19
IRIS-8683	JOTA BITCHI 1	23.5	91.9167	V8	Ind	Bangladesh	PRJNA795890	T	2	Ref	Ref	WT	Ref	1_2	del	Ref	Alt	Ref	Ref	T	WT
JS_W01	JS_W01	#N/A	#N/A	V14	Ind	China	PRJNA295802	weedy rice	Ref	Ref	Ref	0.95kb	Ref	Ref	Rc	Ref	Alt	Ref	Ref	T	WT
JS_W02	JS_W02	#N/A	#N/A	V2	Jap	China	PRJNA295802	weedy rice	Ref	Ref	Ref	1.2kb	Ref	Ref	Rc	Ref	Alt	Ref	Ref	A	WT
JS_W03	JS_W03	#N/A	#N/A	V6	Ind	China	PRJNA295802	weedy rice	Ref	2	Ref	0.95kb	2	Ref	Rc	Ref	Alt	Ref	Ref	het	WT
JS_W04	JS_W04	#N/A	#N/A	V14	Ind	China	PRJNA295802	weedy rice	Ref	Ref	Ref	0.95kb	2	Ref	Rc	Ref	Alt	Ref	Ref	T	WT
JS_W05	JS_W05	#N/A	#N/A	V13	Ind	China	PRJNA295802	weedy rice	Ref	2	Ref	WT	Ref	1_2	Rc	Ref	Alt	Ref	Ref	T	WT
JS_W06	JS_W06	#N/A	#N/A	V14	Ind	China	PRJNA295802	weedy rice	Ref	Ref	Ref	0.95kb	2	Ref	Rc	Ref	Alt	Ref	Ref	T	WT
JS_W07	JS_W07	#N/A	#N/A	V14	Ind	China	PRJNA295802	weedy rice	Ref	Ref	Ref	0.95kb	2	Ref	Rc	Ref	Alt	Ref	Ref	T	WT
JS_W08	JS_W08	#N/A	#N/A	V14	Ind	China	PRJNA295802	weedy rice	Ref	2	Ref	WT	2	1_2	Rc	Ref	Alt	Ref	Ref	T	WT
JS_W09	JS_W09	#N/A	#N/A	V14	Ind	China	PRJNA295802	weedy rice	Ref	Ref	Ref	0.95kb	2	Ref	Rc	Ref	Alt	Ref	Ref	T	WT
JS_W10	JS_W10	#N/A	#N/A	V14	Ind	China	PRJNA295802	weedy rice	Ref	Ref	Ref	0.95kb	2	Ref	Rc	Ref	Alt	Ref	Ref	T	WT
JS_W11	JS_W11	#N/A	#N/A	V14	Ind	China	PRJNA295802	weedy rice	Ref	Ref	Ref	0.95kb	2	Ref	Rc	Ref	Alt	Ref	Ref	T	WT
JS_W12	JS_W12	#N/A	#N/A	V14	Ind	China	PRJNA295802	weedy rice	Ref	Ref	Ref	0.95kb	2	Ref	Rc	Ref	Alt	Ref	Ref	T	WT
JS_W14	JS_W14	#N/A	#N/A	V14	Ind	China	PRJNA295802	weedy rice	Ref	Ref	Ref	0.95kb	2	Ref	Rc	Ref	Alt	Ref	Ref	T	WT
JS_W16	JS_W16	#N/A	#N/A	V14	Ind	China	PRJNA295802	weedy rice	Ref	Ref	Ref	0.95kb	2	Ref	Rc	Ref	Alt	Ref	Ref	T	WT
JS_W17	JS_W17	#N/A	#N/A	V14	Ind	China	PRJNA295802	weedy rice	Ref	Ref	Ref	WT	2	1_2	Rc	Ref	Alt	Ref	Ref	T	WT
JS_W18	JS_W18	#N/A	#N/A	V14	Ind	China	PRJNA295802	weedy rice	Ref	Ref	Ref	0.95kb	2	Ref	Rc	Ref	Alt	Ref	Ref	T	WT
JS_W19	JS_W19	#N/A	#N/A	V14	Ind	China	PRJNA295802	weedy rice	Ref	Ref	Ref	0.95kb	2	Ref	Rc	Ref	Alt	Ref	Ref	T	WT
JS_W20	JS_W20	#N/A	#N/A	V14	Ind	China	PRJNA295802	weedy rice	Ref	Ref	Ref	0.95kb	Ref	Ref	Rc	Ref	Alt	Ref	Ref	T	WT
JS_W23	JS_W23	#N/A	#N/A	V14	Ind	China	PRJNA295802	weedy rice	Ref	Ref	Ref	0.95kb	2	Ref	Rc	Ref	Alt	Ref	Ref	T	WT
JS_W26	JS_W26	#N/A	#N/A	V14	Ind	China	PRJNA295802	weedy rice	Ref	Ref	Ref	0.95kb	2	Ref	Rc	Ref	Alt	Ref	Ref	T	WT
JS_W29	JS_W29	#N/A	#N/A	V13	Ind	China	PRJNA295802	weedy rice	Ref	2	Ref	WT	2	Ref	Rc	Ref	Alt	Ref	Ref	T	WT
JS_W30	JS_W30	#N/A	#N/A	V14	Ind	China	PRJNA295802	weedy rice	Ref	Ref	Ref	0.95kb	2	Ref	Rc	Ref	Alt	Ref	Ref	T	WT
JS_W35	JS_W35	#N/A	#N/A	V14	Ind	China	PRJNA295802	weedy rice	Ref	Ref	Ref	0.95kb	Ref	Ref	Rc	Ref	Alt	Ref	Ref	T	WT
JS_W36	JS_W36	#N/A	#N/A	V14	Ind	China	PRJNA295802	weedy rice	Ref	Ref	Ref	0.95kb	2	Ref	Rc	Ref	Alt	Ref	Ref	T	WT
JS_W37	JS_W37	#N/A	#N/A	V13	Ind	China	PRJNA295802	weedy rice	Ref	2	Ref	0.95kb	2	1_2	Rc	Ref	Alt	Ref	Ref	T	WT
JS_W38	JS_W38	#N/A	#N/A	V14	Ind	China	PRJNA295802	weedy rice	Ref	Ref	Ref	0.95kb	2	Ref	Rc	Ref	Alt	Ref	Ref	T	WT
JS_W39	JS_W39	#N/A	#N/A	V13	Ind	China	PRJNA295802	weedy rice	Ref	2	Ref	WT	2	1_2	Rc	Ref	Alt	Ref	Ref	T	WT
JS_W40	JS_W40	#N/A	#N/A	V13	Ind	China	PRJNA295802	weedy rice	Ref	Ref	Ref	0.95kb	Ref	1_2	del	Ref	Alt	Ref	Ref	T	WT
JS_W42	JS_W42	#N/A	#N/A	V13	Ind	China	PRJNA295802	weedy rice	Ref	Ref	Ref	WT	Ref	1_2	Rc	Ref	Alt	Ref	Ref	T	WT
JS_W43	JS_W43	#N/A	#N/A	V13	Ind	China	PRJNA295802	weedy rice	Ref	2	Ref	WT	Ref	1_2	Rc	Ref	Alt	Ref	Ref	T	WT
JS_W49	JS_W49	#N/A	#N/A	V14	Ind	China	PRJNA295802	weedy rice	Ref	Ref	Ref	0.95kb	2	Ref	Rc	Ref	Alt	Ref	Ref	T	WT
JS_W50	JS_W50	#N/A	#N/A	V14	Ind	China	PRJNA295802	weedy rice	Ref	Ref	Ref	0.95kb	2	Ref	Rc	Ref	Alt	Ref	Ref	T	WT
JS_W51	JS_W51	#N/A	#N/A	V13	Ind	China	PRJNA295802	weedy rice	Ref	2	Ref	0.95kb	Ref	Ref	Rc	Ref	Alt	Ref	Ref	T	WT
JS_W52	JS_W52	#N/A	#N/A	V14	Ind	China	PRJNA295802	weedy rice	Ref	Ref	Ref	WT	2	Ref	Rc	Ref	Alt	Ref	Ref	T	WT
JS_W53	JS_W53	#N/A	#N/A	V14	Ind	China	PRJNA295802	weedy rice	Ref	Ref	Ref	0.95kb	2	Ref	Rc	Ref	Alt	Ref	Ref	T	WT
JS_W54	JS_W54	#N/A	#N/A	V14	Ind	China	PRJNA295802	weedy rice	Ref	Ref	Ref	WT	Ref	Ref	Rc	Ref	Alt	Ref	Ref	T	WT
JS_W55	JS_W55	#N/A	#N/A	V14	Ind	China	PRJNA295802	weedy rice	Ref	2	Ref	WT	2	1_2	Rc	Ref	Alt	Ref	Ref	T	WT
JS_W56	JS_W56	#N/A	#N/A	V13	Ind	China	PRJNA295802	weedy rice	Ref	Ref	Ref	WT	Ref	Ref	Rc	Ref	Alt	Ref	Ref	T	WT
JS_W58	JS_W58	#N/A	#N/A	V14	Ind	China	PRJNA295802	weedy rice	Ref	Ref	Ref	0.95kb	2	Ref	Rc	Ref	Alt	Ref	Ref	T	WT
IRIS-11505	K 1074	21.1278	82.8006	V8	Ind	India	PRJNA795890	T	Ref	2	Ref	0.95kb	Ref	Ref	het	Ref	Alt	Ref	Ref	T	WT
IRIS-10776	KABADOKA	-8.87194	121.811	V10	Jap	Indonesia	PRJNA795890	T	Ref	2	Ref	1.2kb	Ref	Ref	del	Ref	Alt	Ref	Ref	T	T13
UL041	Kabofu	#N/A	#N/A	V2	Jap	Taiwan	PRJNA485658	indigenous	Ref	Ref	Ref	large	Ref	Ref	del	Ref	Alt	Ref	Ref	A	T19
UL046	Kabotsumame	#N/A	#N/A	V1	Jap	Taiwan	PRJNA485658	indigenous	2	3	Ref	1.2kb	Ref	Ref	del	Ref	Alt	Ref	Ref	A	T19
IRIS-11016	KACHILON	23.6117	90.3397	V9	Aus	Bangladesh	PRJNA795890	T	Ref	2	Ref	WT	2	1_2	Rc	Ref	Alt	qSH3	Ref	C	T13
IRIS-9208	KACIK TARAM	-1.22333	100.448	V11	Ind	Indonesia	PRJNA795890	T	Ref	Ref	Ref	WT	Ref	1_2	del	Ref	Alt	Ref	Ref	T	WT
IRIS-11211	KADAMSAIL	24.6592	88.6753	V8	Ind	Bangladesh	PRJNA795890	T	Ref	3	Ref	WT	Ref	1_2	Rc	Ref	Alt	Ref	Ref	T	WT
IRIS-11959	KAGIOS PUTI	12.02	123.709	V12	Ind	Philippines	PRJNA795890	T	Ref	Ref	Ref	0.95kb	Ref	1_2	del	Ref	Alt	Ref	Ref	T	WT
3K125	KAHATAWEE	6.58306	79.9667	V8	Ind	Sri Lanka	PRJNA795890	T	Ref	Ref	Ref	0.95kb	Ref	Ref	Rc	Ref	Alt	Ref	Ref	T	WT
UL090	Kahorui	#N/A	#N/A	V4	Jap	Taiwan	PRJNA485658	indigenous	Ref	3	3	1.2kb	Ref	Ref	Rc	glutinous	Alt	Ref	Ref	A	WT
UL062	Kaisentetsuchitsu	#N/A	#N/A	V6	Ind	Taiwan	PRJNA485658	indigenous	Ref	Ref	Ref	0.95kb	Ref	1_2	del	glutinous	Alt	Ref	Ref	T	WT
IRIS-11113	KAL SHULI	23.6117	90.3397	V8	Ind	Bangladesh	PRJNA795890	T	Ref	2	Ref	WT	Ref	1_2	Rc	Ref	Alt	Ref	Ref	T	WT
3K162	KALA DIGHA	23.6117	90.3397	V8	Ind	Bangladesh	PRJNA795890	T	Ref	2	Ref	0.95kb	Ref	Ref	Rc	Ref	Alt	Ref	Ref	T	WT
IRIS-11115	KALA MUNA	23.6117	90.3397	V8	Ind	Bangladesh	PRJNA795890	T	Ref	2	Ref	0.95kb	Ref	Ref	Rc	Ref	Alt	Ref	Ref	T	WT
3K006	KALABAIL	22.25	92	V8	Ind	Bangladesh	PRJNA795890	T	Ref	Ref	Ref	0.95kb	Ref	Ref	Rc	Ref	Alt	Ref	Ref	T	WT
IRIS-11324	KALABOKRI	23.9208	90.7178	V9	Aus	Bangladesh	PRJNA795890	T	Ref	2	Ref	0.95kb	2	1_2	Rc	Ref	Alt	qSH3	Ref	C	T13
IRIS-9626	KALIA	23.6117	90.3397	V9	Aus	Bangladesh	PRJNA795890	T	Ref	Ref	Ref	WT	Ref	Ref	Rc	Ref	Alt	qSH3	Ref	C	T13
IRIS-11067	KALIBORO 600	23.6117	90.3397	V9	Aus	Bangladesh	PRJNA795890	P	Ref	Ref	Ref	WT	Ref	Ref	Rc	Ref	Alt	qSH3	Ref	C	T13
IRIS-11994	KALINDIG	12.3256	121.347	V10	Jap	Philippines	PRJNA795890	T	2	3	Ref	large	Ref	Ref	Rc	Ref	Alt	Ref	Ref	T	T13
IRIS-9218	KALO CHAKOL	22.5	91.8333	V8	Ind	Bangladesh	PRJNA795890	T	2	Ref	Ref	0.95kb	Ref	Ref	Rc	Ref	Alt	Ref	Ref	T	WT
3K041	KALOBONA	24.9103	88.7556	V8	Ind	Bangladesh	PRJNA795890	T	Ref	2	Ref	WT	Ref	1_2	Rc	Ref	Alt	Ref	Ref	T	WT
3K007	KALU ILANKALAYAN	7.93333	81	V8	Ind	Sri Lanka	PRJNA795890	T	Ref	2	Ref	0.95kb	Ref	Ref	Rc	Ref	Alt	Ref	Ref	T	WT
IRIS-9019	KAM PAI	18.5	98.3333	V12	Ind	Thailand	PRJNA795890	T	Ref	3	Ref	0.95kb	Ref	Ref	del	glutinous	Alt	Ref	Ref	T	WT
IRIS-10777	KAMAS	-6.75	107.5	V11	Ind	Indonesia	PRJNA795890	T	Ref	Ref	Ref	0.95kb	Ref	1_2	del	Ref	Alt	Ref	Ref	T	T7
IRIS-8857	KAMNAM	27.5	90.5	V4	Jap	Bhutan	PRJNA795890	T	Ref	Ref	Ref	WT	Ref	Ref	Rc	Ref	Alt	Ref	Ref	A	WT
IRIS-9669	KAMPAI PEUN MEUANG	18.8333	99.5	V12	Ind	Thailand	PRJNA795890	T	Ref	Ref	Ref	0.95kb	Ref	Ref	del	glutinous	Alt	Ref	Ref	T	WT
IRIS-11939	KAMPTI	#N/A	#N/A	V12	Ind	Burkina Faso	PRJNA795890	T	Ref	3	Ref	WT	Ref	1_2	del	Ref	Alt	Ref	Ref	T	WT
3K163	KAMRANGA	23.6117	90.3397	V8	Ind	Bangladesh	PRJNA795890	T	Ref	2	Ref	WT	Ref	1_2	het	Ref	Alt	Ref	Ref	T	WT
IRIS-10925	KAMULI	28.3908	84.1225	V9	Aus	Nepal	PRJNA795890	T	Ref	2	Ref	WT	Ref	Ref	Rc	Ref	Alt	qSH3	Ref	C	T13
IRIS-11830	KANDEKE YAIGAITI	#N/A	#N/A	V11	Ind	Gambia	PRJNA795890	T	2	Ref	Ref	WT	Ref	1_2	del	Ref	Alt	Ref	Ref	T	WT
IRIS-11888	KANGRI	28.1167	67.1667	V9	Aus	Pakistan	PRJNA795890	T	Ref	Ref	Ref	WT	Ref	Ref	Rc	Ref	Alt	qSH3	Ref	T	T13
LR188	kao-chueh-ko-tsu	#N/A	#N/A	V6	Ind	Taiwan	PRJNA485658	Ming ching	Ref	Ref	Ref	0.95kb	Ref	1_2	del	Ref	Alt	Ref	Ref	T	WT
KH139	Kaohsiung 139	22.67	120.67	V2	Jap	Taiwan	PRJNA485658	Modern variety	Ref	Ref	Ref	1.2kb	Ref	Ref	del	Ref	Alt	Ref	Ref	A	WT
KH143	Kaohsiung 143	22.67	120.67	V2	Jap	Taiwan	PRJNA485658	Modern variety	Ref	Ref	Ref	1.2kb	Ref	Ref	del	Ref	Alt	Ref	Ref	A	T19
KH145	Kaohsiung 145	22.67	120.67	V2	Jap	Taiwan	PRJNA485658	Modern variety	Ref	Ref	Ref	1.2kb	Ref	Ref	del	Ref	Alt	Ref	Ref	A	T19
KH146	Kaohsiung 146	22.67	120.67	V2	Jap	Taiwan	PRJNA485658	Modern variety	Ref	Ref	Ref	1.2kb	Ref	Ref	del	Ref	Alt	Ref	Ref	A	WT
KH21	Kaohsiung 21	22.67	120.67	V2	Jap	Taiwan	PRJNA485658	Modern variety	Ref	Ref	Ref	1.2kb	Ref	Ref	del	Ref	Alt	Ref	Ref	A	T19
IRIS-11458	KARAHANI	21.1278	82.8006	V9	Aus	India	PRJNA795890	T	Ref	2	Ref	WT	Ref	Ref	Rc	Ref	Alt	qSH3	Ref	C	WT
IRIS-11963	KARANGI	#N/A	#N/A	V9	Aus	India	PRJNA795890	I	Ref	2	Ref	WT	Ref	Ref	Rc	Ref	Alt	qSH3	Ref	C	WT
IRIS-11827	KARI GURMATIA	21.1278	82.8006	V8	Ind	India	PRJNA795890	T	Ref	Ref	Ref	WT	Ref	Ref	Rc	Ref	Alt	Ref	Ref	T	WT
IRIS-10545	KARIA	#N/A	#N/A	V9	Aus	0	PRJNA795890	T	2	2	Ref	WT	Ref	Ref	Rc	Ref	Alt	qSH3	Ref	T	WT
IRIS-10718	KARUTHA SEENATI	7.7	81.7	V9	Aus	Sri Lanka	PRJNA795890	T	Ref	Ref	Ref	WT	Ref	1_2	Rc	Ref	Alt	Ref	Ref	C	T13
3K223	KASIGNAYAN	12.3256	121.347	V10	Jap	Philippines	PRJNA795890	T	Ref	2	Ref	WT	Ref	Ref	Rc	Ref	Alt	Ref	Ref	T	T13
IRIS-10963	KATAKCHIKON	22.4167	92	V9	Aus	Bangladesh	PRJNA795890	T	Ref	2	Ref	WT	Ref	Ref	Rc	Ref	Alt	qSH3	Ref	C	T13
IRIS-11779	KATUMANI	#N/A	#N/A	V12	Ind	Tanzania	PRJNA795890	T	Ref	3	Ref	WT	Ref	1_2	del	Ref	Alt	Ref	Ref	T	WT
IRIS-8811	KATUNG	5.71667	115.95	V11	Ind	Malaysia	PRJNA795890	T	Ref	Ref	Ref	WT	2	1_2	del	Ref	Alt	Ref	Ref	T	WT
IRIS-12287	KAUK HNYINGWA	17	97	V12	Ind	Myanmar	PRJNA795890	T	Ref	3	Ref	WT	Ref	1_2	del	glutinous	Alt	Ref	Ref	T	WT
IRIS-12266	KAUK PAHLING	22.5972	96.8847	V4	Jap	Myanmar	PRJNA795890	T	Ref	3	2	WT	Ref	Ref	del	Ref	Alt	Ref	Ref	T	WT
IRIS-11999	KAUN TREI	12.3319	105.569	V12	Ind	Cambodia	PRJNA795890	T	Ref	3	Ref	WT	Ref	1_2	del	Ref	Alt	Ref	Ref	T	WT
IRIS-11117	KAYELI KUNING	1.08306	127.5	V10	Jap	Indonesia	PRJNA795890	T	Ref	2	Ref	WT	Ref	Ref	del	Ref	Alt	Ref	Ref	T	T13
IRIS-11205	KAZALSAIL	22.7	90.3667	V8	Ind	Bangladesh	PRJNA795890	T	Ref	2	Ref	0.95kb	Ref	Ref	Rc	Ref	Alt	Ref	Ref	T	WT
IRIS-8291	KEDOT	5.23333	95.2833	V11	Ind	Indonesia	PRJNA795890	T	Ref	Ref	Ref	WT	Ref	1_2	del	Ref	Alt	Ref	Ref	T	WT
IRIS-11319	KENCANA RANDAH	-2.45806	115.408	V11	Ind	Indonesia	PRJNA795890	T	Ref	Ref	Ref	WT	Ref	1_2	del	Ref	Alt	Ref	Ref	T	WT
IRIS-10778	KENTJANA MAHANG	-3.1225	115.905	V11	Ind	Indonesia	PRJNA795890	T	Ref	Ref	Ref	WT	2	1_2	del	Ref	Alt	Ref	Ref	T	WT
3K081	Keo lai	17.9628	102.614	V12	Ind	Laos	PRJNA795890	T	Ref	3	Ref	0.95kb	Ref	Ref	del	glutinous	Alt	Ref	Ref	T	WT
IRIS-10779	KERAN DUKUH	0.70417	101.934	V11	Ind	Indonesia	PRJNA795890	T	2	3	Ref	WT	Ref	1_2	del	Ref	Alt	Ref	Ref	T	T13
IRIS-8687	KEREN FENHO	#N/A	#N/A	V10	Jap	Guinea-Bissau	PRJNA795890	T	2	3	Ref	WT	Ref	Ref	del	Ref	Alt	Ref	Ref	T	T13
IRIS-11983	KERIBAREFOR	#N/A	#N/A	V8	Ind	Burkina Faso	PRJNA795890	T	Ref	Ref	Ref	WT	Ref	1_2	del	Ref	Alt	Ref	Ref	T	WT
IRIS-9329	KERITING TINGGI	#N/A	#N/A	V11	Ind	Indonesia	PRJNA795890	T	Ref	Ref	Ref	WT	Ref	1_2	del	Ref	Alt	Ref	Ref	T	WT
IRIS-9301	KETAN DONGGO	-8.48306	118.541	V7	Jap	Indonesia	PRJNA795890	T	Ref	3	Ref	0.95kb	Ref	Ref	del	glutinous	Alt	Ref	Ref	A	WT
IRIS-8831	KETAN KUNANG KUNENG	-1.16111	116.885	V11	Ind	Indonesia	PRJNA795890	T	Ref	Ref	Ref	0.95kb	2	1_2	del	glutinous	Alt	Ref	Ref	T	WT
IRIS-10780	KETAN LALER	-4.94778	104.852	V7	Jap	Indonesia	PRJNA795890	T	2	3	Ref	0.95kb	Ref	Ref	del	glutinous	Alt	Ref	Ref	A	T13
IRIS-11183	KETAN LEMBAYUNGAN	-7.49306	112.429	V10	Jap	Indonesia	PRJNA795890	T	Ref	3	Ref	0.95kb	Ref	Ref	del	glutinous	Alt	Ref	Ref	T	T13
3K103	KETAN MENAH	-0.4	116.966	V10	Jap	Indonesia	PRJNA795890	T	2	3	Ref	WT	Ref	Ref	del	glutinous	Alt	Ref	Ref	T	T13
IRIS-10781	KETAN MLANTING	-7.49306	112.429	V7	Jap	Indonesia	PRJNA795890	T	Ref	3	Ref	large	Ref	Ref	del	glutinous	Alt	Ref	Ref	A	T13
IRIS-10841	KETAN NANGKA	-2.69056	119.026	V7	Jap	Indonesia	PRJNA795890	T	Ref	3	Ref	0.95kb	Ref	Ref	del	glutinous	Alt	Ref	Ref	A	WT
IRIS-10782	KETAN NARIS	-6.75	107.5	V11	Ind	Indonesia	PRJNA795890	T	2	Ref	Ref	0.95kb	Ref	1_2	del	glutinous	Alt	Ref	Ref	T	WT
IRIS-10783	KETAN OSOG	-6.75	107.5	V7	Jap	Indonesia	PRJNA795890	T	2	3	Ref	0.95kb	Ref	Ref	del	glutinous	Alt	Ref	Ref	T	T13
3K126	KETAN PAPAH AREN	-2.69056	119.026	V7	Jap	Indonesia	PRJNA795890	T	2	3	Ref	WT	Ref	Ref	del	glutinous	Alt	Ref	Ref	T	T13
3K127	KETAN PELERN	-2.69056	119.026	V7	Jap	Indonesia	PRJNA795890	T	Ref	3	Ref	WT	Ref	Ref	del	glutinous	Alt	Ref	Ref	T	T13
IRIS-10784	KETAN SAPI	-6.96889	110.124	V7	Jap	Indonesia	PRJNA795890	T	2	3	Ref	0.95kb	Ref	Ref	del	glutinous	Alt	Ref	Ref	A	T13
IRIS-9590	KETAN SERANG	-7.53333	110.6	V11	Ind	Indonesia	PRJNA795890	T	Ref	Ref	Ref	WT	Ref	1_2	del	glutinous	Alt	Ref	Ref	T	T7
IRIS-10785	KETAN SLAWI	-7.49306	112.429	V7	Jap	Indonesia	PRJNA795890	T	Ref	3	Ref	large	Ref	Ref	del	het	Alt	Ref	Ref	T	T13
IRIS-10786	KETAN URANG	-7	110.5	V11	Ind	Indonesia	PRJNA795890	T	Ref	Ref	Ref	WT	Ref	1_2	del	Ref	Alt	Ref	Ref	T	WT
IRIS-10679	Khai do	20.2775	100.417	V4	Jap	Laos	PRJNA795890	T	Ref	3	2	1.2kb	Ref	Ref	del	glutinous	Alt	Ref	Ref	T	WT
IRIS-11216	KHAMA 1183	23.6117	90.3397	V9	Aus	Bangladesh	PRJNA795890	P	Ref	2	Ref	large	Ref	Ref	Rc	Ref	Alt	qSH3	Ref	T	WT
3K088	Khan thai do	17.0233	104.933	V12	Ind	Laos	PRJNA795890	T	Ref	3	Ref	0.95kb	Ref	Ref	del	glutinous	Alt	Ref	Ref	T	WT
IRIS-12344	Khao	20.3386	102.006	V4	Jap	Laos	PRJNA795890	T	2	3	2	1.2kb	Ref	Ref	del	glutinous	Alt	Ref	Ref	T	WT
IRIS-11608	KHAO BAWNG	8.5375	99.7231	V11	Ind	Thailand	PRJNA795890	T	Ref	3	Ref	0.95kb	2	1_2	del	Ref	Alt	Ref	Ref	T	WT
IRIS-11680	KHAO BUN MI	14.9719	102.1	V12	Ind	Thailand	PRJNA795890	T	Ref	3	Ref	WT	Ref	1_2	del	Ref	Alt	Ref	Ref	T	WT
3K194	KHAO DAENG HAWM	13.0394	101.492	V4	Jap	Thailand	PRJNA795890	T	2	3	2	1.2kb	Ref	Ref	del	glutinous	Alt	Ref	Ref	T	WT
IRIS-11073	Khao dam	19.2642	103.359	V4	Jap	Laos	PRJNA795890	T	Ref	3	Ref	WT	Ref	Ref	del	Ref	Alt	Ref	Ref	T	WT
IRIS-8253	KHAO DAWK MALI 105	#N/A	#N/A	V12	Ind	Thailand	PRJNA795890	T	Ref	3	Ref	WT	Ref	1_2	del	Ref	Alt	Ref	Ref	T	WT
IRIS-11386	KHAO DAWK MALI TIA	13.0394	101.492	V12	Ind	Thailand	PRJNA795890	T	Ref	3	Ref	WT	Ref	1_2	del	Ref	Alt	Ref	Ref	T	WT
IRIS-8985	KHAO HAWM	#N/A	#N/A	V12	Ind	Thailand	PRJNA795890	T	Ref	Ref	Ref	0.95kb	Ref	1_2	del	Ref	Alt	Ref	Ref	T	WT
IRIS-9281	KHAO KAI	12.5	102.5	V12	Ind	Thailand	PRJNA795890	T	Ref	3	Ref	0.95kb	Ref	Ref	del	Ref	Alt	Ref	Ref	T	WT
IRIS-12242	Khao Khot	18.9533	102.807	V4	Jap	Laos	PRJNA795890	T	2	3	2	1.2kb	Ref	Ref	del	glutinous	Alt	Ref	Ref	T	WT
IRIS-11836	KHAO KO RAOH	14.2119	101.202	V12	Ind	Thailand	PRJNA795890	T	Ref	3	Ref	WT	Ref	Ref	del	Ref	Alt	Ref	Ref	T	WT
IRIS-9121	KHAO LEUANG RAI	14.4742	100.118	V8	Ind	Thailand	PRJNA795890	T	2	Ref	Ref	WT	Ref	1_2	del	Ref	Alt	Ref	Ref	T	WT
IRIS-12351	Khao louang	#N/A	#N/A	V4	Jap	Laos	PRJNA795890	T	2	3	2	1.2kb	Ref	Ref	del	glutinous	Alt	Ref	Ref	T	WT
IRIS-11074	KHAO MAK KHAM	17.9628	102.614	V12	Ind	Laos	PRJNA795890	T	2	2	Ref	0.95kb	Ref	Ref	del	Ref	Alt	Ref	Ref	T	WT
IRIS-11837	KHAO NAHNG PRUNG	13.5489	101.616	V12	Ind	Thailand	PRJNA795890	T	Ref	3	Ref	WT	Ref	1_2	del	Ref	Alt	Ref	Ref	T	WT
IRIS-11706	KHAO NOK-4	14.0206	100.524	V11	Ind	Thailand	PRJNA795890	T	Ref	Ref	Ref	0.95kb	Ref	1_2	del	Ref	Alt	Ref	Ref	T	WT
IRIS-11681	KHAO PAWM	16.4439	100.348	V12	Ind	Thailand	PRJNA795890	T	Ref	Ref	Ref	WT	2	1_2	del	Ref	Alt	Ref	Ref	T	WT
IRIS-8870	KHAO PLAH LAI NAK	13.2017	101.252	V12	Ind	Thailand	PRJNA795890	T	Ref	3	Ref	WT	Ref	1_2	del	Ref	Alt	Ref	Ref	T	WT
IRIS-8702	KHAO PRAHJIN	14.0478	101.373	V12	Ind	Thailand	PRJNA795890	T	Ref	3	Ref	WT	Ref	Ref	del	Ref	Alt	Ref	Ref	T	WT
IRIS-11707	KHAO SAHKORN	16.8264	100.26	V12	Ind	Thailand	PRJNA795890	T	Ref	3	Ref	WT	Ref	1_2	del	Ref	Alt	Ref	Ref	T	WT
3K177	KHAO SIM	13.0394	101.492	V12	Ind	Thailand	PRJNA795890	T	2	3	Ref	WT	Ref	1_2	del	glutinous	Alt	Ref	Ref	T	WT
IRIS-11093	KHAO TAM	18.55	103.733	V4	Jap	Laos	PRJNA795890	T	2	3	Ref	large	Ref	Ref	del	glutinous	Alt	Ref	Ref	T	WT
3K083	KHAO THAMA	17.9628	102.614	V12	Ind	Laos	PRJNA795890	0	Ref	Ref	Ref	0.95kb	Ref	1_2	del	glutinous	Alt	Ref	Ref	T	WT
IRIS-11708	KHAO YAI GUANG	12.6756	101.278	V12	Ind	Thailand	PRJNA795890	T	Ref	3	Ref	WT	Ref	1_2	del	Ref	Alt	Ref	Ref	T	WT
IRIS-8398	KHARSU 80	30.3958	69.3625	V9	Aus	Pakistan	PRJNA795890	T	Ref	2	Ref	WT	Ref	1_2	Rc	Ref	Alt	qSH3	Ref	C	WT
3K106	KHAU TRA BONG	21.6667	103.167	V4	Jap	VietNam	PRJNA795890	T	2	3	Ref	1.2kb	Ref	Ref	del	Ref	Alt	Ref	Ref	T	WT
IRIS-11195	KHAW KAR 13	18.6836	96.6831	V4	Jap	Myanmar	PRJNA795890	T	Ref	6	Ref	large	Ref	Ref	Rc	Ref	Alt	Ref	Ref	T	WT
IRIS-12263	KHIE TOM	15.5097	105.993	V12	Ind	Laos	PRJNA795890	T	2	3	Ref	0.95kb	Ref	Ref	del	Ref	Alt	Ref	Ref	T	WT
IRIS-12037	KHMAO KDET	11.3644	104.103	V12	Ind	Cambodia	PRJNA795890	T	Ref	Ref	Ref	WT	Ref	1_2	del	Ref	Alt	Ref	Ref	T	WT
3K209	KHSAY VENG	11.5761	104.284	V12	Ind	Cambodia	PRJNA795890	T	Ref	2	Ref	WT	Ref	1_2	del	Ref	Alt	Ref	Ref	T	WT
IRIS-11814	KIKUBA	#N/A	#N/A	V12	Ind	Kenya	PRJNA795890	T	Ref	Ref	Ref	WT	Ref	1_2	del	Ref	Alt	Ref	Ref	T	WT
IRIS-10952	KILANG MEDU	-3.29472	104.142	V10	Jap	Indonesia	PRJNA795890	T	2	2	Ref	WT	Ref	Ref	del	Ref	Alt	qSH3	Ref	T	T13
IRIS-11780	KILOMBERO	#N/A	#N/A	V12	Ind	Tanzania	PRJNA795890	T	Ref	3	Ref	WT	Ref	1_2	del	Ref	Alt	Ref	Ref	T	WT
IRIS-9389	KINANDANG BUSIKSIK	14	121.083	V10	Jap	Philippines	PRJNA795890	T	Ref	2	Ref	1.2kb	Ref	Ref	del	Ref	Alt	Ref	Ref	T	T13
IRIS-11473	KINTOMAN	16.8114	120.712	V10	Jap	Philippines	PRJNA795890	T	Ref	Ref	Ref	large	Ref	Ref	Rc	Ref	Alt	Ref	Ref	A	T13
Kitaake	Kitaake	#N/A	#N/A	V2	Jap	Japan	SRR090729	0	Ref	Ref	Ref	WT	Ref	Ref	del	Ref	Ref	Ref	Ref	A	WT
3K214	KOLA MUCHI	23.6117	90.3397	V12	Ind	Bangladesh	PRJNA795890	T	Ref	2	Ref	0.95kb	Ref	1_2	Rc	Ref	Alt	Ref	Ref	T	WT
IRIS-8681	KOLITONDO	#N/A	#N/A	V11	Ind	Guinea	PRJNA795890	T	Ref	Ref	Ref	WT	Ref	1_2	del	Ref	Alt	Ref	Ref	T	WT
IRIS-11793	KOMALIOKO	#N/A	#N/A	V8	Ind	Madagascar	PRJNA795890	T	Ref	Ref	Ref	WT	Ref	Ref	del	Ref	Alt	Ref	Ref	T	WT
UL080	Komapatai	#N/A	#N/A	V1	Jap	Taiwan	PRJNA485658	indigenous	Ref	3	Ref	1.2kb	Ref	Ref	del	glutinous	Alt	Ref	Ref	A	WT
UL087	Komonawai	#N/A	#N/A	V1	Jap	Taiwan	PRJNA485658	indigenous	Ref	3	Ref	WT	Ref	Ref	del	glutinous	Alt	Ref	Ref	A	WT
IRIS-11935	KONG KHSACH BANG KATT	12.3008	104.983	V12	Ind	Cambodia	PRJNA795890	T	Ref	Ref	Ref	WT	Ref	1_2	del	Ref	Alt	Ref	Ref	T	WT
3K112	KONTOL 86	2.03028	109.642	V11	Ind	Malaysia	PRJNA795890	T	2	Ref	Ref	0.95kb	Ref	1_2	del	Ref	Alt	Ref	Ref	T	WT
IRIS-11724	KONYAN	#N/A	#N/A	V12	Ind	Guinea	PRJNA795890	T	2	Ref	Ref	0.95kb	Ref	1_2	Rc	Ref	Alt	Ref	Ref	T	WT
UL089	Koodngoi	#N/A	#N/A	V1	Jap	Taiwan	PRJNA485658	indigenous	2	3	Ref	1.2kb	Ref	Ref	del	glutinous	Alt	Ref	Ref	T	WT
3K104	KORASISI	13.1114	121.047	V13	Ind	Philippines	PRJNA795890	T	2	Ref	Ref	WT	2	1_2	del	Ref	Alt	Ref	Ref	T	WT
IRIS-11116	KORTIK KAIKA	23.6117	90.3397	V9	Aus	Bangladesh	PRJNA795890	T	2	2	Ref	WT	Ref	Ref	Rc	Ref	Alt	qSH3	Ref	T	WT
IRIS-8769	KOSAGI	#N/A	#N/A	V10	Jap	Guinea	PRJNA795890	T	Ref	3	Ref	WT	Ref	Ref	del	Ref	Alt	Ref	Ref	T	WT
JAP004	Koshihikari	#N/A	#N/A	V2	Jap	Japan	PRJNA795890	Modern variety	Ref	Ref	Ref	1.2kb	Ref	Ref	del	Ref	Ref	Ref	Ref	A	WT
IRIS-8660	KOTTEYARAN	#N/A	#N/A	V8	Ind	Sri Lanka	PRJNA795890	T	2	Ref	Ref	0.95kb	Ref	Ref	del	Ref	Alt	Ref	Ref	T	WT
LR006	Ko-Tzu	#N/A	#N/A	V13	Ind	Taiwan	PRJNA485658	Ming ching	Ref	2	Ref	0.95kb	2	1_2	del	Ref	Alt	Ref	Ref	T	T7
IRIS-11524	KOUINONEPOU	#N/A	#N/A	V10	Jap	Cote dIvoire	PRJNA795890	T	Ref	3	Ref	WT	Ref	Ref	del	Ref	Alt	Ref	Ref	T	T13
IRIS-8283	KOYRA	23.5833	91	V9	Aus	Bangladesh	PRJNA795890	T	Ref	2	Ref	WT	Ref	Ref	Rc	Ref	Alt	qSH3	Ref	C	WT
3K164	KREM KRAHAM	13.1	103.2	V12	Ind	Cambodia	PRJNA795890	T	Ref	Ref	Ref	WT	Ref	1_2	del	Ref	Alt	Ref	Ref	T	WT
IRIS-9210	KUATEK	2.03028	109.642	V11	Ind	Malaysia	PRJNA795890	T	Ref	Ref	Ref	0.95kb	Ref	1_2	del	Ref	Alt	Ref	Ref	T	WT
IRIS-12046	KUJAM KURIT	0.5	112	V11	Ind	Indonesia	PRJNA795890	T	Ref	Ref	Ref	WT	Ref	1_2	del	Ref	Alt	Ref	Ref	T	WT
IRIS-12058	KUL REUSEI	11.8825	104.668	V12	Ind	Cambodia	PRJNA795890	T	Ref	Ref	Ref	0.95kb	Ref	1_2	del	Ref	Alt	Ref	Ref	T	WT
IRIS-8492	KUNENG	5.53333	115.567	V11	Ind	Malaysia	PRJNA795890	T	Ref	Ref	Ref	WT	Ref	1_2	del	Ref	Alt	Ref	Ref	T	WT
UL229	KUNGSHANWUSHENKEN	#N/A	#N/A	V2	Jap	Taiwan	PRJNA485658	indigenous	Ref	Ref	Ref	1.2kb	Ref	Ref	Rc	Ref	Alt	Ref	Ref	A	WT
IRIS-10905	KUOL DAUN THNONG	13.1	103.2	V12	Ind	Cambodia	PRJNA795890	T	Ref	3	Ref	WT	2	1_2	del	Ref	Alt	Ref	Ref	T	WT
IRIS-9861	KURKARUPPAN	9.65472	80.0642	V9	Aus	Sri Lanka	PRJNA795890	T	Ref	2	Ref	WT	Ref	1_2	Rc	Ref	Alt	qSH3	Ref	C	WT
IRIS-8342	KURULU WEE	6.05889	80.6319	V9	Aus	Sri Lanka	PRJNA795890	T	Ref	2	Ref	WT	Ref	1_2	Rc	Ref	Alt	qSH3	Ref	C	T13
IRIS-8925	KURULUTUDU	6.7	80.3833	V8	Ind	Sri Lanka	PRJNA795890	T	2	Ref	Ref	0.95kb	Ref	Ref	Rc	Ref	Alt	Ref	Ref	C	WT
IRIS-9174	KUSHIARA	23.6117	90.3397	V12	Ind	Bangladesh	PRJNA795890	T	Ref	Ref	Ref	0.95kb	Ref	Ref	del	Ref	Alt	Ref	Ref	T	WT
3K128	KUSUM KATIKI	26.9617	85.5742	V8	Ind	Nepal	PRJNA795890	T	Ref	2	Ref	0.95kb	Ref	1_2	del	Ref	Alt	Ref	Ref	T	WT
IRIS-8723	KUTAI PAYA	2.03028	109.642	V11	Ind	Malaysia	PRJNA795890	T	Ref	3	Ref	WT	2	1_2	del	Ref	Alt	Ref	Ref	T	WT
IRIS-8924	KUTTA	26.905	75.8011	V8	Ind	India	PRJNA795890	T	Ref	Ref	Ref	0.95kb	Ref	Ref	Rc	Ref	Alt	Ref	Ref	T	T20
UL231	KWANFUHSIANGNUO	#N/A	#N/A	V1	Jap	Taiwan	PRJNA485658	indigenous	Ref	3	Ref	1.2kb	Ref	Ref	Rc	glutinous	Alt	Ref	Ref	T	WT
IRIS-10787	KWATIK PUTIH	-3.1225	115.905	V11	Ind	Indonesia	PRJNA795890	T	2	Ref	Ref	WT	Ref	1_2	del	het	Alt	Ref	Ref	het	WT
IRIS-10082	KYUUSHUU	34.7839	134.375	V5	Jap	Japan	PRJNA795890	T	2	Ref	Ref	1.2kb	Ref	Ref	del	Ref	Alt	Ref	Ref	T	WT
IRIS-12000	LAANG	12.0908	105.066	V12	Ind	Cambodia	PRJNA795890	T	Ref	Ref	Ref	0.95kb	Ref	1_2	del	Ref	Alt	Ref	Ref	T	WT
IRIS-12346	Lab	19.6806	100.535	V4	Jap	Laos	PRJNA795890	T	2	3	2	1.2kb	Ref	Ref	del	glutinous	Alt	Ref	Ref	T	WT
IRIS-9547	LABRA	20.1667	80.3333	V8	Ind	India	PRJNA795890	T	Ref	Ref	Ref	WT	Ref	1_2	del	Ref	Alt	Ref	Ref	T	WT
IRIS-12347	LAI DAM	19.6	103.795	V4	Jap	Laos	PRJNA795890	T	2	3	Ref	1.2kb	Ref	Ref	del	Ref	Alt	Ref	Ref	T	WT
IRIS-11077	Lai hang hma	18.2803	103.861	V4	Jap	Laos	PRJNA795890	T	Ref	3	2	1.2kb	Ref	Ref	del	glutinous	Alt	Ref	Ref	T	WT
3K033	Lai nok kha	17.6383	105.219	V12	Ind	Laos	PRJNA795890	T	2	2	Ref	0.95kb	Ref	1_2	Rc	Ref	Alt	Ref	Ref	T	WT
LR123	LAI YIP ZIM	#N/A	#N/A	V13	Ind	Taiwan	PRJNA485658	Ming ching	Ref	Ref	Ref	0.95kb	Ref	Ref	del	Ref	Alt	Ref	Ref	T	WT
IRIS-11919	LAKHA KUAR	23.9833	80.3333	V8	Ind	India	PRJNA795890	T	2	Ref	Ref	WT	Ref	Ref	del	Ref	Alt	Ref	Ref	T	T20
IRIS-10976	LAKHSMI DIGHA	23.6117	90.3397	V9	Aus	Bangladesh	PRJNA795890	T	Ref	2	Ref	WT	Ref	Ref	Rc	Ref	Alt	qSH3	Ref	C	T13
IRIS-11487	LALDIGHA	23.2239	90.0256	V8	Ind	Bangladesh	PRJNA795890	T	Ref	Ref	Ref	WT	Ref	Ref	Rc	Ref	Alt	qSH3	Ref	T	WT
IRIS-11828	LALI GURMATIA	21.1278	82.8006	V8	Ind	India	PRJNA795890	T	Ref	2	Ref	0.95kb	Ref	Ref	del	Ref	Alt	Ref	Ref	T	WT
IRIS-10010	LALKA	#N/A	#N/A	V8	Ind	Fiji	PRJNA795890	T	Ref	2	Ref	0.95kb	Ref	Ref	del	Ref	Alt	Ref	Ref	T	WT
IRIS-8789	LALSAITA	23.8917	90.2728	V9	Aus	Bangladesh	PRJNA795890	T	Ref	2	Ref	WT	Ref	1_2	Rc	Ref	Alt	qSH3	Ref	T	T13
IRIS-12222	Lam Boun	16.3831	105.258	V12	Ind	Laos	PRJNA795890	T	Ref	3	Ref	0.95kb	Ref	1_2	del	glutinous	Alt	Ref	Ref	T	WT
IRIS-10999	LANDEO	-1.33333	121.167	V10	Jap	Indonesia	PRJNA795890	T	Ref	3	Ref	WT	Ref	Ref	del	Ref	Alt	Ref	Ref	T	T13
3K022	LANG QIAN CHE	#N/A	#N/A	V13	Ind	China	PRJNA795890	0	Ref	Ref	Ref	0.95kb	Ref	1_2	Rc	Ref	Alt	Ref	Ref	T	T7
IRIS-10993	LANNAB	17.1303	121.301	V10	Jap	Philippines	PRJNA795890	T	2	3	Ref	large	Ref	Ref	Rc	Ref	Alt	Ref	Ref	T	T13
IRIS-12002	LARA BORO	24.3356	91.4264	V9	Aus	Bangladesh	PRJNA795890	T	Ref	Ref	Ref	WT	Ref	Ref	Rc	Ref	Alt	qSH3	Ref	T	T13
IRIS-8568	LARHA MUGAD	16.4589	74.2022	V8	Ind	India	PRJNA795890	T	Ref	2	Ref	WT	Ref	Ref	del	Ref	Alt	Ref	Ref	T	WT
IRIS-10690	LARONDJAWI	-7.35278	109.639	V11	Ind	Indonesia	PRJNA795890	T	Ref	Ref	Ref	WT	Ref	1_2	del	Ref	Alt	Ref	Ref	T	WT
3K114	LASAT PUTIH	#N/A	#N/A	V10	Jap	Malaysia	PRJNA795890	T	Ref	2	Ref	WT	Ref	Ref	del	Ref	Alt	Ref	Ref	A	T13
IRIS-8349	LATA MONA	22.7	90.3667	V8	Ind	Bangladesh	PRJNA795890	T	2	2	Ref	0.95kb	Ref	Ref	del	Ref	Alt	Ref	Ref	T	WT
IRIS-11629	LATIJHABAR	27.1364	86.7158	V9	Aus	Nepal	PRJNA795890	T	Ref	Ref	Ref	WT	Ref	Ref	Rc	Ref	Alt	qSH3	Ref	T	T13
IRIS-11337	LAWA-AN	8.47639	123.39	V10	Jap	Philippines	PRJNA795890	T	Ref	2	Ref	large	Ref	Ref	del	Ref	Alt	Ref	Ref	A	T13
IRIS-9129	LAYANDABU	-2.69056	119.026	V10	Jap	Indonesia	PRJNA795890	T	Ref	3	Ref	WT	Ref	Ref	del	Ref	Alt	Ref	Ref	T	T13
3K109	LEKATAN	5.38333	115.417	V10	Jap	Malaysia	PRJNA795890	T	2	3	Ref	WT	Ref	Ref	del	glutinous	Alt	Ref	Ref	A	T13
IRIS-12047	LEMAK RUSA	-2.5	110.083	V11	Ind	Indonesia	PRJNA795890	T	Ref	Ref	Ref	0.95kb	Ref	1_2	del	Ref	Alt	Ref	Ref	T	WT
IRIS-10788	LEMUNGSIR	-6.75	107.5	V7	Jap	Indonesia	PRJNA795890	T	2	3	Ref	0.95kb	Ref	Ref	del	Ref	Alt	Ref	Ref	A	WT
IRIS-10789	LENGGANG GENUK BULU	-6.96889	110.124	V7	Jap	Indonesia	PRJNA795890	T	2	3	Ref	0.95kb	Ref	Ref	del	Ref	Alt	Ref	Ref	A	WT
IRIS-9661	LENJA MURALI	25.0167	92.2167	V9	Aus	Bangladesh	PRJNA795890	T	Ref	2	Ref	0.95kb	Ref	1_2	Rc	Ref	Alt	qSH3	Ref	T	T13
3K178	LENKIBE-N	16.2594	121.113	V10	Jap	Philippines	PRJNA795890	T	Ref	3	Ref	WT	Ref	Ref	Rc	Ref	Alt	Ref	Ref	T	T13
IRIS-8468	LEONG ORN 4135	2.03028	109.642	V11	Ind	Malaysia	PRJNA795890	T	Ref	Ref	Ref	WT	Ref	1_2	del	Ref	Alt	Ref	Ref	T	WT
IRIS-8785	LEUANG AWN	14.4742	100.118	V12	Ind	Thailand	PRJNA795890	T	Ref	3	Ref	WT	Ref	Ref	del	Ref	Alt	Ref	Ref	T	WT
IRIS-9020	LEUANG CHAIYAPHUM	14.8333	100.667	V12	Ind	Thailand	PRJNA795890	T	2	3	Ref	WT	Ref	1_2	del	Ref	Alt	Ref	Ref	T	WT
IRIS-8895	LEUANG DAM	#N/A	#N/A	V12	Ind	Thailand	PRJNA795890	T	Ref	3	Ref	WT	Ref	Ref	del	Ref	Alt	Ref	Ref	T	WT
IRIS-9123	LEUANG GLIANG	14.4742	100.118	V4	Jap	Thailand	PRJNA795890	T	2	3	Ref	WT	Ref	Ref	del	Ref	Alt	Ref	Ref	T	WT
IRIS-11709	LEUANG KHAJAWN	13.2017	101.252	V12	Ind	Thailand	PRJNA795890	T	Ref	3	Ref	WT	Ref	1_2	het	Ref	Alt	Ref	Ref	T	WT
IRIS-9209	LEUANG LAI MAE PRAJAN	19.1917	99.8792	V12	Ind	Thailand	PRJNA795890	T	Ref	3	Ref	WT	Ref	Ref	del	Ref	Alt	Ref	Ref	T	WT
3K044	LEUANG MAI	16.8264	100.26	V12	Ind	Thailand	PRJNA795890	T	Ref	3	Ref	WT	Ref	Ref	del	Ref	Alt	Ref	Ref	T	WT
IRIS-11389	LEUANG PRA TAHN	13.5469	100.273	V12	Ind	Thailand	PRJNA795890	T	Ref	3	Ref	WT	Ref	1_2	del	Ref	Alt	Ref	Ref	T	WT
IRIS-9406	LEUANG SAWED	12.8667	101.867	V12	Ind	Thailand	PRJNA795890	T	Ref	3	Ref	WT	Ref	1_2	del	Ref	Alt	Ref	Ref	T	WT
IRIS-11838	LEUM DERN	14.88	103.49	V12	Ind	Thailand	PRJNA795890	T	Ref	3	Ref	WT	Ref	Ref	del	Ref	Alt	Ref	Ref	T	WT
IRIS-12321	LG 10344	15.4403	106.506	V4	Jap	Laos	PRJNA795890	T	2	3	Ref	1.2kb	Ref	Ref	Rc	glutinous	Alt	Ref	Ref	T	T12
IRIS-12059	LIGEN 2	25.1969	102.021	V2	Jap	China	PRJNA795890	0	2	Ref	Ref	1.2kb	Ref	Ref	Rc	Ref	Ref	Ref	Ref	A	WT
IRIS-12048	LIMA	-1.5	110	V11	Ind	Indonesia	PRJNA795890	T	Ref	Ref	Ref	WT	Ref	1_2	del	Ref	Alt	Ref	Ref	T	WT
IRIS-9558	LIMBAYAN	5.21667	116.083	V10	Jap	Malaysia	PRJNA795890	T	Ref	3	Ref	1.2kb	Ref	Ref	del	Ref	Alt	Ref	Ref	T	T13
IRIS-11381	LINANGAN	16.8775	121.258	V11	Ind	Philippines	PRJNA795890	T	Ref	Ref	Ref	WT	Ref	Ref	Rc	Ref	Alt	Ref	Ref	T	WT
IRIS-10452	LING TA 150	#N/A	#N/A	V13	Ind	China	PRJNA795890	P	Ref	2	Ref	0.95kb	2	Ref	Rc	Ref	Alt	Ref	Ref	T	T7
LR165	LingHo	#N/A	#N/A	V6	Ind	Taiwan	PRJNA485658	Ming ching	Ref	2	Ref	0.95kb	Ref	1_2	Rc	Ref	Alt	Ref	Ref	T	WT
IRIS-11881	LIU TIAO XIAN	#N/A	#N/A	V13	Ind	China	PRJNA795890	0	Ref	Ref	Ref	0.95kb	2	1_2	het	Ref	Alt	Ref	Ref	T	WT
LR177	LiuTouZai	#N/A	#N/A	V13	Ind	Taiwan	PRJNA485658	Ming ching	2	2	Ref	0.95kb	Ref	1_2	del	Ref	Alt	Ref	Ref	T	WT
LN_W102	LN_W102	#N/A	#N/A	V2	Jap	China	PRJNA295802	weedy rice	Ref	Ref	Ref	WT	Ref	Ref	Rc	Ref	Alt	Ref	Ref	A	WT
LN_W11	LN_W11	#N/A	#N/A	V2	Jap	China	PRJNA295802	weedy rice	Ref	Ref	Ref	WT	Ref	Ref	Rc	Ref	Alt	Ref	Ref	A	WT
LN_W12	LN_W12	#N/A	#N/A	V2	Jap	China	PRJNA295802	weedy rice	Ref	Ref	Ref	WT	Ref	Ref	Rc	Ref	Alt	Ref	Ref	A	WT
LN_W14	LN_W14	#N/A	#N/A	V2	Jap	China	PRJNA295802	weedy rice	Ref	Ref	Ref	WT	Ref	Ref	Rc	Ref	Alt	Ref	Ref	A	WT
LN_W15	LN_W15	#N/A	#N/A	V2	Jap	China	PRJNA295802	weedy rice	Ref	Ref	Ref	WT	Ref	Ref	Rc	Ref	Alt	Ref	Ref	A	WT
LN_W16	LN_W16	#N/A	#N/A	V2	Jap	China	PRJNA295802	weedy rice	Ref	Ref	Ref	WT	Ref	Ref	Rc	Ref	Alt	Ref	Ref	A	WT
LN_W17	LN_W17	#N/A	#N/A	V2	Jap	China	PRJNA295802	weedy rice	Ref	Ref	Ref	WT	Ref	Ref	Rc	Ref	Alt	Ref	Ref	A	WT
LN_W18	LN_W18	#N/A	#N/A	V2	Jap	China	PRJNA295802	weedy rice	Ref	Ref	Ref	WT	Ref	Ref	Rc	Ref	Alt	Ref	Ref	A	WT
LN_W19	LN_W19	#N/A	#N/A	V2	Jap	China	PRJNA295802	weedy rice	Ref	Ref	Ref	WT	Ref	Ref	Rc	Ref	Alt	Ref	Ref	A	WT
LN_W23	LN_W23	#N/A	#N/A	V2	Jap	China	PRJNA295802	weedy rice	Ref	Ref	Ref	WT	Ref	Ref	Rc	Ref	Alt	Ref	Ref	A	WT
LN_W24	LN_W24	#N/A	#N/A	V2	Jap	China	PRJNA295802	weedy rice	Ref	Ref	Ref	WT	Ref	Ref	Rc	Ref	Alt	Ref	Ref	A	WT
LN_W25	LN_W25	#N/A	#N/A	V2	Jap	China	PRJNA295802	weedy rice	Ref	Ref	Ref	WT	Ref	Ref	Rc	Ref	Alt	Ref	Ref	A	WT
LN_W26	LN_W26	#N/A	#N/A	V9	Ind	China	PRJNA295802	weedy rice	Ref	2	Ref	WT	Ref	Ref	Rc	Ref	Alt	qSH3	Ref	C	T13
LN_W27	LN_W27	#N/A	#N/A	V2	Jap	China	PRJNA295802	weedy rice	Ref	Ref	Ref	WT	Ref	Ref	Rc	Ref	Alt	Ref	Ref	A	WT
LN_W28	LN_W28	#N/A	#N/A	V2	Jap	China	PRJNA295802	weedy rice	Ref	Ref	Ref	WT	Ref	Ref	Rc	Ref	Alt	Ref	Ref	A	WT
LN_W30	LN_W30	#N/A	#N/A	V2	Jap	China	PRJNA295802	weedy rice	Ref	Ref	Ref	WT	Ref	Ref	Rc	Ref	Alt	Ref	Ref	A	WT
LN_W31	LN_W31	#N/A	#N/A	V2	Jap	China	PRJNA295802	weedy rice	Ref	Ref	Ref	WT	Ref	Ref	Rc	Ref	Alt	Ref	Ref	A	WT
LN_W32	LN_W32	#N/A	#N/A	V2	Jap	China	PRJNA295802	weedy rice	Ref	Ref	Ref	WT	Ref	Ref	Rc	Ref	Alt	Ref	Ref	A	WT
LN_W33	LN_W33	#N/A	#N/A	V2	Jap	China	PRJNA295802	weedy rice	Ref	Ref	Ref	WT	Ref	Ref	Rc	Ref	Alt	Ref	Ref	A	WT
LN_W34	LN_W34	#N/A	#N/A	V2	Jap	China	PRJNA295802	weedy rice	Ref	Ref	Ref	WT	Ref	Ref	Rc	Ref	Alt	Ref	Ref	A	WT
LN_W35	LN_W35	#N/A	#N/A	V2	Jap	China	PRJNA295802	weedy rice	Ref	Ref	Ref	WT	Ref	Ref	Rc	Ref	Alt	Ref	Ref	A	WT
LN_W36	LN_W36	#N/A	#N/A	V2	Jap	China	PRJNA295802	weedy rice	Ref	Ref	Ref	WT	Ref	Ref	Rc	Ref	Alt	Ref	Ref	A	WT
LN_W37	LN_W37	#N/A	#N/A	V2	Jap	China	PRJNA295802	weedy rice	Ref	Ref	Ref	WT	Ref	Ref	Rc	Ref	Alt	Ref	Ref	A	WT
LN_W39	LN_W39	#N/A	#N/A	V2	Jap	China	PRJNA295802	weedy rice	Ref	Ref	Ref	WT	Ref	Ref	Rc	Ref	Alt	Ref	Ref	A	WT
LN_W40	LN_W40	#N/A	#N/A	V2	Jap	China	PRJNA295802	weedy rice	Ref	Ref	Ref	WT	Ref	Ref	Rc	Ref	Alt	Ref	Ref	A	WT
LN_W42	LN_W42	#N/A	#N/A	V2	Jap	China	PRJNA295802	weedy rice	Ref	Ref	Ref	WT	Ref	Ref	Rc	Ref	Alt	Ref	Ref	A	WT
LN_W43	LN_W43	#N/A	#N/A	V2	Jap	China	PRJNA295802	weedy rice	Ref	Ref	Ref	WT	Ref	Ref	Rc	Ref	Alt	Ref	Ref	A	WT
LN_W44	LN_W44	#N/A	#N/A	V2	Jap	China	PRJNA295802	weedy rice	Ref	Ref	Ref	WT	Ref	Ref	Rc	Ref	Alt	Ref	Ref	het	WT
LN_W49	LN_W49	#N/A	#N/A	V2	Jap	China	PRJNA295802	weedy rice	Ref	Ref	Ref	1.2kb	Ref	Ref	Rc	Ref	Alt	Ref	Ref	A	WT
LN_W50	LN_W50	#N/A	#N/A	V2	Jap	China	PRJNA295802	weedy rice	Ref	Ref	Ref	1.2kb	Ref	Ref	Rc	Ref	Alt	Ref	Ref	A	WT
LN_W51	LN_W51	#N/A	#N/A	V2	Jap	China	PRJNA295802	weedy rice	Ref	Ref	Ref	1.2kb	Ref	Ref	Rc	Ref	Alt	Ref	Ref	A	WT
LN_W58	LN_W58	#N/A	#N/A	V2	Jap	China	PRJNA295802	weedy rice	Ref	Ref	Ref	WT	Ref	Ref	Rc	Ref	Alt	Ref	Ref	A	WT
LN_W59	LN_W59	#N/A	#N/A	V2	Jap	China	PRJNA295802	weedy rice	Ref	Ref	Ref	WT	Ref	Ref	Rc	Ref	Alt	Ref	Ref	A	WT
LN_W60	LN_W60	#N/A	#N/A	V2	Jap	China	PRJNA295802	weedy rice	Ref	Ref	Ref	WT	Ref	Ref	del	Ref	Alt	Ref	Ref	A	WT
LN_W61	LN_W61	#N/A	#N/A	V2	Jap	China	PRJNA295802	weedy rice	Ref	Ref	Ref	WT	Ref	Ref	Rc	Ref	Alt	Ref	Ref	A	WT
LN_W62	LN_W62	#N/A	#N/A	V2	Jap	China	PRJNA295802	weedy rice	Ref	Ref	Ref	WT	Ref	Ref	Rc	Ref	Alt	Ref	Ref	A	WT
LN_W63	LN_W63	#N/A	#N/A	V2	Jap	China	PRJNA295802	weedy rice	Ref	Ref	Ref	WT	Ref	Ref	Rc	Ref	Alt	Ref	Ref	A	WT
LN_W64	LN_W64	#N/A	#N/A	V2	Jap	China	PRJNA295802	weedy rice	Ref	Ref	Ref	WT	Ref	Ref	Rc	Ref	Alt	Ref	Ref	A	WT
LN_W65	LN_W65	#N/A	#N/A	V2	Jap	China	PRJNA295802	weedy rice	Ref	Ref	Ref	WT	Ref	Ref	het	Ref	Ref	Ref	Ref	A	WT
LN_W67	LN_W67	#N/A	#N/A	V2	Jap	China	PRJNA295802	weedy rice	Ref	Ref	Ref	1.2kb	Ref	Ref	Rc	Ref	Alt	Ref	Ref	A	WT
LN_W68	LN_W68	#N/A	#N/A	V2	Jap	China	PRJNA295802	weedy rice	Ref	Ref	Ref	1.2kb	Ref	Ref	del	Ref	het	Ref	Ref	A	T13
LN_W71	LN_W71	#N/A	#N/A	V2	Jap	China	PRJNA295802	weedy rice	Ref	Ref	Ref	WT	Ref	Ref	Rc	Ref	Alt	Ref	Ref	A	WT
LN_W72	LN_W72	#N/A	#N/A	V2	Jap	China	PRJNA295802	weedy rice	Ref	Ref	Ref	WT	Ref	Ref	Rc	Ref	Alt	Ref	Ref	A	WT
LN_W73	LN_W73	#N/A	#N/A	V2	Jap	China	PRJNA295802	weedy rice	Ref	Ref	Ref	WT	Ref	Ref	het	Ref	Ref	Ref	Ref	A	WT
LN_W74	LN_W74	#N/A	#N/A	V2	Jap	China	PRJNA295802	weedy rice	Ref	Ref	Ref	WT	Ref	Ref	het	Ref	Alt	Ref	Ref	A	WT
LN_W75	LN_W75	#N/A	#N/A	V2	Jap	China	PRJNA295802	weedy rice	Ref	Ref	Ref	WT	Ref	Ref	Rc	Ref	Alt	Ref	Ref	het	WT
LN_W76	LN_W76	#N/A	#N/A	V13	Ind	China	PRJNA295802	weedy rice	Ref	2	Ref	0.95kb	Ref	1_2	del	Ref	Alt	Ref	Ref	T	T7
LN_W78	LN_W78	#N/A	#N/A	V2	Jap	China	PRJNA295802	weedy rice	Ref	Ref	Ref	WT	Ref	Ref	Rc	Ref	Alt	Ref	Ref	A	WT
LN_W79	LN_W79	#N/A	#N/A	V2	Jap	China	PRJNA295802	weedy rice	Ref	Ref	Ref	1.2kb	Ref	Ref	del	Ref	Ref	Ref	Ref	A	WT
LN_W80	LN_W80	#N/A	#N/A	V2	Jap	China	PRJNA295802	weedy rice	Ref	Ref	Ref	WT	Ref	Ref	Rc	Ref	Alt	Ref	Ref	A	WT
LN_W81	LN_W81	#N/A	#N/A	V2	Jap	China	PRJNA295802	weedy rice	Ref	Ref	Ref	WT	Ref	Ref	Rc	Ref	Alt	Ref	Ref	A	WT
LN_W83	LN_W83	#N/A	#N/A	V13	Ind	China	PRJNA295802	weedy rice	Ref	2	Ref	0.95kb	Ref	1_2	Rc	Ref	Alt	Ref	Ref	T	T7
LN_W84	LN_W84	#N/A	#N/A	V2	Jap	China	PRJNA295802	weedy rice	Ref	Ref	Ref	1.2kb	Ref	Ref	Rc	Ref	het	Ref	Ref	A	WT
LN_W86	LN_W86	#N/A	#N/A	V2	Jap	China	PRJNA295802	weedy rice	Ref	Ref	Ref	1.2kb	Ref	Ref	het	Ref	het	Ref	Ref	A	WT
LN_W88	LN_W88	#N/A	#N/A	V2	Jap	China	PRJNA295802	weedy rice	Ref	Ref	Ref	1.2kb	Ref	Ref	Rc	Ref	Alt	Ref	Ref	A	WT
LN_W89	LN_W89	#N/A	#N/A	V2	Jap	China	PRJNA295802	weedy rice	Ref	Ref	Ref	WT	Ref	Ref	Rc	Ref	Alt	Ref	Ref	A	WT
LN_W90	LN_W90	#N/A	#N/A	V2	Jap	China	PRJNA295802	weedy rice	Ref	Ref	Ref	1.2kb	Ref	Ref	Rc	Ref	Alt	Ref	Ref	A	WT
LN_W96	LN_W96	#N/A	#N/A	V2	Jap	China	PRJNA295802	weedy rice	Ref	Ref	Ref	WT	Ref	Ref	het	Ref	Ref	Ref	Ref	A	WT
LN_W97	LN_W97	#N/A	#N/A	V2	Jap	China	PRJNA295802	weedy rice	Ref	Ref	Ref	1.2kb	Ref	Ref	del	Ref	Ref	Ref	Ref	A	WT
IRIS-11452	LOCAL BHAT	16.4589	74.2022	V9	Aus	India	PRJNA795890	T	Ref	2	Ref	WT	Ref	Ref	Rc	Ref	Alt	Ref	Ref	C	WT
IRIS-9742	LOHAMBITRO	#N/A	#N/A	V10	Jap	Madagascar	PRJNA795890	T	2	3	Ref	WT	Ref	Ref	Rc	Ref	Alt	Ref	Ref	T	T13
IRIS-10790	LOLAWAJI	-8.87194	121.811	V7	Jap	Indonesia	PRJNA795890	T	Ref	3	Ref	0.95kb	Ref	Ref	del	glutinous	Alt	Ref	Ref	T	T13
IRIS-9006	LONG KHI KRAI	18.145	100.141	V12	Ind	Thailand	PRJNA795890	T	Ref	3	Ref	0.95kb	Ref	Ref	del	glutinous	Alt	Ref	Ref	T	WT
3K071	LONG MA	16.5006	105.75	V12	Ind	Laos	PRJNA795890	0	Ref	3	Ref	0.95kb	Ref	Ref	del	glutinous	Alt	Ref	Ref	T	WT
IRIS-11017	LOROI	23.6117	90.3397	V9	Aus	Bangladesh	PRJNA795890	T	Ref	2	Ref	0.95kb	Ref	1_2	Rc	Ref	Alt	qSH3	Ref	C	T13
IRIS-12348	LOUK NOK	21.0842	101.394	V4	Jap	Laos	PRJNA795890	T	2	3	Ref	1.2kb	Ref	Ref	del	glutinous	Alt	Ref	Ref	T	T12
IRIS-9342	LUA CHAN HUONG	#N/A	#N/A	V12	Ind	VietNam	PRJNA795890	T	Ref	3	Ref	WT	Ref	1_2	del	Ref	Alt	Ref	Ref	T	WT
IRIS-10906	LUA NEP 4416	13.1	103.2	V12	Ind	Cambodia	PRJNA795890	T	Ref	5	Ref	0.95kb	Ref	Ref	del	Ref	Alt	Ref	Ref	T	WT
IRIS-10842	LUBUK LINGGAU	-2.69056	119.026	V11	Ind	Indonesia	PRJNA795890	T	Ref	Ref	Ref	0.95kb	Ref	1_2	del	Ref	Alt	Ref	Ref	T	T13
IRIS-10982	LUDI GOCHYA	23.6117	90.3397	V8	Ind	Bangladesh	PRJNA795890	T	Ref	2	Ref	0.95kb	Ref	Ref	Rc	Ref	Alt	Ref	Ref	T	WT
LR189	LungYaChan	#N/A	#N/A	V13	Ind	Taiwan	PRJNA623980	Ming ching	Ref	2	Ref	0.95kb	2	1_2	del	Ref	Alt	Ref	Ref	T	T13
3K072	LWANKHAN	#N/A	#N/A	V12	Ind	Myanmar	PRJNA795890	0	Ref	2	Ref	0.95kb	Ref	1_2	del	glutinous	Alt	Ref	Ref	T	WT
IRIS-11682	MA EUE	15.9717	102.622	V12	Ind	Thailand	PRJNA795890	T	Ref	3	Ref	0.95kb	Ref	Ref	del	glutinous	Alt	Ref	Ref	T	WT
3K075	MA YOO	#N/A	#N/A	V12	Ind	Thailand	PRJNA795890	0	Ref	2	Ref	0.95kb	Ref	Ref	del	glutinous	Alt	Ref	Ref	T	WT
IRIS-10511	MACAN SAPAC	13.1114	121.047	V12	Ind	Philippines	PRJNA795890	T	Ref	3	Ref	WT	Ref	Ref	del	Ref	Alt	Ref	Ref	T	WT
3K225	MACAPAGAL	7.91667	125.083	V11	Ind	Philippines	PRJNA795890	T	Ref	3	Ref	WT	Ref	1_2	del	Ref	Alt	Ref	Ref	T	WT
IRIS-11018	MADISA	23.6117	90.3397	V9	Aus	Bangladesh	PRJNA795890	T	Ref	2	Ref	0.95kb	2	1_2	Rc	Ref	Alt	qSH3	Ref	C	T13
IRIS-12049	Mae hang	16.4967	104.906	V12	Ind	Laos	PRJNA795890	T	Ref	2	Ref	0.95kb	Ref	1_2	del	glutinous	Alt	Ref	Ref	T	WT
IRIS-11609	MAE HAWM	13.0394	101.492	V11	Ind	Thailand	PRJNA795890	T	Ref	Ref	Ref	WT	Ref	1_2	del	Ref	Alt	Ref	Ref	T	WT
3K057	MAE MAI LUD NI	18.145	100.141	V12	Ind	Thailand	PRJNA795890	T	Ref	2	Ref	0.95kb	Ref	Ref	del	glutinous	Alt	Ref	Ref	T	WT
IRIS-9575	MAE YEU	17.0056	99.8264	V12	Ind	Thailand	PRJNA795890	T	Ref	3	Ref	WT	Ref	Ref	del	Ref	Alt	Ref	Ref	T	WT
IRIS-10097	MAEKJO	35.2094	128.538	V2	Jap	South Korea	PRJNA795890	T	Ref	Ref	Ref	1.2kb	Ref	Ref	del	Ref	Alt	Ref	Ref	A	WT
IRIS-11000	MAIRUL	-2.69056	119.026	V11	Ind	Indonesia	PRJNA795890	T	2	Ref	Ref	0.95kb	Ref	1_2	del	Ref	Alt	Ref	Ref	T	T7
IRIS-11094	MAK BOUAP	16.4633	105.204	V4	Jap	Laos	PRJNA795890	T	Ref	3	2	1.2kb	Ref	Ref	del	glutinous	Alt	Ref	Ref	T	WT
3K084	Mak ea nam	16.5006	105.75	V12	Ind	Laos	PRJNA795890	T	Ref	Ref	Ref	0.95kb	Ref	Ref	del	glutinous	Alt	Ref	Ref	T	WT
IRIS-12350	MAK KHEUA KANG	20.6547	101.467	V4	Jap	Laos	PRJNA795890	T	2	3	Ref	1.2kb	Ref	Ref	del	glutinous	Alt	Ref	Ref	T	T12
3K091	Mak nam	20.3464	100.678	V12	Ind	Laos	PRJNA795890	T	Ref	2	Ref	0.95kb	Ref	Ref	del	glutinous	Alt	Ref	Ref	T	WT
IRIS-8595	MAKALIOKA STANDARD	#N/A	#N/A	V8	Ind	Madagascar	PRJNA795890	0	2	3	Ref	WT	Ref	1_2	del	Ref	Alt	Ref	Ref	C	WT
IRIS-9258	MAKRO	20.1667	80.3333	V8	Ind	India	PRJNA795890	T	Ref	Ref	Ref	0.95kb	Ref	Ref	del	Ref	Alt	Ref	Ref	T	WT
IRIS-11782	MALAGASY	#N/A	#N/A	V8	Ind	Zambia	PRJNA795890	T	Ref	3	Ref	WT	Ref	Ref	del	Ref	Alt	Ref	Ref	C	WT
IRIS-11736	MALAGKIT	14.25	120.75	V10	Jap	Philippines	PRJNA795890	T	Ref	2	Ref	1.2kb	Ref	Ref	Rc	Ref	Alt	Ref	Ref	T	T13
IRIS-10831	MALANDI 2	9.44611	118.393	V10	Jap	Philippines	PRJNA795890	T	2	2	Ref	WT	Ref	Ref	del	Ref	Alt	Ref	Ref	T	T13
IRIS-10832	MALASAY	9.44611	118.393	V10	Jap	Philippines	PRJNA795890	T	2	Ref	Ref	1.2kb	Ref	Ref	del	glutinous	Alt	Ref	Ref	T	T13
IRIS-11945	MALIKULI	23.4167	91.1667	V8	Ind	Bangladesh	PRJNA795890	T	2	Ref	Ref	0.95kb	Ref	1_2	del	Ref	Alt	Ref	Ref	T	WT
3K073	MAMAS	-2.69056	119.026	V11	Ind	Indonesia	PRJNA795890	T	2	3	Ref	0.95kb	Ref	1_2	del	Ref	Alt	Ref	Ref	T	T13
IRIS-9732	MAMORIAKA	#N/A	#N/A	V8	Ind	Madagascar	PRJNA795890	T	Ref	Ref	Ref	WT	Ref	1_2	del	Ref	Alt	Ref	Ref	C	WT
IRIS-11615	MANARE	#N/A	#N/A	V12	Ind	Guinea	PRJNA795890	T	Ref	Ref	Ref	0.95kb	Ref	Ref	del	Ref	Alt	Ref	Ref	T	WT
UL032	Mandarakiku	#N/A	#N/A	V2	Jap	Taiwan	PRJNA485658	indigenous	2	Ref	Ref	WT	Ref	Ref	del	Ref	Alt	Ref	Ref	A	T19
3K010	MANDASHERPO	27.5833	91.15	V4	Jap	Bhutan	PRJNA795890	T	Ref	3	Ref	WT	Ref	Ref	del	Ref	Alt	Ref	Ref	A	WT
IRIS-10946	MANGGE	-2.69056	119.026	V10	Jap	Indonesia	PRJNA795890	0	2	Ref	Ref	1.2kb	Ref	Ref	del	Ref	Alt	qSH3	Ref	T	WT
3K074	MANGSUR	-6.75	107.5	V11	Ind	Indonesia	PRJNA795890	T	Ref	3	Ref	WT	Ref	1_2	del	Ref	Alt	Ref	Ref	T	T13
3K014	MANONGAZATO	#N/A	#N/A	V10	Jap	Madagascar	PRJNA795890	T	Ref	3	Ref	WT	Ref	Ref	del	Ref	Alt	Ref	Ref	T	WT
3K213	MANUS	5.81667	117.433	V11	Ind	Malaysia	PRJNA795890	T	2	3	Ref	WT	2	1_2	del	Ref	Alt	Ref	Ref	T	WT
IRIS-11658	MANYALOJOPOIHUN	#N/A	#N/A	V10	Jap	Sierra Leone	PRJNA795890	T	2	Ref	Ref	WT	Ref	Ref	del	Ref	Alt	Ref	Ref	T	T13
UL135	Maolin23	22.74	120.25	V4	admix	Taiwan	PRJNA485658	indigenous	Ref	3	Ref	0.95kb	Ref	1_2	del	glutinous	Alt	Ref	Ref	A	WT
UL136	Maolin39	22.74	120.25	V6	admix	Taiwan	PRJNA485658	indigenous	Ref	3	Ref	0.95kb	Ref	1_2	del	glutinous	Alt	Ref	Ref	A	WT
UL139	Maolin45	22.74	120.25	V6	admix	Taiwan	PRJNA485658	indigenous	Ref	3	Ref	0.95kb	Ref	1_2	del	glutinous	Alt	Ref	Ref	A	WT
3K131	MARAMAY	13.1114	121.047	V12	Ind	Philippines	PRJNA795890	T	Ref	Ref	Ref	WT	Ref	1_2	del	Ref	Alt	Ref	Ref	T	WT
IRIS-10907	MARECH SVR	13.1	103.2	V12	Ind	Cambodia	PRJNA795890	T	Ref	3	Ref	WT	Ref	1_2	del	glutinous	Alt	Ref	Ref	T	WT
IRIS-11532	MARIA GAKIT	7.91667	125.083	V10	Jap	Philippines	PRJNA795890	T	Ref	3	Ref	large	Ref	Ref	Rc	Ref	Alt	Ref	Ref	T	T13
UL049	Matara	#N/A	#N/A	V4	Jap	Taiwan	PRJNA373799	indigenous	Ref	3	Ref	WT	Ref	Ref	del	het	Alt	Ref	Ref	A	WT
3K034	MATI CHAL	23.6117	90.3397	V8	Ind	Bangladesh	PRJNA795890	T	Ref	2	Ref	0.95kb	Ref	Ref	Rc	Ref	Alt	Ref	Ref	T	WT
3K132	MATIANG	3.8	102.25	V11	Ind	Indonesia	PRJNA795890	T	2	Ref	Ref	WT	Ref	1_2	del	Ref	Alt	Ref	Ref	T	T13
IRIS-12082	MAVOLATSIKA	#N/A	#N/A	V8	Ind	Madagascar	PRJNA795890	T	Ref	3	Ref	WT	Ref	Ref	del	Ref	Alt	Ref	Ref	T	WT
IRIS-11320	MAYAS PUTIH	-2.63111	115.353	V11	Ind	Indonesia	PRJNA795890	T	Ref	3	Ref	WT	2	1_2	del	Ref	Alt	Ref	Ref	T	WT
IRIS-11784	MBEIMBEIHUN	#N/A	#N/A	V8	Ind	Sierra Leone	PRJNA795890	T	Ref	3	Ref	WT	Ref	1_2	del	Ref	Alt	Ref	Ref	T	T13
IRIS-12352	MEE	19.9656	102.425	V4	Jap	Laos	PRJNA795890	T	2	3	2	1.2kb	Ref	Ref	Rc	glutinous	Alt	Ref	Ref	T	T12
IRIS-8493	MELABOH	3.05	97.3333	V11	Ind	Indonesia	PRJNA795890	T	Ref	Ref	Ref	WT	Ref	1_2	del	Ref	Alt	Ref	Ref	T	WT
IRIS-9989	MELEKE	#N/A	#N/A	V12	Ind	Cote dIvoire	PRJNA795890	T	Ref	3	Ref	WT	Ref	1_2	del	Ref	Alt	Ref	Ref	T	WT
3K199	MELIK	-6.96889	110.124	V5	Jap	Indonesia	PRJNA795890	T	2	3	Ref	0.95kb	Ref	Ref	het	Ref	Alt	Ref	Ref	T	T13
3K133	MENDUNGAN	-4.94778	104.852	V10	Jap	Indonesia	PRJNA795890	T	2	3	Ref	WT	Ref	Ref	Rc	Ref	Alt	Ref	Ref	T	WT
IRIS-11809	MHARAKA	#N/A	#N/A	V9	Aus	Kenya	PRJNA795890	T	Ref	Ref	Ref	WT	Ref	Ref	Rc	Ref	Alt	qSH3	Ref	C	T13
UL029	Midon	#N/A	#N/A	V6	Ind	Taiwan	PRJNA485658	indigenous	Ref	2	Ref	0.95kb	Ref	1_2	del	Ref	Alt	Ref	Ref	T	WT
IRIS-11339	MILAGROSA	13.1114	121.047	V8	Ind	Philippines	PRJNA795890	T	2	Ref	Ref	WT	Ref	Ref	del	Ref	Alt	Ref	Ref	T	WT
IRIS-9925	MILYANG 30	#N/A	#N/A	V8	Ind	South Korea	PRJNA795890	I	Ref	2	Ref	1.2kb	Ref	1_2	del	Ref	Alt	Ref	Ref	T	T7
IRIS-10040	MILYANG 77	#N/A	#N/A	V13	Ind	South Korea	PRJNA795890	I	Ref	Ref	Ref	0.95kb	Ref	1_2	del	Ref	Alt	Ref	Ref	T	T7
IRIS-11340	MINANOK	17.635	120.393	V10	Jap	Philippines	PRJNA795890	T	Ref	3	Ref	1.2kb	Ref	Ref	Rc	Ref	Alt	Ref	Ref	T	T13
3K226	MINATANDA	13.9167	121.083	V10	Jap	Philippines	PRJNA795890	T	Ref	2	Ref	1.2kb	Ref	Ref	del	Ref	Alt	Ref	Ref	T	T13
3K228	MINDANAO	18.1775	120.695	V12	Ind	Philippines	PRJNA795890	T	Ref	Ref	Ref	0.95kb	Ref	Ref	del	glutinous	Alt	Ref	Ref	T	WT
IRIS-10749	MINH-SOC	16.4728	106.661	V12	Ind	VietNam	PRJNA795890	T	Ref	2	Ref	WT	Ref	1_2	del	Ref	Alt	Ref	Ref	T	WT
LR182	MinTang	#N/A	#N/A	V6	Ind	Taiwan	PRJNA485658	Ming ching	Ref	Ref	Ref	0.95kb	Ref	1_2	del	Ref	Alt	Ref	Ref	T	WT
3K179	MLATI	-6.96889	110.124	V10	Jap	Indonesia	PRJNA795890	T	Ref	3	Ref	0.95kb	Ref	Ref	del	Ref	Alt	Ref	Ref	T	WT
IRIS-9862	MODDAI KARUPPAN	9.65472	80.0642	V8	Ind	Sri Lanka	PRJNA795890	T	Ref	2	Ref	0.95kb	Ref	Ref	Rc	Ref	Alt	qSH3	Ref	T	WT
IRIS-12353	MOK	20.0936	103.357	V4	Jap	Laos	PRJNA795890	T	Ref	3	Ref	1.2kb	Ref	Ref	del	glutinous	Alt	Ref	Ref	T	WT
IRIS-10796	MOLOG	-6.96889	110.124	V10	Jap	Indonesia	PRJNA795890	T	Ref	3	Ref	WT	Ref	Ref	del	Ref	Alt	Ref	Ref	T	T13
IRIS-12129	Mon Lai	17.7908	105.081	V4	Jap	Laos	PRJNA795890	T	Ref	3	Ref	1.2kb	Ref	Ref	del	glutinous	Alt	Ref	Ref	T	WT
CX306	Mongolia Rice	#N/A	#N/A	V2	Jap	China	PRJNA795890	P	Ref	Ref	Ref	WT	Ref	Ref	del	Ref	Ref	Ref	Ref	A	T19
IRIS-11435	MONMINEUPLEU	#N/A	#N/A	V10	Jap	Cote dIvoire	PRJNA795890	T	2	3	Ref	WT	Ref	Ref	del	Ref	Alt	Ref	Ref	T	T13
UL036	Montana	#N/A	#N/A	V10	Jap	Taiwan	PRJNA373799	indigenous	Ref	3	Ref	WT	Ref	Ref	del	Ref	Alt	Ref	Ref	T	T13
UL221	MONTANO	#N/A	#N/A	V6	Ind	Taiwan	PRJNA485658	indigenous	2	Ref	Ref	0.95kb	Ref	1_2	Rc	Ref	Alt	Ref	Ref	T	WT
3K215	MOONOR	26.5672	87.9139	V8	Ind	Nepal	PRJNA795890	T	Ref	Ref	Ref	0.95kb	Ref	Ref	Rc	Ref	Alt	Ref	Ref	T	WT
IRIS-8768	MOROFIN	#N/A	#N/A	V10	Jap	Cote dIvoire	PRJNA795890	T	2	3	Ref	WT	Ref	Ref	del	Ref	Alt	Ref	Ref	T	T13
IRIS-10908	MOROM	11.41	105.331	V12	Ind	Cambodia	PRJNA795890	T	Ref	Ref	Ref	WT	Ref	1_2	del	Ref	Alt	Ref	Ref	T	WT
IRIS-10489	MOROPOTOL	13.1114	121.047	V10	Jap	Philippines	PRJNA795890	T	2	Ref	Ref	large	Ref	Ref	del	Ref	Alt	Ref	Ref	T	T13
IRIS-11785	MOSHI	#N/A	#N/A	V12	Ind	Tanzania	PRJNA795890	T	Ref	3	Ref	WT	Ref	1_2	del	Ref	Alt	Ref	Ref	T	WT
IRIS-11811	MOSHI	#N/A	#N/A	V8	Ind	Kenya	PRJNA795890	T	Ref	Ref	Ref	0.95kb	Ref	Ref	del	Ref	Alt	Ref	Ref	C	WT
IRIS-11815	MOSHI	#N/A	#N/A	V12	Ind	Kenya	PRJNA795890	T	Ref	3	Ref	WT	Ref	1_2	del	Ref	Alt	Ref	Ref	T	WT
IRIS-11941	MOUI SAMBA	#N/A	#N/A	V12	Ind	Burkina Faso	PRJNA795890	T	Ref	3	Ref	WT	Ref	1_2	del	Ref	Alt	Ref	Ref	T	T7
IRIS-12299	MUANG TAY	16.9936	105.015	V4	Jap	Laos	PRJNA795890	T	Ref	3	2	1.2kb	Ref	Ref	del	Ref	Alt	Ref	Ref	T	WT
IRIS-11839	MUAY	14.9719	102.1	V12	Ind	Thailand	PRJNA795890	T	Ref	3	Ref	0.95kb	Ref	Ref	del	Ref	Alt	Ref	Ref	T	WT
IRIS-11916	MUDALIGA WEE	6.38528	80.0447	V8	Ind	Sri Lanka	PRJNA795890	T	Ref	2	Ref	0.95kb	Ref	Ref	Rc	Ref	Alt	Ref	Ref	C	WT
IRIS-8930	MUKKALA BAZAL	24.3333	91.6667	V11	Ind	Bangladesh	PRJNA795890	T	Ref	3	Ref	0.95kb	Ref	1_2	del	Ref	Alt	Ref	Ref	T	T7
IRIS-9557	MULLIKURUVA	11.5	76.5	V8	Ind	India	PRJNA795890	T	2	Ref	Ref	0.95kb	Ref	Ref	del	Ref	Alt	Ref	Ref	T	WT
UL045	Munagurusu	#N/A	#N/A	V2	Jap	Taiwan	PRJNA485658	indigenous	2	Ref	Ref	WT	Ref	Ref	del	Ref	Alt	Ref	Ref	het	WT
3K180	MUNJI	34.8261	71.8425	V2	Jap	Pakistan	PRJNA795890	T	Ref	Ref	Ref	1.2kb	Ref	Ref	del	Ref	Alt	Ref	Ref	A	WT
IRIS-12038	MUOY KUM	11.1933	105.892	V12	Ind	Cambodia	PRJNA795890	T	Ref	Ref	Ref	0.95kb	Ref	1_2	del	Ref	Alt	Ref	Ref	het	WT
IRIS-9769	MURASAHITSUTSURI	#N/A	#N/A	V2	Jap	Japan	PRJNA795890	P	Ref	Ref	Ref	1.2kb	Ref	Ref	del	Ref	Alt	Ref	Ref	A	WT
3K134	MURUNGA	6.84639	80.0319	V8	Ind	Sri Lanka	PRJNA795890	T	Ref	2	Ref	WT	Ref	Ref	Rc	Ref	Alt	Ref	Ref	T	WT
IRIS-11029	MUSHKAN 340 A	30.3958	69.3625	V9	Aus	Pakistan	PRJNA795890	T	Ref	1	Ref	WT	Ref	Ref	Rc	Ref	Alt	qSH3	Ref	C	T13
IRIS-9072	MUTA GANJE	23.6117	90.3397	V8	Ind	Bangladesh	PRJNA795890	T	Ref	Ref	Ref	WT	Ref	1_2	del	Ref	Alt	Ref	Ref	T	WT
UL037	Muteka	#N/A	#N/A	V2	Jap	Taiwan	PRJNA485658	indigenous	2	Ref	Ref	1.2kb	Ref	Ref	het	Ref	Alt	Ref	Ref	A	T19
3K001	MUTTU SAMBA	7.14889	81.5003	V8	Ind	Sri Lanka	PRJNA795890	T	Ref	Ref	Ref	0.95kb	Ref	Ref	Rc	Ref	Alt	Ref	Ref	T	WT
UL043	Nabohai	#N/A	#N/A	V2	Jap	Taiwan	PRJNA485658	indigenous	2	Ref	Ref	1.2kb	Ref	Ref	del	Ref	Alt	Ref	Ref	A	T19
IRIS-8407	NACHIN ER 12	2.03028	109.642	V11	Ind	Malaysia	PRJNA795890	T	Ref	Ref	Ref	0.95kb	Ref	1_2	del	Ref	Alt	Ref	Ref	T	WT
UL086	Naguton	#N/A	#N/A	V5	Jap	Taiwan	PRJNA485658	indigenous	Ref	Ref	Ref	1.2kb	Ref	Ref	del	glutinous	Alt	Ref	Ref	A	WT
IRIS-11390	NAH MOI	16.8264	100.26	V12	Ind	Thailand	PRJNA795890	T	Ref	2	Ref	0.95kb	Ref	Ref	del	glutinous	Alt	Ref	Ref	T	WT
IRIS-11534	NAHNG KHAO BOW	7.61556	100.073	V11	Ind	Thailand	PRJNA795890	T	2	Ref	Ref	0.95kb	2	Ref	del	Ref	Alt	Ref	Ref	T	WT
IRIS-10650	NAHNG PRAYAH 132	7.51556	99.8028	V11	Ind	Thailand	PRJNA795890	T	Ref	3	Ref	WT	Ref	1_2	del	Ref	Alt	Ref	Ref	T	WT
UL085	Nakabo	#N/A	#N/A	V2	Jap	Taiwan	PRJNA485658	indigenous	2	Ref	Ref	1.2kb	Ref	Ref	del	het	Alt	Ref	Ref	A	T19
UL044	Nakairitsu	#N/A	#N/A	V4	Jap	Taiwan	PRJNA373799	indigenous	2	3	Ref	WT	Ref	Ref	del	Ref	Alt	Ref	Ref	A	WT
UL084	Nakara2	#N/A	#N/A	V5	Jap	Taiwan	PRJNA485658	indigenous	Ref	Ref	Ref	1.2kb	Ref	Ref	del	glutinous	Alt	Ref	Ref	A	WT
UL053	NakarofukarapaiS1	#N/A	#N/A	V4	admix	Taiwan	PRJNA485658	indigenous	Ref	Ref	Ref	0.95kb	Ref	1_2	del	het	Alt	Ref	Ref	het	WT
IRIS-11739	NAKPUI	#N/A	#N/A	V10	Jap	Ghana	PRJNA795890	T	Ref	3	Ref	WT	Ref	Ref	del	Ref	Alt	Ref	Ref	T	T13
IRIS-11441	NALA	11.3494	124.464	V10	Jap	Philippines	PRJNA795890	T	Ref	3	Ref	1.2kb	Ref	Ref	del	Ref	Alt	Ref	Ref	T	WT
IRIS-9809	NALUMOOLAI KARUPAN	9.65472	80.0642	V12	Ind	Sri Lanka	PRJNA795890	T	Ref	Ref	Ref	WT	Ref	Ref	del	Ref	Alt	Ref	Ref	T	WT
3K105	NAM ROO	18.7964	98.66	V4	Jap	Thailand	PRJNA795890	T	2	3	Ref	WT	Ref	Ref	del	Ref	Alt	Ref	Ref	T	WT
IRIS-8485	NAM SA-GUI 19	16	103	V12	Ind	Thailand	PRJNA795890	T	2	3	Ref	WT	Ref	Ref	del	Ref	Alt	Ref	Ref	T	WT
IRIS-9727	NAN TE HAO	#N/A	#N/A	V13	Ind	China	PRJNA795890	0	Ref	2	Ref	0.95kb	2	1_2	het	Ref	Alt	Ref	Ref	T	WT
IRIS-10970	NANG SAU DO	16.4728	106.661	V12	Ind	VietNam	PRJNA795890	T	Ref	Ref	Ref	WT	Ref	1_2	del	Ref	Alt	Ref	Ref	T	WT
UL224	NANTON53	#N/A	#N/A	V1	Jap	Taiwan	PRJNA485658	indigenous	2	3	Ref	WT	Ref	Ref	Rc	Ref	Alt	Ref	Ref	T	T13
LR195	Nan-Tzu-Shien	#N/A	#N/A	V6	Ind	Taiwan	PRJNA485658	Ming ching	Ref	Ref	Ref	0.95kb	Ref	1_2	del	Ref	Alt	Ref	Ref	T	T7
UL054	Napatsupai	#N/A	#N/A	V6	Ind	Taiwan	PRJNA485658	indigenous	2	2	Ref	0.95kb	Ref	1_2	del	Ref	Alt	Ref	Ref	T	WT
UL063	NapatsupaiS3	#N/A	#N/A	V6	Ind	Taiwan	PRJNA485658	indigenous	Ref	Ref	Ref	0.95kb	Ref	1_2	del	Ref	Alt	Ref	Ref	A	WT
3K135	NAPDAI	24.77	93.8622	V8	Ind	India	PRJNA795890	T	Ref	2	Ref	0.95kb	Ref	Ref	del	Ref	Alt	Ref	Ref	T	T20
IRIS-11213	NARIKEL BADI	23.7786	90.3378	V9	Aus	Bangladesh	PRJNA795890	T	Ref	2	Ref	0.95kb	2	1_2	Rc	Ref	Alt	qSH3	Ref	C	T13
3K092	NARUN	0.70417	101.934	V11	Ind	Indonesia	PRJNA795890	T	2	3	Ref	WT	Ref	1_2	del	Ref	Alt	Ref	Ref	T	WT
UL039	Natara	#N/A	#N/A	V4	Jap	Taiwan	PRJNA485658	indigenous	2	Ref	Ref	1.2kb	Ref	Ref	del	Ref	Alt	Ref	Ref	A	WT
IRIS-11163	NATEL BORO	23.6117	90.3397	V9	Aus	Bangladesh	PRJNA795890	T	Ref	2	Ref	WT	Ref	Ref	Rc	Ref	Alt	qSH3	Ref	C	T13
IRIS-11031	NAWAN SATHRA BAGAR 344	30.3958	69.3625	V9	Aus	Pakistan	PRJNA795890	T	Ref	Ref	Ref	WT	Ref	Ref	Rc	Ref	Alt	het	Ref	C	T13
3K136	NCS102	25.8797	85.8039	V8	Ind	India	PRJNA795890	T	Ref	Ref	Ref	0.95kb	Ref	1_2	del	Ref	Alt	Ref	Ref	C	WT
IRIS-9605	NCS194	27.1425	80.8575	V13	Ind	India	PRJNA795890	T	Ref	Ref	Ref	0.95kb	2	1_2	del	Ref	Alt	Ref	Ref	T	T3
3K076	NCS809 A	21.1278	82.8006	V8	Ind	India	PRJNA795890	0	Ref	Ref	Ref	0.95kb	Ref	1_2	del	Ref	Alt	Ref	Ref	T	WT
3K013	NCS840	21.1278	82.8006	V8	Ind	India	PRJNA795890	0	Ref	2	Ref	0.95kb	Ref	Ref	Rc	Ref	Alt	Ref	Ref	T	WT
IRIS-12039	NEANG AN	12.9222	103.123	V12	Ind	Cambodia	PRJNA795890	T	Ref	3	Ref	WT	Ref	1_2	del	Ref	Alt	Ref	Ref	T	WT
IRIS-12096	NEANG CHEK	11.3186	105.048	V12	Ind	Cambodia	PRJNA795890	T	Ref	Ref	Ref	WT	Ref	1_2	del	Ref	Alt	Ref	Ref	T	WT
IRIS-12040	NEANG LAU	11.8497	106.116	V12	Ind	Cambodia	PRJNA795890	T	Ref	Ref	Ref	WT	Ref	1_2	del	Ref	Alt	Ref	Ref	T	WT
IRIS-10910	NEANG MAC	11.5761	104.284	V12	Ind	Cambodia	PRJNA795890	T	Ref	3	Ref	WT	Ref	1_2	del	Ref	Alt	Ref	Ref	T	WT
IRIS-12097	NEANG MINH	13.1	103.2	V12	Ind	Cambodia	PRJNA795890	T	Ref	Ref	Ref	0.95kb	Ref	1_2	Rc	Ref	Alt	Ref	Ref	T	WT
IRIS-11936	NEANG MINH TONN	12.3008	104.983	V12	Ind	Cambodia	PRJNA795890	T	Ref	3	Ref	WT	Ref	1_2	del	Ref	Alt	Ref	Ref	T	WT
IRIS-10912	NEANG SAATH K 45	13.1	103.2	V12	Ind	Cambodia	PRJNA795890	T	Ref	Ref	Ref	WT	Ref	1_2	del	Ref	Alt	Ref	Ref	T	WT
IRIS-8713	NELI	0.56667	97.75	V11	Ind	Indonesia	PRJNA795890	T	Ref	Ref	Ref	WT	Ref	1_2	del	Ref	Alt	Ref	Ref	T	WT
IRIS-10755	NEP BA BONG TO	16.4728	106.661	V12	Ind	VietNam	PRJNA795890	T	2	3	Ref	WT	Ref	1_2	del	glutinous	Alt	Ref	Ref	T	WT
IRIS-8536	NG KARAN DE	0.86361	109.894	V11	Ind	Indonesia	PRJNA795890	T	Ref	3	Ref	WT	Ref	1_2	del	Ref	Alt	Ref	Ref	T	T13
IRIS-10683	Ngan tia	16.2667	105.267	V12	Ind	Laos	PRJNA795890	T	Ref	2	Ref	0.95kb	Ref	1_2	del	glutinous	Alt	Ref	Ref	T	WT
IRIS-12288	NGWE-TOE-KYE	12.4294	98.6075	V12	Ind	Myanmar	PRJNA795890	T	2	Ref	Ref	0.95kb	Ref	1_2	del	Ref	Alt	Ref	Ref	T	WT
LR124	NIAO YAO	#N/A	#N/A	V6	Ind	Taiwan	PRJNA485658	Ming ching	2	Ref	Ref	0.95kb	Ref	1_2	del	Ref	Alt	Ref	Ref	T	WT
3K040	NIAW DAM	17.0056	99.8264	V12	Ind	Thailand	PRJNA795890	T	Ref	Ref	Ref	0.95kb	Ref	Ref	del	glutinous	Alt	Ref	Ref	T	WT
3K137	NIAW KHAMIN	13.0394	101.492	V10	Jap	Thailand	PRJNA795890	T	Ref	3	Ref	WT	Ref	Ref	del	glutinous	Alt	Ref	Ref	T	T13
IRIS-11683	NIAW KHIAW NGOO	17.0056	99.8264	V12	Ind	Thailand	PRJNA795890	T	Ref	3	Ref	WT	Ref	1_2	del	Ref	Alt	Ref	Ref	T	WT
IRIS-11840	NIAW NAHK KRAD	6.53972	101.281	V11	Ind	Thailand	PRJNA795890	T	Ref	3	Ref	WT	2	1_2	del	glutinous	Alt	Ref	Ref	T	WT
IRIS-11841	NIAW NARAI	14.2119	101.202	V12	Ind	Thailand	PRJNA795890	T	Ref	3	Ref	0.95kb	Ref	Ref	del	glutinous	Alt	Ref	Ref	T	WT
IRIS-11842	NIAW YUANG KHANUN	6.42889	101.824	V11	Ind	Thailand	PRJNA795890	T	Ref	3	Ref	WT	2	1_2	del	het	Alt	Ref	Ref	T	WT
IRIS-8731	NIBARI	23.9833	80.3333	V8	Ind	India	PRJNA795890	T	Ref	Ref	Ref	0.95kb	Ref	Ref	del	Ref	Alt	Ref	Ref	T	T20
CX140	Nipponbare	#N/A	#N/A	V2	Jap	Japan	PRJNA795890	I	Ref	Ref	Ref	1.2kb	Ref	Ref	del	Ref	Ref	Ref	Ref	A	WT
JJCx82	Nipponbare	#N/A	#N/A	V2	Jap	Japan	PRJNA795890	Modern variety	2	Ref	Ref	1.2kb	Ref	Ref	del	Ref	Ref	Ref	Ref	A	WT
Nipponbare	Nipponbare	#N/A	#N/A	V2	Jap	Japan	SRP003189	Modern variety	2	Ref	Ref	WT	Ref	Ref	del	Ref	Ref	Ref	Ref	A	WT
TWR1	Nivara	24.88	121.29	V3	Wild	Taiwan	PRJNA485658	wild	Ref	Ref	Ref	WT	Ref	Ref	Rc	Ref	Alt	qSH3	SH4	A	WT
TWR72	Nivara	24.88	121.29	V3	Wild	Taiwan	PRJNA485658	wild	Ref	Ref	Ref	1.2kb	Ref	Ref	Rc	Ref	Alt	qSH3	SH4	A	WT
UL050	Nobohai	#N/A	#N/A	V6	Ind	Taiwan	PRJNA485658	indigenous	Ref	2	Ref	0.95kb	2	1_2	del	Ref	Alt	Ref	Ref	T	WT
IRIS-10798	NOGO-BELE 2	-7.37333	131.506	V10	Jap	Indonesia	PRJNA795890	T	2	2	Ref	1.2kb	Ref	Ref	del	Ref	Alt	Ref	Ref	T	T13
JAP015	Nohrin 10	#N/A	#N/A	V2	Jap	Japan	PRJNA795890	Modern variety	Ref	Ref	Ref	1.2kb	Ref	Ref	del	Ref	Alt	Ref	Ref	A	WT
JAP016	Nohrin 14	#N/A	#N/A	V2	Jap	Japan	PRJNA795890	Modern variety	Ref	Ref	Ref	1.2kb	Ref	Ref	del	Ref	Alt	Ref	Ref	A	T19
JAP017	Nohrin 51	#N/A	#N/A	V2	Jap	Japan	PRJNA795890	Modern variety	Ref	Ref	Ref	1.2kb	Ref	Ref	del	Ref	Alt	Ref	Ref	A	WT
IRIS-11973	NOINJO	35.6667	128.867	V2	Jap	South Korea	PRJNA795890	T	Ref	Ref	Ref	1.2kb	Ref	Ref	del	Ref	Alt	Ref	Ref	A	WT
IRIS-8733	NOLOS	24.5	89.0833	V12	Ind	Bangladesh	PRJNA795890	T	Ref	2	Ref	0.95kb	Ref	Ref	Rc	Ref	Alt	Ref	Ref	T	WT
IRIS-9995	NONGLIMNA 1	#N/A	#N/A	V5	Jap	South Korea	PRJNA795890	I	Ref	Ref	Ref	1.2kb	Ref	Ref	del	het	Alt	Ref	Ref	T	WT
CX285	Nonglinnuo	#N/A	#N/A	V5	Jap	China	PRJNA795890	P	Ref	Ref	Ref	1.2kb	Ref	Ref	del	glutinous	Alt	Ref	Ref	T	WT
IRIS-12224	NOON SOUNG	17	105	V12	Ind	Laos	PRJNA795890	T	Ref	2	Ref	0.95kb	Ref	Ref	del	glutinous	Alt	Ref	Ref	T	WT
IRIS-8864	NOROI	23.1667	89.6667	V9	Aus	Bangladesh	PRJNA795890	T	2	2	Ref	0.95kb	Ref	1_2	Rc	Ref	Alt	qSH3	Ref	C	T13
IRIS-12041	NOU	11.1933	105.892	V12	Ind	Cambodia	PRJNA795890	T	Ref	Ref	Ref	WT	Ref	1_2	del	Ref	Alt	Ref	Ref	T	WT
IRIS-10030	NS252	#N/A	#N/A	V8	Ind	Madagascar	PRJNA795890	0	2	Ref	Ref	0.95kb	Ref	1_2	del	Ref	Alt	Ref	Ref	C	WT
IRIS-11558	NULI	23.6117	90.3397	V8	Ind	Bangladesh	PRJNA795890	T	Ref	3	Ref	WT	Ref	1_2	del	Ref	Alt	Ref	Ref	T	WT
NY1336	Nungyu 1336	25.23	121.54	V2	Jap	Taiwan	PRJNA485658	breeding	Ref	Ref	Ref	1.2kb	Ref	Ref	del	Ref	Alt	Ref	Ref	A	T19
NY1792	Nungyu 1792	25.23	121.54	V6	Ind	Taiwan	PRJNA485658	breeding	Ref	Ref	Ref	WT	Ref	1_2	del	Ref	Alt	Ref	Ref	T	WT
NY1800	Nungyu 1800	25.23	121.54	V2	Jap	Taiwan	PRJNA485658	breeding	Ref	Ref	Ref	1.2kb	Ref	Ref	del	Ref	Alt	Ref	Ref	A	T19
NY1811	Nungyu 1811	25.23	121.54	V2	Jap	Taiwan	PRJNA485658	breeding	Ref	Ref	Ref	1.2kb	Ref	Ref	del	Ref	Alt	Ref	Ref	T	T19
NY2092	Nungyu 2092	25.23	121.54	V2	Jap	Taiwan	PRJNA485658	breeding	Ref	Ref	Ref	1.2kb	Ref	Ref	del	Ref	Alt	Ref	Ref	A	T19
NYW174	Nungyu Waxy 174	25.23	121.54	V2	Jap	Taiwan	PRJNA485658	breeding	Ref	Ref	Ref	1.2kb	Ref	Ref	del	Ref	Alt	Ref	Ref	A	T19
NYW35	Nungyu Waxy 35	25.23	121.54	V6	admix	Taiwan	PRJNA485658	breeding	Ref	Ref	Ref	WT	Ref	Ref	del	Ref	Alt	Ref	Ref	het	T13
NYW66	Nungyu Waxy 66	25.23	121.54	V2	Jap	Taiwan	PRJNA485658	breeding	Ref	Ref	Ref	1.2kb	Ref	Ref	del	het	Alt	Ref	Ref	A	WT
UL028	Nutsurikui	#N/A	#N/A	V1	Jap	Taiwan	PRJNA485658	indigenous	Ref	3	Ref	1.2kb	Ref	Ref	del	Ref	Alt	Ref	Ref	A	WT
IRIS-11786	NYA NOFF	#N/A	#N/A	V12	Ind	Gambia	PRJNA795890	T	Ref	3	Ref	WT	Ref	Ref	del	Ref	Alt	Ref	Ref	T	WT
IRIS-12340	Nyao	#N/A	#N/A	V4	Jap	Laos	PRJNA795890	T	2	3	2	1.2kb	Ref	Ref	del	glutinous	Alt	Ref	Ref	T	WT
IRIS-10628	O SATIVA	21.1278	82.8006	V8	Ind	India	PRJNA795890	T	2	Ref	Ref	WT	Ref	Ref	del	Ref	Alt	Ref	Ref	T	WT
IRIS-11684	OB CHUEY	17.0056	99.8264	V12	Ind	Thailand	PRJNA795890	T	Ref	3	Ref	WT	Ref	Ref	del	Ref	Alt	Ref	Ref	T	WT
barthii	Obarthii	#N/A	#N/A	V3	Wild	Africa	PRJNA30379	wild	Ref	Ref	Ref	large	Ref	Ref	Rc	Ref	Alt	qSH3	SH4	T	WT
LR106	OLoanChu	#N/A	#N/A	V13	Ind	Taiwan	PRJNA485658	Ming ching	Ref	2	Ref	0.95kb	Ref	Ref	del	glutinous	Alt	Ref	Ref	T	T13
3K227	ONOY	#N/A	#N/A	V10	Jap	Philippines	PRJNA795890	T	2	3	Ref	WT	Ref	Ref	del	Ref	Alt	Ref	Ref	A	T13
W0123	Orufipogon	#N/A	#N/A	V9	Wild	India	PRJEB2829	wild	Ref	2	Ref	WT	Ref	1_2	Rc	Ref	Alt	qSH3	SH4	T	WT
W0128	Orufipogon	#N/A	#N/A	V11	Wild	India	PRJEB2829	wild	Ref	Ref	Ref	large	2	1_2	Rc	Ref	Alt	qSH3	SH4	T	WT
W0141	Orufipogon	#N/A	#N/A	V3	Wild	India	PRJEB2829	wild	Ref	Ref	Ref	WT	Ref	Ref	Rc	Ref	Alt	qSH3	SH4	T	WT
W0170	Orufipogon	#N/A	#N/A	V3	Wild	Thailand	PRJEB2829	wild	Ref	2	Ref	WT	Ref	1_2	Rc	Ref	Alt	qSH3	SH4	T	WT
W1687	Orufipogon	#N/A	#N/A	V8	Wild	India	PRJEB2829	wild	Ref	2	Ref	WT	Ref	1_2	Rc	Ref	Alt	qSH3	SH4	A	WT
W1698	Orufipogon	#N/A	#N/A	V3	Wild	Thailand	PRJEB2829	wild	Ref	2	1	WT	Ref	1_2	Rc	Ref	Alt	qSH3	SH4	T	WT
W1718	Orufipogon	#N/A	#N/A	V13	Wild	China	PRJNA674962	wild	Ref	2	Ref	WT	Ref	Ref	Rc	Ref	Alt	qSH3	SH4	T	T7
W1739	Orufipogon	#N/A	#N/A	V3	Wild	India	PRJEB2829	wild	Ref	Ref	Ref	WT	Ref	Ref	Rc	Ref	Alt	qSH3	SH4	T	WT
W1754	Orufipogon	#N/A	#N/A	V9	Wild	India	PRJEB2829	wild	Ref	2	Ref	WT	Ref	1_2	Rc	Ref	Alt	qSH3	SH4	C	WT
W1777	Orufipogon	#N/A	#N/A	V3	Wild	India	PRJEB2829	wild	Ref	Ref	Ref	WT	Ref	1_2	Rc	Ref	Alt	qSH3	SH4	T	WT
W1943	Orufipogon	#N/A	#N/A	V3	Wild	China	PRJEB2829	wild	Ref	Ref	Ref	WT	Ref	Ref	Rc	Ref	Alt	qSH3	SH4	A	WT
W1944	Orufipogon	#N/A	#N/A	V8	Wild	China	PRJNA674962	wild	Ref	Ref	Ref	WT	Ref	1_2	Rc	Ref	Alt	qSH3	SH4	T	T7
W1979	Orufipogon	#N/A	#N/A	V3	Wild	Indonesia	PRJEB2829	wild	Ref	2	Ref	WT	Ref	Ref	Rc	Ref	Alt	qSH3	SH4	T	WT
W2012	Orufipogon	#N/A	#N/A	V3	Wild	India	PRJEB2829	wild	Ref	Ref	Ref	WT	Ref	Ref	Rc	Ref	Alt	qSH3	SH4	T	WT
W3078	Orufipogon	#N/A	#N/A	V3	Wild	China	PRJEB2829	wild	Ref	Ref	Ref	WT	Ref	Ref	Rc	Ref	Alt	qSH3	SH4	A	WT
W3095	Orufipogon	#N/A	#N/A	V3	Wild	China	PRJEB2829	wild	Ref	Ref	Ref	WT	Ref	Ref	Rc	Ref	Alt	qSH3	SH4	het	WT
W3105	Orufipogon	#N/A	#N/A	V9	Wild	India	PRJEB2829	wild	Ref	2	Ref	large	Ref	Ref	Rc	Ref	Alt	qSH3	SH4	C	T13
IRIS-10073	OWARI MOCHI	34.7839	134.375	V5	Jap	Japan	PRJNA795890	T	2	Ref	Ref	1.2kb	Ref	Ref	del	glutinous	Alt	Ref	Ref	T	WT
LR221	P 170	#N/A	#N/A	V14	Ind	Taiwan	PRJNA485658	indigenous	Ref	Ref	Ref	0.95kb	Ref	Ref	Rc	Ref	Alt	Ref	Ref	T	WT
IRIS-10458	P168	#N/A	#N/A	V14	Ind	China	PRJNA795890	P	Ref	Ref	Ref	0.95kb	Ref	Ref	Rc	Ref	Alt	Ref	Ref	T	WT
IRIS-10682	PA KHENG	16.1461	105.295	V12	Ind	Laos	PRJNA795890	T	Ref	2	Ref	0.95kb	Ref	1_2	del	glutinous	Alt	Ref	Ref	T	WT
IRIS-12305	Pa kheng khaw	16.3878	105.375	V12	Ind	Laos	PRJNA795890	T	Ref	2	Ref	0.95kb	Ref	1_2	del	glutinous	Alt	Ref	Ref	T	WT
IRIS-12225	Pa lat ngan	15.9006	105.921	V12	Ind	Laos	PRJNA795890	T	2	3	Ref	0.95kb	Ref	Ref	del	Ref	Alt	Ref	Ref	T	WT
IRIS-12161	Pa Pha-ea	12.1831	106.883	V12	Ind	Cambodia	PRJNA795890	T	2	Ref	Ref	WT	2	1_2	del	Ref	Alt	Ref	Ref	T	WT
IRIS-11554	PA RABICHINA	#N/A	#N/A	V11	Ind	Sierra Leone	PRJNA795890	T	Ref	Ref	Ref	WT	2	1_2	Rc	Ref	Alt	Ref	Ref	T	WT
3K023	PACHCHAIPERUMAL 2462-11	#N/A	#N/A	V8	Ind	Sri Lanka	PRJNA795890	I	Ref	Ref	Ref	0.95kb	Ref	Ref	Rc	Ref	Alt	Ref	Ref	T	WT
IRIS-10953	PADI ABUNG KUNING	-4.06639	103.866	V10	Jap	Indonesia	PRJNA795890	T	Ref	3	Ref	WT	Ref	Ref	del	Ref	Alt	Ref	Ref	T	T13
3K181	PADI ADONG DUMARAT	2.03028	109.642	V10	Jap	Malaysia	PRJNA795890	T	2	3	Ref	WT	Ref	Ref	del	Ref	Alt	Ref	Ref	T	T13
IRIS-11497	PADI ARA	-8.61667	117.416	V8	Ind	Indonesia	PRJNA795890	T	2	Ref	Ref	WT	Ref	Ref	del	Ref	Alt	Ref	Ref	T	WT
IRIS-10943	PADI BENOT	-0.6975	103.07	V11	Ind	Indonesia	PRJNA795890	T	Ref	3	Ref	WT	Ref	1_2	del	Ref	Alt	Ref	Ref	T	WT
3K138	PADI BURIH	1.77389	113.645	V10	Jap	Malaysia	PRJNA795890	T	2	2	Ref	WT	Ref	Ref	del	Ref	Alt	Ref	Ref	A	T13
3K182	PADI DARAWAL	5.08333	116.45	V10	Jap	Malaysia	PRJNA795890	T	Ref	3	Ref	WT	Ref	Ref	del	Ref	Alt	Ref	Ref	T	T13
IRIS-10954	PADI GRUNDUL 1	-3.88861	103.196	V11	Ind	Indonesia	PRJNA795890	T	Ref	Ref	Ref	0.95kb	Ref	1_2	del	Ref	Alt	Ref	Ref	T	T7
IRIS-12006	PADI HANGIR	2.03028	109.642	V10	Jap	Malaysia	PRJNA795890	T	Ref	3	Ref	WT	Ref	Ref	del	Ref	Alt	qSH3	Ref	T	T13
IRIS-11498	PADI HEDENG	-8.56278	116.636	V7	Jap	Indonesia	PRJNA795890	T	2	3	Ref	0.95kb	Ref	Ref	del	het	Alt	Ref	Ref	T	T13
IRIS-11312	PADI HITAM	0.86361	109.894	V11	Ind	Indonesia	PRJNA795890	T	2	Ref	Ref	0.95kb	Ref	1_2	del	Ref	Alt	Ref	Ref	T	WT
3K139	PADI JALAI BELA	2.47583	114.286	V10	Jap	Malaysia	PRJNA795890	T	Ref	3	Ref	WT	Ref	Ref	del	Ref	Alt	het	Ref	het	T13
IRIS-10687	PADI PULUT	-2.93861	129.883	V11	Ind	Malaysia	PRJNA795890	T	Ref	Ref	Ref	WT	Ref	1_2	del	Ref	Alt	Ref	Ref	T	WT
IRIS-10955	PADI PUYUH	-4.69	119.63	V11	Ind	Indonesia	PRJNA795890	T	2	5	Ref	0.95kb	Ref	1_2	del	Ref	Alt	Ref	Ref	T	T13
IRIS-11313	PADI RENDAH	-3.29472	104.142	V10	Jap	Indonesia	PRJNA795890	T	2	2	Ref	large	Ref	Ref	del	Ref	Alt	Ref	Ref	A	T13
IRIS-8865	PADI SEPAH	-0.35	116.4	V10	Jap	Indonesia	PRJNA795890	T	Ref	2	Ref	large	Ref	Ref	del	Ref	Alt	Ref	Ref	A	T13
3K210	PADI TIMBUN	2.03028	109.642	V11	Ind	Malaysia	PRJNA795890	T	2	3	Ref	WT	Ref	1_2	del	glutinous	Alt	Ref	Ref	T	WT
IRIS-11499	PADI UDANG	-8.8	117.783	V10	Jap	Indonesia	PRJNA795890	T	Ref	3	Ref	0.95kb	Ref	Ref	del	Ref	Alt	Ref	Ref	T	WT
IRIS-11819	PADINTHUMA	18.6836	96.6831	V12	Ind	Myanmar	PRJNA795890	T	Ref	3	Ref	WT	Ref	Ref	del	Ref	Alt	Ref	Ref	T	WT
IRIS-11003	PAE MEETO	-4	121.5	V10	Jap	Indonesia	PRJNA795890	T	2	3	Ref	WT	Ref	Ref	del	Ref	Alt	Ref	Ref	A	T13
IRIS-10799	PAE ONGGA	-3.95	122.5	V10	Jap	Indonesia	PRJNA795890	T	Ref	2	Ref	large	Ref	Ref	del	Ref	Alt	Ref	Ref	T	T13
IRIS-11004	PAE SANGGULA	-4	121.5	V10	Jap	Indonesia	PRJNA795890	T	2	3	Ref	1.2kb	Ref	Ref	Rc	Ref	Alt	Ref	Ref	T	T13
IRIS-11001	PAEDAI SOBUDI	-4	121.917	V10	Jap	Indonesia	PRJNA795890	T	2	3	Ref	WT	Ref	Ref	Rc	glutinous	Alt	Ref	Ref	A	T13
UL075	Paerizumochi	#N/A	#N/A	V13	Ind	Taiwan	PRJNA485658	indigenous	Ref	2	Ref	0.95kb	2	1_2	del	Ref	Alt	Ref	Ref	T	T7
UL081	Pagaitsuitaiyaru	#N/A	#N/A	V2	Jap	Taiwan	PRJNA485658	indigenous	Ref	Ref	Ref	1.2kb	Ref	Ref	del	glutinous	Alt	Ref	Ref	A	T19
UL233	PAGAIYAHAN	#N/A	#N/A	V8	Ind	Taiwan	PRJNA485658	indigenous	Ref	2	Ref	1.2kb	Ref	Ref	del	Ref	Alt	Ref	Ref	A	WT
3K085	PAH PIANG	#N/A	#N/A	V12	Ind	Thailand	PRJNA795890	0	Ref	2	Ref	0.95kb	Ref	Ref	del	glutinous	Alt	Ref	Ref	T	WT
IRIS-8474	PAH WEAN	19.15	99.5833	V12	Ind	Thailand	PRJNA795890	T	Ref	3	Ref	0.95kb	Ref	1	del	glutinous	Alt	Ref	Ref	T	WT
IRIS-9415	PAHK NOK GAEW	14.0478	101.373	V12	Ind	Thailand	PRJNA795890	T	Ref	Ref	Ref	WT	Ref	Ref	del	Ref	Alt	Ref	Ref	T	WT
3K110	PAI YI PING	35.86	104.166	V13	Ind	China	PRJNA795890	T	Ref	Ref	Ref	0.95kb	2	1_2	del	Ref	Alt	Ref	Ref	T	WT
LR016	Pai-Chan	#N/A	#N/A	V6	Ind	Taiwan	PRJNA485658	Ming ching	Ref	Ref	Ref	0.95kb	Ref	1_2	del	Ref	Alt	Ref	Ref	T	WT
LR164	PaiJihTungChan	#N/A	#N/A	V6	Ind	Taiwan	PRJNA623980	Ming ching	Ref	3	Ref	0.95kb	Ref	1_2	Rc	Ref	Alt	Ref	Ref	T	WT
LR167	PaiKoPuChan	#N/A	#N/A	V6	Ind	Taiwan	PRJNA623980	Ming ching	Ref	Ref	Ref	0.95kb	Ref	1_2	del	Ref	Alt	Ref	Ref	T	WT
LR101	Pai-Ko-Tsao-Tzu	#N/A	#N/A	V6	Ind	Taiwan	PRJNA485658	Ming ching	Ref	Ref	Ref	0.95kb	Ref	1_2	del	Ref	Alt	Ref	Ref	T	WT
LR196	Pai-Mi-Chin-Hou	#N/A	#N/A	V6	Ind	Taiwan	PRJNA485658	Ming ching	Ref	Ref	Ref	0.95kb	Ref	1_2	del	Ref	Alt	Ref	Ref	T	WT
LR003	Pai-Mi-Fen	#N/A	#N/A	V13	Ind	Taiwan	PRJNA485658	Ming ching	Ref	2	Ref	0.95kb	Ref	1_2	del	Ref	Alt	Ref	Ref	T	WT
UL033	Pairaur	#N/A	#N/A	V5	Jap	Taiwan	PRJNA485658	indigenous	Ref	Ref	Ref	1.2kb	Ref	Ref	del	Ref	Alt	Ref	Ref	T	WT
UL027	Pairauwar	#N/A	#N/A	V5	Jap	Taiwan	PRJNA485658	indigenous	Ref	Ref	Ref	1.2kb	Ref	Ref	del	Ref	Alt	Ref	Ref	het	WT
IRIS-11207	PAIRJAT	25.9	89.0333	V8	Ind	Bangladesh	PRJNA795890	T	Ref	2	Ref	0.95kb	Ref	1_2	Rc	Ref	Alt	Ref	Ref	T	WT
UL061	Pakaikauneku	#N/A	#N/A	V6	admix	Taiwan	PRJNA485658	indigenous	Ref	Ref	Ref	0.95kb	Ref	1_2	del	Ref	Alt	Ref	Ref	T	WT
UL124	PaKengKeng	22.15	120.81	V6	Ind	Taiwan	PRJNA485658	indigenous	Ref	3	Ref	0.95kb	Ref	1_2	Rc	Ref	Alt	Ref	Ref	T	WT
IRIS-11820	PAKISTANHMWE	18.6836	96.6831	V12	Ind	Myanmar	PRJNA795890	T	Ref	3	Ref	WT	Ref	1_2	del	Ref	Alt	Ref	Ref	T	WT
IRIS-10931	PAKWALAN	16.505	120.631	V10	Jap	Philippines	PRJNA795890	T	Ref	3	Ref	large	Ref	Ref	del	Ref	Alt	Ref	Ref	A	T13
IRIS-10800	PALOTAN MELATI	-7.49306	112.429	V7	Jap	Indonesia	PRJNA795890	T	2	3	Ref	WT	Ref	Ref	del	glutinous	Alt	Ref	Ref	T	T13
IRIS-11843	PAN DAWK MAHK	15.12	104.322	V12	Ind	Thailand	PRJNA795890	T	Ref	2	Ref	0.95kb	Ref	1_2	del	Ref	Alt	Ref	Ref	T	WT
IRIS-11603	PANDRI PAREWA	21.55	81.7833	V9	Aus	India	PRJNA795890	0	Ref	2	Ref	WT	Ref	Ref	Rc	Ref	Alt	qSH3	Ref	C	T13
IRIS-12226	PANG	20.6117	101.947	V4	Jap	Laos	PRJNA795890	T	2	3	2	1.2kb	Ref	Ref	del	Ref	Alt	Ref	Ref	T	T12
IRIS-10994	PANGETAN	17.1303	121.301	V7	Jap	Philippines	PRJNA795890	T	Ref	3	Ref	0.95kb	Ref	Ref	del	Ref	Alt	Ref	Ref	A	T13
3K035	PANIKELASH	#N/A	#N/A	V8	Ind	India	PRJNA795890	0	Ref	2	Ref	0.95kb	Ref	1_2	Rc	Ref	Alt	Ref	Ref	T	WT
3K012	PANNITHI	6.86417	81.0228	V7	Jap	Sri Lanka	PRJNA795890	T	Ref	2	Ref	large	Ref	Ref	Rc	Ref	Alt	Ref	Ref	T	T13
UL035	PAOTSUPAGAIAHON	#N/A	#N/A	V2	admix	Taiwan	PRJNA485658	indigenous	2	2	Ref	1.2kb	Ref	Ref	del	Ref	Alt	Ref	Ref	A	T19
UL031	Papito	#N/A	#N/A	V2	Jap	Taiwan	PRJNA485658	indigenous	Ref	Ref	Ref	WT	Ref	Ref	del	Ref	Alt	Ref	Ref	A	T19
UL051	Parahainakoru	#N/A	#N/A	V13	Ind	Taiwan	PRJNA485658	indigenous	Ref	2	Ref	0.95kb	Ref	Ref	del	het	Alt	Ref	Ref	T	WT
3K140	PARAY KINARABAW	12.8628	121.243	V10	Jap	Philippines	PRJNA795890	T	2	3	Ref	WT	Ref	Ref	Rc	Ref	Alt	Ref	Ref	T	T13
IRIS-10578	PARAY QIKUG KABAYUH	12.8628	121.243	V10	Jap	Philippines	PRJNA795890	T	Ref	3	Ref	large	Ref	Ref	Rc	Ref	Alt	Ref	Ref	T	T13
IRIS-10801	PARE BUWUN	-8.65278	117.361	V7	Jap	Indonesia	PRJNA795890	T	2	3	Ref	0.95kb	Ref	Ref	del	Ref	Alt	Ref	Ref	A	WT
IRIS-11971	PARE LAMBAN BINGKA	-3	119.75	V7	Jap	Indonesia	PRJNA795890	T	Ref	3	Ref	0.95kb	Ref	Ref	del	glutinous	Alt	Ref	Ref	A	WT
IRIS-8920	PATALASAFED SUNGHAWADO	23.9747	78.4211	V8	Ind	India	PRJNA795890	0	Ref	2	Ref	WT	Ref	Ref	del	Ref	Alt	Ref	Ref	T	WT
IRIS-11540	PATIE ROUGE	#N/A	#N/A	V10	Jap	Guinea	PRJNA795890	T	2	3	Ref	WT	Ref	Ref	del	Ref	Alt	Ref	Ref	T	T13
IRIS-8932	PATISAIL	24.9136	89.3358	V11	Ind	Bangladesh	PRJNA795890	T	Ref	Ref	Ref	WT	2	1_2	del	Ref	Alt	Ref	Ref	T	T7
IRIS-8632	PATMADHAI 1	26	89.3333	V8	Ind	Bangladesh	PRJNA795890	T	2	2	Ref	WT	Ref	1_2	Rc	Ref	Alt	Ref	Ref	T	WT
UL100	Patsupatsu	#N/A	#N/A	V2	Jap	Taiwan	PRJNA485658	indigenous	Ref	Ref	Ref	1.2kb	Ref	Ref	del	glutinous	Alt	Ref	Ref	A	T19
IRIS-11738	PAUNDRI	22.1833	79.9167	V8	Ind	India	PRJNA795890	T	2	2	Ref	WT	Ref	Ref	del	Ref	Alt	Ref	Ref	T	T20
IRIS-11508	PAWNG AEW 1	14.8472	102.99	V12	Ind	Thailand	PRJNA795890	T	Ref	3	Ref	WT	Ref	Ref	del	Ref	Alt	Ref	Ref	T	WT
UL083	Pazumataharu	#N/A	#N/A	V1	Jap	Taiwan	PRJNA485658	indigenous	2	3	Ref	1.2kb	Ref	Ref	del	glutinous	Alt	Ref	Ref	T	WT
UL040	Pazumatamaru	#N/A	#N/A	V2	Jap	Taiwan	PRJNA485658	indigenous	Ref	Ref	Ref	large	Ref	Ref	del	Ref	Alt	Ref	Ref	A	T13
IRGC8238	PEH-KUH	#N/A	#N/A	V13	Ind	Taiwan	PRJNA557122	Ming ching	Ref	2	Ref	0.95kb	Ref	Ref	del	Ref	Alt	Ref	Ref	T	T7
IRIS-11314	PELAU	0.86361	109.894	V10	Jap	Indonesia	PRJNA795890	T	Ref	3	Ref	WT	Ref	Ref	del	Ref	Alt	Ref	Ref	A	T13
IRIS-11315	PENDEK LAYUNG	-3.29472	104.142	V11	Ind	Indonesia	PRJNA795890	T	Ref	Ref	Ref	WT	Ref	1_2	del	Ref	Alt	Ref	Ref	T	T13
IRIS-10717	PERIYA VELLAI	9.65472	80.0642	V8	Ind	Sri Lanka	PRJNA795890	T	Ref	Ref	Ref	0.95kb	Ref	Ref	Rc	Ref	Alt	qSH3	Ref	T	WT
IRIS-10802	PEUTEUJ	-6.75	107.5	V7	Jap	Indonesia	PRJNA795890	T	2	Ref	Ref	large	Ref	Ref	del	Ref	Alt	Ref	Ref	A	WT
IRIS-11080	Phae meun lan	19.8833	102.133	V12	Ind	Laos	PRJNA795890	T	Ref	3	Ref	0.95kb	Ref	1_2	del	het	Alt	Ref	Ref	T	WT
IRIS-11079	Phan phae	18.2803	103.861	V12	Ind	Laos	PRJNA795890	T	Ref	3	Ref	WT	Ref	1_2	del	glutinous	Alt	Ref	Ref	T	WT
IRIS-10913	PHAT PRORMOL	11.5761	104.284	V12	Ind	Cambodia	PRJNA795890	T	Ref	Ref	Ref	WT	Ref	1_2	del	Ref	Alt	Ref	Ref	T	WT
IRIS-12042	PHCAR KABAS	12.0494	105.643	V12	Ind	Cambodia	PRJNA795890	T	Ref	Ref	Ref	WT	Ref	1_2	del	Ref	Alt	Ref	Ref	T	WT
IRIS-10915	PHCAR SLA KI	13.1	103.2	V12	Ind	Cambodia	PRJNA795890	T	Ref	Ref	Ref	WT	Ref	1_2	del	Ref	Alt	Ref	Ref	T	WT
3K183	PHIT CHZK	13.0394	101.492	V4	Jap	Thailand	PRJNA795890	T	2	3	Ref	1.2kb	Ref	Ref	del	glutinous	Alt	Ref	Ref	T	WT
IRIS-8436	PIKTO MAMAS	0.70417	101.934	V7	Jap	Indonesia	PRJNA795890	T	Ref	3	Ref	0.95kb	Ref	Ref	del	Ref	Alt	Ref	Ref	T	WT
3K141	PILIT TAPUL	13.6953	123.275	V10	Jap	Philippines	PRJNA795890	T	2	2	Ref	1.2kb	Ref	Ref	Rc	Ref	Alt	Ref	Ref	A	T13
LR224	PIN CHUAN B	#N/A	#N/A	V6	Ind	Taiwan	PRJNA485658	indigenous	Ref	Ref	Ref	0.95kb	Ref	Ref	Rc	Ref	Alt	Ref	Ref	T	WT
IRIS-10710	PINDE GOGO WIERIE	#N/A	#N/A	V10	Jap	Surinam	PRJNA795890	T	Ref	3	Ref	large	Ref	Ref	del	Ref	Alt	Ref	Ref	T	T13
IRIS-10919	PINIDWA QAN QIPUGO PINGKITAN	17.2	120.75	V7	Jap	Philippines	PRJNA795890	T	2	3	Ref	0.95kb	Ref	Ref	del	Ref	Alt	Ref	Ref	A	T13
IRIS-10920	PINIDWA QAN QIPUGO QELEK	17.2	120.75	V7	Jap	Philippines	PRJNA795890	T	2	3	Ref	0.95kb	Ref	Ref	del	Ref	Alt	Ref	Ref	A	T13
UL088	Pintowan1	#N/A	#N/A	V1	Jap	Taiwan	PRJNA485658	indigenous	Ref	3	3	1.2kb	Ref	Ref	del	glutinous	Alt	Ref	Ref	A	WT
IRIS-11995	PINUTYUKAN	12.3256	121.347	V10	Jap	Philippines	PRJNA795890	T	Ref	2	Ref	large	Ref	Ref	del	Ref	Alt	Ref	Ref	T	T13
IRIS-10803	PLAMPEYAN	-7.5	111	V7	Jap	Indonesia	PRJNA795890	T	Ref	3	Ref	0.95kb	Ref	Ref	del	Ref	Alt	Ref	Ref	A	T13
IRIS-11685	PLAWNG SAENG	15.2292	105.855	V12	Ind	Thailand	PRJNA795890	T	Ref	3	Ref	0.95kb	Ref	Ref	del	glutinous	Alt	Ref	Ref	T	WT
IRIS-8586	PLI KHAO	18.145	100.141	V12	Ind	Thailand	PRJNA795890	T	Ref	2	Ref	0.95kb	Ref	Ref	del	glutinous	Alt	Ref	Ref	T	WT
3K002	PODI HEENATI	6.58306	79.9667	V9	Aus	Sri Lanka	PRJNA795890	T	Ref	Ref	Ref	WT	Ref	1_2	Rc	Ref	Alt	Ref	Ref	C	WT
3K011	POKKALI	6.83194	81.0108	V8	Ind	Sri Lanka	PRJNA795890	T	Ref	Ref	Ref	0.95kb	Ref	Ref	Rc	Ref	Alt	Ref	Ref	T	WT
IRIS-11019	PORANG	23.6117	90.3397	V9	Aus	Bangladesh	PRJNA795890	T	Ref	2	Ref	WT	Ref	Ref	Rc	Ref	Alt	qSH3	Ref	T	T13
IRIS-11982	PORASHI	25.9458	89.3722	V9	Aus	Bangladesh	PRJNA795890	T	Ref	2	Ref	0.95kb	Ref	1_2	Rc	Ref	Alt	qSH3	Ref	C	T13
3K142	P-PEY SIQAT	6.55	122.15	V10	Jap	Philippines	PRJNA795890	T	2	3	Ref	WT	Ref	Ref	del	Ref	Alt	Ref	Ref	T	T13
IRIS-11509	PRADOO DAENG	13.0394	101.492	V12	Ind	Thailand	PRJNA795890	T	2	Ref	Ref	WT	Ref	1_2	del	Ref	Alt	Ref	Ref	T	WT
IRIS-10804	PUAK	-3.1225	115.905	V11	Ind	Indonesia	PRJNA795890	T	2	Ref	Ref	0.95kb	2	1_2	del	Ref	Alt	Ref	Ref	T	WT
IRIS-11958	PUANG MAHLAI KHAO	13.0394	101.492	V8	Ind	Thailand	PRJNA795890	T	Ref	3	Ref	WT	2	1_2	del	Ref	Alt	Ref	Ref	T	WT
IRIS-11844	PUEY TAW	13.5289	99.8142	V12	Ind	Thailand	PRJNA795890	T	2	Ref	Ref	0.95kb	Ref	Ref	del	Ref	Alt	Ref	Ref	T	WT
IRIS-8509	PUILLIPINA KATARI	25.6667	88.75	V8	Ind	Bangladesh	PRJNA795890	T	Ref	Ref	Ref	WT	Ref	Ref	del	Ref	Alt	Ref	Ref	T	WT
IRIS-10805	PULO	1.24972	124.833	V7	Jap	Indonesia	PRJNA795890	T	Ref	3	Ref	0.95kb	Ref	Ref	del	glutinous	Alt	Ref	Ref	A	T13
IRIS-11005	PULU LOTONG	-4.66667	120.05	V7	Jap	Indonesia	PRJNA795890	T	Ref	3	Ref	0.95kb	Ref	1_2	het	glutinous	Alt	Ref	Ref	T	T13
IRIS-11006	PULU RENNI	-4.66667	120.05	V12	Ind	Indonesia	PRJNA795890	T	2	Ref	Ref	0.95kb	2	1_2	del	Ref	Alt	Ref	Ref	T	WT
IRIS-11810	PULURE	#N/A	#N/A	V12	Ind	Kenya	PRJNA795890	T	Ref	3	Ref	WT	Ref	1_2	Rc	Ref	Alt	Ref	Ref	T	WT
IRIS-8725	PULUT BARAYA	-0.83333	119.667	V11	Ind	Indonesia	PRJNA795890	T	Ref	Ref	Ref	WT	2	1_2	del	glutinous	Alt	Ref	Ref	T	WT
IRIS-11007	PULUT BONGO	0.78528	123.867	V7	Jap	Indonesia	PRJNA795890	T	2	3	Ref	0.95kb	Ref	Ref	del	glutinous	Alt	Ref	Ref	A	T13
3K038	PULUT BURUNG	4.64806	115.672	V11	Ind	Malaysia	PRJNA795890	T	Ref	3	Ref	WT	Ref	1_2	del	Ref	Alt	Ref	Ref	T	WT
IRIS-11008	PULUT CENRANA	-4.25	120.167	V7	Jap	Indonesia	PRJNA795890	T	2	3	Ref	WT	Ref	1_2	het	glutinous	Alt	Ref	Ref	T	T13
IRIS-11009	PULUT HALAPA	1.24972	124.833	V10	Jap	Indonesia	PRJNA795890	T	Ref	3	Ref	WT	Ref	Ref	Rc	glutinous	Alt	Ref	Ref	T	T13
IRIS-12068	PULUT KETAN	0.5	112	V10	Jap	Indonesia	PRJNA795890	T	2	3	Ref	large	Ref	Ref	del	glutinous	Alt	qSH3	Ref	A	WT
IRIS-12069	PULUT MAS	0.16667	111.5	V10	Jap	Indonesia	PRJNA795890	T	2	3	Ref	WT	Ref	Ref	del	glutinous	Alt	Ref	Ref	A	T13
IRIS-12240	PULUT MINYAK	#N/A	#N/A	V11	Ind	Indonesia	PRJNA795890	0	2	3	Ref	WT	Ref	1_2	del	Ref	Alt	Ref	Ref	T	WT
3K184	PULUT SELEMYAM	2.03028	109.642	V11	Ind	Malaysia	PRJNA795890	T	Ref	3	Ref	0.95kb	Ref	1_2	del	glutinous	Alt	Ref	Ref	T	WT
IRIS-10937	PULUT WAJIT	-1.75833	102.806	V11	Ind	Indonesia	PRJNA795890	T	Ref	Ref	Ref	0.95kb	Ref	1_2	del	glutinous	Alt	Ref	Ref	T	WT
IRIS-9375	PULUTAN	5.61667	117.117	V10	Jap	Malaysia	PRJNA795890	T	Ref	3	Ref	WT	Ref	Ref	Rc	Ref	Alt	Ref	Ref	T	T13
IRIS-9271	PURA BINNI	24.5	90.3333	V8	Ind	Bangladesh	PRJNA795890	T	Ref	Ref	Ref	WT	Ref	1_2	del	Ref	Alt	Ref	Ref	T	WT
UL021	Purahaitairin	#N/A	#N/A	V2	Jap	Taiwan	PRJNA485658	indigenous	Ref	Ref	Ref	1.2kb	Ref	Ref	del	Ref	Alt	Ref	Ref	A	WT
IRIS-8381	PURAK SIRIBA	#N/A	#N/A	V10	Jap	Malaysia	PRJNA795890	T	Ref	2	Ref	large	Ref	Ref	del	Ref	Alt	Ref	Ref	T	T13
IRIS-11343	PURTOK	17.98	120.66	V12	Ind	Philippines	PRJNA795890	T	Ref	3	Ref	0.95kb	Ref	Ref	del	glutinous	Alt	Ref	Ref	T	WT
IRIS-9310	PUTEH KACA	4.08333	96.25	V11	Ind	Indonesia	PRJNA795890	T	Ref	Ref	Ref	0.95kb	Ref	1_2	del	Ref	Alt	Ref	Ref	T	WT
3K166	PUTUS TOLO	1.83278	98.7569	V7	Jap	Indonesia	PRJNA795890	T	2	3	Ref	0.95kb	Ref	Ref	del	glutinous	Alt	Ref	Ref	A	T13
3K143	QI GU	23.7489	108.302	V13	Ind	China	PRJNA795890	T	Ref	2	Ref	0.95kb	2	Ref	Rc	Ref	Alt	Ref	Ref	T	T7
3K185	QINOGNAS	17.1139	120.931	V10	Jap	Philippines	PRJNA795890	T	Ref	3	Ref	WT	Ref	Ref	Rc	Ref	Alt	Ref	Ref	A	T13
IRIS-11686	QUAHNG LUANG	13.0394	101.492	V12	Ind	Thailand	PRJNA795890	T	Ref	3	Ref	0.95kb	Ref	Ref	del	glutinous	Alt	Ref	Ref	T	WT
IRIS-9970	RACE PERUMAL	8.56833	81.0789	V8	Ind	Sri Lanka	PRJNA795890	T	Ref	Ref	Ref	0.95kb	Ref	Ref	Rc	Ref	Alt	Ref	Ref	T	WT
IRIS-10806	RADEN DJAWA	-3.1225	115.905	V11	Ind	Indonesia	PRJNA795890	T	Ref	3	Ref	WT	2	1_2	del	Ref	Alt	Ref	Ref	T	WT
IRIS-8956	RADEN KARAMUNTING	-2.69056	119.026	V11	Ind	Indonesia	PRJNA795890	T	Ref	Ref	Ref	WT	Ref	1_2	del	Ref	Alt	Ref	Ref	T	WT
IRIS-10701	RADIN EBOS 35	2.03028	109.642	V11	Ind	Malaysia	PRJNA795890	T	Ref	Ref	Ref	WT	2	1_2	del	Ref	Alt	Ref	Ref	T	WT
IRIS-10698	RADIN GOI	2.03028	109.642	V11	Ind	Malaysia	PRJNA795890	T	Ref	Ref	Ref	WT	2	1_2	del	Ref	Alt	Ref	Ref	T	WT
UL058	Ragarasu	#N/A	#N/A	V6	Ind	Taiwan	PRJNA485658	indigenous	Ref	Ref	Ref	0.95kb	Ref	1_2	del	glutinous	Alt	Ref	Ref	T	WT
UL026	Ragasu	#N/A	#N/A	V1	Jap	Taiwan	PRJNA485658	indigenous	Ref	3	Ref	1.2kb	Ref	Ref	del	Ref	Alt	Ref	Ref	T	WT
IRIS-11711	RAI MAHK MEUANG	7.105	100.527	V12	Ind	Thailand	PRJNA795890	T	Ref	3	Ref	WT	Ref	Ref	del	glutinous	Alt	Ref	Ref	T	WT
IRIS-11672	RAI MANULA	30.02	81.8931	V2	Jap	Nepal	PRJNA795890	T	2	Ref	Ref	1.2kb	Ref	Ref	del	Ref	Alt	Ref	Ref	A	T19
IRIS-11485	RAMINAD	16.4831	121.15	V12	Ind	Philippines	PRJNA795890	T	Ref	Ref	Ref	WT	Ref	Ref	del	Ref	Alt	Ref	Ref	T	WT
IRIS-10807	RANDA KUNING	1.71278	116.739	V11	Ind	Indonesia	PRJNA795890	T	2	Ref	Ref	WT	2	1_2	del	Ref	Alt	Ref	Ref	T	WT
3K093	RANDAH SASAK	-0.42417	100.847	V11	Ind	Indonesia	PRJNA795890	T	2	2	Ref	0.95kb	Ref	1_2	del	Ref	Alt	Ref	Ref	T	T13
3K186	RANGKAI KEPEL	-3.29472	104.142	V10	Jap	Indonesia	PRJNA795890	T	2	3	Ref	WT	Ref	Ref	del	Ref	Alt	Ref	Ref	A	T13
IRIS-9832	RANGOON SAMBA	7.7	81.7	V8	Ind	Sri Lanka	PRJNA795890	T	2	Ref	Ref	0.95kb	2	Ref	del	Ref	Alt	Ref	Ref	T	WT
IRIS-11191	RANRUWAN	6.05	80.2167	V9	Aus	Sri Lanka	PRJNA795890	T	Ref	6	Ref	WT	Ref	1_2	Rc	Ref	Alt	Ref	Ref	C	WT
IRIS-11316	RANTAT	0.86361	109.894	V11	Ind	Indonesia	PRJNA795890	T	Ref	Ref	Ref	0.95kb	Ref	1_2	del	Ref	Alt	Ref	Ref	T	WT
IRIS-10808	RANTE	-6.96889	110.124	V7	Jap	Indonesia	PRJNA795890	T	2	3	Ref	0.95kb	Ref	Ref	del	Ref	Alt	Ref	Ref	A	T13
IRIS-8812	RELLY	-8.2	114.367	V11	Ind	Indonesia	PRJNA795890	T	Ref	Ref	Ref	0.95kb	Ref	1_2	del	Ref	Alt	Ref	Ref	T	T7
IRIS-8744	REMOL	-6.75	107.5	V11	Ind	Indonesia	PRJNA795890	T	Ref	Ref	Ref	0.95kb	Ref	1_2	del	Ref	Alt	Ref	Ref	T	T7
3K187	RENIK BELITI	-3.29472	104.142	V10	Jap	Indonesia	PRJNA795890	T	2	3	Ref	WT	Ref	Ref	del	Ref	Alt	Ref	Ref	A	T13
IRIS-10074	RIKU AIKOKU	34.7839	134.375	V5	Jap	Japan	PRJNA795890	T	2	Ref	Ref	1.2kb	Ref	Ref	del	Ref	Alt	Ref	Ref	T	WT
IRIS-9239	RIMBUN	-2.63111	115.353	V10	Jap	Indonesia	PRJNA795890	T	Ref	3	Ref	WT	Ref	Ref	del	Ref	Alt	Ref	Ref	A	T13
IRIS-9740	ROJOFOTSY	#N/A	#N/A	V8	Ind	Madagascar	PRJNA795890	T	2	Ref	Ref	WT	Ref	Ref	Rc	Ref	Alt	Ref	Ref	C	T13
3K188	ROJONNY NTAOLO	#N/A	#N/A	V8	Ind	Madagascar	PRJNA795890	T	Ref	Ref	Ref	WT	Ref	Ref	del	Ref	Alt	Ref	Ref	C	WT
IRIS-8704	ROPA	26.3333	78.75	V8	Ind	India	PRJNA795890	T	Ref	3	Ref	WT	Ref	Ref	del	Ref	Alt	Ref	Ref	T	WT
UL103	RuiYan	#N/A	#N/A	V1	Jap	Taiwan	PRJNA373799	indigenous	Ref	3	Ref	1.2kb	Ref	Ref	Rc	glutinous	Alt	Ref	Ref	T	WT
IRIS-11178	RUJAK DANAN	-1.22333	100.448	V11	Ind	Indonesia	PRJNA795890	T	Ref	Ref	Ref	WT	Ref	1_2	del	Ref	Alt	Ref	Ref	T	T13
IRIS-11687	SA GAE	16.0139	101.889	V12	Ind	Thailand	PRJNA795890	T	Ref	3	Ref	WT	Ref	1_2	del	Ref	Alt	Ref	Ref	T	WT
IRIS-11392	SA MER	17.0056	99.8264	V12	Ind	Thailand	PRJNA795890	T	Ref	3	Ref	WT	Ref	1_2	del	Ref	Alt	Ref	Ref	T	WT
IRIS-12296	SABALINE	13.6628	98.4342	V12	Ind	Myanmar	PRJNA795890	T	2	2	Ref	WT	Ref	1_2	del	Ref	Alt	Ref	Ref	T	WT
3K144	SABORAMANDALOAFO	#N/A	#N/A	V8	Ind	Madagascar	PRJNA795890	T	2	3	Ref	WT	Ref	Ref	del	Ref	Alt	Ref	Ref	T	WT
IRIS-11162	SABRAN	-7.99333	110.585	V8	Ind	Indonesia	PRJNA795890	T	Ref	3	Ref	WT	2	1_2	del	Ref	Alt	Ref	Ref	T	T7
IRIS-9325	SADA RUPA	23	90.8333	V8	Ind	Bangladesh	PRJNA795890	T	Ref	Ref	Ref	WT	Ref	1_2	del	Ref	Alt	Ref	Ref	T	T13
IRIS-9582	SADOK	2.55722	113.001	V11	Ind	Malaysia	PRJNA795890	T	Ref	3	Ref	WT	Ref	1_2	del	Ref	Alt	Ref	Ref	T	WT
IRIS-10964	SADUMONI	23.25	89.3333	V9	Aus	Bangladesh	PRJNA795890	T	Ref	2	Ref	0.95kb	Ref	Ref	Rc	Ref	Alt	qSH3	Ref	C	T13
IRIS-11387	SAHM RUANG NAK	13.0394	101.492	V12	Ind	Thailand	PRJNA795890	T	Ref	Ref	Ref	WT	Ref	1_2	del	Ref	Alt	Ref	Ref	T	WT
IRIS-9470	SAHULO FACHE SOYO	1.25	97.6	V10	Jap	Indonesia	PRJNA795890	T	Ref	2	Ref	WT	Ref	Ref	Rc	Ref	Alt	Ref	Ref	T	T13
IRIS-11111	SAITA	23.6117	90.3397	V9	Aus	Bangladesh	PRJNA795890	T	Ref	2	Ref	WT	Ref	Ref	Rc	Ref	Alt	Ref	Ref	het	T13
IRIS-11436	SAKAZELE	#N/A	#N/A	V10	Jap	Cote dIvoire	PRJNA795890	T	2	3	Ref	WT	Ref	Ref	del	Ref	Alt	Ref	Ref	T	T13
IRIS-11462	SALSI	15.1664	73.9925	V9	Aus	India	PRJNA795890	T	Ref	1	Ref	WT	Ref	Ref	Rc	Ref	Alt	qSH3	Ref	het	T13
IRIS-12308	SAM SI	15.9008	105.921	V12	Ind	Laos	PRJNA795890	T	Ref	3	Ref	0.95kb	Ref	Ref	del	glutinous	Alt	Ref	Ref	T	WT
3K145	SAMBA	6.98306	81.0333	V8	Ind	Sri Lanka	PRJNA795890	T	Ref	2	Ref	0.95kb	Ref	Ref	Rc	Ref	Alt	Ref	Ref	C	WT
IRIS-12043	SAMBOK ANGKRANG	10.7886	104.322	V12	Ind	Cambodia	PRJNA795890	T	Ref	Ref	Ref	WT	Ref	1_2	del	Ref	Alt	Ref	Ref	T	WT
IRIS-11344	SAMON	15.9906	120.442	V12	Ind	Philippines	PRJNA795890	T	Ref	3	Ref	WT	Ref	1_2	Rc	Ref	Alt	Ref	Ref	T	WT
IRIS-10809	SAMPANG KUNING	-6.96889	110.124	V7	Jap	Indonesia	PRJNA795890	T	Ref	3	Ref	0.95kb	Ref	1_2	del	Ref	Alt	Ref	Ref	T	T13
IRIS-12101	SAMRONG 2	13.1	103.2	V12	Ind	Cambodia	PRJNA795890	T	Ref	Ref	Ref	WT	Ref	1_2	del	Ref	Alt	Ref	Ref	T	WT
IRIS-11953	SAN BAO GU	35.86	104.166	V13	Ind	China	PRJNA795890	0	Ref	2	Ref	0.95kb	Ref	1_2	Rc	Ref	Alt	Ref	Ref	T	T7
IRIS-10075	SANGOKU	34.7839	134.375	V5	Jap	Japan	PRJNA795890	T	Ref	Ref	Ref	large	Ref	Ref	del	Ref	Alt	Ref	Ref	T	WT
IRIS-12309	Sanpatong nyay	16.8094	105.344	V12	Ind	Laos	PRJNA795890	T	2	3	Ref	0.95kb	Ref	Ref	del	glutinous	Alt	Ref	Ref	T	WT
IRIS-11034	SANTHI 206	30.3958	69.3625	V9	Aus	Pakistan	PRJNA795890	0	Ref	Ref	Ref	WT	Ref	1_2	Rc	Ref	Alt	qSH3	Ref	C	T13
IRIS-12044	SAR SIEM	11.3644	105.457	V12	Ind	Cambodia	PRJNA795890	T	Ref	Ref	Ref	WT	Ref	1_2	del	Ref	Alt	Ref	Ref	T	WT
IRIS-8457	SARA	4.08333	96.3667	V11	Ind	Indonesia	PRJNA795890	T	Ref	Ref	Ref	0.95kb	Ref	1_2	del	Ref	Alt	Ref	Ref	T	WT
IRIS-12083	SARIN-TSIPALA	#N/A	#N/A	V8	Ind	Madagascar	PRJNA795890	T	Ref	Ref	Ref	WT	Ref	Ref	del	Ref	Alt	Ref	Ref	T	WT
IRIS-11568	SATHIYA	27.6575	85.4408	V13	Ind	Nepal	PRJNA795890	T	Ref	Ref	Ref	0.95kb	2	1_2	del	Ref	Alt	Ref	Ref	T	WT
IRIS-8279	SAWAH	6	116.467	V10	Jap	Malaysia	PRJNA795890	T	Ref	3	Ref	0.95kb	Ref	Ref	del	Ref	Alt	Ref	Ref	T	T13
IRIS-11393	SAWNG RUANG	16.8264	100.26	V12	Ind	Thailand	PRJNA795890	T	Ref	3	Ref	WT	Ref	Ref	del	Ref	Alt	Ref	Ref	T	WT
IRIS-11110	SAYAM	6.58306	79.9667	V8	Ind	Sri Lanka	PRJNA795890	T	Ref	Ref	Ref	0.95kb	Ref	Ref	Rc	Ref	Alt	Ref	Ref	C	WT
IRIS-10810	SEGON BENGGALA	-6.75	107.5	V11	Ind	Indonesia	PRJNA795890	T	Ref	3	Ref	0.95kb	Ref	1_2	del	Ref	Alt	Ref	Ref	T	WT
3K146	SELHI	21.1278	82.8006	V8	Ind	India	PRJNA795890	T	Ref	Ref	Ref	WT	Ref	Ref	del	Ref	Alt	Ref	Ref	T	WT
3K189	SERAJU	-2.69056	119.026	V10	Jap	Indonesia	PRJNA795890	T	2	3	Ref	0.95kb	Ref	Ref	Rc	Ref	Alt	Ref	Ref	T	T13
IRIS-9699	Seraup 27	2.03028	109.642	V11	Ind	Malaysia	PRJNA795890	T	Ref	3	Ref	0.95kb	Ref	1_2	del	Ref	Alt	Ref	Ref	T	WT
IRIS-10428	SERAUP 50	2.03028	109.642	V11	Ind	Malaysia	PRJNA795890	T	Ref	Ref	Ref	0.95kb	Ref	1_2	del	Ref	Alt	Ref	Ref	T	WT
3K200	SEREH	-7.05194	107.126	V7	Jap	Indonesia	PRJNA795890	T	Ref	3	Ref	WT	Ref	Ref	del	Ref	Alt	Ref	Ref	A	WT
IRIS-8557	SERENDAH SUNGAI DUA 25	2.03028	109.642	V11	Ind	Malaysia	PRJNA795890	T	2	Ref	Ref	WT	Ref	1_2	del	Ref	Alt	Ref	Ref	T	WT
IRIS-10812	SERUNEN	-4.94778	104.852	V11	Ind	Indonesia	PRJNA795890	T	Ref	Ref	Ref	WT	Ref	1_2	del	Ref	Alt	Ref	Ref	T	WT
3K196	SESAT JADI	2.03028	109.642	V11	Ind	Malaysia	PRJNA795890	T	Ref	Ref	Ref	WT	2	1_2	del	Ref	Alt	Ref	Ref	T	WT
IRIS-12227	Set	16.3831	105.258	V4	Jap	Laos	PRJNA795890	T	2	3	Ref	large	Ref	Ref	del	Ref	Alt	Ref	Ref	T	WT
IRIS-12183	SETYA	29.6136	81.5006	V9	Aus	Nepal	PRJNA795890	T	Ref	Ref	Ref	0.95kb	Ref	Ref	del	Ref	Alt	qSH3	Ref	T	T13
IRIS-11691	SHANGYIPA	27.5167	91.75	V4	Jap	Bhutan	PRJNA795890	T	Ref	Ref	Ref	WT	Ref	Ref	Rc	Ref	Alt	Ref	Ref	A	WT
IRIS-10076	SHINA MOCHI	34.7839	134.375	V5	Jap	Japan	PRJNA795890	T	Ref	Ref	Ref	1.2kb	Ref	Ref	del	glutinous	Alt	Ref	Ref	T	WT
HCY103	SHINCHIKU-IKU 103	23.71	120.94	V2	Jap	Taiwan	PRJNA485658	breeding	Ref	Ref	Ref	1.2kb	1	Ref	del	Ref	Alt	Ref	Ref	A	WT
HCY97	SHINCHIKU-IKU 97	23.71	120.94	V2	Jap	Taiwan	PRJNA485658	breeding	Ref	Ref	Ref	1.2kb	1	Ref	del	Ref	Alt	Ref	Ref	A	WT
IRIS-11214	SHITTA AMAN	24.9136	89.3358	V9	Aus	Bangladesh	PRJNA795890	T	Ref	2	Ref	WT	Ref	Ref	Rc	Ref	Alt	qSH3	Ref	T	WT
IRGC8242	SHUANG-CHIANG	#N/A	#N/A	V6	Ind	Taiwan	PRJNA557122	Ming ching	Ref	Ref	Ref	0.95kb	Ref	1_2	del	Ref	Alt	Ref	Ref	T	WT
IRIS-11969	SHYAMJIRA	27.1425	80.8575	V8	Ind	India	PRJNA795890	0	2	3	Ref	WT	Ref	Ref	del	Ref	Alt	Ref	Ref	T	WT
IRIS-8608	SI HAO NDURIA	0.56667	97.75	V11	Ind	Indonesia	PRJNA795890	T	2	3	Ref	WT	Ref	1_2	del	Ref	Alt	Ref	Ref	T	WT
IRIS-9098	SI MERIA	4.08333	96.25	V11	Ind	Indonesia	PRJNA795890	T	Ref	Ref	Ref	0.95kb	Ref	1_2	del	Ref	Alt	Ref	Ref	T	WT
IRIS-11179	SI OMPAN LAMA	1.83278	98.7569	V11	Ind	Indonesia	PRJNA795890	T	Ref	Ref	Ref	0.95kb	Ref	1_2	del	Ref	Alt	Ref	Ref	het	T13
IRIS-11317	SI RANTING	1.83278	98.7569	V11	Ind	Indonesia	PRJNA795890	T	Ref	3	Ref	WT	Ref	1_2	Rc	Ref	Alt	Ref	Ref	T	T13
IRIS-11688	SIA MOO	14.0478	101.373	V12	Ind	Thailand	PRJNA795890	T	Ref	Ref	Ref	WT	Ref	1_2	del	Ref	Alt	Ref	Ref	T	WT
IRIS-10813	SIAM BARABAI	-3.1225	115.905	V11	Ind	Indonesia	PRJNA795890	T	Ref	3	Ref	WT	2	1_2	del	Ref	Alt	Ref	Ref	T	WT
IRIS-10697	SIAM ER 16	2.03028	109.642	V11	Ind	Malaysia	PRJNA795890	T	Ref	Ref	Ref	WT	Ref	1_2	del	Ref	Alt	Ref	Ref	T	WT
IRIS-8591	SIAM ER 32	2.03028	109.642	V11	Ind	Malaysia	PRJNA795890	T	2	3	Ref	WT	Ref	1_2	del	Ref	Alt	Ref	Ref	T	WT
IRIS-10814	SIBORAS	1.83278	98.7569	V11	Ind	Indonesia	PRJNA795890	T	2	3	Ref	WT	Ref	1_2	del	Ref	Alt	Ref	Ref	T	T13
IRIS-8767	SIDIK	5.23333	95.2833	V11	Ind	Indonesia	PRJNA795890	T	2	Ref	Ref	0.95kb	Ref	1_2	del	Ref	Alt	Ref	Ref	T	WT
IRIS-10815	SIDJANGGUK	-1.37556	113.29	V7	Jap	Indonesia	PRJNA795890	T	2	3	Ref	0.95kb	Ref	Ref	del	Ref	Alt	Ref	Ref	A	T13
IRIS-10816	SIDJERO GUNDIL	-4.94778	104.852	V7	Jap	Indonesia	PRJNA795890	T	2	Ref	Ref	0.95kb	Ref	Ref	del	Ref	Alt	Ref	Ref	A	T13
IRIS-9691	SIFARASI	0.56667	97.75	V10	Jap	Indonesia	PRJNA795890	T	Ref	3	Ref	WT	Ref	Ref	del	Ref	Alt	Ref	Ref	T	T13
IRIS-8998	SIGAE	0.88333	97.5667	V10	Jap	Indonesia	PRJNA795890	T	Ref	2	Ref	WT	Ref	Ref	del	Ref	Alt	Ref	Ref	T	T13
IRIS-9867	SIGARDIS	7.28306	80.6331	V11	Ind	Sri Lanka	PRJNA795890	T	Ref	3	Ref	0.95kb	Ref	1_2	del	Ref	Alt	Ref	Ref	T	T13
IRIS-10938	SIGUPAI	4.02694	96.6297	V11	Ind	Indonesia	PRJNA795890	T	Ref	Ref	Ref	WT	Ref	1_2	del	Ref	Alt	Ref	Ref	T	WT
3K167	SIKEP BATU	-6.29694	106.195	V7	Jap	Indonesia	PRJNA795890	T	Ref	3	Ref	WT	Ref	Ref	del	Ref	Alt	Ref	Ref	A	WT
IRIS-8833	SIMET 2	1.83278	98.7569	V11	Ind	Indonesia	PRJNA795890	T	Ref	Ref	Ref	0.95kb	Ref	1_2	Rc	Ref	Alt	Ref	Ref	T	WT
IRIS-11424	SINAPLED	17.75	121.25	V10	Jap	Philippines	PRJNA795890	T	2	2	Ref	large	Ref	Ref	del	Ref	Alt	Ref	Ref	T	T13
IRIS-11932	SINDANO3	#N/A	#N/A	V8	Ind	Kenya	PRJNA795890	T	Ref	3	Ref	WT	Ref	Ref	del	Ref	Alt	Ref	Ref	C	WT
IRIS-8567	SINERBESA	15.9667	120.217	V8	Ind	Philippines	PRJNA795890	T	Ref	Ref	Ref	0.95kb	Ref	Ref	del	Ref	Alt	Ref	Ref	T	WT
3K204	SING SAI	15.3731	100.038	V4	Jap	Thailand	PRJNA795890	T	2	3	Ref	WT	Ref	Ref	del	glutinous	Alt	Ref	Ref	T	WT
3K147	SIPON	-2.69056	119.026	V7	Jap	Indonesia	PRJNA795890	T	2	Ref	Ref	0.95kb	Ref	Ref	del	Ref	Alt	Ref	Ref	A	WT
3K036	SIPULUIK ARANG	-1.22333	100.448	V11	Ind	Indonesia	PRJNA795890	T	Ref	3	Ref	WT	Ref	1_2	del	glutinous	Alt	Ref	Ref	T	WT
3K008	SIPULUT HITAM PENDEK	-2.69056	119.026	V11	Ind	Indonesia	PRJNA795890	T	Ref	2	Ref	0.95kb	Ref	1_2	del	Ref	Alt	Ref	Ref	T	WT
IRIS-10944	SIPULUT SUBANG	-1.16972	100.456	V11	Ind	Indonesia	PRJNA795890	T	2	2	Ref	0.95kb	Ref	1_2	del	het	Alt	Ref	Ref	T	WT
IRIS-11492	SIRHANTI	21.1278	82.8006	V9	Aus	India	PRJNA795890	0	Ref	2	Ref	WT	Ref	Ref	Rc	Ref	Alt	qSH3	Ref	C	WT
3K190	SITABO-TABO	-2.69056	119.026	V10	Jap	Indonesia	PRJNA795890	T	2	Ref	Ref	WT	Ref	Ref	del	Ref	Alt	Ref	Ref	T	T13
IRIS-10940	SITANDANG	4.02694	96.6297	V11	Ind	Indonesia	PRJNA795890	T	Ref	Ref	Ref	0.95kb	Ref	1_2	del	Ref	Alt	Ref	Ref	T	T13
IRIS-8664	SITORU	1.25	97.6	V10	Jap	Indonesia	PRJNA795890	T	Ref	2	Ref	1.2kb	Ref	Ref	del	Ref	Alt	Ref	Ref	T	T13
IRIS-11500	SKK	-8.48306	118.541	V8	Ind	Indonesia	PRJNA795890	T	Ref	3	Ref	WT	2	1_2	del	Ref	Alt	Ref	Ref	T	T7
IRIS-10817	SLAMET	-7.49306	112.429	V7	Jap	Indonesia	PRJNA795890	T	Ref	3	Ref	0.95kb	Ref	Ref	del	Ref	Alt	Ref	Ref	T	WT
3K148	SLOBOK	-2.69056	119.026	V7	Jap	Indonesia	PRJNA795890	T	2	3	Ref	0.95kb	Ref	Ref	del	Ref	Alt	Ref	Ref	A	WT
3K211	SOC NAU	16.4728	106.661	V12	Ind	VietNam	PRJNA795890	T	Ref	Ref	Ref	WT	Ref	1_2	del	Ref	Alt	Ref	Ref	T	WT
IRIS-12102	SOK SOV	11.4306	105.778	V12	Ind	Cambodia	PRJNA795890	T	Ref	3	Ref	WT	Ref	1_2	del	Ref	Alt	Ref	Ref	T	WT
IRIS-9695	SOLAY GHAT	30.1	67.9333	V9	Aus	Pakistan	PRJNA795890	T	Ref	2	Ref	WT	Ref	Ref	del	Ref	Alt	Ref	Ref	T	T13
IRIS-12228	Som	19.5	101.883	V4	Jap	Laos	PRJNA795890	T	Ref	3	2	1.2kb	Ref	Ref	del	glutinous	Alt	Ref	Ref	T	WT
IRIS-11716	SOSSOKA	#N/A	#N/A	V12	Ind	Guinea	PRJNA795890	T	Ref	3	Ref	WT	Ref	1_2	del	Ref	Alt	Ref	Ref	T	WT
IRIS-12143	Srau Khgnaerng	12.3317	105.963	V12	Ind	Cambodia	PRJNA795890	T	Ref	Ref	Ref	WT	Ref	1_2	del	Ref	Alt	Ref	Ref	T	WT
IRIS-8996	SRAU SENG	#N/A	#N/A	V12	Ind	VietNam	PRJNA795890	T	2	3	Ref	WT	Ref	1_2	del	Ref	Alt	Ref	Ref	T	WT
IRIS-10916	SRAU SLAP	13.1	103.2	V2	Jap	Cambodia	PRJNA795890	T	Ref	3	Ref	large	Ref	Ref	del	Ref	Alt	Ref	Ref	A	T19
IRIS-10838	SSAL BYEO	35.8592	127.336	V2	Jap	South Korea	PRJNA795890	T	Ref	Ref	Ref	1.2kb	Ref	Ref	del	Ref	Alt	Ref	Ref	A	WT
IRIS-9976	SSANGDUJO	35.8592	127.336	V13	Ind	South Korea	PRJNA795890	T	2	2	Ref	0.95kb	Ref	1_2	del	Ref	Alt	Ref	Ref	T	T7
3K149	SUDU KARAYAL	6.05	80.2167	V8	Ind	Sri Lanka	PRJNA795890	T	Ref	Ref	Ref	WT	Ref	Ref	Rc	Ref	Alt	Ref	Ref	C	WT
IRIS-8390	SUFAID 246	30.3958	69.3625	V9	Aus	Pakistan	PRJNA795890	T	Ref	Ref	Ref	WT	Ref	Ref	Rc	Ref	Alt	qSH3	Ref	C	T13
IRIS-10927	SUGA PANKHA	28.3908	84.1225	V9	Aus	Nepal	PRJNA795890	T	Ref	2	Ref	WT	Ref	Ref	Rc	Ref	Alt	qSH3	Ref	C	WT
IRIS-10987	SUNGA WALA	23.6117	90.3397	V9	Aus	Bangladesh	PRJNA795890	T	Ref	2	Ref	0.95kb	Ref	Ref	Rc	Ref	Alt	qSH3	Ref	T	WT
3K197	SUNGKAI	0.70417	101.934	V10	Jap	Indonesia	PRJNA795890	T	Ref	3	Ref	WT	Ref	Ref	del	Ref	Alt	Ref	Ref	A	T13
IRIS-8303	SURMATIYA	20.1667	80.3333	V8	Ind	India	PRJNA795890	T	Ref	Ref	Ref	WT	Ref	Ref	del	Ref	Alt	Ref	Ref	T	WT
IRIS-9996	SUWEON 295	#N/A	#N/A	V2	Jap	South Korea	PRJNA795890	I	Ref	Ref	Ref	1.2kb	Ref	Ref	del	Ref	Ref	Ref	Ref	A	WT
IRIS-10000	SUWEON 311	#N/A	#N/A	V12	Ind	South Korea	PRJNA795890	I	Ref	2	Ref	0.95kb	Ref	Ref	del	glutinous	Ref	Ref	het	T	T7
UL079	SzuMingLuTaoNo2	#N/A	#N/A	V5	Jap	Taiwan	PRJNA485658	indigenous	Ref	Ref	Ref	1.2kb	Ref	Ref	del	glutinous	Alt	Ref	Ref	T	WT
IRIS-8727	T 315	21.1278	82.8006	V8	Ind	India	PRJNA795890	T	Ref	Ref	Ref	0.95kb	2	Ref	Rc	Ref	Alt	Ref	Ref	T	WT
LR116	T KAUG PAO	#N/A	#N/A	V13	Ind	Taiwan	PRJNA485658	Ming ching	Ref	2	Ref	0.95kb	Ref	1_2	del	Ref	Alt	Ref	Ref	T	T3
IRIS-10839	TAE GU NA	35.8592	127.336	V2	Jap	South Korea	PRJNA795890	T	Ref	Ref	Ref	1.2kb	Ref	Ref	del	Ref	Ref	Ref	Ref	A	WT
UL042	Tahobin	#N/A	#N/A	V2	Jap	Taiwan	PRJNA485658	indigenous	Ref	Ref	Ref	1.2kb	Ref	Ref	del	Ref	Alt	Ref	Ref	A	T19
TS2	Tai Sen 2	24.19	120.57	V6	Ind	Taiwan	PRJNA485658	Modern variety	Ref	Ref	Ref	WT	Ref	1_2	del	Ref	Alt	Ref	Ref	T	T7
TC150	TAICHUNG 150	24.19	120.57	V2	Jap	Taiwan	PRJNA485658	Modern variety	Ref	Ref	Ref	1.2kb	1	Ref	del	Ref	Alt	Ref	Ref	A	WT
TC158	Taichung 158	24.19	120.57	V2	Jap	Taiwan	PRJNA485658	Modern variety	Ref	Ref	Ref	1.2kb	Ref	Ref	del	Ref	Alt	Ref	Ref	A	T19
TC179	TAICHUNG 179	24.19	120.57	V2	Jap	Taiwan	PRJNA485658	Modern variety	Ref	Ref	Ref	1.2kb	Ref	Ref	del	Ref	Alt	Ref	Ref	A	T19
TC188	TAICHUNG 188	24.19	120.57	V2	Jap	Taiwan	PRJNA485658	Modern variety	Ref	Ref	Ref	1.2kb	Ref	Ref	del	Ref	Alt	Ref	Ref	A	T19
TC189	Taichung 189	24.19	120.57	V2	Jap	Taiwan	PRJNA485658	Modern variety	Ref	Ref	Ref	1.2kb	Ref	Ref	del	Ref	Alt	Ref	Ref	A	T13
TC192	Taichung 192	24.19	120.57	V2	Jap	Taiwan	PRJNA485658	Modern variety	Ref	Ref	Ref	1.2kb	Ref	Ref	del	Ref	Alt	Ref	Ref	het	T19
TC194	Taichung 194	24.19	120.57	V2	Jap	Taiwan	PRJNA373799	Modern variety	Ref	Ref	Ref	WT	Ref	Ref	del	Ref	Alt	Ref	Ref	A	T13
TC65	Taichung 65	24.19	120.57	V2	Jap	Taiwan	PRJNA485658	Modern variety	Ref	Ref	Ref	1.2kb	Ref	Ref	del	Ref	Alt	Ref	Ref	A	T19
TCS17	Taichung Sen 17	24.19	120.57	V13	Ind	Taiwan	PRJNA373799	Modern variety	Ref	3	Ref	0.95kb	Ref	1_2	del	Ref	Alt	Ref	Ref	T	T7
TCS2	Taichung Sen 2	24.19	120.57	V6	Ind	Taiwan	PRJNA485658	Modern variety	Ref	3	Ref	1.2kb	Ref	1_2	del	glutinous	Alt	Ref	Ref	T	T7
TCSW1	Taichung Sen Waxy 1	24.19	120.57	V13	Ind	Taiwan	PRJNA485658	Modern variety	Ref	3	Ref	1.2kb	Ref	1_2	del	glutinous	Alt	Ref	Ref	T	T7
TCSW2	Taichung Sen Waxy 2	24.19	120.57	V13	Ind	Taiwan	PRJNA485658	Modern variety	Ref	2	Ref	0.95kb	Ref	1_2	del	Ref	Alt	Ref	Ref	T	WT
TCSY214	TAICHUNG SEN-YU 214	24.19	120.57	V11	Ind	Taiwan	PRJNA485658	breeding	Ref	2	Ref	WT	Ref	1_2	del	Ref	Alt	Ref	Ref	T	T7
LR115	TAICHUNG WOO-GEN 2	24.2	120.56	V13	Ind	Taiwan	PRJNA485658	Ming ching	Ref	Ref	Ref	0.95kb	2	1_2	del	Ref	Alt	Ref	Ref	T	T7
RED15	TaiChungred	24.19	120.57	V13	Ind	Taiwan	PRJNA485658	weedy rice	Ref	2	Ref	0.95kb	Ref	Ref	del	Ref	Alt	Ref	Ref	T	T7
TK14	Taikeng 14	24.19	120.57	V2	Jap	Taiwan	PRJNA485658	Modern variety	Ref	Ref	Ref	1.2kb	Ref	Ref	del	Ref	Alt	Ref	Ref	A	T19
TK16	Taikeng 16	24.19	120.57	V2	Jap	Taiwan	PRJNA485658	Modern variety	Ref	Ref	Ref	1.2kb	Ref	Ref	del	Ref	Alt	Ref	Ref	A	T19
TK2	Taikeng 2	24.19	120.57	V2	Jap	Taiwan	PRJNA485658	Modern variety	Ref	Ref	Ref	1.2kb	Ref	Ref	del	Ref	Alt	Ref	het	A	T19
TK8	Taikeng 8	24.19	120.57	V2	Jap	Taiwan	PRJNA485658	Modern variety	2	Ref	Ref	1.2kb	Ref	Ref	del	Ref	Alt	Ref	Ref	A	T19
TK9	Taikeng 9	24.19	120.57	V2	Jap	Taiwan	PRJNA485658	Modern variety	Ref	Ref	Ref	1.2kb	Ref	Ref	del	Ref	het	Ref	Ref	A	T13
TN5	Tainan 5	#N/A	#N/A	V2	Jap	Taiwan	PRJNA485658	Modern variety	Ref	Ref	Ref	1.2kb	Ref	Ref	del	Ref	Alt	Ref	Ref	A	T19
TN11	Tainan11	#N/A	#N/A	V2	Jap	Taiwan	PRJNA485658	Modern variety	Ref	Ref	Ref	1.2kb	Ref	Ref	del	Ref	Alt	Ref	Ref	A	T13
TNG29	Tainung 29	24.19	120.57	V2	Jap	Taiwan	PRJNA485658	Modern variety	2	Ref	Ref	1.2kb	Ref	Ref	del	Ref	Alt	Ref	Ref	A	T19
TNG69	Tainung 69	24.19	120.57	V2	Jap	Taiwan	PRJNA485658	Modern variety	Ref	Ref	Ref	1.2kb	Ref	Ref	del	Ref	Alt	Ref	Ref	A	T19
TNG70	Tainung 70	24.19	120.57	V2	Jap	Taiwan	PRJNA485658	Modern variety	Ref	Ref	Ref	1.2kb	Ref	Ref	del	Ref	Alt	Ref	Ref	A	T19
TNG71	Tainung 71	24.19	120.57	V2	Jap	Taiwan	PRJNA485658	Modern variety	Ref	Ref	Ref	1.2kb	Ref	Ref	del	Ref	Alt	Ref	Ref	A	WT
TNG72	Tainung 72	24.19	120.57	V2	Jap	Taiwan	PRJNA373799	Modern variety	Ref	Ref	Ref	1.2kb	Ref	Ref	del	glutinous	Alt	Ref	Ref	A	T19
TNG74	Tainung 74	24.19	120.57	V2	Jap	Taiwan	PRJNA485658	Modern variety	Ref	Ref	Ref	1.2kb	Ref	Ref	del	Ref	Alt	Ref	Ref	A	WT
TNG75	Tainung 75	24.19	120.57	V2	Jap	Taiwan	PRJNA485658	Modern variety	Ref	Ref	Ref	1.2kb	Ref	Ref	del	Ref	Alt	Ref	Ref	A	T19
TNG77	Tainung 77	24.19	120.57	V2	Jap	Taiwan	PRJNA485658	Modern variety	Ref	Ref	Ref	1.2kb	Ref	Ref	del	Ref	Alt	Ref	Ref	A	WT
TNG79	Tainung 79	24.19	120.57	V2	Jap	Taiwan	PRJNA485658	Modern variety	Ref	Ref	Ref	1.2kb	Ref	Ref	del	Ref	Alt	Ref	Ref	A	T19
TNG82	Tainung 82	24.19	120.57	V2	Jap	Taiwan	PRJNA485658	Modern variety	2	Ref	Ref	1.2kb	Ref	Ref	del	Ref	Alt	Ref	Ref	A	WT
TNG83	Tainung 83	24.19	120.57	V2	Jap	Taiwan	PRJNA485658	Modern variety	Ref	Ref	Ref	1.2kb	Ref	Ref	del	Ref	Alt	Ref	Ref	A	T13
TNG84	Tainung 84	24.19	120.57	V2	Jap	Taiwan	PRJNA485658	Modern variety	Ref	Ref	Ref	1.2kb	Ref	Ref	del	Ref	Alt	Ref	Ref	A	T19
TNGS19	Tainung Sen 19	24.19	120.57	V6	Ind	Taiwan	PRJNA485658	Modern variety	Ref	3	Ref	WT	Ref	Ref	del	Ref	Alt	Ref	Ref	T	T7
TNGS20	Tainung Sen 20	24.19	120.57	V6	Ind	Taiwan	PRJNA373799	Modern variety	Ref	Ref	Ref	WT	Ref	Ref	del	Ref	Alt	Ref	Ref	T	T13
TNGS22	Tainung Sen 22	24.19	120.57	V6	Ind	Taiwan	PRJNA485658	Modern variety	Ref	2	Ref	WT	Ref	1_2	del	Ref	Alt	Ref	Ref	T	T13
TNGSW2	Tainung Sen waxy 2	24.19	120.57	V6	Ind	Taiwan	PRJNA485658	Modern variety	Ref	2	Ref	0.95kb	Ref	1_2	del	glutinous	Alt	Ref	Ref	T	T7
TNG67	Tainung67	24.19	120.57	V2	Jap	Taiwan	PRJNA485658	Modern variety	Ref	Ref	Ref	1.2kb	Ref	Ref	del	Ref	Alt	Ref	Ref	A	T19
TPE11	Taipei 11	25.23	121.54	V2	Jap	Taiwan	PRJNA485658	Modern variety	Ref	Ref	Ref	1.2kb	Ref	Ref	del	Ref	Alt	Ref	Ref	A	WT
TPE141	Taipei 141	25.23	121.54	V2	Jap	Taiwan	PRJNA485658	Modern variety	Ref	Ref	Ref	1.2kb	Ref	Ref	del	Ref	Alt	Ref	Ref	A	WT
TPE167	TAIPEI 167	25.23	121.54	V9	Aro	Taiwan	PRJNA485658	Modern variety	Ref	Ref	Ref	0.95kb	Ref	Ref	del	Ref	Alt	Ref	Ref	T	WT
LR127	TAIPEI WOO-CO	25.23	121.54	V13	Ind	Taiwan	PRJNA485658	Ming ching	Ref	Ref	Ref	0.95kb	Ref	1_2	del	Ref	Alt	Ref	Ref	T	T13
TSWY1157	TAISEN GLUTINOUS YU 1157	24.19	120.57	V8	Ind	Taiwan	PRJNA485658	breeding	Ref	2	Ref	1.2kb	Ref	1_2	del	glutinous	Alt	Ref	Ref	T	T7
TT30	Taitung 30	23.01	121.23	V2	Jap	Taiwan	PRJNA485658	Modern variety	Ref	Ref	Ref	1.2kb	Ref	Ref	del	Ref	Alt	Ref	Ref	A	T19
LR126	TAITUNG WOO-LI	22.96	121.23	V13	Ind	Taiwan	PRJNA485658	Ming ching	Ref	Ref	Ref	0.95kb	Ref	1_2	del	Ref	Alt	Ref	Ref	T	T3
TTY48	Taitung Yu 48	23.01	121.23	V5	Jap	Taiwan	PRJNA485658	breeding	Ref	Ref	Ref	1.2kb	Ref	Ref	del	Ref	Alt	Ref	Ref	T	WT
IRIS-8655	TAK	#N/A	#N/A	V9	Aus	Pakistan	PRJNA795890	T	Ref	Ref	Ref	WT	Ref	Ref	Rc	Ref	Alt	qSH3	Ref	C	T13
IRIS-9283	TAK SUFAID	28.2667	68.2	V9	Aus	Pakistan	PRJNA795890	T	Ref	Ref	Ref	WT	Ref	Ref	Rc	Ref	Alt	qSH3	Ref	C	T13
IRIS-9081	TAKAO MOCHI	34.7839	134.375	V2	Jap	Japan	PRJNA795890	T	Ref	Ref	Ref	1.2kb	Ref	Ref	del	het	Alt	Ref	Ref	A	WT
IRIS-12229	TAM	20.6117	101.947	V12	Ind	Laos	PRJNA795890	T	Ref	3	Ref	0.95kb	Ref	Ref	del	glutinous	Alt	Ref	Ref	T	T7
IRIS-12311	TAM	21.4933	101.83	V4	Jap	Laos	PRJNA795890	T	2	3	Ref	1.2kb	Ref	Ref	del	glutinous	Alt	Ref	Ref	T	T12
IRIS-11181	TAMBA PERAK	1.83278	98.7569	V11	Ind	Indonesia	PRJNA795890	T	Ref	2	Ref	WT	Ref	1_2	del	Ref	Alt	Ref	Ref	T	WT
IRIS-11989	TAMBAS JANGKOK	4.58722	114.187	V11	Ind	Brunei Darussalam	PRJNA795890	T	Ref	Ref	Ref	0.95kb	Ref	1_2	Rc	Ref	Alt	Ref	Ref	T	WT
IRIS-11397	TAMBU	-0.64861	120.062	V10	Jap	Indonesia	PRJNA795890	T	Ref	Ref	Ref	1.2kb	Ref	Ref	del	Ref	Alt	Ref	Ref	A	T13
IRIS-11787	TANDAKAY FINGO	#N/A	#N/A	V8	Ind	Gambia	PRJNA795890	T	Ref	Ref	Ref	0.95kb	Ref	1_2	del	Ref	Alt	Ref	Ref	T	WT
UL034	Tangengenrankatsu	#N/A	#N/A	V6	Ind	Taiwan	PRJNA485658	indigenous	Ref	Ref	Ref	0.95kb	Ref	1_2	del	Ref	Alt	Ref	Ref	T	WT
TY3	Taoyuan 3	#N/A	#N/A	V2	Jap	Taiwan	PRJNA485658	Modern variety	2	Ref	Ref	1.2kb	Ref	Ref	del	Ref	Alt	Ref	Ref	A	WT
IRIS-12133	Tap khouay	15.9006	105.921	V12	Ind	Laos	PRJNA795890	T	2	3	Ref	0.95kb	Ref	Ref	del	glutinous	Alt	Ref	Ref	T	WT
IRIS-8781	TAPANG	2.03028	109.642	V11	Ind	Malaysia	PRJNA795890	T	Ref	Ref	Ref	WT	2	1_2	del	Ref	Alt	Ref	Ref	T	WT
UL059	Tapopuri	#N/A	#N/A	V6	Ind	Taiwan	PRJNA485658	indigenous	Ref	Ref	Ref	0.95kb	Ref	Ref	del	glutinous	Alt	Ref	Ref	T	WT
IRIS-10961	TARING PELUNDUK	0.70417	101.934	V11	Ind	Indonesia	PRJNA795890	T	Ref	3	Ref	WT	Ref	1_2	del	Ref	Alt	Ref	Ref	T	WT
UL076	Tarunatsumochi	#N/A	#N/A	V1	Jap	Taiwan	PRJNA485658	indigenous	Ref	3	Ref	WT	Ref	Ref	Rc	glutinous	Alt	Ref	Ref	A	WT
TCS10	TCS10	24.19	120.57	V6	Ind	Taiwan	PRJEB6180	Modern variety	Ref	2	Ref	WT	Ref	1_2	del	Ref	Alt	Ref	Ref	T	T13
LR107	Tek Si Chut	#N/A	#N/A	V13	Ind	Taiwan	PRJNA485658	Ming ching	Ref	2	Ref	0.95kb	Ref	Ref	del	glutinous	Alt	Ref	Ref	T	T13
IRIS-10962	TERUNG DAUN	0.70417	101.934	V11	Ind	Indonesia	PRJNA795890	T	Ref	3	Ref	WT	Ref	1_2	del	Ref	Alt	Ref	Ref	T	WT
IRIS-11081	THAO LOUANG	18.2803	103.861	V12	Ind	Laos	PRJNA795890	T	Ref	3	Ref	0.95kb	Ref	Ref	del	glutinous	Alt	Ref	Ref	T	WT
IRIS-12134	THATENG	14.7456	106.954	V4	Jap	Laos	PRJNA795890	T	Ref	3	Ref	large	Ref	Ref	del	het	Alt	Ref	Ref	T	WT
LR168	TiChuehHuaLou	#N/A	#N/A	V13	Ind	Taiwan	PRJNA485658	Ming ching	Ref	2	Ref	0.95kb	Ref	1_2	del	Ref	Alt	Ref	Ref	T	T7
LR170	TiChuehKoTzu	#N/A	#N/A	V6	Ind	Taiwan	PRJNA485658	Ming ching	Ref	Ref	Ref	0.95kb	Ref	1_2	del	Ref	Alt	Ref	Ref	T	WT
LR169	TiChuehLiuChou	#N/A	#N/A	V13	Ind	Taiwan	PRJNA485658	Ming ching	Ref	2	Ref	0.95kb	Ref	1_2	del	Ref	Alt	Ref	Ref	T	T7
LR173	TiChuehMinTang	#N/A	#N/A	V6	Ind	Taiwan	PRJNA485658	Ming ching	Ref	Ref	Ref	0.95kb	Ref	1_2	del	Ref	Alt	Ref	Ref	T	T7
LR172	TiChuehWuKo	#N/A	#N/A	V13	Ind	Taiwan	PRJNA485658	Ming ching	Ref	2	Ref	0.95kb	Ref	1_2	del	Ref	Alt	Ref	Ref	T	T7
LR015	Tien-Lai	#N/A	#N/A	V6	Ind	Taiwan	PRJNA485658	Ming ching	Ref	Ref	Ref	0.95kb	Ref	1_2	del	Ref	Alt	Ref	Ref	T	WT
IRIS-10965	TILOKCHAN	22.4167	92	V9	Aus	Bangladesh	PRJNA795890	T	Ref	2	Ref	WT	2	Ref	Rc	Ref	Alt	qSH3	Ref	C	T13
3K191	TINOLDO MARANGRAS	13.1114	121.047	V10	Jap	Philippines	PRJNA795890	T	Ref	3	Ref	WT	Ref	Ref	del	Ref	Alt	Ref	Ref	T	T13
IRIS-10821	TJ PERAK	-6.75	107.5	V11	Ind	Indonesia	PRJNA795890	T	Ref	Ref	Ref	0.95kb	Ref	1_2	del	Ref	Alt	Ref	Ref	T	T7
IRIS-10746	TJEMPO KREMBUNG	-2.69056	119.026	V7	Jap	Indonesia	PRJNA795890	T	2	3	Ref	large	Ref	Ref	del	Ref	Alt	Ref	Ref	het	T13
IRIS-10818	TJEMPO PENDEK-UNTUNG	0.70417	101.934	V11	Ind	Indonesia	PRJNA795890	T	Ref	Ref	Ref	WT	2	1_2	del	Ref	Alt	Ref	Ref	T	WT
IRIS-10819	TJERE ENER	-6.75	107.5	V11	Ind	Indonesia	PRJNA795890	T	Ref	Ref	Ref	0.95kb	Ref	1_2	Rc	Ref	Alt	Ref	Ref	T	T7
IRIS-10820	TJERE MANGGA	-6.75	107.5	V11	Ind	Indonesia	PRJNA795890	T	Ref	Ref	Ref	large	Ref	1_2	het	Ref	Alt	Ref	Ref	T	T13
IRIS-9005	TJERE SUGI	-2.69056	119.026	V11	Ind	Indonesia	PRJNA795890	T	Ref	3	Ref	0.95kb	Ref	1_2	Rc	Ref	Alt	Ref	Ref	T	T13
3K212	TJOKRON	-2.69056	119.026	V10	Jap	Indonesia	PRJNA795890	T	Ref	3	Ref	0.95kb	Ref	Ref	Rc	Ref	Alt	qSH3	Ref	T	WT
TCN1	TN1	24.19	120.57	V13	Ind	Taiwan	PRJNA485658	Modern variety	Ref	2	Ref	0.95kb	Ref	1_2	del	Ref	Alt	Ref	Ref	T	T7
IRIS-11659	TOBOHUN	#N/A	#N/A	V10	Jap	Sierra Leone	PRJNA795890	T	2	3	Ref	WT	Ref	Ref	del	Ref	Alt	Ref	Ref	T	WT
IRIS-11398	TODULI	-0.65028	119.814	V11	Ind	Indonesia	PRJNA795890	T	Ref	Ref	Ref	WT	2	1_2	del	Ref	Alt	Ref	Ref	T	WT
3K168	TOLIL 14	2.03028	109.642	V12	Ind	Malaysia	PRJNA795890	T	Ref	3	Ref	WT	Ref	Ref	del	Ref	Alt	Ref	Ref	T	WT
3K198	TON TIA GUAY NU	14.4742	100.118	V4	Jap	Thailand	PRJNA795890	T	Ref	3	Ref	WT	Ref	Ref	del	Ref	Alt	Ref	Ref	T	WT
IRIS-9288	TONG MAH	18.145	100.141	V12	Ind	Thailand	PRJNA795890	T	2	3	Ref	WT	Ref	1_2	del	Ref	Alt	Ref	Ref	T	WT
UL091	Tongsisai	#N/A	#N/A	V1	Jap	Taiwan	PRJNA485658	indigenous	2	3	Ref	1.2kb	Ref	Ref	Rc	glutinous	Alt	Ref	Ref	T	WT
IRIS-12231	TOUN	17	105	V12	Ind	Laos	PRJNA795890	T	Ref	2	Ref	0.95kb	Ref	Ref	del	glutinous	Alt	Ref	Ref	T	WT
IRIS-10918	TQQI QINYUHAYUHA	17.2	120.75	V10	Jap	Philippines	PRJNA795890	T	2	3	Ref	0.95kb	Ref	Ref	Rc	Ref	Alt	Ref	Ref	A	T13
IRIS-10750	TRANG LUA	16.4728	106.661	V12	Ind	VietNam	PRJNA795890	T	Ref	Ref	Ref	0.95kb	Ref	1_2	del	Ref	Alt	Ref	Ref	T	WT
3K108	TRES MESES	#N/A	#N/A	V10	Jap	Brazil	PRJNA795890	T	Ref	3	Ref	WT	Ref	Ref	del	Ref	Alt	Ref	Ref	T	T13
LR216	TSAI-YUAN-CHON	#N/A	#N/A	V13	Ind	Taiwan	PRJNA485658	Ming ching	Ref	2	Ref	0.95kb	Ref	1_2	del	Ref	Alt	Ref	Ref	T	T7
IRIS-9469	TSAO SHENG LI 1	35.86	104.166	V13	Ind	China	PRJNA795890	T	2	Ref	Ref	0.95kb	2	1_2	del	Ref	Alt	Ref	Ref	T	T3
IRIS-10583	TSAO-SIAO-PEH-TAO	#N/A	#N/A	V2	Jap	China	PRJNA795890	0	Ref	Ref	Ref	1.2kb	Ref	Ref	del	Ref	Alt	Ref	Ref	A	WT
IRIS-9048	TSCHINANANGKA	27.5	90.5	V4	Jap	Bhutan	PRJNA795890	T	2	Ref	Ref	1.2kb	Ref	Ref	del	Ref	Alt	Ref	Ref	A	WT
3K121	TSIVIMBININA	#N/A	#N/A	V10	Jap	Madagascar	PRJNA795890	T	2	3	Ref	WT	Ref	Ref	del	Ref	Alt	Ref	Ref	T	T13
IRIS-11556	TUBMAN	#N/A	#N/A	V11	Ind	Sierra Leone	PRJNA795890	T	Ref	Ref	Ref	0.95kb	Ref	1_2	del	Ref	Alt	Ref	Ref	T	T13
IRIS-11318	TUBU	1.24972	124.833	V11	Ind	Indonesia	PRJNA795890	T	Ref	3	Ref	WT	Ref	1_2	del	Ref	Alt	Ref	Ref	T	T13
3K025	TUI	18.8319	121.856	V11	Ind	Philippines	PRJNA795890	T	Ref	Ref	Ref	0.95kb	Ref	1_2	Rc	Ref	Alt	Ref	Ref	T	WT
IRIS-9188	TUMBA	1.11667	97.7667	V11	Ind	Indonesia	PRJNA795890	T	Ref	Ref	Ref	0.95kb	Ref	1_2	del	Ref	Alt	Ref	Ref	T	WT
TUL1	Tunglu1	23.01	121.23	V2	Jap	Taiwan	PRJNA485658	Modern variety	Ref	Ref	Ref	1.2kb	Ref	Ref	del	Ref	Alt	Ref	Ref	A	WT
TUL2	Tunglu2	23.01	121.23	V2	Jap	Taiwan	PRJNA485658	Modern variety	Ref	3	Ref	1.2kb	Ref	Ref	del	Ref	Alt	Ref	Ref	A	WT
TUL3	Tunglu3	23.01	121.23	V5	Jap	Taiwan	PRJNA485658	Modern variety	Ref	Ref	Ref	1.2kb	Ref	Ref	del	Ref	Alt	Ref	Ref	A	WT
IRIS-8754	TYPE 50	26	81.5333	V8	Ind	India	PRJNA795890	T	Ref	Ref	Ref	0.95kb	Ref	Ref	del	Ref	Alt	Ref	Ref	C	WT
IRIS-10822	UNGGAS	-1.22333	100.448	V11	Ind	Indonesia	PRJNA795890	T	Ref	Ref	Ref	0.95kb	2	1_2	del	Ref	Alt	Ref	Ref	T	WT
IRIS-9694	UNGGUL	4.93333	115.883	V11	Ind	Malaysia	PRJNA795890	T	Ref	Ref	Ref	WT	2	1_2	del	Ref	Alt	Ref	Ref	T	WT
UL060	Unknown	#N/A	#N/A	V6	Ind	Taiwan	PRJNA485658	indigenous	Ref	Ref	Ref	0.95kb	Ref	Ref	del	glutinous	Alt	Ref	Ref	T	T13
3K099	UNNAMED	14.67	99.0128	V4	Jap	Thailand	PRJNA795890	T	2	3	Ref	WT	Ref	Ref	Rc	Ref	Alt	Ref	Ref	T	WT
UL234	UNNAMED	#N/A	#N/A	V6	Ind	Taiwan	PRJNA485658	indigenous	Ref	Ref	Ref	0.95kb	Ref	1_2	Rc	Ref	Alt	Ref	Ref	T	WT
IRIS-11619	UPRH166	27.1425	80.8575	V9	Aus	India	PRJNA795890	T	Ref	2	Ref	WT	Ref	Ref	Rc	Ref	Alt	qSH3	Ref	C	T13
IRIS-11620	UPRH197	27.1425	80.8575	V9	Aus	India	PRJNA795890	T	Ref	Ref	Ref	WT	Ref	1_2	Rc	Ref	Alt	Ref	Ref	T	T13
IRIS-8435	UPRH233	27.1425	80.8575	V13	Ind	India	PRJNA795890	T	2	Ref	Ref	0.95kb	2	Ref	del	Ref	Alt	Ref	Ref	T	T3
IRIS-11617	UPRH33	27.1425	80.8575	V9	Aus	India	PRJNA795890	T	Ref	2	Ref	WT	Ref	1_2	Rc	Ref	Alt	qSH3	Ref	C	T13
IRIS-11618	UPRH58	27.1425	80.8575	V9	Aus	India	PRJNA795890	T	Ref	Ref	Ref	WT	Ref	Ref	Rc	Ref	Alt	qSH3	Ref	C	T13
IRIS-8305	URAIBOOL	21.1278	82.8006	V8	Ind	India	PRJNA795890	T	Ref	Ref	Ref	WT	Ref	Ref	del	Ref	Alt	Ref	Ref	T	WT
IRIS-10823	UTRI DELI	0.70417	101.934	V11	Ind	Indonesia	PRJNA795890	T	Ref	Ref	Ref	WT	2	1_2	del	Ref	Alt	Ref	Ref	T	T7
IRIS-11209	VADAI	25.9	89.0333	V8	Ind	Bangladesh	PRJNA795890	T	Ref	Ref	Ref	0.95kb	Ref	Ref	Rc	Ref	Alt	Ref	Ref	T	WT
3K026	VAIKATHARYAN	21.1278	82.8006	V8	Ind	India	PRJNA795890	T	Ref	Ref	Ref	0.95kb	Ref	1_2	Rc	Ref	Alt	Ref	Ref	T	WT
3K150	VARIRANGAHY	#N/A	#N/A	V7	Jap	Madagascar	PRJNA795890	T	Ref	3	Ref	0.95kb	Ref	Ref	del	Ref	Alt	Ref	Ref	T	T13
IRIS-11791	VARY LAHY	#N/A	#N/A	V8	Ind	Madagascar	PRJNA795890	T	2	Ref	Ref	WT	Ref	1_2	del	Ref	Alt	Ref	Ref	C	WT
IRIS-9745	VARY MALADY	#N/A	#N/A	V10	Jap	Madagascar	PRJNA795890	T	Ref	3	Ref	WT	Ref	Ref	del	Ref	Alt	Ref	Ref	T	T13
IRIS-10719	VELLAI KOLOMBAN	7.7	81.7	V8	Ind	Sri Lanka	PRJNA795890	T	Ref	Ref	Ref	0.95kb	Ref	Ref	Rc	Ref	Alt	Ref	Ref	T	WT
IRIS-12345	Vieng	#N/A	#N/A	V4	Jap	Laos	PRJNA795890	T	2	3	2	1.2kb	Ref	Ref	del	Ref	Alt	Ref	Ref	T	WT
IRIS-12322	VOK	#N/A	#N/A	V4	Jap	Laos	PRJNA795890	T	2	3	2	1.2kb	Ref	Ref	del	Ref	Alt	Ref	Ref	T	WT
IRIS-11792	VONBOANGY	#N/A	#N/A	V10	Jap	Madagascar	PRJNA795890	T	Ref	3	Ref	WT	Ref	Ref	del	Ref	Alt	Ref	Ref	T	T13
IRIS-11964	VUOTTA SAIL	25.8333	89.25	V8	Ind	Bangladesh	PRJNA795890	T	Ref	Ref	Ref	WT	Ref	1_2	del	Ref	Alt	Ref	Ref	T	WT
RED06	W114	#N/A	#N/A	V13	Ind	Taiwan	PRJNA485658	weedy rice	Ref	2	Ref	0.95kb	Ref	1_2	Rc	Ref	Alt	Ref	Ref	T	T3
RED04	W158	#N/A	#N/A	V13	Ind	Taiwan	PRJNA485658	weedy rice	Ref	2	Ref	0.95kb	Ref	1_2	Rc	Ref	Alt	Ref	Ref	T	T7
RED05	W175	#N/A	#N/A	V13	Ind	Taiwan	PRJNA485658	weedy rice	Ref	2	Ref	0.95kb	Ref	1_2	Rc	Ref	Alt	Ref	Ref	T	T7
RED11	W211	#N/A	#N/A	V6	Ind	Taiwan	PRJNA485658	weedy rice	Ref	3	Ref	1.2kb	Ref	1_2	del	glutinous	Alt	Ref	Ref	T	T3
RED12	W268	#N/A	#N/A	V6	Ind	Taiwan	PRJNA485658	weedy rice	Ref	3	Ref	0.95kb	2	1_2	Rc	Ref	Alt	Ref	Ref	T	T3
RED07	W329	#N/A	#N/A	V13	Ind	Taiwan	PRJNA485658	weedy rice	Ref	2	Ref	0.95kb	Ref	1_2	Rc	Ref	Alt	Ref	Ref	T	T7
RED13	W33	#N/A	#N/A	V6	Ind	Taiwan	PRJNA485658	weedy rice	Ref	2	Ref	0.95kb	Ref	1_2	Rc	Ref	Alt	Ref	Ref	T	T7
RED01	W36	#N/A	#N/A	V6	Ind	Taiwan	PRJNA485658	weedy rice	Ref	3	Ref	WT	Ref	1_2	del	glutinous	Alt	Ref	Ref	T	T3
RED02	W427	#N/A	#N/A	V13	Ind	Taiwan	PRJNA485658	weedy rice	Ref	2	Ref	0.95kb	Ref	1_2	del	het	Alt	Ref	Ref	het	WT
RED03	W68	#N/A	#N/A	V14	Ind	Taiwan	PRJNA485658	weedy rice	Ref	3	Ref	0.95kb	2	1_2	Rc	Ref	Alt	Ref	Ref	T	T3
IRIS-9890	WA BANG	35.8592	127.336	V2	Jap	South Korea	PRJNA795890	T	Ref	Ref	Ref	1.2kb	Ref	Ref	del	Ref	Alt	Ref	Ref	A	WT
IRIS-11511	WAGASAN	17.0642	121.168	V10	Jap	Philippines	PRJNA795890	T	Ref	3	Ref	WT	Ref	Ref	Rc	Ref	Alt	Ref	Ref	T	T13
IRIS-11346	WAGWAG PUTI	15.7342	121.566	V8	Ind	Philippines	PRJNA795890	T	Ref	Ref	Ref	WT	Ref	1_2	del	Ref	Alt	Ref	Ref	T	T13
IRIS-9611	WANGA BARUGULU	26.905	75.8011	V8	Ind	India	PRJNA795890	T	Ref	Ref	Ref	WT	Ref	Ref	del	Ref	Alt	Ref	Ref	T	T20
3K117	WANGKOD	5.51667	116.233	V8	Ind	Malaysia	PRJNA795890	T	2	3	Ref	0.95kb	Ref	Ref	del	Ref	Alt	Ref	Ref	T	WT
LR193	Wan-Pai-Shih	#N/A	#N/A	V13	Ind	Taiwan	PRJNA485658	Ming ching	Ref	2	Ref	0.95kb	Ref	1_2	Rc	Ref	Alt	Ref	Ref	T	T7
UL078	Warisanmochi 2	#N/A	#N/A	V1	Jap	Taiwan	PRJNA485658	indigenous	2	3	Ref	WT	Ref	Ref	del	glutinous	Alt	Ref	Ref	T	WT
UL077	Warisanmochi1	#N/A	#N/A	V2	Jap	Taiwan	PRJNA485658	indigenous	Ref	Ref	Ref	large	Ref	Ref	del	Ref	Ref	Ref	Ref	A	T19
IRIS-12217	WEONJU 8	35.8592	127.336	V2	Jap	South Korea	PRJNA795890	P	Ref	Ref	Ref	1.2kb	Ref	Ref	Rc	Ref	Alt	Ref	Ref	A	WT
IRIS-8732	WP36	13.0394	101.492	V12	Ind	Thailand	PRJNA795890	T	Ref	3	Ref	WT	Ref	Ref	del	Ref	Alt	Ref	Ref	T	T7
IRIS-11610	WUA PAN LAK	8.5375	99.7231	V11	Ind	Thailand	PRJNA795890	T	2	3	Ref	WT	Ref	1_2	del	Ref	Alt	Ref	Ref	T	WT
LR178	WuChan	#N/A	#N/A	V13	Ind	Taiwan	PRJNA623980	Ming ching	Ref	2	Ref	0.95kb	Ref	1_2	del	Ref	Alt	Ref	Ref	T	T7
LR180	WuKo	#N/A	#N/A	V13	Ind	Taiwan	PRJNA485658	Ming ching	Ref	Ref	Ref	0.95kb	Ref	1_2	del	Ref	Alt	Ref	Ref	T	T3
IRIS-11660	WULE DASIMA	#N/A	#N/A	V10	Jap	Liberia	PRJNA795890	T	Ref	3	Ref	WT	Ref	Ref	del	Ref	Alt	Ref	Ref	T	WT
IRIS-11954	XIA HONG GU	35.86	104.166	V13	Ind	China	PRJNA795890	0	Ref	Ref	Ref	0.95kb	2	1_2	Rc	Ref	Alt	Ref	Ref	A	T7
3K046	XIANG CHANG ZAO	#N/A	#N/A	V13	Ind	China	PRJNA795890	0	Ref	2	Ref	0.95kb	2	1_2	del	Ref	Alt	Ref	Ref	T	WT
3K045	XIA-ZHI-BAI	#N/A	#N/A	V13	Ind	China	PRJNA795890	0	Ref	2	Ref	WT	2	Ref	del	Ref	Alt	Ref	Ref	T	WT
3K152	YAH YAW	8.11917	99.1011	V10	Jap	Thailand	PRJNA795890	T	Ref	3	Ref	WT	Ref	Ref	del	Ref	Alt	qSH3	Ref	A	T13
3K116	YAHNG LEU	18.9667	98.8	V4	Jap	Thailand	PRJNA795890	T	Ref	3	Ref	WT	Ref	Ref	del	Ref	Alt	Ref	Ref	T	WT
IRIS-12010	YAN ZHAN	23.7489	108.302	V13	Ind	China	PRJNA795890	0	Ref	Ref	Ref	0.95kb	2	1_2	Rc	Ref	Alt	Ref	Ref	T	T7
IRIS-12289	YARSABA	19.5108	97.3617	V4	Jap	Myanmar	PRJNA795890	T	Ref	3	Ref	1.2kb	Ref	Ref	del	Ref	Alt	Ref	Ref	T	WT
IRIS-10840	YE ZO	35.8592	127.336	V2	Jap	South Korea	PRJNA795890	T	Ref	Ref	Ref	1.2kb	Ref	Ref	del	Ref	Alt	Ref	Ref	A	WT
IRIS-9891	YONG AN HUK	35.8592	127.336	V2	Jap	South Korea	PRJNA795890	T	Ref	Ref	Ref	1.2kb	Ref	Ref	del	Ref	Ref	Ref	Ref	A	WT
GY1	Yoshino 1	#N/A	#N/A	V2	Jap	Taiwan	PRJNA485658	Modern variety	Ref	Ref	Ref	1.2kb	Ref	Ref	del	Ref	Alt	Ref	Ref	A	WT
IRIS-10078	YOSHINO MOCHI	34.7839	134.375	V5	Jap	Japan	PRJNA795890	T	2	Ref	Ref	1.2kb	Ref	Ref	del	glutinous	Alt	Ref	Ref	T	WT
LR004	Yuan-Li	#N/A	#N/A	V13	Ind	Taiwan	PRJNA485658	Ming ching	Ref	Ref	Ref	0.95kb	Ref	Ref	del	Ref	Alt	Ref	Ref	T	T7
IRIS-11911	YUN NAN ZHAN	#N/A	#N/A	V13	Ind	China	PRJNA795890	0	Ref	Ref	Ref	0.95kb	Ref	1_2	Rc	Ref	Alt	Ref	Ref	T	T13
CX355	Yunlu 102	#N/A	#N/A	V10	Jap	China	PRJNA795890	P	Ref	3	Ref	WT	Ref	Ref	del	Ref	Alt	Ref	Ref	A	T13
CX359	Yunlu 103	#N/A	#N/A	V10	Jap	China	PRJNA795890	P	Ref	3	Ref	WT	Ref	Ref	del	Ref	Alt	qSH3	Ref	A	T13
IRIS-11210	ZARBASAIL	25.6333	88.6167	V9	Aus	Bangladesh	PRJNA795890	T	Ref	2	Ref	0.95kb	Ref	1_2	Rc	Ref	Alt	qSH3	Ref	C	T13
IRIS-11813	ZERO	#N/A	#N/A	V12	Ind	Kenya	PRJNA795890	T	Ref	3	Ref	WT	Ref	1_2	Rc	Ref	Alt	Ref	Ref	T	WT
3K153	ZHAO DAN AI	23.7489	108.302	V13	Ind	China	PRJNA795890	T	Ref	Ref	Ref	0.95kb	2	1_2	del	Ref	Alt	Ref	Ref	T	WT
3K154	ZINYA KOLAMBA	21.01	75.56	V8	Ind	India	PRJNA795890	T	Ref	Ref	Ref	WT	Ref	Ref	del	Ref	Alt	Ref	Ref	T	WT
IRIS-11528	ZO	#N/A	#N/A	V12	Ind	Cote dIvoire	PRJNA795890	T	Ref	3	Ref	WT	Ref	Ref	del	Ref	Alt	Ref	Ref	T	WT

## Sheet: Table S3
Table S3. Taiwan indigenous rice accessions used in the study. Accession names, sub-species, tribe where collected, and estimated collecting time are listed. (Excel file)
ID	Name	type	tribe information	原住民 族名	collecting time	note	accession	biosample_accession	蒐集系名
LR221	P 170	ind	N/A		~1970	from IRRI seed bank	SRR24831593	SAMN35003863
LR224	PIN CHUAN B	ind	N/A		~1970	from IRRI seed bank	SRR24831592	SAMN35003864
LR235	QUANTUNG	ind	N/A		~1970	from IRRI seed bank	SRR24831591	SAMN35003865
S814	SEN 8-14	jap	N/A		~1970	from IRRI seed bank	SRR24831565	SAMN35003960
UL021	Purahaitairin	jap	N/A		~1900	collected by Japanese	SRR7691061	SAMN09812207	舖拉哈伊他伊哩恩
UL022	Hopotsutaiyaru	ind	Atayal	泰雅族	~1900	collected by Japanese	SRR24831633	SAMN35003792	禾朴喔他伊鴨嚕
UL026	Ragasu	jap	N/A		~1900	collected by Japanese	SRR24831632	SAMN35003879	拉卡斯
UL027	Pairauwar	jap	Tsou	鄒族	~1900	collected by Japanese	SRR24831524	SAMN35003880	拍伊鴨烏哇嚕
UL028	Nutsurikui	jap	N/A		~1900	collected by Japanese	SRR13991512	SAMN18344040	奴資哩哇伊
UL029	Midon	ind	N/A		~1900	collected by Japanese	SRR24831503	SAMN35003793	咪獨恩
UL030	Burieuraozu	jap	N/A		~1900	collected by Japanese	SRR24831492	SAMN35003881	不哩耶烏囉喔資
UL031	Papito	jap	N/A		~1900	collected by Japanese	SRR24831481	SAMN35003882	怕皮托
UL032	Mandarakiku	jap	N/A		~1900	collected by Japanese	SRR24831470	SAMN35003883	媽恩達拉克伊枯
UL033	Pairaur	jap	Tsou	鄒族	~1900	collected by Japanese	SRR24831459	SAMN35003884	怕伊鴨烏嚕
UL034	Tangengenrankatsu	ind	N/A		~1900	collected by Japanese	SRR7691064	SAMN09812208	他恩開恩開恩拉恩卡資
UL035	Paotsupagaiahon	ind	Atayal	泰雅族	~1900	collected by Japanese	SRR24831448	SAMN35003885	朴喔怕卡伊阿禾恩
UL036	Montana	jap	N/A		~1900	collected by Japanese	SRR5242464	SAMN06314235	摸恩他那
UL037	Muteka	jap	N/A		~1900	collected by Japanese	SRR7691065	SAMN09812209	畝帖伊卡
UL038	Haifugoya	jap	N/A		~1900	collected by Japanese	SRR24831437	SAMN35003886	哈伊乎哥鴨
UL039	Natara	jap	N/A		~1900	collected by Japanese	SRR13991505	SAMN18344041	那他拉
UL040	Pazumatamaru	jap	Bunun	布農族	~1900	collected by Japanese	SRR24831631	SAMN35003887	怕資媽他媽嚕
UL041	Kabofu	jap	N/A		~1900	collected by Japanese	SRR24831620	SAMN35003888	卡鉢乎
UL042	Tahobin	jap	N/A		~1900	collected by Japanese	SRR24831609	SAMN35003889	他禾喔皮恩
UL043	Nabohai	jap	N/A		~1900	collected by Japanese	SRR24831600	SAMN35003890	那鉢喔哈伊
UL044	Nakairitsu	jap	N/A		~1900	collected by Japanese	SRR5239878	SAMN06314236	那卡伊哩斯
UL045	Munagurusu	jap	N/A		~1900	collected by Japanese	SRR13991504	SAMN18344042	畝那姑嚕斯
UL046	Kabotsumame	jap	Atayal?	泰雅族	~1900	collected by Japanese	SRR7691063	SAMN09812211	卡鉢資媽美
UL047	Bohai	jap	N/A		~1900	collected by Japanese	SRR7691062	SAMN09812210	鉢哈伊
UL048	Gurusu	jap	N/A		~1900	collected by Japanese	SRR13991503	SAMN18344043	姑嚕斯
UL049	Matara	jap	N/A		~1900	collected by Japanese	SRR5242465	SAMN06314237	媽他拉
UL050	Nobohai	ind	N/A		~1900	collected by Japanese	SRR7691068	SAMN09812212	納鉢哈伊
UL051	Parahainakoru	ind	N/A		~1900	collected by Japanese	SRR7691060	SAMN09812214	怕拉哈伊那科嚕
UL052	Habun No1	ind	N/A		~1900	collected by Japanese	SRR24831589	SAMN35003794	哈不恩1號
UL053	Nakarofukarapai S1	jap	Tsou	鄒族	~1900	collected by Japanese	SRR24831578	SAMN35003891	那卡囉乎卡拉怕伊S1
UL054	Napatsupai	ind	Tsou	鄒族	~1900	collected by Japanese	SRR24831567	SAMN35003795	那拍拍伊
UL055	Chuan No. 2	jap	N/A		~1900	collected by Japanese	SRR13991502	SAMN18344044	撰2號
UL056	Chuan No. 3	jap	N/A		~1900	collected by Japanese	SRR13991501	SAMN18344045	撰3號
UL057	Chuan No. 4	jap	N/A		~1900	collected by Japanese	SRR5239629	SAMN06314238	撰4號
UL058	Ragarasu	ind	Paiwan	排灣族	~1900	collected by Japanese	SRR7691069	SAMN09812213	拉卡拉斯
UL059	Tapopuri	ind	Rukai/Siraya	魯凱族	~1900	collected by Japanese	SRR7691067	SAMN09812216	他朴舖喱
UL060	Unknown	ind	N/A		~1900	collected by Japanese	SRR24831557	SAMN35003796	失名陸稻
UL061	Pakaikauneku	ind	Atayal/Rukai	泰雅族	~1900	collected by Japanese	SRR24831546	SAMN35003788	怕喔柯伊烏捏枯
UL062	Kaisentetsuchitsu	ind	N/A		~1900	collected by Japanese	SRR24831535	SAMN35003797	卡伊些恩帖資基資
UL063	Napatsupai S3	ind	Tsou		~1900	collected by Japanese	SRR24831523	SAMN35003798	那他怕斯S3
UL064	Baridon	ind	Paiwan	排灣族	~1900	collected by Japanese	SRR24831512	SAMN35003799	拔喱躲恩
UL075	Paerizumochi	ind	Seediq/Tsou	鄒族	~1900	collected by Japanese	SRR24831511	SAMN35003800	佩耶喱資糯
UL076	Tarunatsumochi	jap	N/A		~1900	collected by Japanese	SRR24831510	SAMN35003892	他嚕那斯糯
UL077	Warisanmochi 1	jap	Saisiat	賽夏族	~1900	collected by Japanese	SRR24831509	SAMN35003893	哇喱薩恩糯 1
UL078	Warisanmochi 2	jap	Saisiat	賽夏族	~1900	collected by Japanese	SRR24831508	SAMN35003894	哇喱薩恩糯 2
UL079	Szu Ming Lu Tao No 2	jap	N/A		~1900	collected by Japanese	SRR24831507	SAMN35003895	失名陸稻糯 2
UL080	Komapatai	jap	Paiwan	排灣族	~1900	collected by Japanese	SRR13991500	SAMN18344046	科媽阿怕他伊
UL081	Pagaitsuitaiyaru	jap	Atayal	泰雅族	~1900	collected by Japanese	SRR24831506	SAMN35003896	怕阿卡伊資伊他伊鴨嚕
UL082	Airaromu	jap	N/A		~1900	collected by Japanese	SRR13991499	SAMN18344047	阿伊拉囉畝
UL083	Pazumataharu	jap	Bunun	布農族	~1900	collected by Japanese	SRR13991498	SAMN18344048	怕阿資媽他哈嚕
UL084	Nakara 2	jap	N/A		~1900	collected by Japanese	SRR13991511	SAMN18344049	那卡那 2
UL085	Nakabo	jap	N/A		~1900	collected by Japanese	SRR7691066	SAMN09812215	那卡鉢
UL086	Naguton	jap	N/A		~1900	collected by Japanese	SRR13991510	SAMN18344050	拔姑托恩
UL087	Komonawai	jap	N/A		~1900	collected by Japanese	SRR13991509	SAMN18344051	科摸那哇伊
UL088	Pintowan 1	jap	N/A		~1900	collected by Japanese	SRR24831505	SAMN35003897	皮殷托彎 1
UL089	Koodngoi	jap	N/A		~1900	collected by Japanese	SRR13991508	SAMN18344052	科喔登卡阿伊
UL090	Kahorui	jap	N/A		~1900	collected by Japanese	SRR13991507	SAMN18344053	那禾嚕伊
UL091	Tongsisai	jap	N/A		~1900	collected by Japanese	SRR13991506	SAMN18344054	堂西曬
UL092	Banadoion	jap	N/A		~1900	collected by Japanese	SRR24831504	SAMN35003898	巴那獨伊喔恩
UL100	Patsupatsu	jap	Bunun	布農族	~1900	collected by Japanese	SRR24831502	SAMN35003899	拍資拍資
UL103	RuiYan	jap	Atayal	泰雅族	~2000	collected by TW breeders	SRR5239949	SAMN06314230	銀珠香米 (瑞岩)
UL104	INAGU	jap	Atayal	泰雅族	~2000	collected by TW breeders	SRR13991513	SAMN18344039	伊娜谷香糯
UL105	Hualien7	jap	Amis	阿美族	~1980	collected by TW breeders	SRR24831501	SAMN35003900	花蓮蒐集系7
UL106	Hualien13	jap	Amis	阿美族	~1980	collected by TW breeders	SRR24831500	SAMN35003901	花蓮蒐集系13
UL107	Hualien20	jap	Amis	阿美族	~1980	collected by TW breeders	SRR24831499	SAMN35003902	花蓮蒐集系20
UL108	Hualien27	jap	Amis	阿美族	~1980	collected by TW breeders	SRR24831498	SAMN35003903	花蓮蒐集系27
UL109	Hualien33	jap	Amis	阿美族	~1980	collected by TW breeders	SRR24831497	SAMN35003904	花蓮蒐集系33
UL110	Hualien40	ind	Amis	阿美族	~1980	collected by TW breeders	SRR24831496	SAMN35003801	花蓮蒐集系40
UL111	Hualien49	jap	Amis	阿美族	~1980	collected by TW breeders	SRR24831495	SAMN35003905	花蓮蒐集系49
UL112	Hualien52	jap	Amis	阿美族	~1980	collected by TW breeders	SRR24831494	SAMN35003906	花蓮蒐集系52
UL113	Hualien60	jap	Amis	阿美族	~1980	collected by TW breeders	SRR24831493	SAMN35003907	花蓮蒐集系60
UL114	Hualien71	ind	Amis	阿美族	~1980	collected by TW breeders	SRR24831491	SAMN35003802	花蓮蒐集系71
UL115	Hualien79	ind	Amis	阿美族	~1980	collected by TW breeders	SRR24831490	SAMN35003803	花蓮蒐集系79
UL116	Hualien81	ind	Amis	阿美族	~1980	collected by TW breeders	SRR24831489	SAMN35003804	花蓮蒐集系81
UL117	Hualien82	jap	Amis	阿美族	~1980	collected by TW breeders	SRR24831488	SAMN35003908	花蓮蒐集系82
UL118	Hualien123	ind	Amis	阿美族	~1980	collected by TW breeders	SRR24831487	SAMN35003805	花蓮蒐集系123
UL119	Hualien124	ind	Amis	阿美族	~1980	collected by TW breeders	SRR14637439	SAMN19321649	花蓮蒐集系124
UL120	Hualien125	ind	Amis	阿美族	~1980	collected by TW breeders	SRR24831486	SAMN35003806	花蓮蒐集系125
UL121	Hualien126	jap	Amis	阿美族	~1980	collected by TW breeders	SRR24831485	SAMN35003909	花蓮蒐集系126
UL124	PaKengKeng	ind	Paiwan, Rukai	排灣族	~1980	collected by TW breeders	SRR24831484	SAMN35003807	帕更梗
UL126	CD1	jap	Tsou	鄒族	~1980	collected by TW breeders	SRR24831483	SAMN35003910	啟東蒐集系1
UL127	CD2	jap	Tsou	鄒族	~1980	collected by TW breeders	SRR24831482	SAMN35003911	啟東蒐集系2
UL128	CD5	ind	Tsou	鄒族	~1980	collected by TW breeders	SRR24831480	SAMN35003808	啟東蒐集系5
UL129	CD7	jap	Tsou	鄒族	~1980	collected by TW breeders	SRR24831479	SAMN35003912	啟東蒐集系7
UL130	CD8	jap	Tsou	鄒族	~1980	collected by TW breeders	SRR24831478	SAMN35003913	啟東蒐集系8
UL131	CD9	jap	Tsou	鄒族	~1980	collected by TW breeders	SRR24831477	SAMN35003914	啟東蒐集系9
UL132	CD10	jap	Tsou	鄒族	~1980	collected by TW breeders	SRR24831476	SAMN35003915	啟東蒐集系10
UL133	CD12	jap	Tsou	鄒族	~1980	collected by TW breeders	SRR24831475	SAMN35003916	啟東蒐集系12
UL134	CD13	jap	Tsou	鄒族	~1980	collected by TW breeders	SRR24831474	SAMN35003917	啟東蒐集系13
UL135	Maolin23	jap	Paiwan, Rukai	排灣族	~1980	collected by TW breeders	SRR24831473	SAMN35003918	茂林黑米23
UL136	Maolin39-1	ind	Paiwan, Rukai	排灣族	~1980	collected by TW breeders	SRR24831472	SAMN35003809	茂林黑米39-1
UL139	Maolin45	ind	Paiwan, Rukai	排灣族	~1980	collected by TW breeders	SRR24831471	SAMN35003810	茂林黑米45
UL140	Hsing-mei1	jap	Tsou	鄒族	~1980	collected by TW breeders	SRR24831469	SAMN35003919	新美蒐集系1
UL141	Hsing-mei2	jap	Tsou	鄒族	~1980	collected by TW breeders	SRR24831468	SAMN35003920	新美蒐集系2
UL142	Hsing-mei5	ind	Tsou	鄒族	~1980	collected by TW breeders	SRR24831467	SAMN35003811	新美蒐集系5
UL143	Hsing-mei9	jap	Tsou	鄒族	~1980	collected by TW breeders	SRR24831466	SAMN35003921	新美蒐集系9
UL144	CSRed	ind	Tsou	鄒族	~1980	collected by TW breeders	SRR24831465	SAMN35003812	茶山紅
UL199	Hualien137	jap	Amis	阿美族	~1980	collected by TW breeders	SRR24831464	SAMN35003922	花蓮蒐集系137
UL202	Hualien133	ind	Amis	阿美族	~1980	collected by TW breeders	SRR24831463	SAMN35003789	花蓮蒐集系133
UL207	Hualien25	jap	Amis	阿美族	~1980	collected by TW breeders	SRR24831462	SAMN35003923	花蓮蒐集系25
UL209	Hualien36	jap	Amis	阿美族	~1980	collected by TW breeders	SRR24831461	SAMN35003924	花蓮蒐集系36
UL211	Hualien4	jap	Amis	阿美族	~1980	collected by TW breeders	SRR24831460	SAMN35003925	花蓮蒐集系4
UL212	Hualien46	jap	Amis	阿美族	~1980	collected by TW breeders	SRR24831458	SAMN35003926	花蓮蒐集系46
UL215	Hualien89	jap	Amis	阿美族	~1980	collected by TW breeders	SRR24831457	SAMN35003927	花蓮蒐集系89
UL217	CD4	jap	Tsou	鄒族	~1980	collected by TW breeders	SRR24831456	SAMN35003928	劉啟東蒐集系4
UL218	Hualien41	jap	Amis	阿美族	~1980	collected by TW breeders	SRR24831455	SAMN35003929	花蓮蒐集系41
UL219	Hualien47	jap	Amis	阿美族	~1980	collected by TW breeders	SRR24831454	SAMN35003930	花蓮蒐集系47
UL220	Hualien129-2	ind	Amis	阿美族	~1980	collected by TW breeders	SRR24831453	SAMN35003813	花蓮蒐集系129-2
UL221	MONTANO	ind	N/A		~1900	from IRRI seed bank	SRR24831452	SAMN35003814
UL222	PERISA	ind	N/A		~1970	from IRRI seed bank	SRR24831451	SAMN35003815
UL223	NANTON 50	jap	Bunun	布農族	~1970	from IRRI seed bank	SRR24831450	SAMN35003931	南投50
UL224	NANTON 53	jap	Bunun	布農族	~1970	from IRRI seed bank	SRR24831449	SAMN35003932	南投53
UL225	NANTON 84	jap	Bunun	布農族	~1970	from IRRI seed bank	SRR24831447	SAMN35003933	南投84
UL226	NANTON 215	ind	Bunun	布農族	~1970	from IRRI seed bank	SRR24831446	SAMN35003816	南投215
UL227	NANTON 242	jap	Bunun	布農族	~1970	from IRRI seed bank	SRR24831445	SAMN35003934	南投242
UL228	NANTON 435	ind	Bunun	布農族	~1970	from IRRI seed bank	SRR24831444	SAMN35003817	南投435
UL229	KUNG SHAN WU SHEN KEN	jap	Amis	阿美族	~1980	from IRRI seed bank	SRR24831443	SAMN35003935	崑山五香梗
UL230	KATUPA AI	jap	Tsou	鄒族	~1970	from IRRI seed bank	SRR24831442	SAMN35003936
UL231	KWAN FU HSIANG NUO	jap	Amis	阿美族	~1970	from IRRI seed bank	SRR24831441	SAMN35003937	光復香糯
UL232	TSUPARAN	ind	N/A		~1900	from IRRI seed bank	SRR24831440	SAMN35003818
UL233	PAGAIYAHAN	ind	N/A		~1900	from IRRI seed bank	SRR24831439	SAMN35003790
UL234	UNNAMED	ind	N/A		~1900	from IRRI seed bank	SRR24831438	SAMN35003819	無名
UL238	TA TAAO	ind	N/A		~1970	from IRRI seed bank	SRR24831434	SAMN35003822
UL239	TANGO NAKETO 11	ind	N/A		~1970	from IRRI seed bank	SRR24831433	SAMN35003823
UL240	HSIANG TSENF TAO	jap	N/A		~1970	from IRRI seed bank	SRR24831623	SAMN35003938	香山稻
UL241	NABESHI	jap	N/A		~1900	from IRRI seed bank	SRR24831611	SAMN35003940

## Sheet: Table S4
Table S4. Morphology of 10 indigenous accessions collected from the Tsou tribe. Subspecies, awn length, awn color, grain color, caryopsis color, glutenous type, seed length, seed width, seed length/width ratio and area (length*width) are listed. (Excel file)
name	sub-species	awn length	awn color	grain color	caryopsis color	glutinous	length (mm)	width (mm)	l/w ratio	area (l x w)
CD1	Jap	long	brown	yellow	red	yes	9.58667	3.7	2.59099	35.4707
CD2	Jap	short	redish brown	redish brown	red	yes	10.2133	3.71667	2.74798	37.9596
CD4	Jap	short	dark purple	yellow	white	yes	7.94333	3.40667	2.3317	27.0603
CD5	Ind	no	N/A	yellow	red	wildtype	8.25	3.23	2.55155	26.675
CD7	Jap	short	redish brown	redish brown	red	yes	7.86333	3.58667	2.19238	28.2032
CD8	Jap	short	brown	brown	red	yes	8.24333	3.58	2.30261	29.5111
CD9	Jap	long	brown	yellow	white	yes	8.97	3.72333	2.40913	33.3983
CD10	Jap	no	N/A	yellow	white	yes	10.03	3.80667	2.63485	38.1809
CD12	Jap	long	brown	brown	red	yes	7.84667	3.54	2.21657	27.7772
CD13	Jap	short	brown	redish brown	red	yes	8.4	3.64667	2.30347	30.632

## Sheet: Table S5
Table S5. Accessions with seed size information. Accessions names, region collected, seed length and seed width are listed.
ID	Name	types	Region collected	width	length	ratio	index
3K001	MUTTU SAMBA::IRGC 36333-1	ind2	Sri Lanka	3	5.7	1.9	17.1
3K002	PODI HEENATI::IRGC 36345-1	aus	Sri Lanka	2.7	7	2.6	18.9
3K006	KALABAIL::IRGC 25877-1	ind2	Bangladesh	3.2	8.2	2.6	26.2
3K007	KALU ILANKALAYAN::IRGC 36270-1	ind2	Sri Lanka	3.2	7.8	2.4	25
3K008	SIPULUT HITAM PENDEK::IRGC 20154-1	ind3	Indonesia	3.3	8.9	2.7	29.4
3K010	MANDASHERPO::IRGC 64913-1	trop2	Bhutan	2.8	8	2.9	22.4
3K011	POKKALI::IRGC 8948-1	ind2	Sri Lanka	3.2	7.9	2.5	25.3
3K012	PANNITHI::IRGC 51049-1	trop1	Sri Lanka	4	9	2.3	36
3K014	MANONGAZATO::IRGC 77876-1	trop1	Madagascar	2.7	8.4	3.1	22.7
3K017	INPONG::IRGC 85524-1	ind3	Lao People's Democratic Republic	2.7	6.7	2.5	18.1
3K021	JON JAN::IRGC 97633-1	indx	Myanmar	3.3	8.3	2.5	27.4
3K024	RAM SALEE KATAKA::IRGC 24014-1	aro	Nepal	3.1	7.8	2.5	24.2
3K025	TUI (KIDAYAN)::IRGC 79058-1	ind3	Philippines	3.2	8.8	2.8	28.2
3K026	VAIKATHARYAN::IRGC 52805-1	ind2	India	3.4	9.1	2.7	30.9
3K030	INDEL::IRGC 17748-2	indx	Indonesia	3.1	9.3	3	28.8
3K031	INDO NO 13030::IRGC 48630-2	indx	Indonesia	2.9	9.6	3.3	27.8
3K032	KUMRI::IRGC 37182-2	indx	Bangladesh	3.1	8	2.6	24.8
3K033	LAI NOK KHA::IRGC 29604-2	ind3	Lao People's Democratic Republic	3.6	8.8	2.4	31.7
3K034	MATI CHAL::IRGC 26399-2	ind2	Bangladesh	3.5	7.9	2.3	27.7
3K036	SIPULUIK ARANG::IRGC 35488-2	ind3	Indonesia	2.8	11.4	4.1	31.9
3K038	PULUT BURUNG::IRGC 71655-1	ind3	Malaysia	2.9	9.5	3.3	27.6
3K039	GLAM::IRGC 47978-2	ind3	Thailand	3.4	10	2.9	34
3K040	NIAW DAM::IRGC 48387-2	ind3	Thailand	3.6	9.6	2.7	34.6
3K041	KALOBONA::IRGC 37478-2	ind2	Bangladesh	3.2	8.6	2.7	27.5
3K042	ALAGUSAMBA::IRGC 8944-2	ind2	Sri Lanka	3.5	8.3	2.4	29.1
3K044	LEUANG MAI::IRGC 66019-2	ind3	Thailand	2.7	9.8	3.6	26.5
3K051	CHAO DO::IRGC 106666-1	indx	Lao People's Democratic Republic	3.2	8.3	2.6	26.6
3K055	ARC 10754::IRGC 12603-1	indx	India	2.5	8.8	3.5	22
3K057	MAE MAI LUD NI::IRGC 66065-1	ind3	Thailand	3.7	8.7	2.4	32.2
3K062	ARC 10905::IRGC 12669-1	indx	India	2.8	8.7	3.1	24.4
3K064	E MOOM::IRGC 64291-1	ind3	Thailand	3.2	8.9	2.8	28.5
3K065	E PLUAK::IRGC 64297-1	ind3	Thailand	3.6	9.8	2.7	35.3
3K068	GOJOT::IRGC 17669-1	ind3	Indonesia	3.2	8.2	2.6	26.2
3K069	HEGAR MANAH::IRGC 17733-1	indx	Indonesia	3	9.5	3.2	28.5
3K073	MAMAS::IRGC 16503-1	ind3	Indonesia	2.9	8.5	2.9	24.7
3K074	MANGSUR::IRGC 18187-1	ind3	Indonesia	2.6	8.8	3.4	22.9
3K078	EA DAM HANG DOK::IRGC 29698-2	ind3	Lao People's Democratic Republic	3.5	10.4	3	36.4
3K081	KEO LAI::IRGC 29969-2	ind3	Lao People's Democratic Republic	3.5	10.3	2.9	36.1
3K084	MAK EA NAM::IRGC 30131-2	ind3	Lao People's Democratic Republic	3.6	8.5	2.4	30.6
3K086	PHOU SAO LEUM NYANG::IRGC 11570-2	indx	Lao People's Democratic Republic	3.4	9.9	2.9	33.7
3K088	KHAN THAI DO::IRGC 12990-1	ind3	Lao People's Democratic Republic	3.8	9.9	2.6	37.6
3K090	INANUPAN::IRGC 44461-2	ind2	Philippines	3.7	8	2.2	29.6
3K091	MAK NAM::IRGC 12940-2	ind3	Lao People's Democratic Republic	3.9	8	2.1	31.2
3K092	NARUN::IRGC 18320-2	ind3	Indonesia	2.7	9.8	3.6	26.5
3K093	RANDAH SASAK::IRGC 13652-2	ind3	Indonesia	2.8	8.8	3.1	24.6
3K094	CULALANSI::IRGC 53109-1	indx	Philippines	2.5	8.7	3.5	21.8
3K096	CAMPENA::IRGC 5452-2	indx	Philippines	2.7	9.6	3.6	25.9
3K099	571::IRGC 48493-1	japx	Thailand	3.3	9.9	3	32.7
3K100	BIKYAT::IRGC 26276-1	trop1	Philippines	3.5	9.3	2.7	32.6
3K101	CHIH SHEN LI::IRGC 1306-1	ind1A	China	2.8	8.3	3	23.2
3K102	CHUNG YI::IRGC 1427-1	temp	China	3.6	7.4	2.1	26.6
3K103	KETAN MENAH::IRGC 48733-1	trop1	Indonesia	3	9.8	3.3	29.4
3K104	KORASISI::IRGC 5285-1	ind1A	Philippines	3.4	8.5	2.5	28.9
3K105	NAM ROO::IRGC 66996-1	trop2	Thailand	2.9	9	3.1	26.1
3K106	KHAU TRA BONG::IRGC 78342-1	trop2	Viet Nam	3.9	9.1	2.3	35.5
3K108	TRES MESES::IRGC 6464-1	trop1	Brazil	3.3	9.1	2.8	30
3K109	LEKATAN::IRGC 71554-1	trop1	Malaysia	2.5	9.5	3.8	23.8
3K110	PAI YI PING::IRGC 1368-1	ind1A	China	3	8.1	2.7	24.3
3K111	E WAWNG::IRGC 71140-1	trop2	Thailand	3.1	9.9	3.2	30.7
3K112	KONTOL 86::IRGC 14281-1	ind3	Malaysia	2.8	7.9	2.8	22.1
3K113	DAM::IRGC 23710-1	trop2	Thailand	2.9	7.7	2.7	22.3
3K114	LASAT PUTIH::IRGC 44076-1	trop1	Malaysia	3.6	8.2	2.3	29.5
3K116	YAHNG LEU::IRGC 78279-1	trop2	Thailand	3	9	3	27
3K117	WANGKOD::IRGC 71646-1	ind2	Malaysia	3.7	9.5	2.6	35.2
3K118	BUE GA WA::IRGC 60824-1	trop2	Thailand	2.6	5.4	2.1	14
3K119	DAGPA MRAS::IRGC 62166-1	trop2	Bhutan	3.1	8.4	2.7	26
3K120	INITLOG DALAG::IRGC 67436-1	trop1	Philippines	3.2	5.7	1.8	18.2
3K121	TSIVIMBININA::IRGC 69890-1	trop1	Madagascar	4.1	8.5	2.1	34.9
3K122	19::IRGC 70786-1	ind2	India	3.3	7.1	2.2	23.4
3K123	BIJULI BATI::IRGC 58917-1	ind2	Nepal	3.3	8.6	2.6	28.4
3K124	DAYRON MARANGRAS::IRGC 75209-1	trop1	Philippines	2.7	7.6	2.8	20.5
3K125	KAHATAWEE::IRGC 12004-1	ind2	Sri Lanka	3.3	8.3	2.5	27.4
3K126	KETAN PAPAH AREN::IRGC 16467-1	trop1	Indonesia	3.3	9.8	3	32.3
3K127	KETAN PELERN::IRGC 16468-1	trop1	Indonesia	3.3	9.5	2.9	31.4
3K128	KUSUM KATIKI::IRGC 59099-1	ind2	Nepal	3.1	8.4	2.7	26
3K131	MARAMAY::IRGC 82628-1	ind3	Philippines	2.4	7.3	3	17.5
3K132	MATIANG::IRGC 18220-1	ind3	Indonesia	3.2	8.5	2.7	27.2
3K133	MENDUNGAN::IRGC 18245-1	trop1	Indonesia	3	8.6	2.9	25.8
3K134	MURUNGA::IRGC 15428-1	ind2	Sri Lanka	3	8.1	2.7	24.3
3K135	NAPDAI::IRGC 52009-1	ind2	India	3.2	8.3	2.6	26.6
3K136	NCS 102::IRGC 51854-1	ind2	India	2.9	8.2	2.8	23.8
3K137	NIAW KHAMIN::IRGC 40222-1	trop1	Thailand	2.9	10.6	3.7	30.7
3K138	PADI BURIH::IRGC 44081-1	trop1	Malaysia	3.8	8	2.1	30.4
3K139	PADI JALAI BELA::IRGC 44084-1	trop1	Malaysia	3.1	9.8	3.2	30.4
3K140	PARAY KINARABAW::IRGC 8083-1	trop1	Philippines	2.8	8.5	3	23.8
3K141	PILIT TAPUL::IRGC 26887-1	trop1	Philippines	3.3	7.5	2.3	24.8
3K142	P PEY SIQAT::IRGC 8129-1	trop1	Philippines	3	8.5	2.8	25.5
3K143	QI GU::IRGC 77381-1	ind1A	China	3	8.4	2.8	25.2
3K144	SABORAMANDALOAFO::IRGC 69875-1	ind2	Madagascar	2.8	10.2	3.6	28.6
3K145	SAMBA::IRGC 11993-1	ind2	Sri Lanka	3.4	8.8	2.6	29.9
3K146	SELHI::IRGC 52760-1	ind2	India	3.2	8	2.5	25.6
3K147	SIPON::IRGC 16570-1	trop1	Indonesia	3.2	6.9	2.2	22.1
3K148	SLOBOK::IRGC 16571-1	trop1	Indonesia	3.3	8.7	2.6	28.7
3K149	SUDU KARAYAL::IRGC 15348-1	ind2	Sri Lanka	3.1	8.7	2.8	27
3K150	VARIRANGAHY::IRGC 69897-1	trop1	Madagascar	3.5	8.2	2.3	28.7
3K151	YADU BARA::IRGC 86912-1	indx	Bhutan	1.8	6.5	3.6	11.7
3K152	YAH YAW::IRGC 61359-1	trop1	Thailand	2.5	8.8	3.5	22
3K153	ZHAO DAN AI::IRGC 77422-1	ind1A	China	3.1	7.9	2.5	24.5
3K154	ZINYA KOLAMBA::IRGC 52402-1	ind2	India	2.4	8.1	3.4	19.4
3K155	ASE BAKKA LOMPO::IRGC 26988-2	ind3	Indonesia	3.1	7.8	2.5	24.2
3K156	BADAL::IRGC 26290-2	ind2	Bangladesh	3.3	8.2	2.5	27.1
3K157	DAMNOEUB KHSE SAUT::IRGC 22819-2	ind3	Cambodia	2.4	10	4.2	24
3K158	DAMNOEUB THPOIL HING::IRGC 22856-2	ind3	Cambodia	3.1	8.7	2.8	27
3K159	DUDA MONOR::IRGC 26335-2	ind2	Bangladesh	2.8	8.2	2.9	23
3K160	GANDAMANA::IRGC 17593-2	trop1	Indonesia	3.1	8.3	2.7	25.7
3K161	HAJI HARUN 38::IRGC 13827-2	ind3	Malaysia	2.9	9.5	3.3	27.6
3K162	KALA DIGHA::IRGC 26367-2	ind2	Bangladesh	3.3	8.3	2.5	27.4
3K163	KAMRANGA::IRGC 26373-2	ind2	Bangladesh	3.1	8.1	2.6	25.1
3K164	KREM KRAHAM::IRGC 22981-2	ind3	Cambodia	2.8	8.3	3	23.2
3K166	PUTUS TOLO::IRGC 25636-2	trop1	Indonesia	3.3	8.1	2.5	26.7
3K167	SIKEP BATU::IRGC 13514-2	trop1	Indonesia	3.4	8.2	2.4	27.9
3K168	TOLIL 14::IRGC 13836-2	ind3	Malaysia	2.8	9.8	3.5	27.4
3K169	BINARITOS::IRGC 19391-1	trop1	Philippines	2.9	8.7	3	25.2
3K170	BUAGKOG::IRGC 74318-1	trop1	Philippines	2.9	9.3	3.2	27
3K171	BUENG MONG LENG WE::IRGC 71088-1	trop2	Thailand	3.1	10	3.2	31
3K172	BUSIYETAN::IRGC 11205-1	trop1	Philippines	4	9	2.3	36
3K173	CHABLI CHABOL GLANG::IRGC 23706-1	trop2	Thailand	3.6	9.8	2.7	35.3
3K174	CHATAO::IRGC 50456-1	trop1	Brazil	3.5	7.7	2.2	27
3K175	GINATOS::IRGC 26876-1	trop1	Philippines	3.6	7.9	2.2	28.4
3K176	IKOGAN::IRGC 19412-1	trop1	Philippines	3.5	7.7	2.2	27
3K177	KHAO' SIM::IRGC 24094-1	ind3	Thailand	2.5	9.6	3.8	24
3K178	LENKIBE-N::IRGC 11216-1	trop1	Philippines	3.7	9.5	2.6	35.2
3K179	MLATI::IRGC 18278-1	trop1	Indonesia	3.4	8.3	2.4	28.2
3K180	MUNJI::IRGC 70928-1	temp	Pakistan	3.3	7.3	2.2	24.1
3K181	PADI ADONG DUMARAT::IRGC 14356-1	trop1	Malaysia	3.1	9.2	3	28.5
3K182	PADI DARAWAL::IRGC 14373-1	trop1	Malaysia	3.1	9.6	3.1	29.8
3K183	PHIT CHZK::IRGC 73317-1	trop2	Thailand	3.2	8.9	2.8	28.5
3K184	PULUT SELEMYAM::IRGC 71820-1	ind3	Malaysia	3	10.1	3.4	30.3
3K185	QINOGNAS::IRGC 8135-1	trop1	Philippines	3.8	9.4	2.5	35.7
3K186	RANGKAI KEPEL::IRGC 25640-1	trop1	Indonesia	2.8	9	3.2	25.2
3K187	RENIK BELITI::IRGC 25648-1	trop1	Indonesia	2.3	9.4	4.1	21.6
3K188	ROJON'NY NTAOLO::IRGC 69410-1	ind2	Madagascar	2.9	9.2	3.2	26.7
3K189	SERAJU::IRGC 16565-1	trop1	Indonesia	2.9	7.5	2.6	21.8
3K190	SITABO TABO::IRGC 25798-1	trop1	Indonesia	3.1	8.9	2.9	27.6
3K191	TINOLDO MARANGRAS::IRGC 81758-1	trop1	Philippines	2.6	9.9	3.8	25.7
3K192	IREQUIN::IRGC 44476-2	temp	Philippines	3.6	8	2.2	28.8
3K193	AE WAWNG POO DOO::IRGC 71007-1	trop2	Thailand	2.8	9.3	3.3	26
3K194	KHAO' DAENG HAWM::IRGC 71001-1	trop2	Thailand	3.8	11.3	3	42.9
3K196	SESAT JADI::IRGC 71834-1	ind3	Malaysia	2.4	7.8	3.3	18.7
3K197	SUNGKAI::IRGC 25812-1	trop1	Indonesia	2.7	8.9	3.3	24
3K198	TON TIA GUAY NU::IRGC 71467-1	trop2	Thailand	3.2	9.2	2.9	29.4
3K199	MELIK::IRGC 18238-2	trop1	Indonesia	3.6	7.8	2.2	28.1
3K200	SEREH::IRGC 13732-2	trop1	Indonesia	3.3	8.9	2.7	29.4
3K201	BOO MAE::IRGC 71058-1	ind3	Thailand	2.5	8.2	3.3	20.5
3K203	DAMNOEUB POR HING::IRGC 22841-2	ind3	Cambodia	3.1	8.6	2.8	26.7
3K204	SING SAI::IRGC 71442-2	trop2	Thailand	3.2	10.3	3.2	33
3K205	DUNA AL::IRGC 71842-1	trop1	Philippines	4.1	9.5	2.3	39
3K206	BHONDU PAREWA::IRGC 70802-3	ind2	India	3.1	9.1	2.9	28.2
3K207	BONGOLON::IRGC 13094-3	ind3	Malaysia	3	7.2	2.4	21.6
3K208	CADUNG SO BLOC 1::IRGC 30231-3	ind3	Viet Nam	3.2	8.4	2.6	26.9
3K209	KHSAY VENG::IRGC 22915-3	ind3	Cambodia	2.5	9.1	3.6	22.8
3K210	PADI TIMBUN::IRGC 13451-3	ind3	Malaysia	2.7	8.2	3	22.1
3K211	SOC NAU (BIEN THE)::IRGC 32074-3	ind3	Viet Nam	3	8	2.7	24
3K212	TJOKRON::IRGC 16653-2	trop1	Indonesia	3.3	9.2	2.8	30.4
3K213	MANUS::IRGC 71570-1	ind3	Malaysia	2.9	9.7	3.3	28.1
3K214	KOLA MUCHI::IRGC 26384-2	ind2	Bangladesh	3.4	8.2	2.4	27.9
3K215	MOONOR::IRGC 59136-1	ind2	Nepal	2.9	8.6	3	24.9
3K216	BLAU BLA::IRGC 78460-1	temp	Viet Nam	3.7	8.7	2.4	32.2
3K217	BLICCA::IRGC 47151-1	trop1	Philippines	3.8	8.3	2.2	31.5
3K218	BURI BURING::IRGC 64174-1	trop1	Philippines	2.6	7.4	2.8	19.2
3K219	CANLUBANG::IRGC 69816-1	japx	Philippines	3.7	7.9	2.1	29.2
3K220	DEO KITAN::IRGC 47197-1	trop1	Philippines	3.4	8.4	2.5	28.6
3K221	INAPORAONAN::IRGC 19418-1	trop1	Philippines	2.9	7.9	2.7	22.9
3K222	KALAGNON::IRGC 30335-1	indx	Philippines	3.3	7.4	2.2	24.4
3K223	KASIGNAYAN::IRGC 82788-1	trop1	Philippines	2.8	7.4	2.6	20.7
3K224	LOBANG (WHITE)::IRGC 44548-2	indx	Philippines	3.8	9.1	2.4	34.6
3K225	MACAPAGAL::IRGC 52927-1	ind3	Philippines	2.9	10.1	3.5	29.3
3K226	MINATANDA::IRGC 74613-1	trop1	Philippines	3.6	8.6	2.4	31
3K227	ONOY::IRGC 55418-1	trop1	Philippines	3.1	9.1	2.9	28.2
3K228	MINDANAO::IRGC 44642-2	ind3	Philippines	3.2	8.6	2.7	27.5
IRIS_313-10007	GARURA::IRGC 64111-1	indx	Nepal	3.3	9	2.7	29.7
IRIS_313-10010	LALKA (LAL DHAN)::IRGC 64946-1	ind2	Fiji	3.1	8	2.6	24.8
IRIS_313-10016	BOHOTO BALOOCHESTAN::IRGC 66237-1	indx	Iran	2.6	10	3.8	26
IRIS_313-10020	HODARAWALA::IRGC 67631-1	aus	Sri Lanka	2.7	7.9	2.9	21.3
IRIS_313-10041	BOTOHAVANA MENA::IRGC 69349-1	trop1	Madagascar	3.6	9	2.5	32.4
IRIS_313-10045	BANTA TIMA::IRGC 69474-1	indx	Gambia	2.7	9.3	3.4	25.1
IRIS_313-10046	CHAMA (DWARF)::IRGC 69487-1	ind1B	Zambia	2.6	8.5	3.3	22.1
IRIS_313-10047	EX MARABA GURUKU::IRGC 69582-1	ind1A	Nigeria	3.2	8.1	2.5	25.9
IRIS_313-10048	MOVE (MOKOLE)::IRGC 69739-1	indx	Benin	3.4	10.6	3.1	36
IRIS_313-10050	TSIMATAHOPAOSA::IRGC 69884-1	indx	Madagascar	2.5	10.1	4	25.3
IRIS_313-10065	JAERAERYUKDO::IRGC 73053-1	trop1	Korea, Republic of	3.6	8.5	2.4	30.6
IRIS_313-10067	JEONBUKGUNGWEONNA::IRGC 73055-1	trop1	Korea, Republic of	3.5	9.3	2.7	32.6
IRIS_313-10071	CHIYODA WASE::IRGC 74467-1	trop1	Japan	3.2	8.4	2.6	26.9
IRIS_313-10073	OWARI MOCHI::IRGC 74513-1	trop1	Japan	3.4	8.3	2.4	28.2
IRIS_313-10074	RIKU AIKOKU::IRGC 74514-1	trop1	Japan	3.1	7.8	2.5	24.2
IRIS_313-10075	SANGOKU::IRGC 74518-1	trop1	Japan	3.5	8.5	2.4	29.8
IRIS_313-10076	SHINA MOCHI::IRGC 74523-1	trop1	Japan	3.8	8.1	2.1	30.8
IRIS_313-10077	TAMASHIRO HIKARI::IRGC 74534-1	indx	Japan	3.5	7.9	2.3	27.7
IRIS_313-10078	YOSHINO MOCHI::IRGC 74550-1	trop1	Japan	3.8	9.1	2.4	34.6
IRIS_313-10079	DANGO MOCHI::IRGC 74551-1	trop1	Japan	3.6	9.4	2.6	33.8
IRIS_313-10080	HIRAKAWA OKUTE::IRGC 74554-1	trop1	Japan	3.5	8.4	2.4	29.4
IRIS_313-10082	KYUUSHUU::IRGC 74558-1	trop1	Japan	3	8	2.7	24
IRIS_313-10092	CHALBYEO::IRGC 77639-1	temp	Korea, Republic of	3.1	7.2	2.3	22.3
IRIS_313-10093	CHEONJUDO::IRGC 77644-1	temp	Korea, Republic of	3.1	6.6	2.1	20.5
IRIS_313-10094	GAWICHAL::IRGC 77653-1	trop1	Korea, Republic of	3.3	8.5	2.6	28.1
IRIS_313-10096	JOKJEBICHAL::IRGC 77663-1	japx	Korea, Republic of	3.1	7.8	2.5	24.2
IRIS_313-10097	MAEKJO::IRGC 77666-1	temp	Korea, Republic of	3.5	7.1	2	24.9
IRIS_313-10109	EX EBOKOZURU::IRGC 79912-1	ind3	Nigeria	3.1	10.2	3.3	31.6
IRIS_313-10428	SERAUP 50::IRGC 14-1	ind3	Malaysia	3	7.4	2.5	22.2
IRIS_313-10450	CHAN KU::IRGC 1069-1	ind1A	China	3.1	7.6	2.5	23.6
IRIS_313-10453	LU TAO 2::IRGC 1175-1	japx	China	3.3	7	2.1	23.1
IRIS_313-10489	MOROPOTOL::IRGC 3909-1	trop1	Philippines	3.6	7.3	2	26.3
IRIS_313-10510	MAGSIING::IRGC 5211-1	indx	Philippines	2.6	7.6	2.9	19.8
IRIS_313-10511	MACAN SAPAC::IRGC 5212-2	ind3	Philippines	2.6	9.2	3.5	23.9
IRIS_313-10545	KARIA::IRGC 6702-1	aus	N/A	3.5	8.8	2.5	30.8
IRIS_313-10577	IFUGAO RICE::IRGC 8052-1	trop1	Philippines	3.8	9.6	2.5	36.5
IRIS_313-10578	PARAY QIKUG KABAYUH::IRGC 8059-1	trop1	Philippines	3.6	9	2.5	32.4
IRIS_313-10609	MATHOLUWA::IRGC 8901-1	indx	Sri Lanka	3.2	8.2	2.6	26.2
IRIS_313-10628	O. SATIVA::IRGC 10164-2	ind2	India	2.6	8.9	3.4	23.1
IRIS_313-10650	NAHNG PRAYAH 132::IRGC 11470-1	ind3	Thailand	2.6	9.6	3.7	25
IRIS_313-10652	CHAO PEUAK DENG::IRGC 11602-1	ind3	Lao People's Democratic Republic	2.9	9.6	3.3	27.8
IRIS_313-10673	ARC 10843::IRGC 12653-1	aus	India	2.8	7.7	2.8	21.6
IRIS_313-10676	ARC 10916::IRGC 12673-1	admix	India	3.1	9.5	3.1	29.5
IRIS_313-10679	KHAI DO::IRGC 12903-2	trop2	Lao People's Democratic Republic	4	9.7	2.4	38.8
IRIS_313-10682	PA KHENG::IRGC 12996-1	ind3	Lao People's Democratic Republic	3.7	8.6	2.3	31.8
IRIS_313-10683	NGAN TIA::IRGC 13010-1	ind3	Lao People's Democratic Republic	3.5	8.4	2.4	29.4
IRIS_313-10687	PADI PULUT::IRGC 13444-1	ind3	Malaysia	2.9	9.7	3.3	28.1
IRIS_313-10690	LARONDJAWI::IRGC 13571-2	ind3	Indonesia	2.7	8.7	3.2	23.5
IRIS_313-10697	SIAM ER 16::IRGC 13910-2	ind3	Malaysia	2.5	9.4	3.8	23.5
IRIS_313-10698	RADIN GOI::IRGC 13969-1	ind3	Malaysia	2.8	8.5	3	23.8
IRIS_313-10699	BUJANG::IRGC 14040-1	ind3	Malaysia	3.2	8.5	2.7	27.2
IRIS_313-10700	CHANTEK 145::IRGC 14045-1	ind3	Malaysia	3	8.7	2.9	26.1
IRIS_313-10701	RADIN EBOS 35::IRGC 14204-1	ind3	Malaysia	2.7	8	3	21.6
IRIS_313-10702	JAROM EMAS::IRGC 14272-1	ind3	Malaysia	2.2	9.6	4.4	21.1
IRIS_313-10705	PADI PULOT MELAYANG::IRGC 14391-2	indx	Malaysia	3.6	10.1	2.8	36.4
IRIS_313-10706	ANAK CHINA::IRGC 14479-1	ind3	Malaysia	3.1	8	2.6	24.8
IRIS_313-10707	ANAK DIDEK::IRGC 14491-1	ind3	Malaysia	2.8	7.7	2.8	21.6
IRIS_313-10710	PINDE GOGO WIERIE::IRGC 14795-2	trop1	Surinam	3.4	8	2.4	27.2
IRIS_313-10717	PERIYA VELLAI::IRGC 15475-1	ind2	Sri Lanka	3.6	8.9	2.5	32
IRIS_313-10718	KARUTHA SEENATI::IRGC 15515-2	aus	Sri Lanka	2.9	7.3	2.5	21.2
IRIS_313-10719	VELLAI KOLOMBAN::IRGC 15517-1	ind2	Sri Lanka	3.3	8	2.4	26.4
IRIS_313-10720	HEENDIKWEE::IRGC 15587-2	indx	Sri Lanka	2.7	9	3.3	24.3
IRIS_313-10721	HALSUDU HEENATI::IRGC 15599-1	ind2	Sri Lanka	3.2	7.7	2.4	24.6
IRIS_313-10722	GODAWEL::IRGC 15750-1	trop1	Sri Lanka	3.2	6.8	2.1	21.8
IRIS_313-10738	ANDEL WELUT::IRGC 16339-1	admix	Indonesia	3.2	7.4	2.3	23.7
IRIS_313-10739	GOGO::IRGC 16418-1	indx	Indonesia	3.2	8.4	2.6	26.9
IRIS_313-10746	TJEMPO KREMBUNG::IRGC 16603-1	trop1	Indonesia	3.7	8.8	2.4	32.6
IRIS_313-10748	LUA DUC::IRGC 16718-1	indx	Viet Nam	2.6	8.6	3.3	22.4
IRIS_313-10749	MINH SOC (CAMBODIA)::IRGC 16731-2	ind3	Viet Nam	2.6	8.3	3.2	21.6
IRIS_313-10750	TRANG LUA::IRGC 16781-3	ind3	Viet Nam	3.2	8.8	2.8	28.2
IRIS_313-10751	LUA CHUM::IRGC 16840-1	indx	Viet Nam	3.1	7.8	2.5	24.2
IRIS_313-10755	NEP BA BONG TO::IRGC 17005-2	ind3	Viet Nam	2.8	9.6	3.4	26.9
IRIS_313-10758	AEN METAN::IRGC 17142-1	trop1	Indonesia	3.9	9.5	2.4	37.1
IRIS_313-10759	ANDEL::IRGC 17153-2	trop1	Indonesia	3.3	9.6	2.9	31.7
IRIS_313-10760	ATJEH::IRGC 17174-1	ind3	Indonesia	3.1	8.4	2.7	26
IRIS_313-10761	BALIK SEMAH::IRGC 17201-2	trop1	Indonesia	3.4	8.5	2.5	28.9
IRIS_313-10762	BANDI::IRGC 17214-1	ind3	Indonesia	3	8.4	2.8	25.2
IRIS_313-10765	CERE KAWAT::IRGC 17401-2	trop1	Indonesia	3.4	8.5	2.5	28.9
IRIS_313-10766	DJALAWARA::IRGC 17471-1	trop1	Indonesia	3.5	7.8	2.2	27.3
IRIS_313-10767	DJANGGOT::IRGC 17491-2	trop1	Indonesia	3.2	8	2.5	25.6
IRIS_313-10768	GADABUNG (GUNDIL)::IRGC 17569-2	ind3	Indonesia	2.8	8.8	3.1	24.6
IRIS_313-10769	GAJA BARU::IRGC 17586-1	indx	Indonesia	2.8	9.4	3.4	26.3
IRIS_313-10771	GOGO RAJAPAN::IRGC 17666-2	trop1	Indonesia	3.4	8.1	2.4	27.5
IRIS_313-10773	HAWARA DJEDAH::IRGC 17728-1	trop1	Indonesia	3.5	9.3	2.7	32.6
IRIS_313-10776	KABADOKA::IRGC 17775-2	trop1	Indonesia	3.6	8.3	2.3	29.9
IRIS_313-10777	KAMAS::IRGC 17785-1	ind3	Indonesia	3	7.7	2.6	23.1
IRIS_313-10778	KENTJANA MAHANG::IRGC 17818-1	ind3	Indonesia	2.8	7.9	2.8	22.1
IRIS_313-10779	KERAN DUKUH::IRGC 17822-2	ind3	Indonesia	2.3	9.5	4.1	21.9
IRIS_313-10780	KETAN LALER::IRGC 17897-1	trop1	Indonesia	3.2	8.6	2.7	27.5
IRIS_313-10781	KETAN MLANTING::IRGC 17916-1	trop1	Indonesia	3.4	9.8	2.9	33.3
IRIS_313-10782	KETAN NARIS::IRGC 17925-2	ind3	Indonesia	3.1	9.7	3.1	30.1
IRIS_313-10783	KETAN OSOG::IRGC 17929-1	trop1	Indonesia	3.3	8.9	2.7	29.4
IRIS_313-10784	KETAN SAPI::IRGC 17954-2	trop1	Indonesia	3.2	9.6	3	30.7
IRIS_313-10785	KETAN SLAWI::IRGC 17963-1	trop1	Indonesia	3.6	9.9	2.8	35.6
IRIS_313-10786	KETAN URANG::IRGC 17980-1	ind3	Indonesia	3.3	9.4	2.8	31
IRIS_313-10787	KWATIK PUTIH::IRGC 18053-1	ind3	Indonesia	2.7	8.8	3.3	23.8
IRIS_313-10788	LEMUNGSIR::IRGC 18116-3	trop1	Indonesia	3.2	8.5	2.7	27.2
IRIS_313-10789	LENGGANG GENUK BULU::IRGC 18119-1	trop1	Indonesia	3.1	9.6	3.1	29.8
IRIS_313-10790	LOLAWAJI::IRGC 18131-1	trop1	Indonesia	3.3	9.5	2.9	31.4
IRIS_313-10796	MOLOG::IRGC 18282-1	trop1	Indonesia	3.2	9.2	2.9	29.4
IRIS_313-10798	NOGO BELE 2::IRGC 18328-2	trop1	Indonesia	3.5	6.9	2	24.2
IRIS_313-10799	PAE ONGGA::IRGC 18418-1	trop1	Indonesia	3.8	8.6	2.3	32.7
IRIS_313-10800	PALOTAN MELATI::IRGC 18426-2	trop1	Indonesia	2.7	10.1	3.7	27.3
IRIS_313-10801	PARE BUWUN::IRGC 18456-2	trop1	Indonesia	3.2	8.9	2.8	28.5
IRIS_313-10802	PEUTEUJ::IRGC 18484-1	trop1	Indonesia	3.7	7.8	2.1	28.9
IRIS_313-10803	PLAMPEYAN::IRGC 18494-1	trop1	Indonesia	3.3	8.4	2.5	27.7
IRIS_313-10804	PUAK::IRGC 18512-3	ind3	Indonesia	2.1	7.8	3.7	16.4
IRIS_313-10805	PULO::IRGC 18519-1	trop1	Indonesia	3.4	8.3	2.4	28.2
IRIS_313-10806	RADEN DJAWA (GUNDIL)::IRGC 18558-3	ind3	Indonesia	2.8	8.9	3.2	24.9
IRIS_313-10807	RANDA KUNING::IRGC 18595-1	ind3	Indonesia	2.7	8.6	3.2	23.2
IRIS_313-10808	RANTE::IRGC 18608-2	trop1	Indonesia	3.4	9.2	2.7	31.3
IRIS_313-10809	SAMPANG KUNING::IRGC 18678-2	trop1	Indonesia	3.5	8.2	2.3	28.7
IRIS_313-10810	SEGON BENGGALA::IRGC 18724-3	ind3	Indonesia	3.3	9.6	2.9	31.7
IRIS_313-10811	SEMPOR::IRGC 18761-2	indx	Indonesia	3.4	8.7	2.6	29.6
IRIS_313-10812	SERUNEN::IRGC 18789-3	ind3	Indonesia	2.8	8.2	2.9	23
IRIS_313-10813	SIAM BARABAI::IRGC 18800-2	ind3	Indonesia	2	8.6	4.3	17.2
IRIS_313-10814	SIBORAS::IRGC 18816-2	ind3	Indonesia	2.6	9.6	3.7	25
IRIS_313-10815	SIDJANGGUK::IRGC 18826-2	trop1	Indonesia	3.3	8.3	2.5	27.4
IRIS_313-10816	SIDJERO GUNDIL::IRGC 18829-2	trop1	Indonesia	3.6	8.5	2.4	30.6
IRIS_313-10817	SLAMET::IRGC 18900-3	trop1	Indonesia	3.3	8.5	2.6	28.1
IRIS_313-10818	TJEMPO PENDEK UNTUNG::IRGC 19055-2	ind3	Indonesia	2.7	7.9	2.9	21.3
IRIS_313-10819	TJERE ENER::IRGC 19103-1	ind3	Indonesia	3	7.6	2.5	22.8
IRIS_313-10820	TJERE MANGGA::IRGC 19116-2	ind3	Indonesia	3.1	8.5	2.7	26.4
IRIS_313-10821	TJ PERAK::IRGC 19141-1	ind3	Indonesia	3	8.4	2.8	25.2
IRIS_313-10822	UNGGAS::IRGC 19176-2	ind3	Indonesia	3.2	6.6	2.1	21.1
IRIS_313-10823	UTRI DELI::IRGC 19182-1	ind3	Indonesia	2.9	7.6	2.6	22
IRIS_313-10824	HOING CANTEL::IRGC 19282-2	ind3	Indonesia	2.7	9.3	3.4	25.1
IRIS_313-10829	INAMBOG::IRGC 19415-1	trop1	Philippines	3.1	8.2	2.6	25.4
IRIS_313-10831	MALANDI 2::IRGC 19454-2	trop1	Philippines	2.6	7.3	2.8	19
IRIS_313-10832	MALASAY::IRGC 19456-1	trop1	Philippines	3.7	10	2.7	37
IRIS_313-10837	BACK KYUNG ZO::IRGC 19698-2	temp	Korea, Republic of	3.4	6.9	2	23.5
IRIS_313-10838	SSAL BYEO::IRGC 19867-2	temp	Korea, Republic of	3.1	6.3	2	19.5
IRIS_313-10839	TAE GU NA::IRGC 19875-2	temp	Korea, Republic of	3.4	6.6	1.9	22.4
IRIS_313-10840	YE ZO::IRGC 19888-1	temp	Korea, Republic of	3.3	6.6	2	21.8
IRIS_313-10841	KETAN NANGKA::IRGC 19961-2	trop1	Indonesia	3.6	9.5	2.6	34.2
IRIS_313-10842	LUBUK LINGGAU::IRGC 20000-2	ind3	Indonesia	2.9	7.2	2.5	20.9
IRIS_313-10844	INDO NO 7505::IRGC 20162-2	ind3	Indonesia	3	7.7	2.6	23.1
IRIS_313-10898	ANG KANG K P::IRGC 22716-2	ind3	Cambodia	2.6	8.3	3.2	21.6
IRIS_313-10905	KUOL DAUN THNONG::IRGC 22986-1	ind3	Cambodia	2.7	8.2	3	22.1
IRIS_313-10906	LUA NEP 4416::IRGC 23006-1	ind3	Cambodia	2.5	8.6	3.4	21.5
IRIS_313-10907	MARECH S V R::IRGC 23011-2	ind3	Cambodia	2.9	6.5	2.2	18.9
IRIS_313-10908	MOROM::IRGC 23016-2	ind3	Cambodia	2.7	8.6	3.2	23.2
IRIS_313-10910	NEANG MAC::IRGC 23071-3	ind3	Cambodia	2.5	7.7	3.1	19.3
IRIS_313-10912	NEANG SAATH K 45::IRGC 23109-2	ind3	Cambodia	2.9	8.6	3	24.9
IRIS_313-10913	PHAT PRORMOL::IRGC 23143-1	ind3	Cambodia	2.7	8.3	3.1	22.4
IRIS_313-10915	PHCAR SLA KI::IRGC 23169-2	ind3	Cambodia	2.5	8.5	3.4	21.3
IRIS_313-10916	SRAU SLAP::IRGC 23267-2	temp	Cambodia	2.7	8.2	3	22.1
IRIS_313-10917	T Q QI HAYUQBABA::IRGC 23318-1	indx	Philippines	3.9	9.5	2.4	37.1
IRIS_313-10918	T Q QI QINYUHAYUHA::IRGC 23342-3	trop1	Philippines	3.9	8.7	2.2	33.9
IRIS_313-10919	PINIDWA QAN QIPUGO PINGKITAN::IRGC 23359-1	trop1	Philippines	3.1	8.9	2.9	27.6
IRIS_313-10920	PINIDWA QAN QIPUGO QELEK::IRGC 23360-1	trop1	Philippines	3.1	8.6	2.8	26.7
IRIS_313-10924	ATH HAGARI JARAHAN PADDY::IRGC 23796-1	indx	Nepal	2.8	9.2	3.3	25.8
IRIS_313-10925	KAMULI::IRGC 23928-1	aus	Nepal	2.9	8.8	3	25.5
IRIS_313-10927	SUGA PANKHA::IRGC 24054-1	aus	Nepal	3.4	8.8	2.6	29.9
IRIS_313-10931	PAKWALAN::IRGC 24156-1	trop1	Philippines	3.7	8.2	2.2	30.3
IRIS_313-10937	PULUT WAJIT::IRGC 24624-3	ind3	Indonesia	3.4	7.8	2.3	26.5
IRIS_313-10938	SIGUPAI::IRGC 24642-2	ind3	Indonesia	2.7	8.1	3	21.9
IRIS_313-10940	SITANDANG::IRGC 24681-1	ind3	Indonesia	3.2	8.3	2.6	26.6
IRIS_313-10942	BANDANG BUNGKUAKLAN::IRGC 24697-2	ind3	Indonesia	2.9	8.9	3.1	25.8
IRIS_313-10943	PADI BENOT::IRGC 24757-2	ind3	Indonesia	2.9	7.7	2.7	22.3
IRIS_313-10944	SIPULUT SUBANG::IRGC 24824-2	ind3	Indonesia	3.1	8.8	2.8	27.3
IRIS_313-10950	ASE PULU BOLONG::IRGC 25171-1	trop1	Indonesia	3.3	8.5	2.6	28.1
IRIS_313-10951	JENDA ABANG::IRGC 25413-2	ind3	Indonesia	2.4	8.4	3.5	20.2
IRIS_313-10952	KILANG MEDU::IRGC 25442-1	trop1	Indonesia	2.9	7.9	2.7	22.9
IRIS_313-10953	PADI ABUNG KUNING::IRGC 25469-1	trop1	Indonesia	2.9	8.6	3	24.9
IRIS_313-10954	PADI GRUNDUL 1::IRGC 25493-1	ind3	Indonesia	3.2	8.4	2.6	26.9
IRIS_313-10955	PADI PUYUH::IRGC 25532-1	ind3	Indonesia	3	5.9	2	17.7
IRIS_313-10961	TARING PELUNDUK::IRGC 25821-2	ind3	Indonesia	2.6	9.3	3.6	24.2
IRIS_313-10962	TERUNG DAUN::IRGC 25823-2	ind3	Indonesia	2.4	8.8	3.7	21.1
IRIS_313-10963	KATAKCHIKON::IRGC 25880-1	aus	Bangladesh	2.7	8.5	3.1	23
IRIS_313-10964	SADUMONI::IRGC 25919-1	aus	Bangladesh	3	7.8	2.6	23.4
IRIS_313-10965	TILOKCHAN (SONABETHI)::IRGC 25927-1	aus	Bangladesh	2.6	8.7	3.3	22.6
IRIS_313-10970	NANG SAU DO::IRGC 26243-1	ind3	Viet Nam	2.7	7.6	2.8	20.5
IRIS_313-10976	LAKHSMI DIGHA::IRGC 26390-2	aus	Bangladesh	3.2	8.4	2.6	26.9
IRIS_313-10978	PANI TORONG::IRGC 26411-1	indx	Bangladesh	2.9	9.1	3.1	26.4
IRIS_313-10979	BORA DIGA::IRGC 26439-1	aus	Bangladesh	3.1	8.2	2.6	25.4
IRIS_313-10980	DUDHSAR::IRGC 26458-1	admix	Bangladesh	3	8.5	2.8	25.5
IRIS_313-10981	JHUL DIGA::IRGC 26478-1	aus	Bangladesh	3.2	7.7	2.4	24.6
IRIS_313-10982	LUDI GOCHYA::IRGC 26504-2	ind2	Bangladesh	3.5	7.8	2.2	27.3
IRIS_313-10983	BOROJYOT::IRGC 26578-2	indx	Bangladesh	2.9	8.5	2.9	24.7
IRIS_313-10984	DUDHSAR::IRGC 26609-2	ind2	Bangladesh	3.4	8.6	2.5	29.2
IRIS_313-10985	GOBOL SAIL (BALAM)::IRGC 26624-2	ind2	Bangladesh	2.4	8.6	3.6	20.6
IRIS_313-10986	HALDI JAON::IRGC 26638-2	ind2	Bangladesh	3.3	8.2	2.5	27.1
IRIS_313-10987	SUNGA WALA::IRGC 26802-2	aus	Bangladesh	3	8.3	2.8	24.9
IRIS_313-10990	BALIBUD::IRGC 26871-1	indx	Philippines	3.5	7.5	2.1	26.3
IRIS_313-10993	LANNAB::IRGC 26936-2	trop1	Philippines	4.1	9	2.2	36.9
IRIS_313-10994	PANGETAN::IRGC 26942-3	trop1	Philippines	3.3	8.9	2.7	29.4
IRIS_313-10996	BAKASI::IRGC 27074-1	indx	Indonesia	2.9	9.7	3.3	28.1
IRIS_313-10997	CEMPO MANGGAR::IRGC 27107-1	ind3	Indonesia	2.9	9	3.1	26.1
IRIS_313-10998	KETAN RASO::IRGC 27154-1	indx	Indonesia	2.7	8	3	21.6
IRIS_313-10999	LANDEO::IRGC 27164-1	trop1	Indonesia	3	9.5	3.2	28.5
IRIS_313-11000	MAIRUL::IRGC 27170-1	ind3	Indonesia	3.2	8	2.5	25.6
IRIS_313-11001	PAEDAI SOBUDI::IRGC 27222-1	trop1	Indonesia	3	9.9	3.3	29.7
IRIS_313-11003	PAE MEETO::IRGC 27254-1	trop1	Indonesia	3.1	9.2	3	28.5
IRIS_313-11004	PAE SANGGULA::IRGC 27297-1	trop1	Indonesia	3.4	9	2.6	30.6
IRIS_313-11006	PULU RENNI::IRGC 27386-1	ind3	Indonesia	3	8	2.7	24
IRIS_313-11007	PULUT BONGO::IRGC 27397-2	trop1	Indonesia	3.5	8.3	2.4	29.1
IRIS_313-11009	PULUT HALAPA::IRGC 27403-1	trop1	Indonesia	3.2	9.8	3.1	31.4
IRIS_313-11011	SUNAR::IRGC 27470-1	indx	Indonesia	3	8.6	2.9	25.8
IRIS_313-11012	TELURIKAN::IRGC 27478-1	admix	Indonesia	2.9	8.2	2.8	23.8
IRIS_313-11013	BOTESWAR 2::IRGC 27536-1	aus	Bangladesh	3.5	8.3	2.4	29.1
IRIS_313-11014	CHAKILA::IRGC 27540-1	aus	Bangladesh	3.1	8.3	2.7	25.7
IRIS_313-11015	HANPA::IRGC 27547-2	aus	Bangladesh	2.9	7.9	2.7	22.9
IRIS_313-11016	KACHILON::IRGC 27555-1	aus	Bangladesh	2.7	8.1	3	21.9
IRIS_313-11017	LOROI::IRGC 27567-1	aus	Bangladesh	3.4	8.6	2.5	29.2
IRIS_313-11018	MADISA::IRGC 27568-1	aus	Bangladesh	3.3	7.7	2.3	25.4
IRIS_313-11019	PORANG::IRGC 27577-1	aus	Bangladesh	3.1	8.2	2.6	25.4
IRIS_313-11020	BAMLA SUFFAID 320::IRGC 27776-1	aus	Pakistan	2.8	9.7	3.5	27.2
IRIS_313-11022	BASMATI SUFAID 100::IRGC 27791-3	aro	Pakistan	2.4	9.5	4	22.8
IRIS_313-11023	BASMATI SURKH 161::IRGC 27797-1	aro	Pakistan	2.5	9.6	3.8	24
IRIS_313-11024	BEGMI 135::IRGC 27845-1	aus	Pakistan	3	9.9	3.3	29.7
IRIS_313-11025	DHAN 263::IRGC 27926-2	aus	Pakistan	3.1	8.3	2.7	25.7
IRIS_313-11026	HANSRAJ::IRGC 27936-2	aro	Pakistan	2.4	10.2	4.3	24.5
IRIS_313-11027	JHONA 101::IRGC 27976-1	aus	Pakistan	2	7.3	3.7	14.6
IRIS_313-11029	MUSHKAN 340 A::IRGC 28073-1	aus	Pakistan	2.4	9.1	3.8	21.8
IRIS_313-11030	MUTANT 12-42::IRGC 28076-1	aro	Pakistan	2.1	8.6	4.1	18.1
IRIS_313-11031	NAWAN SATHRA BAGAR 344::IRGC 28079-1	aus	Pakistan	2.7	9.1	3.4	24.6
IRIS_313-11032	PALAM PURI BAS 137::IRGC 28084-1	aro	Pakistan	2.4	9.6	4	23
IRIS_313-11036	34::IRGC 28371-2	aus	Pakistan	2.9	9.4	3.2	27.3
IRIS_313-11037	421::IRGC 28458-1	aus	Pakistan	2.8	8	2.9	22.4
IRIS_313-11071	CHAO HAI::IRGC 29450-2	indx	Lao People's Democratic Republic	3.1	8.8	2.8	27.3
IRIS_313-11072	CHAO LEP NOK::IRGC 29451-2	ind3	Lao People's Democratic Republic	2.1	9	4.3	18.9
IRIS_313-11073	KHAO DAM::IRGC 29481-3	trop2	Lao People's Democratic Republic	3.4	9.5	2.8	32.3
IRIS_313-11074	KHAO MAK KHAM::IRGC 29533-1	ind3	Lao People's Democratic Republic	3.1	10.1	3.3	31.3
IRIS_313-11075	KHAO NAM YEN::IRGC 29546-2	japx	Lao People's Democratic Republic	3.8	8.8	2.3	33.4
IRIS_313-11077	LAI HANG HMA::IRGC 29608-2	trop2	Lao People's Democratic Republic	3.9	10.9	2.8	42.5
IRIS_313-11078	NON HAI::IRGC 29636-2	indx	Lao People's Democratic Republic	3.3	10.2	3.1	33.7
IRIS_313-11079	PHAN PHAE::IRGC 29652-2	ind3	Lao People's Democratic Republic	3.1	9.7	3.1	30.1
IRIS_313-11080	PHAE MEUN LAN::IRGC 29660-1	ind3	Lao People's Democratic Republic	3.4	9.2	2.7	31.3
IRIS_313-11081	THAO LOUANG::IRGC 29688-2	ind3	Lao People's Democratic Republic	3.7	10.4	2.8	38.5
IRIS_313-11083	EA TIA::IRGC 29713-2	ind3	Lao People's Democratic Republic	3.5	8.4	2.4	29.4
IRIS_313-11091	KHAO NON::IRGC 30051-1	indx	Lao People's Democratic Republic	3.3	10.3	3.1	34
IRIS_313-11092	KHAO PA SIEV::IRGC 30063-1	admix	Lao People's Democratic Republic	2.8	9.9	3.5	27.7
IRIS_313-11093	KHAO TAM::IRGC 30085-2	trop2	Lao People's Democratic Republic	4.2	9.5	2.3	39.9
IRIS_313-11094	MAK BOUAP::IRGC 30106-3	trop2	Lao People's Democratic Republic	4.1	11.1	2.7	45.5
IRIS_313-11110	SAYAM::IRGC 31538-2	ind2	Sri Lanka	3.2	8.9	2.8	28.5
IRIS_313-11111	SAITA::IRGC 31618-1	aus	Bangladesh	3.4	9.2	2.7	31.3
IRIS_313-11112	HIJOL DIGA::IRGC 31655-1	aus	Bangladesh	3.6	9	2.5	32.4
IRIS_313-11113	KAL SHULI::IRGC 31665-2	ind2	Bangladesh	3.4	9.3	2.7	31.6
IRIS_313-11114	BIRUI SAIL::IRGC 31745-2	ind2	Bangladesh	2.5	8.5	3.4	21.3
IRIS_313-11115	KALA MUNA::IRGC 31832-2	ind2	Bangladesh	3.6	8.2	2.3	29.5
IRIS_313-11116	KORTIK KAIKA::IRGC 31841-1	aus	Bangladesh	3.6	9.2	2.6	33.1
IRIS_313-11117	KAYELI KUNING::IRGC 31974-1	trop1	Indonesia	2.9	8.4	2.9	24.4
IRIS_313-11119	NEP BUNG::IRGC 32207-1	indx	Viet Nam	3.2	9.2	2.9	29.4
IRIS_313-11120	GURULEY::IRGC 32441-1	ind2	Bhutan	3.2	6.5	2	20.8
IRIS_313-11162	SABRAN::IRGC 34630-1	ind1B	Indonesia	2.9	10.6	3.7	30.7
IRIS_313-11163	NATEL BORO::IRGC 34749-1	aus	Bangladesh	2.9	8.1	2.8	23.5
IRIS_313-11177	DELI POCONG::IRGC 35265-1	indx	Indonesia	2.7	8.7	3.2	23.5
IRIS_313-11178	RUJAK DANAN::IRGC 35446-2	ind3	Indonesia	3	9.8	3.3	29.4
IRIS_313-11179	SI OMPAN LAMA::IRGC 35481-1	ind3	Indonesia	3.2	8.1	2.5	25.9
IRIS_313-11181	TAMBA PERAK::IRGC 35534-2	ind3	Indonesia	3	9.2	3.1	27.6
IRIS_313-11182	CEMPO CINA::IRGC 35581-2	ind3	Indonesia	2.9	8.4	2.9	24.4
IRIS_313-11183	KETAN LEMBAYUNGAN::IRGC 35745-2	trop1	Indonesia	3.4	9.6	2.8	32.6
IRIS_313-11191	RANRUWAN::IRGC 36360-1	aus	Sri Lanka	2.8	6.3	2.3	17.6
IRIS_313-11195	KHAW KAR 13::IRGC 36711-1	trop2	Myanmar	3.8	6.3	1.7	23.9
IRIS_313-11196	DICULA::IRGC 36729-2	ind3	Philippines	3.1	8.6	2.8	26.7
IRIS_313-11203	GOCHIAGARI::IRGC 37086-2	ind2	Bangladesh	2.8	7.8	2.8	21.8
IRIS_313-11204	KARTIKHAMA::IRGC 37149-2	indx	Bangladesh	2.8	7.7	2.8	21.6
IRIS_313-11205	KAZALSAIL::IRGC 37161-2	ind2	Bangladesh	3.2	8.9	2.8	28.5
IRIS_313-11207	PAIRJAT::IRGC 37252-2	ind2	Bangladesh	3.1	8.7	2.8	27
IRIS_313-11208	PARIJAT::IRGC 37272-2	indx	Bangladesh	2.6	10.2	3.9	26.5
IRIS_313-11209	VADAI::IRGC 37341-3	ind2	Bangladesh	3.6	8.1	2.3	29.2
IRIS_313-11210	ZARBASAIL::IRGC 37346-1	aus	Bangladesh	3.4	8.6	2.5	29.2
IRIS_313-11211	KADAMSAIL::IRGC 37468-2	ind2	Bangladesh	3.3	9.1	2.8	30
IRIS_313-11213	NARIKEL BADI::IRGC 37550-1	aus	Bangladesh	3.3	8.6	2.6	28.4
IRIS_313-11214	SHITTA AMAN::IRGC 37596-1	aus	Bangladesh	3.1	8.8	2.8	27.3
IRIS_313-11234	LIGUNGTUNG::IRGC 38786-1	indx	Philippines	2.9	10.4	3.6	30.2
IRIS_313-11311	CICIH KAPUK::IRGC 43377-3	trop1	Indonesia	3.4	8	2.4	27.2
IRIS_313-11312	PADI HITAM::IRGC 43496-3	ind3	Indonesia	3	7.7	2.6	23.1
IRIS_313-11313	PADI RENDAH::IRGC 43515-1	trop1	Indonesia	3.8	8.2	2.2	31.2
IRIS_313-11314	PELAU::IRGC 43538-2	trop1	Indonesia	3	9.6	3.2	28.8
IRIS_313-11315	PENDEK LAYUNG::IRGC 43542-2	ind3	Indonesia	2.8	9	3.2	25.2
IRIS_313-11316	RANTAT::IRGC 43563-3	ind3	Indonesia	2.9	6.7	2.3	19.4
IRIS_313-11317	SI RANTING::IRGC 43645-2	ind3	Indonesia	2.5	10.2	4.1	25.5
IRIS_313-11318	TUBU::IRGC 43677-2	ind3	Indonesia	3	10.4	3.5	31.2
IRIS_313-11319	KENCANA RANDAH::IRGC 43709-2	ind3	Indonesia	2.9	8.7	3	25.2
IRIS_313-11320	MAYAS PUTIH::IRGC 43727-2	ind3	Indonesia	2.6	9.2	3.5	23.9
IRIS_313-11321	GANDHISAIL::IRGC 43826-2	ind2	Bangladesh	2.6	7.8	3	20.3
IRIS_313-11322	JASURE AUS::IRGC 43860-1	aus	Bangladesh	3.3	7.9	2.4	26.1
IRIS_313-11323	JHORA::IRGC 43862-1	aus	Bangladesh	2.9	7.8	2.7	22.6
IRIS_313-11324	KALABOKRI::IRGC 43872-1	aus	Bangladesh	3.2	7.6	2.4	24.3
IRIS_313-11327	JAO' HAWN MAE JAN::IRGC 44022-2	ind3	Thailand	3.1	10.6	3.4	32.9
IRIS_313-11330	ALAMINOS::IRGC 44268-2	ind3	Philippines	3.1	10.3	3.3	31.9
IRIS_313-11331	AMPIPIT::IRGC 44272-2	ind3	Philippines	2.6	8.9	3.4	23.1
IRIS_313-11334	DINGRAS::IRGC 44402-1	ind3	Philippines	2.6	8.6	3.3	22.4
IRIS_313-11337	LAWA AN::IRGC 44544-2	trop1	Philippines	3.8	7.8	2.1	29.6
IRIS_313-11339	MILAGROSA::IRGC 44634-2	ind2	Philippines	3.5	7.6	2.2	26.6
IRIS_313-11340	MINANOK::IRGC 44637-2	trop1	Philippines	3.5	9.1	2.6	31.9
IRIS_313-11342	PODAO::IRGC 44701-1	indx	Philippines	3.7	9.2	2.5	34
IRIS_313-11343	PURTOK (MALAGKIT)::IRGC 44707-2	ind3	Philippines	3	10.4	3.5	31.2
IRIS_313-11344	SAMON::IRGC 44735-2	ind3	Philippines	2.7	9.2	3.4	24.8
IRIS_313-11345	WAGWAG::IRGC 44802-1	indx	Philippines	3	8.6	2.9	25.8
IRIS_313-11346	WAGWAG PUTI::IRGC 44804-2	ind1B	Philippines	2.7	8.7	3.2	23.5
IRIS_313-11347	WAGWAG RAOIS::IRGC 44805-1	indx	Philippines	3.9	9	2.3	35.1
IRIS_313-11377	AMARILLO::IRGC 47120-1	indx	Philippines	3.3	7	2.1	23.1
IRIS_313-11379	CADIDIT (GLUT)::IRGC 47161-1	trop1	Philippines	2.9	8.2	2.8	23.8
IRIS_313-11380	CA ONG (WHITE)::IRGC 47174-1	trop1	Philippines	3.1	6.9	2.2	21.4
IRIS_313-11381	LINANGAN::IRGC 47255-2	ind3	Philippines	3	8.4	2.8	25.2
IRIS_313-11382	HONDERAWALA::IRGC 47372-1	indx	Sri Lanka	2.7	6.7	2.5	18.1
IRIS_313-11383	CHIEM NGAN::IRGC 47488-1	indx	Viet Nam	2.8	9.1	3.3	25.5
IRIS_313-11384	CHIEM TONG NHAT 1::IRGC 47496-1	indx	Viet Nam	3	6.8	2.3	20.4
IRIS_313-11386	KHAO DAWK MALI TIA::IRGC 47773-2	ind3	Thailand	2.6	10.3	4	26.8
IRIS_313-11387	SAHM RUANG NAK::IRGC 47818-1	ind3	Thailand	3.1	9	2.9	27.9
IRIS_313-11389	LEUANG PRA TAHN::IRGC 48292-2	ind3	Thailand	2.9	10.2	3.5	29.6
IRIS_313-11390	NAH MOI::IRGC 48353-2	ind3	Thailand	3.7	10.4	2.8	38.5
IRIS_313-11392	SA MER::IRGC 48454-2	ind3	Thailand	2.8	9.7	3.5	27.2
IRIS_313-11393	SAWNG RUANG::IRGC 48458-2	ind3	Thailand	3	10.8	3.6	32.4
IRIS_313-11395	INDO NO 13075::IRGC 48665-3	ind3	Indonesia	2.4	8.2	3.4	19.7
IRIS_313-11397	TAMBU::IRGC 48932-1	trop1	Indonesia	3.5	8.6	2.5	30.1
IRIS_313-11398	TODULI::IRGC 48942-2	ind3	Indonesia	2.5	8.9	3.6	22.3
IRIS_313-11402	SUITE JORA::IRGC 49257-2	indx	Bangladesh	3	8.4	2.8	25.2
IRIS_313-11424	SINAPLED::IRGC 50402-1	trop1	Philippines	3.4	8.1	2.4	27.5
IRIS_313-11434	FORTUNA BLANCO (SAN MARCOS)::IRGC 50764-1	trop1	Colombia	3.4	9.8	2.9	33.3
IRIS_313-11435	MONMINEUPLEU::IRGC 50873-1	trop1	Cote d'Ivoire	3	9.5	3.2	28.5
IRIS_313-11436	SAKAZELE (538)::IRGC 50880-1	trop1	Cote d'Ivoire	3.2	9.4	2.9	30.1
IRIS_313-11441	NALA::IRGC 51247-1	trop1	Philippines	3.7	9.5	2.6	35.2
IRIS_313-11442	ARC 18502::IRGC 51749-2	indx	India	3.3	9.2	2.8	30.4
IRIS_313-11443	ARC 18533::IRGC 51756-1	indx	India	3.1	8.6	2.8	26.7
IRIS_313-11447	TUNAGANNAPNANG::IRGC 52046-1	indx	India	2.9	9.1	3.1	26.4
IRIS_313-11448	BARAMANJ::IRGC 52067-1	ind2	India	3.6	8.2	2.3	29.5
IRIS_313-11449	KODIA PHUL::IRGC 52168-1	indx	India	2.4	7.8	3.3	18.7
IRIS_313-11451	KALISAL::IRGC 52324-1	aro	India	2.5	8.3	3.3	20.8
IRIS_313-11452	LOCAL BHAT::IRGC 52343-1	aus	India	3.1	9.8	3.2	30.4
IRIS_313-11454	BARI SUTAR::IRGC 52410-1	aus	India	2.5	9.2	3.7	23
IRIS_313-11458	KARAHANI::IRGC 52664-1	aus	India	3.2	8.2	2.6	26.2
IRIS_313-11462	SALSI::IRGC 52833-1	aus	India	2	8.4	4.2	16.8
IRIS_313-11463	KATSIYAM TABAO::IRGC 52855-1	indx	Philippines	3.2	9	2.8	28.8
IRIS_313-11464	CARAWI::IRGC 52887-1	trop1	Philippines	3.1	9.6	3.1	29.8
IRIS_313-11465	DINORADO::IRGC 52893-1	trop1	Philippines	3.1	8.4	2.7	26
IRIS_313-11472	BANGBANG::IRGC 53131-1	ind3	Philippines	2.4	6.7	2.8	16.1
IRIS_313-11473	KINTOMAN (TOD DOY)::IRGC 53146-1	trop1	Philippines	4	8.1	2	32.4
IRIS_313-11481	BINNAFUL::IRGC 53479-1	aus	Bangladesh	2.8	9.5	3.4	26.6
IRIS_313-11482	BONGEZA::IRGC 53483-1	aus	Bangladesh	3.3	8.8	2.7	29
IRIS_313-11483	BOTESHSHORE::IRGC 53484-1	aus	Bangladesh	3.9	8	2.1	31.2
IRIS_313-11484	EJALI::IRGC 53500-1	aus	Bangladesh	2.8	8.6	3.1	24.1
IRIS_313-11485	RAMINAD (GERMAN)::IRGC 53058-1	ind3	Philippines	2.7	8.3	3.1	22.4
IRIS_313-11486	KHAGRAI DIGHA::IRGC 53529-3	admix	Bangladesh	3.4	7.9	2.3	26.9
IRIS_313-11487	LALDIGHA::IRGC 53541-1	ind2	Bangladesh	3.2	9.1	2.8	29.1
IRIS_313-11490	ARC 15480::IRGC 53799-1	indx	India	2.5	9	3.6	22.5
IRIS_313-11493	AR 133::IRGC 53942-1	indx	India	3.2	7.8	2.4	25
IRIS_313-11494	IC 25690::IRGC 53973-1	trop2	India	3.4	7.8	2.3	26.5
IRIS_313-11495	ANENOE::IRGC 54140-1	trop1	Indonesia	3.4	8.7	2.6	29.6
IRIS_313-11496	BALU PRIA::IRGC 54158-1	trop1	Indonesia	3.3	9.2	2.8	30.4
IRIS_313-11497	PADI ARA::IRGC 54252-2	ind2	Indonesia	3.6	9.3	2.6	33.5
IRIS_313-11498	PADI HEDENG (REKET HEDENG)::IRGC 54266-1	trop1	Indonesia	3.7	9.5	2.6	35.2
IRIS_313-11499	PADI UDANG::IRGC 54295-1	trop1	Indonesia	3.1	8.4	2.7	26
IRIS_313-11500	SKK::IRGC 54356-1	ind2	Indonesia	2.9	9.9	3.4	28.7
IRIS_313-11505	K 1074::IRGC 55017-1	ind2	India	3	8.6	2.9	25.8
IRIS_313-11506	K 15591-4::IRGC 55043-1	indx	India	3.3	7.6	2.3	25.1
IRIS_313-11508	PAWNG AEW 1::IRGC 55263-1	ind3	Thailand	2.9	9.4	3.2	27.3
IRIS_313-11509	PRADOO DAENG::IRGC 55265-1	ind3	Thailand	2.7	11	4.1	29.7
IRIS_313-11511	WAGASAN (RED)::IRGC 55404-1	trop1	Philippines	3.3	9.8	3	32.3
IRIS_313-11512	OYAK PAKANG::IRGC 55422-1	indx	Philippines	2.9	10.5	3.6	30.5
IRIS_313-11521	TAN NONG::IRGC 56126-1	indx	Viet Nam	3.8	8.4	2.2	31.9
IRIS_313-11523	ADIALLO::IRGC 56264-1	indx	Senegal	2.6	7.6	2.9	19.8
IRIS_313-11524	KOUINONEPOU::IRGC 56663-1	trop1	Cote d'Ivoire	3	8.9	3	26.7
IRIS_313-11525	DIAMBARANG::IRGC 56726-1	ind3	Guinea-Bissau	2.8	10.4	3.7	29.1
IRIS_313-11526	FOSSA (GBE)::IRGC 56767-1	trop1	Cote d'Ivoire	3.2	8.8	2.8	28.2
IRIS_313-11527	GOLO::IRGC 56856-1	trop1	Cote d'Ivoire	4	9.4	2.4	37.6
IRIS_313-11528	ZO::IRGC 56914-1	ind3	Cote d'Ivoire	3	9.6	3.2	28.8
IRIS_313-11530	JAO KHAO::IRGC 57046-1	ind3	Thailand	3.1	10.5	3.4	32.6
IRIS_313-11532	MARIA GAKIT::IRGC 57070-1	trop1	Philippines	3.7	8.9	2.4	32.9
IRIS_313-11534	NAHNG KHAO BOW::IRGC 57377-1	ind3	Thailand	3.1	8.3	2.7	25.7
IRIS_313-11540	PATIE ROUGE::IRGC 57686-1	trop1	Guinea	3.3	9.3	2.8	30.7
IRIS_313-11551	FELEGBASEH::IRGC 58443-1	ind3	Sierra Leone	2.6	8.2	3.2	21.3
IRIS_313-11554	PA RABICHINA::IRGC 58609-1	ind3	Sierra Leone	2.7	8.4	3.1	22.7
IRIS_313-11555	PA WOON::IRGC 58656-1	indx	Sierra Leone	3.1	8.1	2.6	25.1
IRIS_313-11556	TUBMAN::IRGC 58682-1	ind3	Sierra Leone	2.8	8.1	2.9	22.7
IRIS_313-11557	GORIA::IRGC 58736-1	aus	Bangladesh	3	8.6	2.9	25.8
IRIS_313-11558	NULI::IRGC 58824-1	ind2	Bangladesh	3	9.7	3.2	29.1
IRIS_313-11561	BANGLA::IRGC 58876-1	ind2	Nepal	2.3	9.5	4.1	21.9
IRIS_313-11564	HALIDA::IRGC 59005-1	aro	Nepal	3.4	7.4	2.2	25.2
IRIS_313-11567	RATO BASMATI::IRGC 59205-1	aro	Nepal	2.5	8.6	3.4	21.5
IRIS_313-11568	SATHIYA::IRGC 59225-1	ind1A	Nepal	3.1	8.4	2.7	26
IRIS_313-11594	CHAN THANH HOA::IRGC 60647-1	indx	Viet Nam	2.6	7.5	2.9	19.5
IRIS_313-11608	KHAO BAWNG::IRGC 61260-1	ind3	Thailand	2.8	8.3	3	23.2
IRIS_313-11609	MAE HAWM::IRGC 61283-1	ind3	Thailand	2.8	8.1	2.9	22.7
IRIS_313-11610	WUA PAN LAK::IRGC 61357-1	ind3	Thailand	2.6	9.7	3.7	25.2
IRIS_313-11615	MANARE (PHOM)::IRGC 61437-1	ind3	Guinea	2.9	7.2	2.5	20.9
IRIS_313-11616	UPRH 31::IRGC 61503-1	admix	India	3	7.7	2.6	23.1
IRIS_313-11617	UPRH 33::IRGC 61505-1	aus	India	3	7.9	2.6	23.7
IRIS_313-11618	UPRH 58::IRGC 61525-1	aus	India	2.3	9.2	4	21.2
IRIS_313-11619	UPRH 166::IRGC 61615-1	aus	India	2.4	7.9	3.3	19
IRIS_313-11620	UPRH 197::IRGC 61641-1	aus	India	2.7	8.8	3.3	23.8
IRIS_313-11621	UPRH 265::IRGC 61689-1	indx	India	2.5	8.1	3.2	20.3
IRIS_313-11624	ANADI WHITE::IRGC 61897-1	ind1A	Nepal	3	8.9	3	26.7
IRIS_313-11625	CHOBO::IRGC 61930-1	aro	Nepal	2.1	8.2	3.9	17.2
IRIS_313-11626	GUDURA::IRGC 61955-1	aro	Nepal	3.1	6.8	2.2	21.1
IRIS_313-11627	JADO::IRGC 61966-1	aro	Nepal	3.2	7.2	2.3	23
IRIS_313-11628	KARISHNABELI::IRGC 61979-1	admix	Nepal	3	7.2	2.4	21.6
IRIS_313-11629	LATIJHABAR::IRGC 61991-1	aus	Nepal	2.6	8.6	3.3	22.4
IRIS_313-11630	POHHERLIMASION::IRGC 62025-1	aro	Nepal	2.1	7.9	3.8	16.6
IRIS_313-11632	SETO JHINUWA::IRGC 62043-1	aro	Nepal	2.3	7.1	3.1	16.3
IRIS_313-11635	GAM PERNG::IRGC 62135-1	ind3	Thailand	3.4	9	2.6	30.6
IRIS_313-11658	MANYALOJOPOIHUN::IRGC 63350-1	trop1	Sierra Leone	3.4	8.9	2.6	30.3
IRIS_313-11659	TOBOHUN::IRGC 63433-1	trop1	Sierra Leone	2.9	8.2	2.8	23.8
IRIS_313-11660	WULE DASIMA::IRGC 63450-1	trop1	Liberia	3.3	9.5	2.9	31.4
IRIS_313-11661	91-382::IRGC 63464-1	temp	Bhutan	3.4	8.9	2.6	30.3
IRIS_313-11663	MARHARORA::IRGC 63511-1	admix	Zimbabwe	3.2	8.9	2.8	28.5
IRIS_313-11671	DERAWA::IRGC 64106-1	ind2	Nepal	2.9	9	3.1	26.1
IRIS_313-11672	RAI MANULA::IRGC 64138-1	temp	Nepal	3.1	6.7	2.2	20.8
IRIS_313-11674	BEUA KAE::IRGC 64221-1	ind3	Thailand	2.7	8.9	3.3	24
IRIS_313-11677	E NAWN KHAO::IRGC 64293-1	ind3	Thailand	2.8	9.3	3.3	26
IRIS_313-11679	GASET BOW::IRGC 64316-1	ind3	Thailand	2.7	10.2	3.8	27.5
IRIS_313-11680	KHAO BUN MI::IRGC 64366-2	ind3	Thailand	2.6	9.4	3.6	24.4
IRIS_313-11681	KHAO' PAWM::IRGC 64416-2	ind3	Thailand	3.2	9.1	2.8	29.1
IRIS_313-11682	MA EUE::IRGC 64502-1	ind3	Thailand	3.4	9.9	2.9	33.7
IRIS_313-11683	NIAW KHIAW NGOO::IRGC 64563-1	ind3	Thailand	2	8.8	4.4	17.6
IRIS_313-11684	OB CHUEY::IRGC 64568-1	ind3	Thailand	2.2	8.6	3.9	18.9
IRIS_313-11685	PLAWNG SAENG::IRGC 64595-1	ind3	Thailand	3	8.9	3	26.7
IRIS_313-11686	QUAHNG LUANG::IRGC 64609-2	ind3	Thailand	3.2	10.5	3.3	33.6
IRIS_313-11687	SA GAE::IRGC 64613-1	ind3	Thailand	2.6	9.5	3.7	24.7
IRIS_313-11688	SIA MOO::IRGC 64629-1	ind3	Thailand	2.7	7.6	2.8	20.5
IRIS_313-11690	KOCHUM::IRGC 64906-1	admix	Bhutan	2.6	7.7	3	20
IRIS_313-11691	SHANGYIPA::IRGC 64928-1	trop2	Bhutan	2.9	7.9	2.7	22.9
IRIS_313-11700	DAW NOK KAEN::IRGC 65548-1	ind3	Thailand	3.1	9.5	3.1	29.5
IRIS_313-11704	BAHN DAENG::IRGC 65771-1	ind3	Thailand	2.5	5.9	2.4	14.8
IRIS_313-11705	DAWK PUD KHAO::IRGC 65808-1	ind3	Thailand	2.9	9.2	3.2	26.7
IRIS_313-11706	KHAO' NOK 4::IRGC 65932-1	ind3	Thailand	2.8	6.1	2.2	17.1
IRIS_313-11707	KHAO SAHKORN::IRGC 65948-1	ind3	Thailand	2.7	9.3	3.4	25.1
IRIS_313-11708	KHAO YAI GUANG::IRGC 65972-1	ind3	Thailand	2.6	9.3	3.6	24.2
IRIS_313-11709	LEUANG KHAJAWN::IRGC 66014-1	ind3	Thailand	2.6	9.4	3.6	24.4
IRIS_313-11711	RAI MAHK MEUANG::IRGC 66154-1	ind3	Thailand	2.4	9.3	3.9	22.3
IRIS_313-11716	SOSSOKA::IRGC 66478-1	ind3	Guinea	2.7	9.5	3.5	25.7
IRIS_313-11717	JATI MANI::IRGC 66565-1	indx	Indonesia	3.2	8.8	2.8	28.2
IRIS_313-11722	KABERI::IRGC 66801-1	indx	Bangladesh	2.6	8.2	3.2	21.3
IRIS_313-11723	DISSIGBE::IRGC 66916-1	ind2	Guinea	2.6	10.8	4.2	28.1
IRIS_313-11724	KONYAN::IRGC 66931-1	ind3	Guinea	2.4	6.2	2.6	14.9
IRIS_313-11736	MALAGKIT (PINELIPE)::IRGC 67444-1	trop1	Philippines	3.3	7.7	2.3	25.4
IRIS_313-11737	CHUNDI::IRGC 67486-1	aus	India	3.2	6.7	2.1	21.4
IRIS_313-11738	PAUNDRI::IRGC 67527-1	ind2	India	3.2	8.4	2.6	26.9
IRIS_313-11739	NAKPUI::IRGC 67594-1	trop1	Ghana	3	9.2	3.1	27.6
IRIS_313-11741	HERATH BANDA::IRGC 67630-1	ind2	Sri Lanka	3.1	8.6	2.8	26.7
IRIS_313-11743	CHHOTI MASHINO::IRGC 67830-1	aro	Bhutan	3.1	9	2.9	27.9
IRIS_313-11779	KATUMANI::IRGC 69695-1	ind3	Tanzania	3	9.2	3.1	27.6
IRIS_313-11780	KILOMBERO::IRGC 69698-1	ind3	Tanzania	3.1	10.6	3.4	32.9
IRIS_313-11782	MALAGASY::IRGC 69717-1	ind2	Zambia	2.9	10.1	3.5	29.3
IRIS_313-11783	MAMA TABALI::IRGC 69720-1	indx	Gambia	2.9	9.2	3.2	26.7
IRIS_313-11784	MBEIMBEIHUN::IRGC 69730-1	ind1B	Sierra Leone	2.4	9.7	4	23.3
IRIS_313-11785	MOSHI::IRGC 69737-1	ind3	Tanzania	2.8	9.5	3.4	26.6
IRIS_313-11786	N'YA NOFF::IRGC 69749-1	ind3	Gambia	2.7	10.6	3.9	28.6
IRIS_313-11787	TANDAKAY FINGO::IRGC 69793-1	ind2	Gambia	3.7	8.9	2.4	32.9
IRIS_313-11791	VARY LAHY::IRGC 69908-1	ind2	Madagascar	3	9.6	3.2	28.8
IRIS_313-11792	VONBOANGY::IRGC 69947-1	trop1	Madagascar	4.1	8.7	2.1	35.7
IRIS_313-11793	KOMALIOKO::IRGC 69958-1	ind2	Madagascar	2.7	9.8	3.6	26.5
IRIS_313-11809	MHARAKA::IRGC 70612-1	aus	Kenya	2.5	10.5	4.2	26.3
IRIS_313-11810	PULURE::IRGC 70647-1	ind3	Kenya	2.9	9.9	3.4	28.7
IRIS_313-11811	MOSHI::IRGC 70648-1	ind2	Kenya	2.9	9.1	3.1	26.4
IRIS_313-11812	ASFALA::IRGC 70650-1	ind3	Kenya	2.8	10.2	3.6	28.6
IRIS_313-11813	ZERO::IRGC 70707-2	ind3	Kenya	2.7	9.8	3.6	26.5
IRIS_313-11814	KIKUBA::IRGC 70722-1	ind3	Kenya	2.8	11.2	4	31.4
IRIS_313-11815	MOSHI::IRGC 70730-1	ind3	Kenya	3	9.8	3.3	29.4
IRIS_313-11816	KARILETYONE::IRGC 70745-1	indx	Myanmar	3.1	7.8	2.5	24.2
IRIS_313-11817	KHAOSAING::IRGC 70746-2	indx	Myanmar	2.9	9.7	3.3	28.1
IRIS_313-11818	LETYONE::IRGC 70753-1	indx	Myanmar	3	8	2.7	24
IRIS_313-11819	PADINTHUMA::IRGC 70762-2	ind3	Myanmar	2.4	9.5	4	22.8
IRIS_313-11820	PAKISTANHMWE::IRGC 70763-1	ind3	Myanmar	2.7	10.1	3.7	27.3
IRIS_313-11823	BHU BHUSI::IRGC 70803-1	ind2	India	3	9.6	3.2	28.8
IRIS_313-11824	DHANIYA PHOOL::IRGC 70811-1	ind2	India	3.5	8.9	2.5	31.2
IRIS_313-11825	HANSRAJ::IRGC 70836-3	aro	India	2.7	9.5	3.5	25.7
IRIS_313-11826	HIRA NAKHI::IRGC 70840-1	aro	India	2.5	6.2	2.5	15.5
IRIS_313-11827	KARI GURMATIA::IRGC 70850-1	ind2	India	2.6	9.1	3.5	23.7
IRIS_313-11828	LALI GURMATIA::IRGC 70854-1	ind2	India	3.4	8.5	2.5	28.9
IRIS_313-11830	KANDEKE YAIGAITI::IRGC 70961-1	ind3	Gambia	2.6	7.7	3	20
IRIS_313-11835	E NOI NAH::IRGC 71138-1	indx	Thailand	3.2	9.9	3.1	31.7
IRIS_313-11836	KHAO KO RAOH::IRGC 71208-1	ind3	Thailand	2.8	9.1	3.3	25.5
IRIS_313-11837	KHAO NAHNG PRUNG::IRGC 71220-1	ind3	Thailand	3.1	11	3.5	34.1
IRIS_313-11838	LEUM DERN::IRGC 71288-1	ind3	Thailand	2.5	8.7	3.5	21.8
IRIS_313-11839	MUAY::IRGC 71318-1	ind3	Thailand	2.9	9.6	3.3	27.8
IRIS_313-11840	NIAW NAHK KRAD::IRGC 71352-1	ind3	Thailand	2.8	10.2	3.6	28.6
IRIS_313-11841	NIAW NARAI::IRGC 71353-1	ind3	Thailand	3.2	10.4	3.3	33.3
IRIS_313-11842	NIAW YUANG KHANUN::IRGC 71362-1	ind3	Thailand	2.9	8.9	3.1	25.8
IRIS_313-11843	PAN DAWK MAHK::IRGC 71380-1	ind3	Thailand	2.4	7.6	3.2	18.2
IRIS_313-11844	PUEY TAW::IRGC 71405-1	ind3	Thailand	3	8.7	2.9	26.1
IRIS_313-11888	KANGRI::IRGC 73104-1	aus	Pakistan	2.9	10.6	3.7	30.7
IRIS_313-11889	MURGI BRINJ::IRGC 73109-1	indx	Pakistan	3	9.8	3.3	29.4
IRIS_313-11893	KHAU DANH::IRGC 73201-1	indx	Viet Nam	3.2	8.7	2.7	27.8
IRIS_313-11894	LOC TRANG MUON::IRGC 73216-1	indx	Viet Nam	3.3	9	2.7	29.7
IRIS_313-11895	BA TUC RAN::IRGC 73239-1	ind3	Viet Nam	2.3	6.2	2.7	14.3
IRIS_313-11896	CA HIM::IRGC 73246-1	ind3	Viet Nam	2.6	7.6	2.9	19.8
IRIS_313-11914	IB 11::IRGC 74420-2	ind2	Burundi	2.6	10.7	4.1	27.8
IRIS_313-11916	MUDALIGA WEE::IRGC 74706-1	ind2	Sri Lanka	3.4	8.5	2.5	28.9
IRIS_313-11918	DILBAKSH::IRGC 74738-1	ind2	India	3.3	8.2	2.5	27.1
IRIS_313-11919	LAKHA KUAR::IRGC 74760-1	ind2	India	3	8.6	2.9	25.8
IRIS_313-11929	GILINGAN MARANGRAS::IRGC 75213-1	trop1	Philippines	2.5	9	3.6	22.5
IRIS_313-11932	SINDANO 3::IRGC 75279-1	ind2	Kenya	2.6	9.9	3.8	25.7
IRIS_313-11934	KANATO::IRGC 75306-2	indx	Philippines	3.3	9.6	2.9	31.7
IRIS_313-11935	KONG KHSACH BANG KATT::IRGC 75350-1	ind3	Cambodia	2	6.6	3.3	13.2
IRIS_313-11936	NEANG MINH TONN::IRGC 75366-2	ind3	Cambodia	2.4	8.8	3.7	21.1
IRIS_313-11938	GNASSOUMADOUGOU::IRGC 75595-1	indx	Burkina Faso	3	7.9	2.6	23.7
IRIS_313-11939	KAMPTI::IRGC 75626-1	ind3	Burkina Faso	2.6	9.8	3.8	25.5
IRIS_313-11940	MALOBA (DISSI ROUGE)::IRGC 75700-1	indx	Burkina Faso	2.8	8.5	3	23.8
IRIS_313-11941	MOUI SAMBA::IRGC 75751-1	ind1B	Burkina Faso	2.4	9.1	3.8	21.8
IRIS_313-11945	MALIKULI::IRGC 76237-1	ind2	Bangladesh	2.9	7.1	2.4	20.6
IRIS_313-11946	BWANGA MOUI::IRGC 76262-1	trop1	Burkina Faso	2.8	8.1	2.9	22.7
IRIS_313-11957	DAW LUEY 4-3::IRGC 76929-1	indx	Thailand	3.3	8.8	2.7	29
IRIS_313-11958	PUANG MAHLAI KHAO::IRGC 76959-1	ind3	Thailand	2.7	9.7	3.6	26.2
IRIS_313-11959	KAGIOS PUTI::IRGC 76965-3	ind3	Philippines	3.4	8.6	2.5	29.2
IRIS_313-11964	VUOTTA SAIL::IRGC 77306-1	ind2	Bangladesh	2.7	7.9	2.9	21.3
IRIS_313-11965	GUANG XUAN LIU HAO::IRGC 77341-1	ind1A	China	2.7	7.7	2.9	20.8
IRIS_313-11967	TANG DU GU::IRGC 77400-1	indx	China	2.4	7.8	3.3	18.7
IRIS_313-11970	BUNTU DOMBA 1::IRGC 77554-1	trop1	Indonesia	2.1	8.6	4.1	18.1
IRIS_313-11971	PARE LAMBAN BINGKA::IRGC 77601-1	trop1	Indonesia	3.1	10.9	3.5	33.8
IRIS_313-11973	NOINJO::IRGC 77669-1	temp	Korea, Republic of	3.1	6.8	2.2	21.1
IRIS_313-11977	MAMORIAKA::IRGC 77867-1	indx	Madagascar	2.7	7.6	2.8	20.5
IRIS_313-11982	PORASHI::IRGC 78397-1	aus	Bangladesh	3.4	7.7	2.3	26.2
IRIS_313-11983	KERIBAREFOR::IRGC 78454-1	ind2	Burkina Faso	2.8	9.3	3.3	26
IRIS_313-11988	POTOQOIN::IRGC 78677-1	indx	Sierra Leone	3.2	7.5	2.3	24
IRIS_313-11989	TAMBAS JANGKOK::IRGC 78724-1	ind3	Brunei Darussalam	2.8	7.4	2.6	20.7
IRIS_313-11991	CHON::IRGC 78776-1	ind3	Lao People's Democratic Republic	2.8	10.4	3.7	29.1
IRIS_313-11992	CHAO LAO SOUNG::IRGC 78799-1	ind3	Lao People's Democratic Republic	2.8	10.4	3.7	29.1
IRIS_313-11993	LIM MA NO MA KHIN NYUNT::IRGC 78917-1	indx	Myanmar	2.8	10.7	3.8	30
IRIS_313-11994	KALINDIG::IRGC 78968-1	trop1	Philippines	3.6	8.8	2.4	31.7
IRIS_313-11995	PINUTYUKAN::IRGC 78995-1	trop1	Philippines	3.6	9.2	2.6	33.1
IRIS_313-11997	BARUM::IRGC 79108-1	ind3	Cambodia	2.6	7.3	2.8	19
IRIS_313-11998	DAMNOEUB KAUN KHMOM::IRGC 79159-1	ind3	Cambodia	3	8	2.7	24
IRIS_313-11999	KAUN TREI::IRGC 79194-1	ind3	Cambodia	3	8.1	2.7	24.3
IRIS_313-12000	LAANG::IRGC 79258-1	ind3	Cambodia	2.7	7.8	2.9	21.1
IRIS_313-12002	LARA BORO::IRGC 79342-1	aus	Bangladesh	2.8	7.7	2.8	21.6
IRIS_313-12005	CHE MAH::IRGC 79480-1	ind3	Malaysia	3.1	8.5	2.7	26.4
IRIS_313-12006	PADI HANGIR::IRGC 79507-1	trop1	Malaysia	2.8	8.6	3.1	24.1
IRIS_313-12014	ADANKARU::IRGC 79842-1	ind2	Nigeria	2.7	10.3	3.8	27.8
IRIS_313-12015	DOGON IRI::IRGC 79882-1	ind2	Nigeria	2.7	9.3	3.4	25.1
IRIS_313-12016	EX AUBERGE::IRGC 79898-3	indx	Egypt	3	9	3	27
IRIS_313-12017	EX SANDEMA::IRGC 79964-1	indx	Ghana	3.3	7.9	2.4	26.1
IRIS_313-12018	FRENSI GBOI::IRGC 79983-1	trop1	Sierra Leone	3.5	9.2	2.6	32.2
IRIS_313-12027	ACEH (SELECTION)::IRGC 80233-1	ind3	Indonesia	3.1	9.1	2.9	28.2
IRIS_313-12028	CHAO BONG::IRGC 80266-2	indx	Lao People's Democratic Republic	3.2	10	3.1	32
IRIS_313-12029	CHAO MEO::IRGC 80273-1	trop2	Lao People's Democratic Republic	3.5	9.4	2.7	32.9
IRIS_313-12036	CHAN LEUY::IRGC 81223-1	ind3	Cambodia	2.7	8.4	3.1	22.7
IRIS_313-12037	KHMAO KDET::IRGC 81278-1	ind3	Cambodia	2.7	8.5	3.1	23
IRIS_313-12038	MUOY KUM::IRGC 81314-1	ind3	Cambodia	3.1	7.3	2.4	22.6
IRIS_313-12039	NEANG AN::IRGC 81315-1	ind3	Cambodia	2.5	10.2	4.1	25.5
IRIS_313-12040	NEANG LAU::IRGC 81328-1	ind3	Cambodia	2.7	7.6	2.8	20.5
IRIS_313-12041	NOU::IRGC 81352-1	ind3	Cambodia	2.6	7.7	3	20
IRIS_313-12042	PHCAR KABAS::IRGC 81357-1	ind3	Cambodia	2.9	7.9	2.7	22.9
IRIS_313-12043	SAMBOK ANGKRANG::IRGC 81375-1	ind3	Cambodia	2.6	8.2	3.2	21.3
IRIS_313-12044	SAR SIEM::IRGC 81386-2	ind3	Cambodia	2.6	8.2	3.2	21.3
IRIS_313-12045	BUYAN::IRGC 81440-1	trop1	Indonesia	2.6	8.8	3.4	22.9
IRIS_313-12046	KUJAM KURIT::IRGC 81477-1	ind3	Indonesia	2.4	7.8	3.3	18.7
IRIS_313-12047	LEMAK RUSA::IRGC 81486-1	ind3	Indonesia	2.7	7.1	2.6	19.2
IRIS_313-12048	LIMA::IRGC 81487-1	ind3	Indonesia	2.4	7.1	3	17
IRIS_313-12049	MAE HANG::IRGC 81615-2	ind3	Lao People's Democratic Republic	3.3	7.7	2.3	25.4
IRIS_313-12050	SHAN KAUK HNYIN::IRGC 81656-1	indx	Myanmar	3.2	9.4	2.9	30.1
IRIS_313-12052	ADUKKAN::IRGC 81783-1	indx	India	3.4	8.5	2.5	28.9
IRIS_313-12058	KUL REUSEI::IRGC 82308-1	ind3	Cambodia	2.7	6.8	2.5	18.4
IRIS_313-12067	531::IRGC 82643-1	indx	Philippines	2.3	8.3	3.6	19.1
IRIS_313-12068	PULUT KETAN::IRGC 82674-2	trop1	Indonesia	3.2	9.2	2.9	29.4
IRIS_313-12069	PULUT MAS::IRGC 82676-1	trop1	Indonesia	2.3	9	3.9	20.7
IRIS_313-12070	BABELIONG::IRGC 82688-1	trop1	Malaysia	2.3	9.2	4	21.2
IRIS_313-12074	KYAIN WAR ME DONE::IRGC 82819-1	aro	Myanmar	2.9	6.9	2.4	20
IRIS_313-12082	MAVOLATSIKA::IRGC 83137-1	ind2	Madagascar	2	9.7	4.9	19.4
IRIS_313-12083	SARIN TSIPALA::IRGC 83154-1	ind2	Madagascar	2.3	8.2	3.6	18.9
IRIS_313-12094	KASHA::IRGC 83865-1	aro	Bangladesh	2.1	4.7	2.2	9.9
IRIS_313-12096	NEANG CHEK::IRGC 83894-1	ind3	Cambodia	2.3	6.6	2.9	15.2
IRIS_313-12097	NEANG MINH::IRGC 83897-3	ind3	Cambodia	2.7	7	2.6	18.9
IRIS_313-12101	SAMRONG 2::IRGC 83951-1	ind3	Cambodia	2.1	6.2	3	13
IRIS_313-12102	SOK SOV::IRGC 83966-1	ind3	Cambodia	2.1	7.4	3.5	15.5
IRIS_313-12109	ARITH::IRGC 84347-2	ind3	Cambodia	2.1	6.4	3	13.4
IRIS_313-12121	CHA LIENG::IRGC 84920-1	ind3	Lao People's Democratic Republic	2.2	7.1	3.2	15.6
IRIS_313-12128	HMA GNENG::IRGC 85751-1	ind3	Lao People's Democratic Republic	2	7.6	3.8	15.2
IRIS_313-12129	MON LAI::IRGC 85857-1	trop2	Lao People's Democratic Republic	3.4	7	2.1	23.8
IRIS_313-12133	TAP KHOUAY::IRGC 86373-1	ind3	Lao People's Democratic Republic	2.5	7.5	3	18.8
IRIS_313-12134	THATENG::IRGC 86377-3	trop2	Lao People's Democratic Republic	3	7	2.3	21
IRIS_313-12142	ATT CHHMOUS::IRGC 87030-1	ind3	Cambodia	1.8	5.9	3.3	10.6
IRIS_313-12143	SRAU KHGNAERNG::IRGC 87073-1	ind3	Cambodia	2.3	6	2.6	13.8
IRIS_313-12146	AM BEUS::IRGC 87189-1	indx	Cambodia	2.8	8.2	2.9	23
IRIS_313-12147	ARNG'-KAR PHAR ONG::IRGC 87196-1	ind3	Cambodia	2.3	6.2	2.7	14.3
IRIS_313-12148	ARN'-SAR THNGORN'::IRGC 87205-1	ind3	Cambodia	1.8	5.8	3.2	10.4
IRIS_313-12151	DAMNOEUB KRACHAK SESS::IRGC 87380-1	ind3	Cambodia	1.6	6.6	4.1	10.6
IRIS_313-12152	DAMM NOEB THNGORN'::IRGC 87428-1	ind3	Cambodia	2	6.8	3.4	13.6
IRIS_313-12161	PA PHA EA::IRGC 87751-1	ind3	Cambodia	1.6	6.3	3.9	10.1
IRIS_313-12164	PA YANG NOEUGN::IRGC 87778-1	japx	Cambodia	2.2	6.2	2.8	13.6
IRIS_313-12180	JHINUWA DHAN::IRGC 88545-1	indx	Nepal	2.5	9.5	3.8	23.8
IRIS_313-12182	NYAULI::IRGC 88628-1	indx	Nepal	2.6	9	3.5	23.4
IRIS_313-12183	SETYA::IRGC 88654-1	aus	Nepal	3.6	7.4	2.1	26.6
IRIS_313-12190	CHAO KHAW NYAO::IRGC 89460-1	indx	Lao People's Democratic Republic	2.9	10.1	3.5	29.3
IRIS_313-12193	DO NOUAN::IRGC 89648-1	ind3	Lao People's Democratic Republic	3.6	9.9	2.8	35.6
IRIS_313-12194	EA POUAK::IRGC 89748-1	ind3	Lao People's Democratic Republic	3.3	9.5	2.9	31.4
IRIS_313-12207	SALA::IRGC 90457-1	indx	Lao People's Democratic Republic	3.2	8.4	2.6	26.9
IRIS_313-12210	CHAM TON::IRGC 90600-1	indx	Viet Nam	2.8	7	2.5	19.6
IRIS_313-12220	CHAO KHIE KHOUAY::IRGC 90968-1	indx	Lao People's Democratic Republic	2.7	7.8	2.9	21.1
IRIS_313-12222	LAM BOUN::IRGC 91525-1	ind3	Lao People's Democratic Republic	3	8.5	2.8	25.5
IRIS_313-12224	NOON SOUNG::IRGC 91956-1	ind3	Lao People's Democratic Republic	3.4	9.3	2.7	31.6
IRIS_313-12225	PA LAT NGAN::IRGC 91983-1	ind3	Lao People's Democratic Republic	3.3	8.5	2.6	28.1
IRIS_313-12226	PANG::IRGC 91987-1	trop2	Lao People's Democratic Republic	3.7	10.3	2.8	38.1
IRIS_313-12227	SET::IRGC 92200-1	trop2	Lao People's Democratic Republic	3.9	8.3	2.1	32.4
IRIS_313-12228	SOM::IRGC 92221-1	trop2	Lao People's Democratic Republic	3.3	9.3	2.8	30.7
IRIS_313-12229	TAM::IRGC 92253-1	ind3	Lao People's Democratic Republic	2.9	9.8	3.4	28.4
IRIS_313-12231	TOUN::IRGC 92291-2	ind3	Lao People's Democratic Republic	3.4	7.8	2.3	26.5
IRIS_313-12242	KHAO KHOT::IRGC 93892-1	trop2	Lao People's Democratic Republic	4	9.6	2.4	38.4
IRIS_313-12258	DON::IRGC 95117-1	trop2	Lao People's Democratic Republic	3.5	8.5	2.4	29.8
IRIS_313-12260	EA KHAW NGAN::IRGC 95176-2	ind3	Lao People's Democratic Republic	3.5	9.4	2.7	32.9
IRIS_313-12261	EA TOM::IRGC 95276-1	ind3	Lao People's Democratic Republic	2.8	9.6	3.4	26.9
IRIS_313-12263	KHIE TOM::IRGC 95601-1	ind3	Lao People's Democratic Republic	3.6	10.2	2.8	36.7
IRIS_313-12266	KAUK PAHLING::IRGC 95823-2	trop2	Myanmar	2.8	8.4	3	23.5
IRIS_313-12268	MAYATAUNG::IRGC 95957-1	indx	Myanmar	2.8	8.5	3	23.8
IRIS_313-12269	SHWEWARHNAN::IRGC 96053-1	indx	Myanmar	2.4	7.8	3.3	18.7
IRIS_313-12270	TOAM JUM::IRGC 96077-1	indx	Myanmar	3.2	8.2	2.6	26.2
IRIS_313-12286	EKAYIN SAW::IRGC 97468-2	ind3	Myanmar	2.5	9.3	3.7	23.3
IRIS_313-12287	KAUK HNYINGWA::IRGC 97487-1	ind3	Myanmar	2.7	9.7	3.6	26.2
IRIS_313-12288	NGWE TOE KYE::IRGC 97530-1	ind3	Myanmar	3.1	7.6	2.5	23.6
IRIS_313-12289	YARSABA::IRGC 97567-1	trop2	Myanmar	3.6	9.8	2.7	35.3
IRIS_313-12291	NGA CHEKH FAT::IRGC 97701-2	indx	Myanmar	2.9	8.7	3	25.2
IRIS_313-12292	EMAHTAKYAN::IRGC 97789-1	ind3	Myanmar	3.1	9	2.9	27.9
IRIS_313-12296	SABALINE::IRGC 98059-1	ind3	Myanmar	2.6	8.1	3.1	21.1
IRIS_313-12299	MUANG TAY::IRGC 98382-1	trop2	Lao People's Democratic Republic	4.1	10.9	2.7	44.7
IRIS_313-12300	NGAM KON DAM::IRGC 98486-1	indx	Lao People's Democratic Republic	3	8.6	2.9	25.8
IRIS_313-12301	LG 10178::IRGC 98526-1	indx	Lao People's Democratic Republic	3.6	8.7	2.4	31.3
IRIS_313-12303	LG 9274::IRGC 98715-1	indx	Lao People's Democratic Republic	3.4	9.4	2.8	32
IRIS_313-12305	PA KHENG KHAW::IRGC 98779-1	ind3	Lao People's Democratic Republic	3.5	8.1	2.3	28.4
IRIS_313-12308	SAM SI::IRGC 99020-1	ind3	Lao People's Democratic Republic	3.1	9.2	3	28.5
IRIS_313-12309	SANPATONG NYAY::IRGC 99050-1	ind3	Lao People's Democratic Republic	3.5	10.4	3	36.4
IRIS_313-12311	TAM::IRGC 99161-1	trop2	Lao People's Democratic Republic	2.7	10.2	3.8	27.5
IRIS_313-12321	LG 10344::IRGC 99789-1	trop2	Lao People's Democratic Republic	3.5	8.4	2.4	29.4
IRIS_313-12322	VOK::IRGC 99831-1	trop2	Lao People's Democratic Republic	3.6	9	2.5	32.4
IRIS_313-12323	BAN KEO::IRGC 99953-1	trop2	Lao People's Democratic Republic	3.7	10.9	2.9	40.3
IRIS_313-12330	CHAO PEE::IRGC 106767-1	trop2	Lao People's Democratic Republic	3	9.6	3.2	28.8
IRIS_313-12334	DO KHAW::IRGC 106977-1	ind3	Lao People's Democratic Republic	3.6	10.7	3	38.5
IRIS_313-12336	DO LEUANG::IRGC 106990-1	trop2	Lao People's Democratic Republic	4.3	9.7	2.3	41.7
IRIS_313-12337	DOK HIEN NOI::IRGC 107021-1	trop2	Lao People's Democratic Republic	3.9	11.7	3	45.6
IRIS_313-12340	NYAO::IRGC 107091-1	trop2	Lao People's Democratic Republic	3.7	10.5	2.8	38.9
IRIS_313-12342	HAI NA::IRGC 107117-1	trop2	Lao People's Democratic Republic	3.7	9.6	2.6	35.5
IRIS_313-12344	KHAO::IRGC 107359-1	trop2	Lao People's Democratic Republic	3.9	10.8	2.8	42.1
IRIS_313-12345	VIENG::IRGC 107375-2	trop2	Lao People's Democratic Republic	4	10.5	2.6	42
IRIS_313-12346	LAB::IRGC 107468-1	trop2	Lao People's Democratic Republic	3.8	10.7	2.8	40.7
IRIS_313-12347	LAI DAM::IRGC 107490-1	trop2	Lao People's Democratic Republic	4	8.4	2.1	33.6
IRIS_313-12348	LOUK NOK::IRGC 107599-1	trop2	Lao People's Democratic Republic	4.2	9.2	2.2	38.6
IRIS_313-12350	MAK KHEUA KANG::IRGC 107712-1	trop2	Lao People's Democratic Republic	3.8	9.1	2.4	34.6
IRIS_313-12351	KHAO LOUANG::IRGC 107770-3	trop2	Lao People's Democratic Republic	4.3	10.3	2.4	44.3
IRIS_313-12352	MEE::IRGC 107773-1	trop2	Lao People's Democratic Republic	3.7	8.9	2.4	32.9
IRIS_313-12353	MOK::IRGC 107804-1	trop2	Lao People's Democratic Republic	3.8	9	2.4	34.2
IRIS_313-12354	NASAENG::IRGC 107818-1	indx	Lao People's Democratic Republic	3.3	9.5	2.9	31.4
IRIS_313-12355	NASAENG::IRGC 107819-1	indx	Lao People's Democratic Republic	2.8	10.6	3.8	29.7
IRIS_313-7883	GANIGI::IRGC 48698-C1	trop1	Indonesia	3.6	8.5	2.4	30.6
IRIS_313-7933	KAKANI 2::IRGC 13373-C1	admix	Nepal	3.4	7.6	2.2	25.8
IRIS_313-8252	JAGLI BORO::IRGC 27516-2	aus	Bangladesh	2.8	7.9	2.8	22.1
IRIS_313-8253	KHAO DAWK MALI 105::IRGC 27748-2	ind3	Thailand	2.6	10.8	4.2	28.1
IRIS_313-8256	GERDEH::IRGC 32301-1	japx	Iran	3.3	9.2	2.8	30.4
IRIS_313-8268	CHHOTE DHAN::IRGC 58930-1	aro	Nepal	3.1	6.7	2.2	20.8
IRIS_313-8279	SAWAH::IRGC 71612-1	trop1	Malaysia	3.8	9.7	2.6	36.9
IRIS_313-8283	KOYRA::IRGC 77267-1	aus	Bangladesh	3.1	7.8	2.5	24.2
IRIS_313-8291	KEDOT::IRGC 66568-1	ind3	Indonesia	2.6	7.9	3	20.5
IRIS_313-8302	KAMJA::IRGC 62171-1	admix	Bhutan	3.3	8.3	2.5	27.4
IRIS_313-8303	SURMATIYA::IRGC 74779-1	ind2	India	2.9	8.6	3	24.9
IRIS_313-8305	URAIBOOL::IRGC 52785-1	ind2	India	3.2	9.6	3	30.7
IRIS_313-8306	PULUTHI KARAN (MIXED)::IRGC 77530-1	indx	India	3.2	8.2	2.6	26.2
IRIS_313-8312	BATU::IRGC 71508-1	ind3	Malaysia	3.3	8	2.4	26.4
IRIS_313-8314	BEUREUM MEULIT::IRGC 35563-1	trop1	Indonesia	3.2	9.1	2.8	29.1
IRIS_313-8342	KURULU WEE (WHITE)::IRGC 66518-1	aus	Sri Lanka	2.3	6.1	2.7	14
IRIS_313-8349	LATA MONA::IRGC 49333-1	ind2	Bangladesh	3.1	8.8	2.8	27.3
IRIS_313-8368	MENTIK TJERE BELUT::IRGC 18254-1	indx	Indonesia	2.7	9.1	3.4	24.6
IRIS_313-8381	PURAK SIRIBA::IRGC 71598-1	trop1	Malaysia	3.9	8.4	2.2	32.8
IRIS_313-8383	GENE::IRGC 67434-1	indx	Philippines	3.1	8.7	2.8	27
IRIS_313-8390	SUFAID 246::IRGC 28303-1	aus	Pakistan	2.2	10.9	5	24
IRIS_313-8398	KHARSU 80::IRGC 28016-1	aus	Pakistan	3.2	8.6	2.7	27.5
IRIS_313-8407	NACHIN ER 12::IRGC 14146-1	ind3	Malaysia	2.9	8.6	3	24.9
IRIS_313-8409	SOM NGHE AN::IRGC 60751-1	indx	Viet Nam	2.9	8.2	2.8	23.8
IRIS_313-8410	JABOR SAIL::IRGC 66831-1	aus	Bangladesh	3	7.8	2.6	23.4
IRIS_313-8431	BOCAO::IRGC 50384-1	trop1	Philippines	4.3	8.4	2	36.1
IRIS_313-8435	UPRH 233::IRGC 61667-1	ind1A	India	3.3	7.8	2.4	25.7
IRIS_313-8436	PIKTO MAMAS::IRGC 18487-1	trop1	Indonesia	3.2	8.7	2.7	27.8
IRIS_313-8437	IRRIBINI::IRGC 49094-1	indx	Bangladesh	3.3	7.9	2.4	26.1
IRIS_313-8457	SARA::IRGC 66631-1	ind3	Indonesia	2.9	6.5	2.2	18.9
IRIS_313-8466	CHAW GAM PRUED::IRGC 71103-1	ind3	Thailand	2.4	9.1	3.8	21.8
IRIS_313-8468	LEONG ORN 4135::IRGC 14087-1	ind3	Malaysia	2.3	7.9	3.4	18.2
IRIS_313-8474	PAH WEAN::IRGC 78276-1	ind3	Thailand	3.2	9.2	2.9	29.4
IRIS_313-8485	NAM SA GUI 19::IRGC 11462-1	ind3	Thailand	2.7	10.3	3.8	27.8
IRIS_313-8492	KUNENG::IRGC 71545-1	ind3	Malaysia	2.9	8.9	3.1	25.8
IRIS_313-8493	MELABOH::IRGC 66597-1	ind3	Indonesia	2.6	7.5	2.9	19.5
IRIS_313-8509	PUILLIPINA KATARI::IRGC 77293-1	ind2	Bangladesh	2.1	7.8	3.7	16.4
IRIS_313-8514	DAA MANSA::IRGC 67559-1	ind1B	Ghana	3	8.9	3	26.7
IRIS_313-8530	DHANE BURWA::IRGC 10105-1	ind2	India	3.4	8.1	2.4	27.5
IRIS_313-8536	NG KARAN DE::IRGC 43489-1	ind3	Indonesia	2.7	8.3	3.1	22.4
IRIS_313-8557	SERENDAH SUNGAI DUA 25::IRGC 13892-1	ind3	Malaysia	2.8	8.5	3	23.8
IRIS_313-8567	SINERBESA::IRGC 38711-1	ind3	Philippines	2.9	8.4	2.9	24.4
IRIS_313-8568	LARHA MUGAD::IRGC 52339-1	ind2	India	3	8.2	2.7	24.6
IRIS_313-8571	ES 21::IRGC 56171-1	ind3	Tanzania	3.2	10.8	3.4	34.6
IRIS_313-8586	PLI KHAO::IRGC 64596-1	ind3	Thailand	3.5	9.3	2.7	32.6
IRIS_313-8591	SIAM ER 32::IRGC 13917-1	ind3	Malaysia	2.6	9.4	3.6	24.4
IRIS_313-8608	SI HAO NDURIA::IRGC 66649-1	ind3	Indonesia	2.6	9.1	3.5	23.7
IRIS_313-8626	BANJANG::IRGC 44069-1	trop1	Malaysia	3.9	8.2	2.1	32
IRIS_313-8632	PATMADHAI 1::IRGC 77292-1	ind2	Bangladesh	2.6	8.1	3.1	21.1
IRIS_313-8637	BALINGMI::IRGC 62156-1	trop2	Bhutan	3	7.2	2.4	21.6
IRIS_313-8643	DAJA::IRGC 17440-1	ind3	Indonesia	2.8	7.6	2.7	21.3
IRIS_313-8655	TAK::IRGC 73124-1	aus	Pakistan	2.5	7.8	3.1	19.5
IRIS_313-8656	BASMATI 1::IRGC 27798-1	aro	Pakistan	2.4	9.7	4	23.3
IRIS_313-8660	KOTTEYARAN::IRGC 47383-1	ind2	Sri Lanka	3.1	7.4	2.4	22.9
IRIS_313-8664	SITORU::IRGC 66669-1	trop1	Indonesia	3.2	7.4	2.3	23.7
IRIS_313-8674	HAWM KRUA::IRGC 64333-1	ind3	Thailand	2.5	9.6	3.8	24
IRIS_313-8679	JAO LEUANG::IRGC 65866-1	ind3	Thailand	2.9	9.6	3.3	27.8
IRIS_313-8681	KOLITONDO::IRGC 66497-1	ind3	Guinea	2.6	7.7	3	20
IRIS_313-8683	JOTA BITCHI 1::IRGC 77253-1	ind2	Bangladesh	2.2	7.9	3.6	17.4
IRIS_313-8687	KEREN FENHO::IRGC 56735-1	trop1	Guinea-Bissau	3.6	8.1	2.3	29.2
IRIS_313-8699	BALASURIYA A::IRGC 66509-1	indx	Sri Lanka	3.4	8.2	2.4	27.9
IRIS_313-8702	KHAO PRAHJIN::IRGC 64420-1	ind3	Thailand	2.6	8.7	3.3	22.6
IRIS_313-8704	ROPA::IRGC 74774-1	ind2	India	2.9	10.4	3.6	30.2
IRIS_313-8713	NELI::IRGC 66603-1	ind3	Indonesia	2.4	7.6	3.2	18.2
IRIS_313-8717	BAZAIL::IRGC 27526-1	indx	Bangladesh	3.2	8	2.5	25.6
IRIS_313-8721	HOLOI BASH (SOLOI BASH)::IRGC 64778-1	aus	Bangladesh	2.8	8	2.9	22.4
IRIS_313-8722	HAWM TOONG::IRGC 48007-1	ind3	Thailand	3.2	10.5	3.3	33.6
IRIS_313-8723	KUTAI PAYA::IRGC 19528-1	ind3	Malaysia	2.7	10.1	3.7	27.3
IRIS_313-8725	PULUT BARAYA::IRGC 27393-1	ind3	Indonesia	2.5	7.8	3.1	19.5
IRIS_313-8727	T 315::IRGC 54792-1	ind2	India	3.3	8.8	2.7	29
IRIS_313-8731	NIBARI::IRGC 67742-1	ind2	India	3.1	8.1	2.6	25.1
IRIS_313-8732	WP 36::IRGC 55278-1	ind1B	Thailand	2.8	10.5	3.8	29.4
IRIS_313-8733	NOLOS::IRGC 77285-1	ind2	Bangladesh	3.1	7	2.3	21.7
IRIS_313-8735	NEP NGAU::IRGC 78369-1	japx	Viet Nam	3.3	8	2.4	26.4
IRIS_313-8744	REMOL::IRGC 18624-1	ind3	Indonesia	3	8.3	2.8	24.9
IRIS_313-8754	TYPE 50::IRGC 74782-1	ind2	India	3.4	8.5	2.5	28.9
IRIS_313-8765	TIMMURAY::IRGC 67857-1	aro	Bhutan	3	6.8	2.3	20.4
IRIS_313-8767	SIDIK::IRGC 66643-1	ind3	Indonesia	3.1	7.5	2.4	23.3
IRIS_313-8768	MOROFIN::IRGC 56698-1	trop1	Cote d'Ivoire	3.2	9.3	2.9	29.8
IRIS_313-8769	KOSAGI::IRGC 57692-1	trop1	Guinea	3.3	9.8	3	32.3
IRIS_313-8781	TAPANG::IRGC 13361-1	ind3	Malaysia	2.5	7.8	3.1	19.5
IRIS_313-8783	105::IRGC 40896-1	admix	Sri Lanka	3.1	8.7	2.8	27
IRIS_313-8785	LEUANG AWN::IRGC 48257-1	ind3	Thailand	2.8	10.4	3.7	29.1
IRIS_313-8789	LALSAITA::IRGC 43915-1	aus	Bangladesh	3	8.3	2.8	24.9
IRIS_313-8791	ARANG::IRGC 43322-1	ind3	Indonesia	2.7	8.6	3.2	23.2
IRIS_313-8796	DUDH KADAR::IRGC 67707-1	ind2	India	2.9	9	3.1	26.1
IRIS_313-8811	KATUNG::IRGC 71536-1	ind3	Malaysia	2.7	9.7	3.6	26.2
IRIS_313-8812	RELLY::IRGC 14623-1	ind3	Indonesia	3.1	7.9	2.5	24.5
IRIS_313-8814	SHANKA::IRGC 67848-1	aro	Bhutan	3	7.1	2.4	21.3
IRIS_313-8815	JANA (NAM)::IRGC 64897-1	trop2	Bhutan	2.9	7.7	2.7	22.3
IRIS_313-8831	KETAN KUNANG KUNENG::IRGC 48730-1	ind3	Indonesia	2.9	8	2.8	23.2
IRIS_313-8833	SIMET 2::IRGC 25734-1	ind3	Indonesia	3	8.2	2.7	24.6
IRIS_313-8850	ASHMBER::IRGC 27522-1	ind2	Bangladesh	3.2	8.2	2.6	26.2
IRIS_313-8854	CHAKOL::IRGC 77226-1	ind2	Bangladesh	3.1	7.8	2.5	24.2
IRIS_313-8857	KAMNAM::IRGC 64902-1	trop2	Bhutan	2.7	7.9	2.9	21.3
IRIS_313-8864	NOROI::IRGC 31611-1	aus	Bangladesh	3.7	8.3	2.2	30.7
IRIS_313-8865	PADI SEPAH::IRGC 48803-1	trop1	Indonesia	3.4	8	2.4	27.2
IRIS_313-8870	KHAO PLAH LAI NAK::IRGC 65941-1	ind3	Thailand	2.7	9.1	3.4	24.6
IRIS_313-8883	LOMPUG::IRGC 71559-1	japx	Malaysia	4.1	9.8	2.4	40.2
IRIS_313-8895	LEUANG DAM::IRGC 78267-1	ind3	Thailand	2.8	9.8	3.5	27.4
IRIS_313-8909	FAYA MOSHI::IRGC 69653-1	ind3	Tanzania	2.7	9.8	3.6	26.5
IRIS_313-8911	LEK::IRGC 40199-1	admix	Thailand	2.4	9.3	3.9	22.3
IRIS_313-8922	AGAI 1::IRGC 24532-1	ind2	Indonesia	2.9	8.7	3	25.2
IRIS_313-8924	KUTTA::IRGC 52184-1	ind2	India	3.1	8	2.6	24.8
IRIS_313-8925	KURULUTUDU::IRGC 36304-1	ind2	Sri Lanka	3.1	8.4	2.7	26
IRIS_313-8930	MUKKALA BAZAL::IRGC 77279-1	ind1B	Bangladesh	3	7.9	2.6	23.7
IRIS_313-8932	PATISAIL::IRGC 37562-1	ind3	Bangladesh	2.8	8	2.9	22.4
IRIS_313-8948	BUCAYAB::IRGC 44357-1	ind3	Philippines	2.9	8.7	3	25.2
IRIS_313-8956	RADEN KARAMUNTING::IRGC 20098-1	ind3	Indonesia	2.7	7.5	2.8	20.3
IRIS_313-8963	BATHURI::IRGC 25838-1	aus	Bangladesh	3.1	8	2.6	24.8
IRIS_313-8978	IE MATA CICEM::IRGC 66562-1	ind3	Indonesia	2.9	8.1	2.8	23.5
IRIS_313-8980	E DAW HAWM::IRGC 47938-1	ind3	Thailand	2.9	10.3	3.6	29.9
IRIS_313-8985	KHAO' HAWM::IRGC 78257-1	ind3	Thailand	2.9	8.2	2.8	23.8
IRIS_313-8987	SERIBU::IRGC 71615-1	indx	Malaysia	2.6	9.9	3.8	25.7
IRIS_313-8988	BANIKAT::IRGC 67720-1	ind2	India	3	8.7	2.9	26.1
IRIS_313-8996	SRAU SENG::IRGC 30290-1	ind3	Viet Nam	2.9	10.1	3.5	29.3
IRIS_313-8998	SIGAE::IRGC 66645-1	trop1	Indonesia	2.6	7.5	2.9	19.5
IRIS_313-9005	TJERE SUGI::IRGC 16650-1	ind3	Indonesia	2.8	10	3.6	28
IRIS_313-9006	LONG KHI KRAI::IRGC 64490-1	ind3	Thailand	3.5	10	2.9	35
IRIS_313-9019	KAM PAI::IRGC 78245-1	ind3	Thailand	3.1	9.7	3.1	30.1
IRIS_313-9020	LEUANG CHAIYAPHUM::IRGC 78266-1	ind3	Thailand	2.6	9.4	3.6	24.4
IRIS_313-9048	TSCHINANANGKA::IRGC 64935-1	trop2	Bhutan	2.9	7	2.4	20.3
IRIS_313-9050	ANGKARONG::IRGC 71493-1	trop1	Malaysia	3.6	8	2.2	28.8
IRIS_313-9054	BIDAPIK::IRGC 43354-1	ind3	Indonesia	2.8	7.2	2.6	20.2
IRIS_313-9067	BHOJON KOLPO::IRGC 31727-1	ind2	Bangladesh	3.3	9.9	3	32.7
IRIS_313-9072	MUTA GANJE::IRGC 26744-1	ind2	Bangladesh	2.8	8.2	2.9	23
IRIS_313-9081	TAKAO MOCHI::IRGC 2564-1	temp	Japan	3.3	7.2	2.2	23.8
IRIS_313-9091	SINNA SITHIRA KALI::IRGC 51064-1	indx	Sri Lanka	3.1	8	2.6	24.8
IRIS_313-9097	CANTIK PAUN::IRGC 66538-1	ind3	Indonesia	2.8	8	2.9	22.4
IRIS_313-9098	SI MERIA::IRGC 66659-1	ind3	Indonesia	2.9	6.9	2.4	20
IRIS_313-9101	DARAWAL::IRGC 71514-1	admix	Malaysia	3.3	9.9	3	32.7
IRIS_313-9108	RAYADA::IRGC 27594-1	indx	Bangladesh	3.1	8.1	2.6	25.1
IRIS_313-9117	BAJAR KUNING PAHIT::IRGC 17186-1	ind3	Indonesia	2.7	8.3	3.1	22.4
IRIS_313-9121	KHAO LEUANG RAI::IRGC 48168-1	ind2	Thailand	3.1	10	3.2	31
IRIS_313-9123	LEUANG GLIANG::IRGC 71271-1	trop2	Thailand	3	8.5	2.8	25.5
IRIS_313-9129	LAYANDABU::IRGC 25214-1	trop1	Indonesia	3	9.1	3	27.3
IRIS_313-9139	GOJOL GORIA::IRGC 26629-1	ind2	Bangladesh	2.5	8.1	3.2	20.3
IRIS_313-9174	KUSHIARA::IRGC 34709-1	ind2	Bangladesh	3.4	8.2	2.4	27.9
IRIS_313-9188	TUMBA::IRGC 66681-1	ind3	Indonesia	2.7	7.6	2.8	20.5
IRIS_313-9208	KACIK TARAM::IRGC 35310-1	ind3	Indonesia	3.1	8.7	2.8	27
IRIS_313-9209	LEUANG LAI MAE PRAJAN::IRGC 71279-1	ind3	Thailand	2.5	8.5	3.4	21.3
IRIS_313-9210	KUATEK::IRGC 14285-1	ind3	Malaysia	2.8	6.8	2.4	19
IRIS_313-9218	KALO CHAKOL::IRGC 77258-1	ind2	Bangladesh	3	7.9	2.6	23.7
IRIS_313-9239	RIMBUN::IRGC 43741-1	trop1	Indonesia	3.3	10.1	3.1	33.3
IRIS_313-9242	SUKARADJA::IRGC 18936-1	admix	Indonesia	3.5	8.7	2.5	30.5
IRIS_313-9251	JANDA LAOR::IRGC 48552-1	ind3	Indonesia	3	6.8	2.3	20.4
IRIS_313-9256	GALWAKA HANDERAN::IRGC 31381-1	indx	Sri Lanka	3.7	9.3	2.5	34.4
IRIS_313-9258	MAKRO::IRGC 74763-1	ind2	India	3.2	8.4	2.6	26.9
IRIS_313-9262	JHODI BIRUN::IRGC 31812-1	ind2	Bangladesh	2.9	8.9	3.1	25.8
IRIS_313-9271	PURA BINNI::IRGC 26772-1	ind2	Bangladesh	2.8	8.2	2.9	23
IRIS_313-9281	KHAO KAI::IRGC 78251-1	ind3	Thailand	3	9.4	3.1	28.2
IRIS_313-9283	TAK SUFAID::IRGC 73127-1	aus	Pakistan	3.1	8.2	2.6	25.4
IRIS_313-9288	TONG MAH::IRGC 65577-1	ind3	Thailand	2.9	10.1	3.5	29.3
IRIS_313-9301	KETAN DONGGO::IRGC 54201-1	trop1	Indonesia	3.1	9.7	3.1	30.1
IRIS_313-9310	PUTEH KACA::IRGC 66614-1	ind3	Indonesia	3	7.2	2.4	21.6
IRIS_313-9313	ARC 10799::IRGC 12631-1	indx	India	3.1	8.3	2.7	25.7
IRIS_313-9314	KAAKARAN::IRGC 27138-1	indx	Indonesia	2.8	10.3	3.7	28.8
IRIS_313-9317	VEN THAP::IRGC 56138-1	indx	Viet Nam	3.1	7.8	2.5	24.2
IRIS_313-9325	SADA RUPA::IRGC 77299-1	ind1B	Bangladesh	2.7	9.1	3.4	24.6
IRIS_313-9329	KERITING TINGGI::IRGC 19972-1	ind3	Indonesia	2.7	8.6	3.2	23.2
IRIS_313-9342	LUA CHAN HUONG::IRGC 16800-1	ind3	Viet Nam	2.6	9.2	3.5	23.9
IRIS_313-9368	CHANDARHAT::IRGC 25845-1	aus	Bangladesh	3.2	8.3	2.6	26.6
IRIS_313-9375	PULUTAN::IRGC 71596-1	trop1	Malaysia	3.2	10.3	3.2	33
IRIS_313-9379	HWANGJO::IRGC 55547-1	temp	Korea, Republic of	3.4	6.7	2	22.8
IRIS_313-9384	BARIK KUDI::IRGC 52807-1	ind2	India	2.1	8	3.8	16.8
IRIS_313-9389	KINANDANG BUSIKSIK::IRGC 74607-1	trop1	Philippines	3.5	7.9	2.3	27.7
IRIS_313-9402	PA FADAYA::IRGC 58524-1	indx	Sierra Leone	3	8.9	3	26.7
IRIS_313-9403	BADUIE::IRGC 53715-1	ind2	India	2.6	8.6	3.3	22.4
IRIS_313-9404	YANGKUM (RED)::IRGC 32406-1	admix	Bhutan	3.5	8.4	2.4	29.4
IRIS_313-9405	INGSA BELANAK::IRGC 43402-1	trop1	Indonesia	3.5	8.5	2.4	29.8
IRIS_313-9406	LEUANG SAWED::IRGC 78268-1	ind3	Thailand	2.5	9.3	3.7	23.3
IRIS_313-9409	GUMPANGAR::IRGC 71524-1	ind3	Malaysia	2.7	9.6	3.6	25.9
IRIS_313-9415	PAHK NOK GAEW::IRGC 64572-1	ind3	Thailand	2.6	8	3.1	20.8
IRIS_313-9422	CHUNGUR BALI::IRGC 25855-1	aus	Bangladesh	2.7	7.2	2.7	19.4
IRIS_313-9423	AGUYOD::IRGC 67423-1	trop1	Philippines	3.6	7.5	2.1	27
IRIS_313-9445	KOIYA DIGHA::IRGC 63517-1	admix	Bangladesh	3.3	7.8	2.4	25.7
IRIS_313-9449	JAMBALI::IRGC 73101-1	aus	Pakistan	2.8	8.9	3.2	24.9
IRIS_313-9451	PAMAH S 18::IRGC 61322-1	indx	Thailand	2.9	9.8	3.4	28.4
IRIS_313-9469	TSAO SHENG LI 1::IRGC 1309-1	ind1A	China	3.4	8.6	2.5	29.2
IRIS_313-9470	SAHULO FACHE SOYO::IRGC 66630-1	trop1	Indonesia	2.9	7.9	2.7	22.9
IRIS_313-9503	BINUHANGIN::IRGC 67429-1	indx	Philippines	2.8	8.7	3.1	24.4
IRIS_313-9506	TIMA::IRGC 67856-1	admix	Bhutan	3.2	7.4	2.3	23.7
IRIS_313-9529	DAGPA BARA::IRGC 64887-1	trop2	Bhutan	3.1	8	2.6	24.8
IRIS_313-9547	LABRA::IRGC 74757-1	ind2	India	3	8.9	3	26.7
IRIS_313-9557	MULLIKURUVA::IRGC 77529-1	ind2	India	2.9	5.9	2	17.1
IRIS_313-9558	LIMBAYAN::IRGC 71556-1	trop1	Malaysia	3.5	9.7	2.8	34
IRIS_313-9572	ASU::IRGC 62154-1	indx	Bhutan	2.6	8.5	3.3	22.1
IRIS_313-9574	B 78-S81::IRGC 58415-1	indx	Brunei Darussalam	2.6	9.1	3.5	23.7
IRIS_313-9575	MAE YEU::IRGC 64509-1	ind3	Thailand	2.9	11.3	3.9	32.8
IRIS_313-9582	SADOK::IRGC 13334-1	ind3	Malaysia	2.7	9.5	3.5	25.7
IRIS_313-9590	KETAN SERANG::IRGC 14615-1	ind3	Indonesia	2.8	8.4	3	23.5
IRIS_313-9594	ASHI BINNI::IRGC 77216-1	indx	Bangladesh	3	7.5	2.5	22.5
IRIS_313-9600	E LONG MAH::IRGC 47946-1	indx	Thailand	3	10	3.3	30
IRIS_313-9601	CHAWAL::IRGC 73090-1	aro	Pakistan	2.4	10.1	4.2	24.2
IRIS_313-9605	NCS 194::IRGC 51932-1	ind1A	India	3	7.9	2.6	23.7
IRIS_313-9610	DANGAR::IRGC 76296-1	aus	India	2.6	9.1	3.5	23.7
IRIS_313-9611	WANGA BARUGULU::IRGC 52261-1	ind2	India	2.6	8.5	3.3	22.1
IRIS_313-9617	HOLDI GIRA::IRGC 31801-1	ind2	Bangladesh	3.3	8.3	2.5	27.4
IRIS_313-9626	KALIA::IRGC 34699-1	aus	Bangladesh	3.1	8.9	2.9	27.6
IRIS_313-9637	BONG BOI::IRGC 32094-1	ind3	Viet Nam	3	8	2.7	24
IRIS_313-9661	LENJA MURALI::IRGC 66815-1	aus	Bangladesh	3.1	7.9	2.5	24.5
IRIS_313-9669	KAMPAI PEUN MEUANG::IRGC 78248-1	ind3	Thailand	3.3	9	2.7	29.7
IRIS_313-9687	PA KABAKIE::IRGC 58541-1	indx	Sierra Leone	3.2	8	2.5	25.6
IRIS_313-9691	SIFARASI::IRGC 66644-1	trop1	Indonesia	2.6	9.7	3.7	25.2
IRIS_313-9694	UNGGUL::IRGC 71644-1	ind3	Malaysia	2.8	7.7	2.8	21.6
IRIS_313-9695	SOLAY GHAT::IRGC 73121-1	aus	Pakistan	3.3	8.5	2.6	28.1
IRIS_313-9696	NAZIRA SAIL::IRGC 77284-1	indx	Bangladesh	2.5	7.1	2.8	17.8
IRIS_313-9697	BOW SU SO::IRGC 78237-1	ind3	Thailand	2.6	8.2	3.2	21.3
IRIS_313-9698	JO SANG DAE YA::IRGC 90852-1	temp	Democratic People's Republic of Korea	3.1	6.4	2.1	19.8
IRIS_313-9699	SERAUP 27::IRGC 1-1	ind3	Malaysia	3.4	8.5	2.5	28.9
IRIS_313-9740	ROJOFOTSY::IRGC 69402-1	ind2	Madagascar	2.9	8.9	3.1	25.8
IRIS_313-9742	LOHAMBITRO::IRGC 69857-1	trop1	Madagascar	3.2	10.7	3.3	34.2
IRIS_313-9745	VARY MALADY::IRGC 69911-1	trop1	Madagascar	3.3	10.1	3.1	33.3
IRIS_313-9774	EGYPTIAN::IRGC 3217-1	japx	Turkey	3.5	7.5	2.1	26.3
IRIS_313-9783	BERENJ 1277 S::IRGC 3461-1	admix	Afghanistan	2.6	9.1	3.5	23.7
IRIS_313-9809	NALUMOOLAI KARUPAN::IRGC 8993-1	ind3	Sri Lanka	3.6	8.6	2.4	31
IRIS_313-9831	PODIWEE::IRGC 11938-1	indx	Sri Lanka	3.6	9.1	2.5	32.8
IRIS_313-9832	RANGOON SAMBA::IRGC 11940-1	ind2	Sri Lanka	3.2	6.3	2	20.2
IRIS_313-9851	GOGOWIERIE::IRGC 14791-1	trop1	Surinam	3.3	7.7	2.3	25.4
IRIS_313-9861	KURKARUPPAN::IRGC 15449-1	aus	Sri Lanka	3.3	8.9	2.7	29.4
IRIS_313-9862	MODDAI KARUPPAN::IRGC 15465-1	ind2	Sri Lanka	3.5	9.3	2.7	32.6
IRIS_313-9867	SIGARDIS::IRGC 15555-1	ind1B	Sri Lanka	2.9	9.1	3.1	26.4
IRIS_313-9886	HUK ZO::IRGC 19760-1	temp	Korea, Republic of	3.4	6.9	2	23.5
IRIS_313-9887	JEUK DO::IRGC 19775-1	temp	Korea, Republic of	3.3	7.1	2.2	23.4
IRIS_313-9890	WA BANG::IRGC 19880-1	temp	Korea, Republic of	3.4	7.3	2.1	24.8
IRIS_313-9891	YONG AN HUK::IRGC 19891-1	temp	Korea, Republic of	3.3	7.3	2.2	24.1
IRIS_313-9917	CHANDINA::IRGC 36420-1	ind1B	Sri Lanka	2.8	7.8	2.8	21.8
IRIS_313-9926	TOURBE::IRGC 47066-1	indx	Chad	3	10.6	3.5	31.8
IRIS_313-9929	GOBYERNO::IRGC 47216-1	trop1	Philippines	3.2	8.3	2.6	26.6
IRIS_313-9968	KULA KARUPPAN::IRGC 55328-1	indx	Sri Lanka	3.4	8	2.4	27.2
IRIS_313-9969	PUTTU NELLU::IRGC 55346-1	indx	Sri Lanka	3.1	8.7	2.8	27
IRIS_313-9970	RACE PERUMAL::IRGC 55347-1	ind2	Sri Lanka	3.1	7.5	2.4	23.3
IRIS_313-9974	HEUKSANJO::IRGC 55536-1	temp	Korea, Republic of	3.5	7.2	2.1	25.2
IRIS_313-9976	SSANGDUJO::IRGC 55632-1	ind1A	Korea, Republic of	3.4	7.9	2.3	26.9
IRIS_313-9986	SOM DIGUIME::IRGC 56751-1	indx	Guinea-Bissau	3.2	8	2.5	25.6
IRIS_313-9989	MELEKE::IRGC 56823-1	ind3	Cote d'Ivoire	3.1	9.3	3	28.8
LR003	Pai-Mi-Fen	TW_Ind	Taiwan	3.1	7.7	2.5	24.3
LR004	Yuan-Li(0002166)	TW_Ind	Taiwan	3.1	8.1	2.6	24.8
LR006	Ko-Tzu	TW_Ind	Taiwan	2.8	7.3	2.6	20.6
LR011	I-KUNG-PAO	TW_Ind	Taiwan	3.2	7	2.2	22.3
LR014	fluffy	TW_Ind	Taiwan	3	7	2.3	21.1
LR015	Tien-Lai	TW_Ind	Taiwan	2.9	7.8	2.7	22.9
LR016	Pai-Chan	TW_Ind	Taiwan	3.1	7.1	2.3	21.7
LR018	Chu-Tzu(0002672)	TW_Ind	Taiwan	3.1	7.7	2.5	23.8
LR019	Early Frost 1	TW_Ind	Taiwan	3	7.3	2.4	21.8
LR101	Pai-Ko-Tsao-Tzu	TW_Ind	Taiwan	3.2	7	2.2	22.3
LR105	Feng Tsai Chut	TW_Ind	Taiwan	2.4	6.2	2.5	15.1
LR106	OLoanChu	TW_Ind	Taiwan	3.5	7.4	2.1	25.8
LR107	Chu-His-Chu-1(Tek Si Chut)	TW_Ind	Taiwan	2.6	7.8	3.1	19.8
LR111	Fu-Tou-O-Luan-Chu	TW_Ind	Taiwan	3.3	7.6	2.3	25.4
LR117	CHIAYI WU-K'O::IRGC 64974-1	ind1A	Taiwan	3.2	7.2	2.3	23
LR117	CHIAYI-WU-KO	TW_Ind	Taiwan	3.3	7.6	2.3	25
LR118	CHING CH'UNG::IRGC 65002-1	indx	Taiwan	2.7	6.9	2.6	18.6
LR118	CHING-CHUNG	TW_Ind	Taiwan	2.7	7.2	2.7	19.2
LR119	CHING LIU::IRGC 65018-1	indx	Taiwan	2.7	7.1	2.6	19.2
LR119	CHING-LIU	TW_Ind	Taiwan	3.1	7.8	2.5	24.2
LR120	HSIN-T'AO YUAN CHING YU::IRGC 65074-1	ind1A	Taiwan	3	8.3	2.8	24.9
LR120	HSIN-TAO-YUAN-CHING-YU	TW_Ind	Taiwan	3	8.5	2.8	25.4
LR122	HSINCHU AI CHIO CHIENG	TW_Ind	Taiwan	3.5	7.4	2.1	26.1
LR124	NIAO YAO	TW_Ind	Taiwan	2.9	7.8	2.7	22.6
LR128	Hei Mi Chan	TW_Ind	Taiwan	2.8	6.8	2.4	19.4
LR164	PAI-JIH-TUNG-CHAN	TW_Ind	Taiwan	3.2	8.8	2.8	27.8
LR165	LING-HO	TW_Ind	Taiwan	3.1	8.1	2.6	25.4
LR167	Pai-K'o-P'u-Chan	TW_Ind	Taiwan	3.1	7.4	2.4	22.8
LR168	TiChuehHuaLou	TW_Ind	Taiwan	3.2	7.8	2.4	25.1
LR169	TiChuehLiuChou	TW_Ind	Taiwan	3.2	7.3	2.3	23
LR170	TiChuehKoTzu	TW_Ind	Taiwan	2.7	7.7	2.8	20.9
LR171	DGWG	TW_Ind	Taiwan	2.9	7.9	2.7	22.8
LR172	TiChuehWuKo	TW_Ind	Taiwan	3.2	7.7	2.4	24.7
LR173	TiChuehMinTang	TW_Ind	Taiwan	2.9	7.9	2.7	22.7
LR174	Hua-Lou	TW_Ind	Taiwan	2.9	7.7	2.7	22
LR175	Ching-kuo-chan	TW_Ind	Taiwan	2.7	7.6	2.9	20.2
LR177	Liu-to-tzu	TW_Ind	Taiwan	3.3	6.7	2	21.8
LR178	Wu-Chan	TW_Ind	Taiwan	2.9	7.1	2.5	20.3
LR180	WuKo	TW_Ind	Taiwan	3.5	7.5	2.1	26.2
LR182	Min-Tang	TW_Ind	Taiwan	2.8	7.9	2.8	22.3
LR184	HeiChan	TW_Ind	Taiwan	2.8	8	2.8	22.3
LR185	Hsin-Chu-Liu-Chan	TW_Ind	Taiwan	2.9	8.4	2.9	24
LR186	Aitsaichung	TW_Ind	Taiwan	2.9	8.3	2.9	23.9
LR187	AiChuehChingYu	TW_Ind	Taiwan	2.9	8.1	2.8	23.8
LR188	kao-chueh-ko-tsu	TW_Ind	Taiwan	2.7	7.6	2.8	20.8
LR189	LUNG-YA-CHAN	TW_Ind	Taiwan	2.3	9.6	4.2	21.8
LR190	Han-Yeh-Ko-Tzu	TW_Ind	Taiwan	2.9	6.8	2.3	19.7
LR191	Han-Tai-Chu	TW_Ind	Taiwan	3	7.3	2.4	21.8
LR192	Ching-Yu-Chu	TW_Ind	Taiwan	2.7	7.5	2.7	20.4
LR193	Wan-Pai-Shih	TW_Ind	Taiwan	3.2	7.2	2.3	23
LR194	Hsin-Ch'ung	TW_Ind	Taiwan	3.1	7	2.3	21.5
LR195	Nan-Tzu-Shien	TW_Ind	Taiwan	3.1	7.5	2.4	23.3
LR196	Pai-Mi-Chin-Hou	TW_Ind	Taiwan	2.8	7.7	2.7	21.4
LR198	He No	TW_Ind	Taiwan	2.6	9.4	3.7	24
LR216	TSAI-YUAN-CHON	TW_Ind	Taiwan	3.1	7.8	2.5	24.3
LR221	P 170	TW_Ind	Taiwan	2.8	7.9	2.8	22.1
LR224	PIN CHUAN B	TW_Ind	Taiwan	3	7.8	2.6	23.5
LR241	ching-kao-an	TW_Ind	Taiwan	2.9	8.2	2.9	23.5
UL021	Purahaitairin	TW_Temp	Taiwan	3.2	7.5	2.4	23.7
UL022	Hopotsutaiyaru	TW_Ind	Taiwan	2.8	7.9	2.8	22.4
UL026	Ragasu	TW_Temp	Taiwan	3.6	7.9	2.2	28.5
UL027	Pairauwar	TW_trop1	Taiwan	3.2	7	2.2	22.1
UL028	Nutsurikui	TW_Temp	Taiwan	3.6	9.5	2.6	34.2
UL029	Midon	TW_Ind	Taiwan	3	8	2.7	24.2
UL030	Burieuraozu	TW_Temp	Taiwan	2.7	8	3	21.7
UL031	Papito	TW_Temp	Taiwan	3.1	8.3	2.7	25.9
UL032	Mandarakiku	TW_Temp	Taiwan	3.2	7.1	2.3	22.4
UL033	Pairaur	TW_trop1	Taiwan	3.7	8.4	2.3	31.1
UL034	Tangengenrankatsu	TW_Ind	Taiwan	2.8	7.4	2.6	20.7
UL035	Paotsupagaiahon	TW_Temp	Taiwan	3.1	8	2.6	25
UL036	Montana	TW_trop1	Taiwan	2.2	8	3.6	17.8
UL037	Muteka	TW_Temp	Taiwan	3.1	7.4	2.4	23.3
UL038	Haifugoya	TW_Temp	Taiwan	3.1	7.2	2.4	22
UL039	Natara	TW_trop2	Taiwan	3.3	7.2	2.2	23.7
UL040	Pazumatamaru	TW_Temp	Taiwan	3.5	7.4	2.1	25.8
UL041	Kabofu	TW_Temp	Taiwan	3.4	7.2	2.1	24.9
UL042	Tahobin	TW_Temp	Taiwan	3.5	7.4	2.1	25.8
UL043	Nabohai	TW_Temp	Taiwan	3.3	7.4	2.2	24.5
UL044	Nakairitsu	TW_trop2	Taiwan	2.9	8.2	2.8	24
UL045	Munagurusu	TW_trop2	Taiwan	3.2	8.2	2.6	25.8
UL046	Kabotsumame	TW_trop2	Taiwan	2.9	7.8	2.7	22.7
UL047	Bohai	TW_trop2	Taiwan	3.2	8.2	2.6	26.3
UL048	Gurusu	TW_trop2	Taiwan	3	8.9	2.9	27
UL049	Matara	TW_trop2	Taiwan	3.2	8.2	2.5	26.3
UL050	Nobohai	TW_Ind	Taiwan	3.2	7.2	2.3	22.8
UL051	Parahainakoru	TW_Ind	Taiwan	2.9	8.4	2.9	24
UL052	Habun No1	TW_Ind	Taiwan	3.3	7	2.1	22.7
UL053	Nakarofukarapai S1	TW_trop2	Taiwan	3.3	8.1	2.5	26.5
UL054	Napatsupai	TW_Ind	Taiwan	3.4	7.3	2.2	24.7
UL055	Chuan No. 2	TW_trop2	Taiwan	3.2	8.3	2.6	26.9
UL056	Chuan No. 3	TW_trop2	Taiwan	2.9	7.8	2.7	22.1
UL057	Chuan No. 4	TW_trop2	Taiwan	2.9	8.1	2.8	23.7
UL058	Ragarasu	TW_Ind	Taiwan	2.6	8	3	21.1
UL059	Tapopuri	TW_Ind	Taiwan	2.6	8.1	3.1	21.3
UL060	Unknown	TW_Ind	Taiwan	2.7	8.1	3	21.8
UL061	Pakaikauneku	TW_admix	Taiwan	3.2	8.4	2.6	26.8
UL062	Kaisentetsuchitsu	TW_Ind	Taiwan	2.8	7.2	2.6	20.2
UL063	Napatsupai S3	TW_Ind	Taiwan	2.7	7.9	2.9	21.6
UL064	Baridon	TW_Ind	Taiwan	2.6	8.7	3.3	22.8
UL075	Paerizumochi	TW_Ind	Taiwan	2.9	7.6	2.7	21.6
UL076	Tarunatsumochi	TW_Temp	Taiwan	3.7	8.4	2.3	31.3
UL077	Warisanmochi 1	TW_Temp	Taiwan	3.2	8.1	2.6	25.7
UL078	Warisanmochi 2	TW_Temp	Taiwan	3.6	7.8	2.2	27.9
UL079	Szu Ming Lu Tao No 2	TW_trop1	Taiwan	3.1	8.4	2.7	26.3
UL080	Komapatai	TW_Temp	Taiwan	3.5	9	2.6	31.4
UL081	Pagaitsuitaiyaru	TW_Temp	Taiwan	3.2	6.9	2.1	22.1
UL082	Airaromu	TW_Temp	Taiwan	3.9	8.8	2.2	34.2
UL083	Pazumataharu	TW_Temp	Taiwan	3.3	7.7	2.4	25.3
UL084	Nakara 2	TW_trop1	Taiwan	3.3	7.7	2.3	25.7
UL085	Nakabo	TW_Temp	Taiwan	3.2	7	2.1	22.6
UL086	Naguton	TW_trop1	Taiwan	3.1	7.6	2.4	23.8
UL087	Komonawai	TW_trop2	Taiwan	3.3	8.4	2.5	27.7
UL088	Pintowan 1	TW_Temp	Taiwan	3.7	9.7	2.7	35.6
UL089	Koodngoi	TW_Temp	Taiwan	3.4	7.8	2.3	26.7
UL090	Kahorui	TW_trop2	Taiwan	3.6	9	2.5	32.5
UL091	Tongsisai	TW_Temp	Taiwan	3.4	8.6	2.5	29.1
UL092	Banadoion	TW_trop1	Taiwan	3.6	8.1	2.2	29.2
UL100	Patsupatsu	TW_Temp	Taiwan	3.5	7.5	2.2	26.1
UL103	RuiYan	TW_Temp	Taiwan	3.6	8.3	2.3	29.6
UL104	INAGU	TW_Temp	Taiwan	3.5	8.5	2.4	30.2
UL110	Hualien40	TW_Ind	Taiwan	3	6.8	2.3	20.5
UL111	Hualien49	TW_Temp	Taiwan	3.7	8.2	2.2	30.4
UL113	Hualien60	TW_Temp	Taiwan	3.4	7.4	2.2	25.4
UL116	Hualien81	TW_Ind	Taiwan	3.2	8.1	2.5	26.4
UL118	Hualien123	TW_Ind	Taiwan	2.9	10.3	3.5	30.2
UL119	Hualien124	TW_Ind	Taiwan	3.1	9.8	3.2	29.9
UL120	Hualien125	TW_Ind	Taiwan	3.4	7.7	2.3	25.8
UL121	Hualien126	TW_Temp	Taiwan	3.2	7.3	2.3	23.6
UL124	PaKengKeng	TW_Ind	Taiwan	2.9	7.6	2.6	22
UL126	CD1	TW_Temp	Taiwan	3.7	9.6	2.6	35.5
UL127	CD2	TW_Temp	Taiwan	3.7	10.2	2.7	38
UL128	CD5	TW_Ind	Taiwan	3.2	8.3	2.6	26.7
UL129	CD7	TW_Temp	Taiwan	3.6	7.9	2.2	28.2
UL130	CD8	TW_Temp	Taiwan	3.6	8.2	2.3	29.5
UL131	CD9	TW_Temp	Taiwan	3.7	9	2.4	33.4
UL132	CD10	TW_Temp	Taiwan	3.8	10	2.6	38.2
UL133	CD12	TW_Temp	Taiwan	3.5	7.8	2.2	27.8
UL134	CD13	TW_Temp	Taiwan	3.6	8.4	2.3	30.6
UL135	Maolin23	TW_trop2	Taiwan	3.7	8	2.2	29.3
UL136	Maolin39-1	TW_Ind	Taiwan	3.1	7.1	2.3	22.2
UL139	Maolin45	TW_Ind	Taiwan	3.1	7.8	2.5	24
UL140	Hsing-mei1	TW_Temp	Taiwan	3.6	10.9	3	39.7
UL141	Hsing-mei2	TW_Temp	Taiwan	3.8	10.6	2.8	40.2
UL142	Hsing-mei5	TW_Ind	Taiwan	3.2	8.7	2.7	28.3
UL143	Hsing-mei9	TW_trop2	Taiwan	3.3	8.7	2.6	28.6
UL144	CSRed	TW_Ind	Taiwan	3.4	7.7	2.3	25.8
UL199	Hualien137	TW_Temp	Taiwan	3.6	7.9	2.2	28.7
UL217	CD4	TW_Temp	Taiwan	3.4	7.9	2.3	27.1
UL220	Hualien129-2	TW_Ind	Taiwan	3.3	10.1	3.1	33.4
UL221	MONTANO	TW_Ind	Taiwan	2.3	8	3.6	18.2
UL224	NANTON 53	TW_trop1	Taiwan	3.7	8.3	2.2	30.5
UL229	KUNG SHAN WU SHEN KEN	TW_Temp	Taiwan	3.6	7.7	2.1	27.6
UL231	KWAN FU HSIANG NUO	TW_Temp	Taiwan	3.7	8.3	2.3	30.7
UL234	UNNAMED	TW_Ind	Taiwan	3	10	3.3	30.4
UL236	Chuan No. 7	TW_Ind	Taiwan	3.6	7.3	2	26.1
UL241	NABESHI	TW_trop2	Taiwan	2.8	8.2	3	22.9

## Sheet: Table S6
Table S6. Allele information for the 14 genes studied. Gene name, locus name, references, mutation position, mutation type, reference sequence and the alternative sequences are listed. Published mutations are highlighted (bold). (Excel file)
1
	gene name	locus	reference	gene desicription
gene	LGY3 gene	Os03g0215400	(Liu et al 2017)	a rice grain yield quantitative trait locus on chromosome 3
mutation code	chrom 3	type 1	type 1a
position in chrom	position	6053303	6053304
mutation type	mutation type	splicing	splicing
Reference seq	Ref seq	C	TTCACCAAGGA
Alternative seq	Alt seq	A,*	T,*
note	Alternative splicing led to long and slender grain
2
gene	GS3 gene	Os03g0407400	(Fang et al 2006)	grain shape (length and weight) gene on chromosome 3
mutation code	chrom 3	type 1	type 2	type 3	type 4	type 5	type 6
position in chrom	position	16734973	16734942	16733441	16731948	16730053	16729853
mutation type	mutation type	frameshift	splicing	early stop	splicing	frameshift	early stop
Reference seq	Ref seq	G	AGATAGAGATAGATT	G	C	AGGAG	G
Alternative seq	Alt seq	GTGTTGAGATTATGGGCATAT,GTGTTGAGATTATGGGCATATAATGATTTAATTTATTCC	A	T	T	A	T
note	Early stop lead to large grain
3
gene	qTGW3 gene	Os03g0841800	(Hu et al 2018)	quantitative trait controlling grain size and weight on chrosmome 3
mutation code	chrom 3	type 1	type 2	type 3
position in chrom	position	35390485	35390422	35386944
mutation type	mutation type	splicing	splicing	early stop
Reference seq	Ref seq	G	C	G
Alternative seq	Alt seq	A	T	T
note	Splicing site mutation caused improvement in grain length and weight
4
gene	qSW5 gene	not present in ref seq	(Shomura et al 2008)	quanyitative trait controlling seed width on chromosome 5
note	partial gene present in ~5Mb on chromosome 5
mutation type	type 0	type 1	type 2
deletion length	0.95 kb deletion	1.2 kb deletion	13.4 kb deletion
note	An 1.2-kb deletion in gene region abolsihed the gene, leading to wider seed
5
gene	TGW6 gene	Os06g0623700	(Ishimaru et al 2013)	Thousand grain weight on chromosome 6
mutation code	chrom 6	type 1	type 2	type 3
position in chrom	position	25093498	25093552	25094293
mutation type	mutation type	frameshift	frameshift	stop loss
Reference seq	Ref seq	CCGCT	CG	A
Alternative seq	Alt seq	C	C	G
note	A premature stop caused increase in grain size
6
gene	GW6a gene	Os06g0650300	(Song et al 2014)	Grain weight on chromosome 6
mutation code	chrom 6	type 1	type 1a
position in chrom	position	26594047	26594325
mutation type	mutation type	promoter seq del	promoter seq del
Reference seq	Ref seq	TCAGCTG	GA
Alternative seq	Alt seq	T	G
note	Promoter sequence changes led to increase in grain weight
7
gene	RAE2 gene	Os08g0485500	Bessho-Uehara et al 2016	Also known as GAD1 (Jin et et 2016)
mutation code	chrome 8	type 1	type 2	type 3	type 4	type 5	type6	type 7
position in chrom	position	23999535	23999538	23999540	23999541	23999543	23999544	23999545
mutation type	mutation type	frameshift	frameshift	frameshift	frameshift	frameshift	frameshift	frameshift
Reference seq	Ref seq	CCGCCG	CCGCGCCG	G	CGCCG	CCG	C	G
Alternative seq	Alt seq	C	C,CCGCCG	GC,GCCGCCGCCGCCGCCGCCGC,GCCGCCGCCGC	C	C	CCG	GC
note
gene	Rc gene	Os07g0211500	(Sweeney et al 2006)
mutation code	chrom 7
position in chrom	position	6068071
mutation type	mutation type	indel
Reference seq	Ref seq	A
Alternative seq	Alt seq	AATGCGAAAAGTCGG
9
gene	GBSS gene	Os06g0133000	(Wanchana et al, 2003)	glutinous
mutation code	chrom 6	type 1
position in chrom	position	1767006
mutation type	mutation type	23-bp insertion
Reference seq	Ref seq	G
Alternative seq	Alt seq	GCCACGGGTTCCAGGGCCTCAAGC
10
gene	qSH1	Os01g0848400	(Konishi et al 2006)	Shattering
mutation code	chrom 1	G or T
position in chrom	position	36461792
mutation type	mutation type	SNP
Reference seq	Ref seq	G
Alternative seq	Alt seq	T
11
gene	qSh3	Os03g0650000	(Ishikawa et all 2022)	Shattering
mutation code	chrom 3	T or C
position in chrom	position	25197521
mutation type	mutation type	SNP
Reference seq	Ref seq	T
Alternative seq	Alt seq	C
12
gene	Sh4	Os04g0670900	(Li et al 2006)	Shattering
mutation code	chrom 4	A or C
position in chrom	position	34232985
mutation type	mutation type	SNP
Reference seq	Ref seq	A
Alternative seq	Alt seq	C
13
gene	Cold1 gene	Os04g0600800	(Ma et al 2015)	adaptation to cold environment
mutation code	chom 4	A or T or C
position in chrom	position	30315214
mutation type	mutation type	SNP
Reference seq	Ref seq	A
Alternative seq	Alt seq	T,C
14
gene	Hd1 gene	Os06g0298200	(Yano et al 2000, Takahashi & Shimamoto 2011, Wu et al 2020)	sensitivity to day leangth
mutation code	chrom 6	type 3	type 13	type 7	type 12	type 20	type 19
position in chrom	position	9336853	9338004	9338220	9338243	9338273	9336376
mutation type	mutation type	frameshift	frameshift	frameshift	early stop	early stop	frameshift
Reference seq	Ref seq	TC	CTT	CAAGA	C	A	1.9 kb-insertion
Alternative seq	Alt seq	T	C	C	T	T

## Sheet: Table S7
Table S7. Statistics values for seed dimension information. Sample size; median, range, and interquartile range; mean; and significance level are indicated. (Excel file)
Seed length
subpopulation	sample size	x.Min.	x.1st Qu.	x.Median	x.Mean	x.3rd Qu.	x.Max.	cld.length
V6	60	6.76	7.41	7.81	7.98	8.26	10.32	d
V13	76	6.1	7.6	7.9	7.98	8.4	10	d
V11	153	5.9	7.9	8.4	8.45	9	11.4	c
V12	218	5.8	8.2	9	8.88	9.8	11.3	ab
V8	139	5.7	8.1	8.59	8.61	9.1	10.8	abc
V9	98	6.1	7.9	8.3	8.33	8.8	10.9	cd
V7	52	6.9	8.38	8.75	8.83	9.35	10.9	abc
V10	137	5.7	8.2	8.8	8.73	9.4	10.7	abc
V5	22	6.9	7.8	8.33	8.23	8.5	9.4	bcd
V1	31	7.3	7.88	8.35	8.59	8.98	10.93	abcd
V4	70	5.4	8.15	9	8.99	9.8	11.7	a
V2	97	5.7	6.9	7.21	7.32	7.5	9.4	e
Seed width
subpopulation	sample size	x.Min.	x.1st Qu.	x.Median	x.Mean	x.3rd Qu.	x.Max.	cld.width
V6	60	2.26	2.74	2.92	2.93	3.12	3.37	efg
V13	76	2.28	2.89	3.1	3.05	3.2	3.54	de
V11	153	2	2.7	2.8	2.83	3	3.4	g
V12	218	1.6	2.6	2.9	2.89	3.1	4.1	fg
V8	139	2	2.8	3.04	3.02	3.3	3.9	e
V9	98	2	2.8	3.05	3	3.2	3.9	ef
V7	52	2.7	3.2	3.3	3.34	3.42	4	abc
V10	137	2.1	3	3.3	3.27	3.6	4.4	bc
V5	22	2.69	3.15	3.38	3.36	3.58	3.8	abc
V1	31	2.92	3.47	3.6	3.57	3.69	3.9	a
V4	70	2.6	3	3.4	3.42	3.8	4.3	ab
V2	97	2.29	3.11	3.24	3.22	3.4	3.7	cd
l/w ratio
subpopulation	sample size	x.Min.	x.1st Qu.	x.Median	x.Mean	x.3rd Qu.	x.Max.	cld.ratio
V6	60	2.1	2.47	2.68	2.74	2.9	3.7	cde
V13	76	1.9	2.39	2.52	2.61	2.73	4.2	ef
V11	153	2	2.7	3	3.02	3.3	4.4	ab
V12	218	2.1	2.7	3.1	3.12	3.5	4.4	a
V8	139	1.9	2.5	2.8	2.9	3.2	4.9	bc
V9	98	2.1	2.5	2.7	2.82	3	5	cd
V7	52	2.1	2.48	2.65	2.66	2.8	3.7	def
V10	137	1.8	2.3	2.7	2.73	3	4.1	cde
V5	22	2.1	2.32	2.4	2.46	2.6	2.7	efg
V1	31	2.2	2.2	2.3	2.41	2.6	3	fg
V4	70	1.7	2.4	2.7	2.65	2.8	3.8	def
V2	97	1.9	2.1	2.24	2.31	2.4	4.1	g
l*w size index
subpopulation	sample size	x.Min.	x.1st Qu.	x.Median	x.Mean	x.3rd Qu.	x.Max.	cld.index
V6	60	18.2	21.48	22.5	23.32	24.3	33.4	d
V13	76	15.1	22.98	24.6	24.31	26	29.4	cd
V11	153	16.4	21.6	23.7	23.88	26.1	31.9	d
V12	218	10.1	22.33	26.5	25.83	29.4	38.5	c
V8	139	16.4	23.45	26.2	25.97	28.65	35.2	c
V9	98	14	22.9	25.15	24.95	27.12	33.1	cd
V7	52	22.1	27.78	28.9	29.51	30.85	36	ab
V10	137	17.8	25.2	28.8	28.51	32	39.6	b
V5	22	18.6	24.78	28.1	27.78	30.75	34.6	abc
V1	31	22.7	27.85	30.2	30.71	33.8	40.2	ab
V4	70	14	25.62	30.25	31.07	35.5	45.6	a
V2	97	14.3	22	23.4	23.53	24.9	32.2	d

## Sheet: Table S8
Table S8. Selection pressure analyses of the 14 genes in the Asian rice landraces. (Excel file)
Subpopulation	Number of sequences used	LGY3	GS3	qTWG3	qSW5	TGW6	GW6a	RAE2	Rc	GBSS	qSH1	qSH3	SH4	Cold1	Hd1
		Tajima's D	Tajima's D	Tajima's D	Tajima's D	Tajima's D	Tajima's D	Tajima's D	Tajima's D	Tajima's D	Tajima's D	Tajima's D	Tajima's D	Tajima's D	Tajima's D
v1	43	-1.348	-0.666	+2.456*	-1.302	-2.026*	-2.488**	-1.177	-0.329	-1.346	-2.663***	+0.328	-0.041	+2.031	-1.909*
v2	175	+0.727	-2.932***	-1.258	N/A	-0.971	-0.966	-1.492	-1.303	-2.736***	-1.932*	-2.282**	-1.725	-2.524***	-1.932*
v3	14	-0.912	-1.243	-0.074	-1.541	-1.404	-0.876	-1.648	-1.244	-1.732	-1.044	-1.443	-1.305	-1.586	-1.842*
v4	71	-1.971*	-2.045*	-2.545***	+0.393	-2.738***	-2.473**	-1.801*	-1.035	-2.593***	-1.435	-2.087*	-0.810	+0.829	-1.508
v5	23	-0.636	-1.992*	-2.657***	-2.643***	-1.524	-1.306	-1.515	-1.161	+1.095	-0.897	-1.881*	-1.679	-1.765	+1.358
v6	97	-2.231**	-0.011	-1.701	-2.652***	-1.907*	-1.611	-2.796***	-1.381	-2.379**	-1.991*	-1.531	-0.146	-1.320	-2.562***
v7	52	+0.881	-2.908***	-1.962	N/A	-2.803***	-2.608***	-1.578	-2.843***	+0.255	-1.318	-1.826*	-1.742	+1.973	-1.765
v8	142	-0.942	-2.504***	-1.795*	-2.666***	-1.955*	-1.982*	-2.642***	-1.733	-2.606***	-2.495***	-2.382**	-2.823***	-0.678	-2.083*
v9	102	-1.368	-1.907*	-0.949	-0.525	-1.431	-0.653	0.192	-0.520	-2.286**	-0.937	-2.134*	-2.555***	-1.539	-0.707
v10	142	-2.199**	-2.158**	-2.519***	N/A	-2.255**	-2.632***	-2.100*	-2.540***	-2.566***	-2.662***	-2.238**	-2.455**	-2.173**	-2.176**
v11	157	-2.450**	-2.337**	+0.166	-2.262**	-1.875*	-2.631***	-2.654***	-1.452	-2.000*	-2.700***	-2.012*	-1.552	-2.401**	-2.516***
v12	218	-2.133**	-1.886*	-2.193**	-1.911*	-2.039*	-1.426	-2.003*	-1.299	-0.903	-2.075*	-2.016*	-1.939*	-1.934*	-1.750
v13	97	-2.333**	+1.166	-0.550	-1.923*	+3.919***	-2.279**	-2.752***	-0.065	-2.822***	+1.297	-1.739	-2.681***	-0.154	-0.493
v14	33	-1.737	-2.272**	-1.804	-0.489	+0.225	-0.035	-0.466	-2.179**	-1.140	-1.865*	N/A	N/A	-1.832*	N/A
