# Supplementary material for: Allele mining of seed-related genes reveals early movement, selection and adaptation of Asian rice landraces
Source: Research Square preprint supplement (doi:10.21203/rs.3.rs-6249167/v1), 2025-03-28
Supplement: Supplementary file 2 [file aebc7be5effb4a6f90e004ea.docx]

**Supplementary materials**

**Table S1.** Excavated sites, estimated dates and cultures of the carbonated rice grains in the current study. (Excel file, with Chinese translation)

**Table S2.** Materials and their related information used in the study. Accession names, K value in structure analysis, region collected, BioProject (resequencing data in NCBI), culture mode, GPS information, allele types for each of the 14 genes are listed. (Excel file)

**Table S3.** Taiwan indigenous rice accessions used in the study. Accession names, sub-species, tribe where collected, and estimated collecting time are listed. (Excel file)

**Table S4.** Morphology of 10 indigenous accessions collected from the Tsou tribe. Subspecies, awn length, awn color, grain color, caryopsis color, glutenous type, seed length, seed width, seed length/width ratio and area (length*width) are listed. (Excel file)

**Table S5.** Accessions with seed size information. Accessions names, region collected, seed length and seed width are listed. (Excel file)

**Table S6.** Allele information for the 14 genes studied. Gene name, locus name, references, mutation position, mutation type, reference sequence and the alternative sequences are listed. Published mutations are highlighted (bold). (Excel file)

**Table S7.** Statistics values for seed dimension information. Sample size; median, range, and interquartile range; mean; and significance level are indicated. (Excel file)

**Table S8.** Selection pressure analyses of the 14 genes in the Asian rice landraces. (Excel file)

**Fig S1.** Morphologic variation of 4 accessions collected from the Tsou tribe. A-D, plant morphology during heading; E-H, morphology of grain; I-L, morphology of caryopsis. A, E, I are CD1 accessions; B, F, J are CD7 accessions; C, G, K are CD10 accessions; D, H, L are CD5 accessions.

**Fig S2.** Structure analysis based on single nucleotide polymorphisms and assuming k= 2 to 15.

**Fig S3.** Cross-validation error vs K value in the admixture analysis.

**Fig. S4.** Principal component analysis (PCA) of Asian rice landraces. A, PCA plot of principal component 1 (PC1) and 2; B, PCA plot of PC1 and 3. Empty triangles indicate *indica* rice, solid squares wild relatives, and empty circles *japonica* rice. Color code for each subgroup: V1: Gray, V2: Dodger Blue, V3: Indian Red, V4: Crimson, V5: Deep Sky Blue; V6: Light Coral, V7: Forest Green, V8: Sky Blue, V9: Black, V10: Purple; V11: Gold, V12: Dim Gray, V13: Pink, V14: Lime Green

**Fig S5.** Violin plots for the seed parameters of 12 subgroups of Asian rice landraces. A, seed length (l); B, seed width (w); C, seed l/w ratio; seed l*w value (area index). Significance levels and population size are indicated for each subpopulation.

**Fig S6.** Analysis of *qSW5* gene region. The semi-assembled genome of *indica* rice R498 (Du et al 2017) were used for alignment. A, primer pairs for PCR analysis. B, seed morphology for 16 seeds tested. The left-most is Nipponbare and the second is IR64. C, PCR products for these lines. D-G, Integrative Genomics View of aligned reads of the ~19-kb region in short arm chromosome 5, with *qSW5* gene in the center. D, an accession without any large deletion in the region. E, an accession with 0.95-kb deletion (Duan et al 2017). F, an accession with 1.2-kb deletion (Shomura et al 2008). G, an accession with 13.4-kb deletion (the present study). *qSW5* (one ORF) and *GW5* (3 ORF) are shown at the bottom. The scale bar is 1 kb.

**Fig. S7.** Violin statistical plots for grain size distribution for different *qSW5* alleles. From left to right are wild type (total), wild type (*indica* only), 0.95-kb deletion (total), 0.95-kb deletion *(indica* ony), 1.2-kb deletion and 13.4-kb deletion. Sample size and significant levels are shown.

**Fig. S8.** Taiwan indigenous farmers still performed panicle selection at harvesting stage. We visited Li-chia village (GPS 22.779, 121.065, 130 m above sea level) of the Puyama tribe on May 18, 2015. Panel A, we discussed with the two ladies who performed the selection. B and C show the 14 bundles of panicles they selected for the following growing season. D: Other panicles were dried under the sun and put in bags, ready to store in the barn.
